# Supplementary material for: Identification and characterization of a novel molecular classification based on disulfidptosis-related genes to predict prognosis and immunotherapy efficacy in hepatocellular carcinoma
Source: publisher site journal article supplement (doi:10.18632/aging.204809), 2023-07-03
Supplement: Supplementary file [file aging-v15i13-204809-supplementary-material-SD1.pdf]

**SUPPLEMENTARY FIGURES**

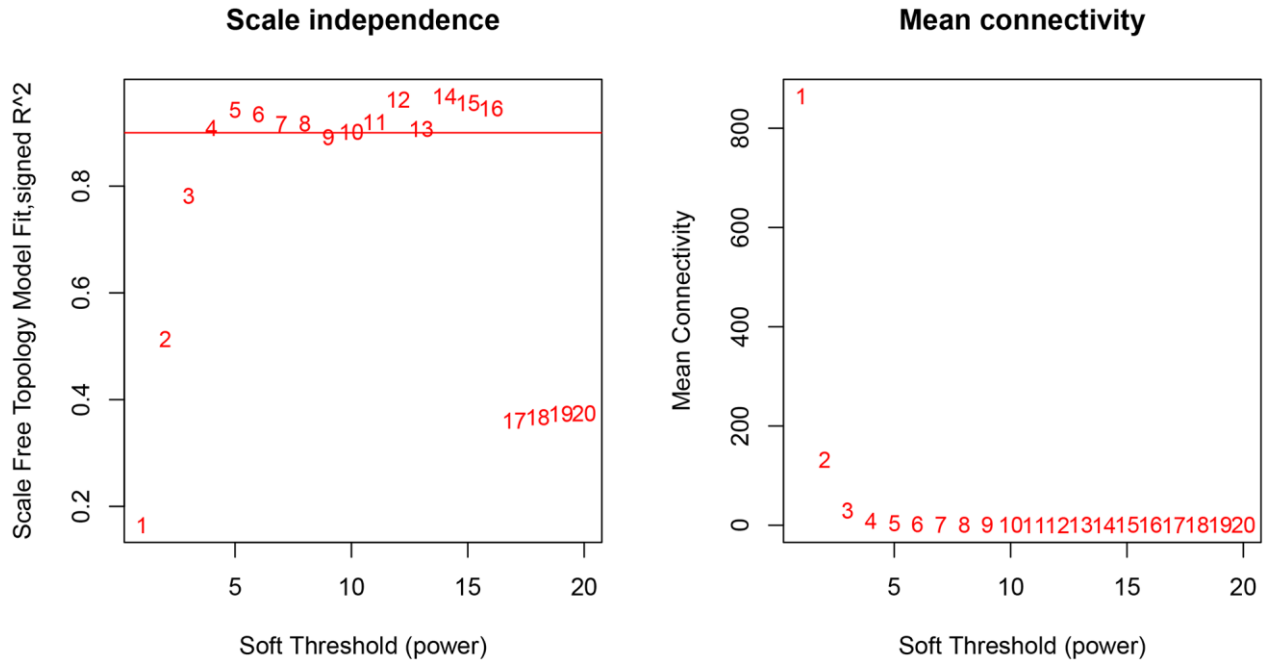

**Supplementary Figure 1.** Correspondence between the fit index and the soft threshold value, when the soft threshold value is 4, the fit index is >0.9 for the first time.

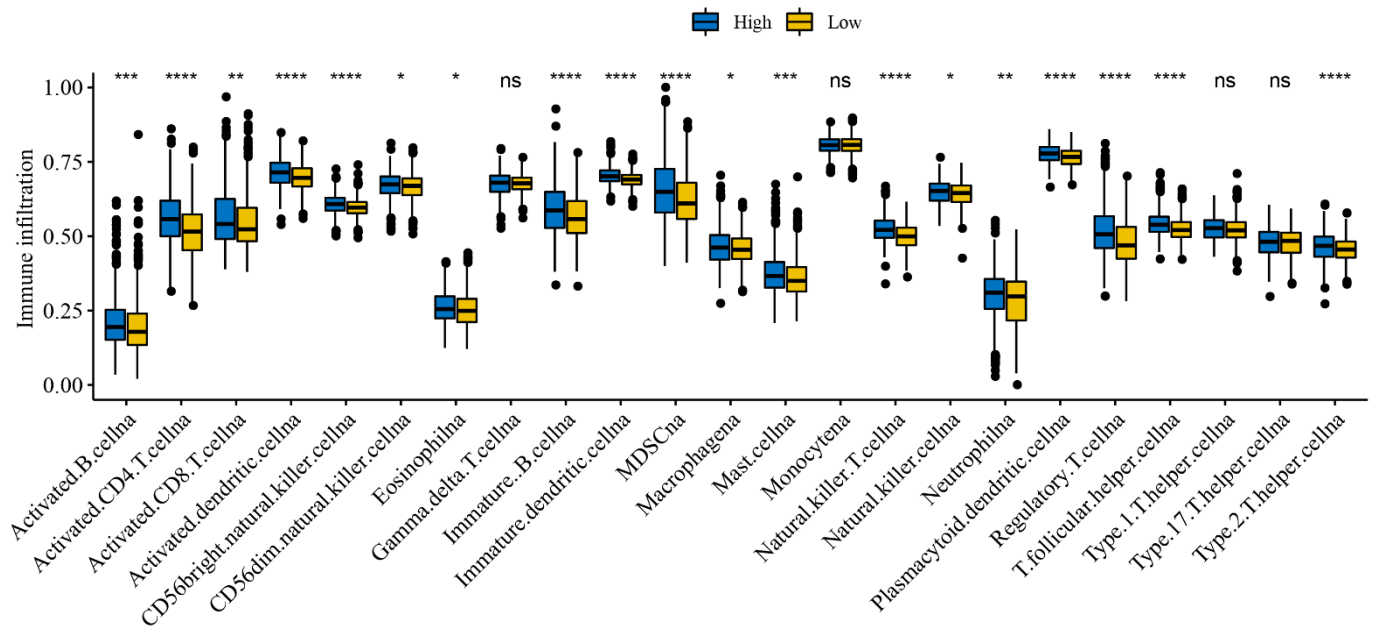

**Supplementary Figure 2.** The relationship between the high and low DRG.score groups and TME.
