# Supplementary material for: Identification and characterization of a novel molecular classification based on disulfidptosis-related genes to predict prognosis and immunotherapy efficacy in hepatocellular carcinoma
Source: Aging (Albany NY). 2023 Jul 3;15(13):6135–51. doi: 10.18632/aging.204809 (PMC10373967; doi:10.18632/aging.204809)
Supplement: Supplementary Table 1 [file aging-15-204809-s002.xlsx]

## Sheet: Sheet1
Supplementary Table 1. The different genes between the 2 clusters.
id	logFC	AveExpr	t	P.Value	adj.P.Val	B
TXNRD1	-1.01696	7.1606	-16.5499	2.25699e-55	4.12831e-53	115.103
LAPTM4B	-1.07924	7.53312	-14.2759	1.05392e-42	6.07083e-41	86.1534
GNMT	1.35851	6.41226	11.9452	4.2811e-31	8.43758e-30	59.6634
SLC22A1	1.60771	6.39015	11.6377	1.1149e-29	1.92768e-28	56.4369
FBP1	1.03666	8.31875	11.5885	1.86613e-29	3.14318e-28	55.9271
SAA4	1.39069	8.64167	11.3457	2.31515e-28	3.55489e-27	53.4355
SLC27A5	1.13362	7.34668	11.1789	1.27517e-27	1.85166e-26	51.7477
FTCD	1.02096	7.6455	11.0399	5.20595e-27	7.26603e-26	50.3564
SPP1	-1.86583	7.74822	-10.9621	1.13593e-26	1.53409e-25	49.5849
AGXT	1.165	9.44172	10.7079	1.41391e-25	1.76333e-24	47.0921
RDH16	1.21981	7.12827	10.6318	2.97947e-25	3.6163e-24	46.3553
AKR1D1	1.0616	6.59746	10.3304	5.47246e-24	5.99957e-23	43.4794
AFM	1.20366	7.74409	9.81897	6.52974e-22	6.07848e-21	38.7578
HGFAC	1.37372	5.3899	9.79112	8.42351e-22	7.76512e-21	38.5064
CFHR4	1.00225	5.83637	9.61957	3.99049e-21	3.46996e-20	36.9716
APOC3	1.01219	12.5898	9.54002	8.14502e-21	6.87611e-20	36.2678
ALDOB	1.21443	10.8143	9.47132	1.5024e-20	1.23339e-19	35.6639
APOF	1.09586	5.9336	9.4384	2.0119e-20	1.63747e-19	35.3759
HRG	1.24794	9.54889	9.23324	1.21833e-19	9.31934e-19	33.6002
APOA1	1.01178	12.5352	9.0503	5.90158e-19	4.26107e-18	32.0454
HAO2	1.03742	5.32658	8.9875	1.00817e-18	7.12625e-18	31.5178
SLC22A7	1.00334	6.74428	8.88017	2.49921e-18	1.70976e-17	30.6236
PCK1	1.13307	7.55806	8.8738	2.63688e-18	1.80158e-17	30.5708
SLC10A1	1.24635	7.30127	8.82574	3.94648e-18	2.65287e-17	30.1737
F9	1.103	7.58002	8.7392	8.11996e-18	5.33787e-17	29.4633
GCGR	1.10637	4.98429	8.71548	9.88518e-18	6.46973e-17	29.2697
CYP2A6	1.42766	6.73033	8.50047	5.75763e-17	3.55622e-16	27.5356
CD24	-1.07286	6.93274	-8.31074	2.64194e-16	1.53796e-15	26.0371
ADH1B	1.06163	8.5836	8.19147	6.78101e-16	3.82156e-15	25.1105
SPP2	1.07641	7.22385	8.05332	1.99104e-15	1.0874e-14	24.0521
CYP2C8	1.00699	7.79037	7.70705	2.76169e-14	1.37111e-13	21.4703
LECT2	1.02817	7.22883	7.64098	4.50961e-14	2.20324e-13	20.9893
TAT	1.08401	7.38033	7.60297	5.96935e-14	2.88666e-13	20.7142
SAA1	1.23305	7.91134	7.26411	6.88911e-13	3.03715e-12	18.3173
HAMP	1.01519	5.42466	7.07573	2.57217e-12	1.08135e-11	17.0279
SDS	1.10387	6.91783	6.97539	5.12411e-12	2.09588e-11	16.3538
PLA2G2A	1.1682	6.36153	6.5823	7.01145e-11	2.6286e-10	13.7985
S100P	-1.07017	5.1904	-6.19269	8.20629e-10	2.80521e-09	11.4017
HPD	1.03034	8.77634	6.07429	1.68776e-09	5.6363e-09	10.7004
CYP3A4	1.09568	6.90913	5.94556	3.64493e-09	1.17946e-08	9.95235
