# Supplementary material for: Identification and characterization of a novel molecular classification based on disulfidptosis-related genes to predict prognosis and immunotherapy efficacy in hepatocellular carcinoma
Source: Aging (Albany NY). 2023 Jul 3;15(13):6135–51. doi: 10.18632/aging.204809 (PMC10373967; doi:10.18632/aging.204809)
Supplement: Supplementary Table 2 [file aging-15-204809-s003.xlsx]

## Sheet: Sheet1
Supplementary Table 2. GO analysis between the 2 clusters.
ONTOLOGY	ID	Description	GeneRatio	BgRatio	pvalue	p.adjust	qvalue	geneID	Count
BP	GO:0008202	steroid metabolic process	9/40	323/18903	1.90696e-08	1.90887e-05	1.24053e-05	SLC27A5/SPP1/RDH16/AKR1D1/APOF/APOA1/CYP2A6/CYP2C8/CYP3A4	9
BP	GO:0044282	small molecule catabolic process	9/40	385/18903	8.59708e-08	4.30284e-05	2.79631e-05	FTCD/AGXT/AKR1D1/ALDOB/PCK1/TAT/SDS/HPD/CYP3A4	9
BP	GO:0072330	monocarboxylic acid biosynthetic process	7/40	218/18903	3.32484e-07	7.16363e-05	4.65547e-05	SLC27A5/AKR1D1/APOC3/APOA1/CYP2C8/SDS/CYP3A4	7
BP	GO:0046394	carboxylic acid biosynthetic process	8/40	326/18903	3.41592e-07	7.16363e-05	4.65547e-05	SLC27A5/AGXT/AKR1D1/APOC3/APOA1/CYP2C8/SDS/CYP3A4	8
BP	GO:0016053	organic acid biosynthetic process	8/40	328/18903	3.57824e-07	7.16363e-05	4.65547e-05	SLC27A5/AGXT/AKR1D1/APOC3/APOA1/CYP2C8/SDS/CYP3A4	8
BP	GO:0034754	cellular hormone metabolic process	6/40	141/18903	4.82212e-07	8.04491e-05	5.2282e-05	SPP1/RDH16/AKR1D1/ADH1B/CYP2C8/CYP3A4	6
BP	GO:0046395	carboxylic acid catabolic process	7/40	243/18903	6.9107e-07	9.29903e-05	6.04322e-05	FTCD/AGXT/AKR1D1/PCK1/TAT/SDS/HPD	7
BP	GO:0016054	organic acid catabolic process	7/40	247/18903	7.7109e-07	9.29903e-05	6.04322e-05	FTCD/AGXT/AKR1D1/PCK1/TAT/SDS/HPD	7
BP	GO:0006066	alcohol metabolic process	8/40	367/18903	8.36077e-07	9.29903e-05	6.04322e-05	RDH16/AKR1D1/APOF/APOA1/PCK1/ADH1B/CYP2C8/CYP3A4	8
BP	GO:0006631	fatty acid metabolic process	8/40	400/18903	1.5935e-06	0.000159509	0.000103661	SLC27A5/APOC3/APOA1/HAO2/PCK1/CYP2A6/CYP2C8/CYP3A4	8
BP	GO:0071466	cellular response to xenobiotic stimulus	6/40	183/18903	2.2145e-06	0.000201519	0.000130963	FBP1/SLC22A7/SLC10A1/CYP2A6/CYP2C8/CYP3A4	6
BP	GO:0006869	lipid transport	8/40	433/18903	2.87266e-06	0.000239628	0.000155728	SLC27A5/SPP1/CFHR4/APOC3/APOF/APOA1/SLC10A1/PLA2G2A	8
BP	GO:0009063	cellular amino acid catabolic process	5/40	113/18903	3.88864e-06	0.000299426	0.00019459	FTCD/AGXT/TAT/SDS/HPD	5
BP	GO:1901605	alpha-amino acid metabolic process	6/40	205/18903	4.2678e-06	0.000305148	0.000198308	GNMT/FTCD/AGXT/TAT/SDS/HPD	6
BP	GO:0042572	retinol metabolic process	4/40	54/18903	5.03567e-06	0.000336047	0.000218389	RDH16/ADH1B/CYP2C8/CYP3A4	4
BP	GO:0016042	lipid catabolic process	7/40	336/18903	5.93011e-06	0.000371002	0.000241106	SPP1/AKR1D1/APOC3/APOA1/PCK1/PLA2G2A/CYP3A4	7
BP	GO:0010876	lipid localization	8/40	483/18903	6.4236e-06	0.000378237	0.000245807	SLC27A5/SPP1/CFHR4/APOC3/APOF/APOA1/SLC10A1/PLA2G2A	8
BP	GO:0042445	hormone metabolic process	6/40	241/18903	1.07749e-05	0.000599205	0.000389409	SPP1/RDH16/AKR1D1/ADH1B/CYP2C8/CYP3A4	6
BP	GO:0120254	olefinic compound metabolic process	5/40	160/18903	2.11364e-05	0.00105173	0.000683496	RDH16/CYP2A6/ADH1B/CYP2C8/CYP3A4	5
BP	GO:0006706	steroid catabolic process	3/40	26/18903	2.20643e-05	0.00105173	0.000683496	SPP1/AKR1D1/CYP3A4	3
BP	GO:0042178	xenobiotic catabolic process	3/40	26/18903	2.20643e-05	0.00105173	0.000683496	CYP2A6/CYP2C8/CYP3A4	3
BP	GO:0006094	gluconeogenesis	4/40	83/18903	2.79962e-05	0.00118231	0.000768354	GNMT/FBP1/PCK1/SDS	4
BP	GO:0006520	cellular amino acid metabolic process	6/40	289/18903	3.0059e-05	0.00118231	0.000768354	GNMT/FTCD/AGXT/TAT/SDS/HPD	6
BP	GO:0015850	organic hydroxy compound transport	6/40	292/18903	3.18494e-05	0.00118231	0.000768354	SLC22A1/SLC27A5/SPP1/APOC3/APOA1/SLC10A1	6
BP	GO:0019319	hexose biosynthetic process	4/40	86/18903	3.2205e-05	0.00118231	0.000768354	GNMT/FBP1/PCK1/SDS	4
BP	GO:0001523	retinoid metabolic process	4/40	87/18903	3.37057e-05	0.00118231	0.000768354	RDH16/ADH1B/CYP2C8/CYP3A4	4
BP	GO:0008209	androgen metabolic process	3/40	30/18903	3.42527e-05	0.00118231	0.000768354	SPP1/AKR1D1/CYP3A4	3
BP	GO:0034368	protein-lipid complex remodeling	3/40	30/18903	3.42527e-05	0.00118231	0.000768354	APOC3/APOA1/PLA2G2A	3
BP	GO:0034369	plasma lipoprotein particle remodeling	3/40	30/18903	3.42527e-05	0.00118231	0.000768354	APOC3/APOA1/PLA2G2A	3
BP	GO:0016101	diterpenoid metabolic process	4/40	90/18903	3.85157e-05	0.00124368	0.000808241	RDH16/ADH1B/CYP2C8/CYP3A4	4
BP	GO:0046364	monosaccharide biosynthetic process	4/40	90/18903	3.85157e-05	0.00124368	0.000808241	GNMT/FBP1/PCK1/SDS	4
BP	GO:0034367	protein-containing complex remodeling	3/40	32/18903	4.1723e-05	0.00130515	0.000848185	APOC3/APOA1/PLA2G2A	3
BP	GO:1901606	alpha-amino acid catabolic process	4/40	95/18903	4.76234e-05	0.00144458	0.000938795	AGXT/TAT/SDS/HPD	4
BP	GO:0042573	retinoic acid metabolic process	3/40	34/18903	5.01893e-05	0.00147763	0.000960279	ADH1B/CYP2C8/CYP3A4	3
BP	GO:0006721	terpenoid metabolic process	4/40	101/18903	6.05221e-05	0.00173093	0.00112489	RDH16/ADH1B/CYP2C8/CYP3A4	4
BP	GO:0006641	triglyceride metabolic process	4/40	104/18903	6.78486e-05	0.00188657	0.00122604	SLC27A5/APOC3/APOA1/PCK1	4
BP	GO:0006090	pyruvate metabolic process	4/40	108/18903	7.85974e-05	0.00207042	0.00134552	FBP1/ALDOB/PCK1/SDS	4
BP	GO:0034308	primary alcohol metabolic process	4/40	108/18903	7.85974e-05	0.00207042	0.00134552	RDH16/ADH1B/CYP2C8/CYP3A4	4
BP	GO:0001676	long-chain fatty acid metabolic process	4/40	111/18903	8.74357e-05	0.00224418	0.00145844	SLC27A5/CYP2A6/CYP2C8/CYP3A4	4
BP	GO:0006805	xenobiotic metabolic process	4/40	118/18903	0.000110846	0.00277393	0.00180271	SLC22A7/CYP2A6/CYP2C8/CYP3A4	4
BP	GO:0019318	hexose metabolic process	5/40	229/18903	0.000116317	0.00279114	0.0018139	GNMT/FBP1/ALDOB/PCK1/SDS	5
BP	GO:0071827	plasma lipoprotein particle organization	3/40	45/18903	0.000117111	0.00279114	0.0018139	APOC3/APOA1/PLA2G2A	3
BP	GO:0006720	isoprenoid metabolic process	4/40	121/18903	0.000122155	0.00284365	0.00184802	RDH16/ADH1B/CYP2C8/CYP3A4	4
BP	GO:0006953	acute-phase response	3/40	48/18903	0.000142119	0.00316135	0.00205449	SAA4/SAA1/HAMP	3
BP	GO:0071825	protein-lipid complex subunit organization	3/40	48/18903	0.000142119	0.00316135	0.00205449	APOC3/APOA1/PLA2G2A	3
BP	GO:1901617	organic hydroxy compound biosynthetic process	5/40	245/18903	0.000159522	0.00347133	0.00225594	SLC27A5/AKR1D1/APOA1/PCK1/CYP3A4	5
BP	GO:0005996	monosaccharide metabolic process	5/40	248/18903	0.000168831	0.00356303	0.00231553	GNMT/FBP1/ALDOB/PCK1/SDS	5
BP	GO:0006639	acylglycerol metabolic process	4/40	132/18903	0.000170855	0.00356303	0.00231553	SLC27A5/APOC3/APOA1/PCK1	4
BP	GO:0006638	neutral lipid metabolic process	4/40	133/18903	0.000175885	0.00359308	0.00233506	SLC27A5/APOC3/APOA1/PCK1	4
BP	GO:0030388	fructose 1,6-bisphosphate metabolic process	2/40	10/18903	0.000194375	0.00389139	0.00252892	FBP1/ALDOB	2
BP	GO:0008203	cholesterol metabolic process	4/40	139/18903	0.000208343	0.00408924	0.0026575	AKR1D1/APOF/APOA1/CYP3A4	4
BP	GO:1902652	secondary alcohol metabolic process	4/40	149/18903	0.000271732	0.00508223	0.00330282	AKR1D1/APOF/APOA1/CYP3A4	4
BP	GO:0009410	response to xenobiotic stimulus	6/40	432/18903	0.000273392	0.00508223	0.00330282	FBP1/SLC22A7/SLC10A1/CYP2A6/CYP2C8/CYP3A4	6
BP	GO:0034370	triglyceride-rich lipoprotein particle remodeling	2/40	12/18903	0.000284321	0.00508223	0.00330282	APOC3/APOA1	2
BP	GO:0034372	very-low-density lipoprotein particle remodeling	2/40	12/18903	0.000284321	0.00508223	0.00330282	APOC3/APOA1	2
BP	GO:0071635	negative regulation of transforming growth factor beta production	2/40	12/18903	0.000284321	0.00508223	0.00330282	LAPTM4B/CD24	2
BP	GO:0016125	sterol metabolic process	4/40	154/18903	0.000308144	0.00541145	0.00351677	AKR1D1/APOF/APOA1/CYP3A4	4
BP	GO:0033700	phospholipid efflux	2/40	13/18903	0.000335566	0.00569324	0.0036999	APOC3/APOA1	2
BP	GO:1904478	regulation of intestinal absorption	2/40	13/18903	0.000335566	0.00569324	0.0036999	APOA1/HAMP	2
BP	GO:0006000	fructose metabolic process	2/40	14/18903	0.000390969	0.00621708	0.00404034	FBP1/ALDOB	2
BP	GO:0006563	L-serine metabolic process	2/40	14/18903	0.000390969	0.00621708	0.00404034	AGXT/SDS	2
BP	GO:0010896	regulation of triglyceride catabolic process	2/40	14/18903	0.000390969	0.00621708	0.00404034	APOC3/APOA1	2
BP	GO:0006633	fatty acid biosynthetic process	4/40	164/18903	0.000391285	0.00621708	0.00404034	APOC3/APOA1/CYP2C8/CYP3A4	4
BP	GO:0006570	tyrosine metabolic process	2/40	15/18903	0.000450515	0.00673082	0.0043742	TAT/HPD	2
BP	GO:0009071	serine family amino acid catabolic process	2/40	15/18903	0.000450515	0.00673082	0.0043742	AGXT/SDS	2
BP	GO:0032488	Cdc42 protein signal transduction	2/40	15/18903	0.000450515	0.00673082	0.0043742	APOC3/APOA1	2
BP	GO:0034384	high-density lipoprotein particle clearance	2/40	15/18903	0.000450515	0.00673082	0.0043742	APOC3/APOA1	2
BP	GO:0009074	aromatic amino acid family catabolic process	2/40	16/18903	0.000514185	0.00745941	0.00484769	TAT/HPD	2
BP	GO:0034375	high-density lipoprotein particle remodeling	2/40	16/18903	0.000514185	0.00745941	0.00484769	APOC3/APOA1	2
BP	GO:0006694	steroid biosynthetic process	4/40	178/18903	0.000533122	0.00762364	0.00495443	SLC27A5/AKR1D1/APOA1/CYP3A4	4
BP	GO:0048771	tissue remodeling	4/40	179/18903	0.00054448	0.0076764	0.00498871	SPP1/HRG/SPP2/HAMP	4
BP	GO:0006006	glucose metabolic process	4/40	188/18903	0.000654591	0.00910063	0.00591428	GNMT/FBP1/PCK1/SDS	4
BP	GO:0019373	epoxygenase P450 pathway	2/40	19/18903	0.000729777	0.00987171	0.00641539	CYP2A6/CYP2C8	2
BP	GO:0070989	oxidative demethylation	2/40	19/18903	0.000729777	0.00987171	0.00641539	CYP2C8/CYP3A4	2
BP	GO:0097006	regulation of plasma lipoprotein particle levels	3/40	84/18903	0.000742737	0.00991306	0.00644226	APOC3/APOA1/PLA2G2A	3
BP	GO:0034103	regulation of tissue remodeling	3/40	85/18903	0.000768785	0.0101257	0.00658046	SPP1/HRG/HAMP	3
BP	GO:0043691	reverse cholesterol transport	2/40	20/18903	0.000809779	0.0103922	0.00675362	APOC3/APOA1	2
BP	GO:0051004	regulation of lipoprotein lipase activity	2/40	20/18903	0.000809779	0.0103922	0.00675362	APOC3/APOA1	2
BP	GO:0046849	bone remodeling	3/40	89/18903	0.00087878	0.0111349	0.00723632	SPP1/SPP2/HAMP	3
BP	GO:1901654	response to ketone	4/40	205/18903	0.000904288	0.0113149	0.00735329	FBP1/SPP1/PCK1/TAT	4
BP	GO:0016051	carbohydrate biosynthetic process	4/40	212/18903	0.00102434	0.0126588	0.00822667	GNMT/FBP1/PCK1/SDS	4
BP	GO:0030258	lipid modification	4/40	213/18903	0.00104236	0.0127244	0.00826931	APOA1/HAO2/CYP2C8/CYP3A4	4
BP	GO:0043648	dicarboxylic acid metabolic process	3/40	95/18903	0.00106173	0.0127889	0.00831123	FTCD/PCK1/TAT	3
BP	GO:0015711	organic anion transport	5/40	372/18903	0.0010732	0.0127889	0.00831123	SLC27A5/AGXT/SLC22A7/SLC10A1/PLA2G2A	5
BP	GO:0042632	cholesterol homeostasis	3/40	100/18903	0.00123131	0.0145005	0.00942352	APOC3/APOA1/CD24	3
BP	GO:0055092	sterol homeostasis	3/40	101/18903	0.00126715	0.0146857	0.00954391	APOC3/APOA1/CD24	3
BP	GO:0007596	blood coagulation	4/40	225/18903	0.00127638	0.0146857	0.00954391	HGFAC/HRG/F9/SAA1	4
BP	GO:0034377	plasma lipoprotein particle assembly	2/40	26/18903	0.00137408	0.0155656	0.0101157	APOC3/APOA1	2
BP	GO:0050817	coagulation	4/40	230/18903	0.00138396	0.0155656	0.0101157	HGFAC/HRG/F9/SAA1	4
BP	GO:0007599	hemostasis	4/40	231/18903	0.00140621	0.0155879	0.0101302	HGFAC/HRG/F9/SAA1	4
BP	GO:1901655	cellular response to ketone	3/40	105/18903	0.00141708	0.0155879	0.0101302	FBP1/SPP1/PCK1	3
BP	GO:0046486	glycerolipid metabolic process	5/40	399/18903	0.00146398	0.0159287	0.0103517	SLC27A5/APOC3/APOA1/PCK1/PLA2G2A	5
BP	GO:0042759	long-chain fatty acid biosynthetic process	2/40	29/18903	0.00170967	0.0182061	0.0118317	CYP2C8/CYP3A4	2
BP	GO:0065005	protein-lipid complex assembly	2/40	29/18903	0.00170967	0.0182061	0.0118317	APOC3/APOA1	2
BP	GO:0002526	acute inflammatory response	3/40	114/18903	0.00179402	0.0189033	0.0122848	SAA4/SAA1/HAMP	3
BP	GO:0009072	aromatic amino acid family metabolic process	2/40	30/18903	0.00182934	0.0190747	0.0123962	TAT/HPD	2
BP	GO:0015721	bile acid and bile salt transport	2/40	31/18903	0.00195289	0.0199474	0.0129633	SLC27A5/SLC10A1	2
BP	GO:0019433	triglyceride catabolic process	2/40	31/18903	0.00195289	0.0199474	0.0129633	APOC3/APOA1	2
BP	GO:0015718	monocarboxylic acid transport	3/40	119/18903	0.00202802	0.0205055	0.013326	SLC27A5/SLC10A1/PLA2G2A	3
BP	GO:0032102	negative regulation of response to external stimulus	5/40	436/18903	0.00215897	0.0216113	0.0140447	SPP1/HRG/APOA1/SAA1/HAMP	5
BP	GO:0000096	sulfur amino acid metabolic process	2/40	33/18903	0.00221156	0.0219185	0.0142443	GNMT/AGXT	2
BP	GO:0006536	glutamate metabolic process	2/40	34/18903	0.00234664	0.0230293	0.0149662	FTCD/TAT	2
BP	GO:0072329	monocarboxylic acid catabolic process	3/40	126/18903	0.00238629	0.023191	0.0150713	AGXT/AKR1D1/PCK1	3
BP	GO:0006699	bile acid biosynthetic process	2/40	36/18903	0.00262824	0.0252968	0.0164398	SLC27A5/AKR1D1	2
BP	GO:0008210	estrogen metabolic process	2/40	39/18903	0.00307895	0.0289809	0.018834	CYP2C8/CYP3A4	2
BP	GO:0071634	regulation of transforming growth factor beta production	2/40	39/18903	0.00307895	0.0289809	0.018834	LAPTM4B/CD24	2
BP	GO:0031667	response to nutrient levels	5/40	474/18903	0.00309786	0.0289809	0.018834	SPP1/PCK1/SLC10A1/GCGR/HAMP	5
BP	GO:0007586	digestion	3/40	139/18903	0.00315067	0.029202	0.0189777	AKR1D1/APOA1/HAMP	3
BP	GO:0046942	carboxylic acid transport	4/40	290/18903	0.00321122	0.0294902	0.019165	SLC27A5/AGXT/SLC10A1/PLA2G2A	4
BP	GO:0045785	positive regulation of cell adhesion	5/40	484/18903	0.0033876	0.0297055	0.0193049	HRG/APOA1/PCK1/CD24/SAA1	5
BP	GO:0009069	serine family amino acid metabolic process	2/40	41/18903	0.00339812	0.0297055	0.0193049	AGXT/SDS	2
BP	GO:0045124	regulation of bone resorption	2/40	41/18903	0.00339812	0.0297055	0.0193049	SPP1/HAMP	2
BP	GO:0046461	neutral lipid catabolic process	2/40	41/18903	0.00339812	0.0297055	0.0193049	APOC3/APOA1	2
BP	GO:0046464	acylglycerol catabolic process	2/40	41/18903	0.00339812	0.0297055	0.0193049	APOC3/APOA1	2
BP	GO:0046165	alcohol biosynthetic process	3/40	143/18903	0.00341272	0.0297055	0.0193049	APOA1/PCK1/CYP3A4	3
BP	GO:0044262	cellular carbohydrate metabolic process	4/40	296/18903	0.00345527	0.0297236	0.0193167	GNMT/FBP1/PCK1/GCGR	4
BP	GO:0050892	intestinal absorption	2/40	42/18903	0.00356327	0.0297236	0.0193167	APOA1/HAMP	2
BP	GO:0055090	acylglycerol homeostasis	2/40	42/18903	0.00356327	0.0297236	0.0193167	APOC3/APOA1	2
BP	GO:0070328	triglyceride homeostasis	2/40	42/18903	0.00356327	0.0297236	0.0193167	APOC3/APOA1	2
BP	GO:0071604	transforming growth factor beta production	2/40	42/18903	0.00356327	0.0297236	0.0193167	LAPTM4B/CD24	2
BP	GO:0071548	response to dexamethasone	2/40	43/18903	0.0037321	0.0306216	0.0199003	PCK1/TAT	2
BP	GO:0090207	regulation of triglyceride metabolic process	2/40	43/18903	0.0037321	0.0306216	0.0199003	APOC3/APOA1	2
BP	GO:0044058	regulation of digestive system process	2/40	44/18903	0.00390461	0.0317765	0.0206508	APOA1/HAMP	2
BP	GO:0007584	response to nutrient	3/40	154/18903	0.00420101	0.033913	0.0220392	SPP1/GCGR/HAMP	3
BP	GO:0010675	regulation of cellular carbohydrate metabolic process	3/40	155/18903	0.00427769	0.0339839	0.0220853	GNMT/FBP1/GCGR	3
BP	GO:0032368	regulation of lipid transport	3/40	155/18903	0.00427769	0.0339839	0.0220853	SPP1/APOC3/APOA1	3
BP	GO:0051180	vitamin transport	2/40	47/18903	0.00444401	0.0350272	0.0227633	AFM/APOA1	2
BP	GO:0009066	aspartate family amino acid metabolic process	2/40	48/18903	0.00463104	0.035659	0.023174	GNMT/SDS	2
BP	GO:0046717	acid secretion	2/40	48/18903	0.00463104	0.035659	0.023174	AGXT/SLC10A1	2
BP	GO:0046850	regulation of bone remodeling	2/40	48/18903	0.00463104	0.035659	0.023174	SPP1/HAMP	2
BP	GO:0015849	organic acid transport	4/40	324/18903	0.00476272	0.036393	0.023651	SLC27A5/AGXT/SLC10A1/PLA2G2A	4
BP	GO:0008206	bile acid metabolic process	2/40	49/18903	0.00482168	0.0365644	0.0237623	SLC27A5/AKR1D1	2
BP	GO:0042304	regulation of fatty acid biosynthetic process	2/40	50/18903	0.00501589	0.0377512	0.0245336	APOC3/APOA1	2
BP	GO:0062012	regulation of small molecule metabolic process	4/40	339/18903	0.00558443	0.0413638	0.0268813	GNMT/FBP1/APOC3/APOA1	4
BP	GO:0006111	regulation of gluconeogenesis	2/40	53/18903	0.00561985	0.0413638	0.0268813	GNMT/FBP1	2
BP	GO:0034381	plasma lipoprotein particle clearance	2/40	53/18903	0.00561985	0.0413638	0.0268813	APOC3/APOA1	2
BP	GO:0055088	lipid homeostasis	3/40	174/18903	0.00589904	0.0431018	0.0280108	APOC3/APOA1/CD24	3
BP	GO:0050832	defense response to fungus	2/40	56/18903	0.00625548	0.0453749	0.0294881	HRG/HAMP	2
BP	GO:0046890	regulation of lipid biosynthetic process	3/40	182/18903	0.00667773	0.0475413	0.030896	APOC3/APOA1/PCK1	3
BP	GO:0006826	iron ion transport	2/40	58/18903	0.00669663	0.0475413	0.030896	HRG/HAMP	2
BP	GO:0019369	arachidonic acid metabolic process	2/40	58/18903	0.00669663	0.0475413	0.030896	CYP2A6/CYP2C8	2
BP	GO:0050728	negative regulation of inflammatory response	3/40	184/18903	0.00688152	0.0485098	0.0315254	APOA1/SAA1/HAMP	3
BP	GO:1905952	regulation of lipid localization	3/40	185/18903	0.00698479	0.0488935	0.0317748	SPP1/APOC3/APOA1	3
BP	GO:0006109	regulation of carbohydrate metabolic process	3/40	186/18903	0.00708899	0.0492783	0.0320248	GNMT/FBP1/GCGR	3
BP	GO:0019748	secondary metabolic process	2/40	60/18903	0.00715155	0.0493703	0.0320846	CYP2A6/CYP3A4	2
BP	GO:0030308	negative regulation of cell growth	3/40	188/18903	0.00730015	0.050051	0.032527	FBP1/SPP1/HRG	3
BP	GO:0051346	negative regulation of hydrolase activity	4/40	373/18903	0.00778757	0.0521017	0.0338597	APOC3/HRG/APOA1/SPP2	4
BP	GO:0046578	regulation of Ras protein signal transduction	3/40	193/18903	0.00784435	0.0521017	0.0338597	FBP1/APOC3/APOA1	3
BP	GO:0045453	bone resorption	2/40	63/18903	0.0078595	0.0521017	0.0338597	SPP1/HAMP	2
BP	GO:0046173	polyol biosynthetic process	2/40	63/18903	0.0078595	0.0521017	0.0338597	PCK1/CYP3A4	2
BP	GO:0050994	regulation of lipid catabolic process	2/40	63/18903	0.0078595	0.0521017	0.0338597	APOC3/APOA1	2
BP	GO:0009620	response to fungus	2/40	67/18903	0.00885056	0.0575286	0.0373865	HRG/HAMP	2
BP	GO:0015909	long-chain fatty acid transport	2/40	67/18903	0.00885056	0.0575286	0.0373865	SLC27A5/PLA2G2A	2
BP	GO:0031638	zymogen activation	2/40	67/18903	0.00885056	0.0575286	0.0373865	HGFAC/F9	2
BP	GO:0050878	regulation of body fluid levels	4/40	390/18903	0.00907781	0.0584343	0.0379751	HGFAC/HRG/F9/SAA1	4
BP	GO:0046503	glycerolipid catabolic process	2/40	68/18903	0.00910664	0.0584343	0.0379751	APOC3/APOA1	2
BP	GO:0006081	cellular aldehyde metabolic process	2/40	70/18903	0.00962868	0.0613905	0.0398962	AGXT/ALDOB	2
BP	GO:0033344	cholesterol efflux	2/40	71/18903	0.00989461	0.0622925	0.0404824	APOC3/APOA1	2
BP	GO:1901607	alpha-amino acid biosynthetic process	2/40	71/18903	0.00989461	0.0622925	0.0404824	AGXT/SDS	2
BP	GO:0042594	response to starvation	3/40	211/18903	0.0099992	0.0625575	0.0406546	PCK1/GCGR/HAMP	3
BP	GO:0070988	demethylation	2/40	74/18903	0.0107119	0.0665999	0.0432817	CYP2C8/CYP3A4	2
BP	GO:0005977	glycogen metabolic process	2/40	75/18903	0.0109907	0.0679119	0.0441343	GNMT/GCGR	2
BP	GO:0050727	regulation of inflammatory response	4/40	414/18903	0.0111271	0.0683328	0.0444079	APOA1/SAA1/HAMP/PLA2G2A	4
BP	GO:0006073	cellular glucan metabolic process	2/40	76/18903	0.0112728	0.0683883	0.0444439	GNMT/GCGR	2
BP	GO:0044042	glucan metabolic process	2/40	76/18903	0.0112728	0.0683883	0.0444439	GNMT/GCGR	2
BP	GO:0044242	cellular lipid catabolic process	3/40	222/18903	0.0114698	0.0688667	0.0447548	APOC3/APOA1/PCK1	3
BP	GO:0046470	phosphatidylcholine metabolic process	2/40	77/18903	0.011558	0.0688667	0.0447548	APOA1/PLA2G2A	2
BP	GO:1901616	organic hydroxy compound catabolic process	2/40	77/18903	0.011558	0.0688667	0.0447548	AKR1D1/CYP3A4	2
BP	GO:0009064	glutamine family amino acid metabolic process	2/40	78/18903	0.0118465	0.0694942	0.0451627	FTCD/TAT	2
BP	GO:0034637	cellular carbohydrate biosynthetic process	2/40	78/18903	0.0118465	0.0694942	0.0451627	FBP1/PCK1	2
BP	GO:0001558	regulation of cell growth	4/40	422/18903	0.0118716	0.0694942	0.0451627	FBP1/SPP1/HRG/HAMP	4
BP	GO:0008652	cellular amino acid biosynthetic process	2/40	79/18903	0.012138	0.0706405	0.0459076	AGXT/SDS	2
BP	GO:0032371	regulation of sterol transport	2/40	81/18903	0.0127306	0.0732375	0.0475953	APOC3/APOA1	2
BP	GO:0032374	regulation of cholesterol transport	2/40	81/18903	0.0127306	0.0732375	0.0475953	APOC3/APOA1	2
BP	GO:0006096	glycolytic process	2/40	83/18903	0.0133356	0.0762796	0.0495723	FBP1/ALDOB	2
CC	GO:0034364	high-density lipoprotein particle	5/40	27/19869	1.9941e-09	1.41581e-07	9.02592e-08	SAA4/APOC3/APOF/APOA1/SAA1	5
CC	GO:0034358	plasma lipoprotein particle	5/40	36/19869	9.18967e-09	2.17489e-07	1.38651e-07	SAA4/APOC3/APOF/APOA1/SAA1	5
CC	GO:1990777	lipoprotein particle	5/40	36/19869	9.18967e-09	2.17489e-07	1.38651e-07	SAA4/APOC3/APOF/APOA1/SAA1	5
CC	GO:0032994	protein-lipid complex	5/40	39/19869	1.39731e-08	2.48023e-07	1.58117e-07	SAA4/APOC3/APOF/APOA1/SAA1	5
CC	GO:0042627	chylomicron	2/40	13/19869	0.000303947	0.00431604	0.00275152	APOC3/APOA1	2
CC	GO:0034361	very-low-density lipoprotein particle	2/40	20/19869	0.00073381	0.00744293	0.00474494	APOC3/APOA1	2
CC	GO:0034385	triglyceride-rich plasma lipoprotein particle	2/40	20/19869	0.00073381	0.00744293	0.00474494	APOC3/APOA1	2
CC	GO:0071682	endocytic vesicle lumen	2/40	23/19869	0.000973402	0.00863894	0.00550741	APOA1/SAA1	2
CC	GO:0009925	basal plasma membrane	4/40	254/19869	0.00166052	0.011972	0.00763226	SLC22A1/SLC27A5/SLC22A7/SLC10A1	4
CC	GO:0062023	collagen-containing extracellular matrix	5/40	433/19869	0.0016862	0.011972	0.00763226	APOC3/HRG/APOA1/F9/SPP2	5
CC	GO:0045178	basal part of cell	4/40	272/19869	0.00213104	0.0137549	0.00876889	SLC22A1/SLC27A5/SLC22A7/SLC10A1	4
CC	GO:0072562	blood microparticle	3/40	145/19869	0.00308668	0.0179636	0.011452	AFM/HRG/APOA1	3
CC	GO:0005788	endoplasmic reticulum lumen	4/40	312/19869	0.00349249	0.0179636	0.011452	SPP1/APOA1/F9/SPP2	4
CC	GO:0034774	secretory granule lumen	4/40	322/19869	0.00390793	0.0179636	0.011452	HRG/APOA1/SPP2/S100P	4
CC	GO:0060205	cytoplasmic vesicle lumen	4/40	325/19869	0.00403883	0.0179636	0.011452	HRG/APOA1/SPP2/S100P	4
CC	GO:0031983	vesicle lumen	4/40	327/19869	0.00412773	0.0179636	0.011452	HRG/APOA1/SPP2/S100P	4
CC	GO:0005782	peroxisomal matrix	2/40	50/19869	0.00455416	0.0179636	0.011452	AGXT/HAO2	2
CC	GO:0031907	microbody lumen	2/40	50/19869	0.00455416	0.0179636	0.011452	AGXT/HAO2	2
CC	GO:0016323	basolateral plasma membrane	3/40	229/19869	0.0109084	0.0407632	0.0259869	SLC22A1/SLC22A7/SLC10A1	3
CC	GO:0005881	cytoplasmic microtubule	2/40	102/19869	0.0179313	0.0636562	0.0405814	CYP2A6/SAA1	2
CC	GO:0045179	apical cortex	1/40	11/19869	0.0219289	0.0741407	0.0472654	HAMP	1
CC	GO:0034362	low-density lipoprotein particle	1/40	12/19869	0.0238991	0.0771288	0.0491703	APOF	1
MF	GO:0019842	vitamin binding	6/40	149/18432	7.7182e-07	0.00015282	9.26184e-05	GNMT/FTCD/AGXT/AFM/TAT/SDS	6
MF	GO:0005496	steroid binding	5/40	101/18432	2.52647e-06	0.00025012	0.000151588	AKR1D1/APOC3/APOF/APOA1/CYP3A4	5
MF	GO:0005319	lipid transporter activity	5/40	161/18432	2.45574e-05	0.00162079	0.000982296	SLC27A5/CFHR4/APOF/APOA1/SLC10A1	5
MF	GO:0004497	monooxygenase activity	4/40	104/18432	7.4763e-05	0.00291973	0.00176954	AKR1D1/CYP2A6/CYP2C8/CYP3A4	4
MF	GO:0008395	steroid hydroxylase activity	3/40	38/18432	7.57731e-05	0.00291973	0.00176954	CYP2A6/CYP2C8/CYP3A4	3
MF	GO:0016712	oxidoreductase activity, acting on paired donors, with incorporation or reduction of molecular oxygen, reduced flavin or flavoprotein as one donor, and incorporation of one atom of oxygen	3/40	40/18432	8.84768e-05	0.00291973	0.00176954	CYP2A6/CYP2C8/CYP3A4	3
MF	GO:0015485	cholesterol binding	3/40	51/18432	0.000183432	0.00329281	0.00199564	APOC3/APOF/APOA1	3
MF	GO:0008401	retinoic acid 4-hydroxylase activity	2/40	10/18432	0.00020438	0.00329281	0.00199564	CYP2C8/CYP3A4	2
MF	GO:0043177	organic acid binding	4/40	137/18432	0.000216887	0.00329281	0.00199564	GNMT/FTCD/AGXT/TAT	4
MF	GO:0016597	amino acid binding	3/40	54/18432	0.000217498	0.00329281	0.00199564	GNMT/AGXT/TAT	3
MF	GO:0016614	oxidoreductase activity, acting on CH-OH group of donors	4/40	138/18432	0.000223014	0.00329281	0.00199564	RDH16/AKR1D1/HAO2/ADH1B	4
MF	GO:0020037	heme binding	4/40	139/18432	0.000229264	0.00329281	0.00199564	HRG/CYP2A6/CYP2C8/CYP3A4	4
MF	GO:0030170	pyridoxal phosphate binding	3/40	55/18432	0.0002297	0.00329281	0.00199564	AGXT/TAT/SDS	3
MF	GO:0070279	vitamin B6 binding	3/40	56/18432	0.000242338	0.00329281	0.00199564	AGXT/TAT/SDS	3
MF	GO:0016725	oxidoreductase activity, acting on CH or CH2 groups	2/40	11/18432	0.000249455	0.00329281	0.00199564	CYP2C8/CYP3A4	2
MF	GO:0046906	tetrapyrrole binding	4/40	149/18432	0.000298902	0.00363718	0.00220435	HRG/CYP2A6/CYP2C8/CYP3A4	4
MF	GO:0032934	sterol binding	3/40	61/18432	0.000312283	0.00363718	0.00220435	APOC3/APOF/APOA1	3
MF	GO:0005542	folic acid binding	2/40	13/18432	0.000352802	0.00367657	0.00222822	GNMT/FTCD	2
MF	GO:0016840	carbon-nitrogen lyase activity	2/40	13/18432	0.000352802	0.00367657	0.00222822	FTCD/SDS	2
MF	GO:0031406	carboxylic acid binding	4/40	171/18432	0.000503686	0.0049865	0.00302212	GNMT/FTCD/AFM/PCK1	4
MF	GO:0016705	oxidoreductase activity, acting on paired donors, with incorporation or reduction of molecular oxygen	4/40	179/18432	0.000598226	0.00550595	0.00333694	AKR1D1/CYP2A6/CYP2C8/CYP3A4	4
MF	GO:0008392	arachidonic acid epoxygenase activity	2/40	17/18432	0.000611772	0.00550595	0.00333694	CYP2A6/CYP2C8	2
MF	GO:0004745	NAD-retinol dehydrogenase activity	2/40	19/18432	0.000767105	0.00660377	0.00400229	RDH16/ADH1B	2
MF	GO:0016829	lyase activity	4/40	199/18432	0.000888832	0.00733286	0.00444416	FTCD/ALDOB/PCK1/SDS	4
MF	GO:0008391	arachidonic acid monooxygenase activity	2/40	21/18432	0.000939476	0.00743232	0.00450443	CYP2A6/CYP2C8	2
MF	GO:0043178	alcohol binding	3/40	90/18432	0.000975961	0.00743232	0.00450443	APOC3/APOF/APOA1	3
MF	GO:0008483	transaminase activity	2/40	24/18432	0.00122967	0.00901757	0.0054652	AGXT/TAT	2
MF	GO:0016769	transferase activity, transferring nitrogenous groups	2/40	25/18432	0.00133476	0.00911322	0.00552316	AGXT/TAT	2
MF	GO:0070330	aromatase activity	2/40	25/18432	0.00133476	0.00911322	0.00552316	CYP2C8/CYP3A4	2
MF	GO:0070325	lipoprotein particle receptor binding	2/40	29/18432	0.0017965	0.011518	0.00698061	APOC3/APOA1	2
MF	GO:0033218	amide binding	5/40	408/18432	0.00180332	0.011518	0.00698061	LAPTM4B/GNMT/FTCD/APOA1/GCGR	5
MF	GO:0016616	oxidoreductase activity, acting on the CH-OH group of donors, NAD or NADP as acceptor	3/40	126/18432	0.00256216	0.0158534	0.00960812	RDH16/AKR1D1/ADH1B	3
MF	GO:0016229	steroid dehydrogenase activity	2/40	37/18432	0.00291485	0.0174891	0.0105995	RDH16/AKR1D1	2
MF	GO:0016709	oxidoreductase activity, acting on paired donors, with incorporation or reduction of molecular oxygen, NAD(P)H as one donor, and incorporation of one atom of oxygen	2/40	40/18432	0.0033998	0.0197988	0.0119993	AKR1D1/CYP3A4	2
MF	GO:0005506	iron ion binding	3/40	153/18432	0.00442479	0.0250317	0.0151707	CYP2A6/CYP2C8/CYP3A4	3
MF	GO:0016830	carbon-carbon lyase activity	2/40	51/18432	0.00547438	0.0301091	0.0182479	ALDOB/PCK1	2
MF	GO:1901618	organic hydroxy compound transmembrane transporter activity	2/40	53/18432	0.00590048	0.0315755	0.0191367	SLC22A1/SLC10A1	2
MF	GO:0008028	monocarboxylic acid transmembrane transporter activity	2/40	60/18432	0.00750689	0.0391148	0.023706	SLC27A5/SLC10A1	2
MF	GO:0048029	monosaccharide binding	2/40	72/18432	0.0106645	0.0541428	0.0328138	FBP1/ALDOB	2
MF	GO:0015370	solute:sodium symporter activity	2/40	76/18432	0.0118265	0.0585413	0.0354796	SLC22A1/SLC10A1	2
MF	GO:0015291	secondary active transmembrane transporter activity	3/40	246/18432	0.0161344	0.0779174	0.0472227	SLC22A1/SLC22A7/SLC10A1	3
