# Supplementary material for: Identification and characterization of a novel molecular classification based on disulfidptosis-related genes to predict prognosis and immunotherapy efficacy in hepatocellular carcinoma
Source: Aging (Albany NY). 2023 Jul 3;15(13):6135–51. doi: 10.18632/aging.204809 (PMC10373967; doi:10.18632/aging.204809)
Supplement: Supplementary Table 3 [file aging-15-204809-s004.xlsx]

## Sheet: Sheet1
Supplementary Table 3. KEGG analysis between the 2 clusters.
ID	Description	GeneRatio	BgRatio	pvalue	p.adjust	qvalue	geneID	Count
hsa00830	Retinol metabolism	2023-05-31	68/8292	4.60236e-06	0.00031296	0.000188939	RDH16/CYP2A6/ADH1B/CYP2C8/CYP3A4	5
hsa04976	Bile secretion	2023-05-31	89/8292	1.73439e-05	0.000589692	0.000356006	SLC22A1/SLC27A5/SLC22A7/SLC10A1/CYP3A4	5
hsa01200	Carbon metabolism	2023-05-31	115/8292	5.98998e-05	0.00135773	0.000819681	FBP1/AGXT/ALDOB/HAO2/SDS	5
hsa00010	Glycolysis / Gluconeogenesis	4/31	67/8292	0.000103954	0.00174293	0.00105224	FBP1/ALDOB/PCK1/ADH1B	4
hsa00982	Drug metabolism - cytochrome P450	4/31	72/8292	0.000137722	0.00174293	0.00105224	CYP2A6/ADH1B/CYP2C8/CYP3A4	4
hsa03320	PPAR signaling pathway	4/31	75/8292	0.000161442	0.00174293	0.00105224	SLC27A5/APOC3/APOA1/PCK1	4
hsa00591	Linoleic acid metabolism	2023-03-31	30/8292	0.00017942	0.00174293	0.00105224	CYP2C8/PLA2G2A/CYP3A4	3
hsa00350	Tyrosine metabolism	2023-03-31	36/8292	0.000310775	0.00264159	0.00159477	ADH1B/TAT/HPD	3
hsa00260	Glycine, serine and threonine metabolism	2023-03-31	40/8292	0.000425706	0.00321645	0.00194182	GNMT/AGXT/SDS	3
hsa00130	Ubiquinone and other terpenoid-quinone biosynthesis	2/31	11/8292	0.000728552	0.00495416	0.0029909	TAT/HPD	2
hsa00360	Phenylalanine metabolism	2/31	16/8292	0.00157116	0.00971263	0.00586366	TAT/HPD	2
hsa00120	Primary bile acid biosynthesis	2/31	17/8292	0.00177651	0.0100669	0.00607753	SLC27A5/AKR1D1	2
hsa05204	Chemical carcinogenesis - DNA adducts	2023-03-31	69/8292	0.00209803	0.0109743	0.00662536	CYP2A6/CYP2C8/CYP3A4	3
hsa00980	Metabolism of xenobiotics by cytochrome P450	2023-03-31	78/8292	0.00297795	0.0144643	0.00873234	CYP2A6/ADH1B/CYP3A4	3
hsa00030	Pentose phosphate pathway	2/31	30/8292	0.00551305	0.0234305	0.0141453	FBP1/ALDOB	2
hsa00630	Glyoxylate and dicarboxylate metabolism	2/31	30/8292	0.00551305	0.0234305	0.0141453	AGXT/HAO2	2
hsa00051	Fructose and mannose metabolism	2/31	33/8292	0.00664527	0.0265811	0.0160474	FBP1/ALDOB	2
hsa04922	Glucagon signaling pathway	2023-03-31	107/8292	0.00722232	0.0272843	0.016472	FBP1/PCK1/GCGR	3
hsa04975	Fat digestion and absorption	2/31	43/8292	0.0111045	0.0397426	0.0239932	APOA1/PLA2G2A	2
hsa00620	Pyruvate metabolism	2/31	47/8292	0.013171	0.0447813	0.0270352	PCK1/ADH1B	2
hsa00270	Cysteine and methionine metabolism	2/31	51/8292	0.0153917	0.0475743	0.0287213	TAT/SDS	2
hsa04979	Cholesterol metabolism	2/31	51/8292	0.0153917	0.0475743	0.0287213	APOC3/APOA1	2
hsa00590	Arachidonic acid metabolism	2/31	61/8292	0.0215874	0.0630574	0.0380687	CYP2C8/PLA2G2A	2
hsa00140	Steroid hormone biosynthesis	2/31	62/8292	0.0222556	0.0630574	0.0380687	AKR1D1/CYP3A4	2
