# Supplementary material for: Identification and characterization of a novel molecular classification based on disulfidptosis-related genes to predict prognosis and immunotherapy efficacy in hepatocellular carcinoma
Source: Aging (Albany NY). 2023 Jul 3;15(13):6135–51. doi: 10.18632/aging.204809 (PMC10373967; doi:10.18632/aging.204809)
Supplement: Supplementary Table 4 [file aging-15-204809-s005.xlsx]

## Sheet: Sheet1
Supplementary Table 4. The expression of immune checkpoint between 2 clusters.
ID	LAG3	CTLA4	TNFRSF9	ICOS	CD80	PDCD1LG2	CD70	TNFSF9	ICOSLG	KIR3DL1	CD86	PDCD1	LAIR1	TNFRSF8	TNFRSF14	CD40	TNFRSF4	TNFSF14	HHLA2	CD244	CD274	LGALS9	CD28	CD48	TNFRSF25	CD40LG	ADORA2A	CD160	CD44	TNFSF18	BTNL2	TNFSF4	CD200	NRP1
GSE14520_GSM362958	2.68118	2.72756	2.47805	2.36236	3.33656	3.28744	3.19201	4.40267	3.5882	2.51928	3.42506	3.20065	4.86454	2.82448	5.45429	4.79117	3.31593	6.15549	2.525	2.25924	2.40972	5.00014	2.82083	3.46818	3.09026	2.77657	3.06202	2.63114	6.78501	2.25376	2.35953	4.07169	3.41556	6.04072
GSE14520_GSM362959	3.03786	2.1061	2.76078	3.39212	2.88989	2.75529	3.2357	3.13426	3.66612	2.73444	3.99426	3.08551	6.18879	2.51966	7.09801	4.52201	3.75706	5.26101	2.43094	2.7363	5.15591	4.62085	3.11246	5.92384	3.32582	3.26548	3.18819	3.0399	5.25041	2.79221	2.69547	3.05937	3.35518	6.34399
GSE14520_GSM362960	3.00231	2.72121	2.35313	3.45524	2.85807	2.67582	3.6406	3.39712	4.25706	2.73034	3.79921	6.6565	4.79703	2.98752	5.93602	4.93198	4.02985	4.41247	2.9946	2.39555	6.09778	4.33974	2.8759	4.78889	3.36219	3.81207	3.15158	4.03918	3.86863	3.03802	2.52673	4.03706	3.28379	5.4945
GSE14520_GSM362964	2.94384	3.57161	3.38049	2.66169	3.21843	2.67037	3.51155	3.52508	3.95795	2.49237	4.4718	2.67605	5.19699	2.60115	6.58349	4.53516	3.32427	6.36923	3.39767	2.35164	3.84947	5.44343	3.06796	5.58976	3.35303	3.13544	3.20607	3.27698	4.39247	2.55602	2.97526	3.20559	3.2056	5.57542
GSE14520_GSM362965	2.40355	2.30297	2.26945	3.1785	2.70168	3.00996	3.23393	3.55997	3.19788	2.45987	4.08942	2.45234	8.03453	2.94739	7.14889	3.81084	4.03459	3.42097	2.99443	3.90002	3.68819	6.13358	3.00153	5.04333	4.53001	2.58332	3.09835	2.79786	5.80643	3.01462	2.27442	3.04236	3.30016	6.40449
GSE14520_GSM362970	2.98762	3.2764	2.03323	2.57116	2.97407	2.81553	3.66937	4.4513	4.03084	2.49423	3.35627	3.54511	5.40793	2.64327	6.94642	3.61856	4.53285	6.11038	2.65509	2.90712	3.63458	6.05279	3.00219	5.03915	3.60667	2.9698	3.92419	2.40107	3.70105	2.42827	2.42134	3.42733	3.26723	5.36807
GSE14520_GSM362982	3.94792	3.19624	2.69892	2.55997	3.04044	3.00376	3.53552	4.51841	3.54117	2.6221	3.96169	2.55282	5.11638	2.84843	6.59617	4.72088	3.9753	2.89952	2.55177	3.0441	3.62501	5.07628	3.14482	3.98883	5.20445	2.99156	3.49826	2.85191	4.02177	2.63812	2.60904	3.92854	3.66382	5.15002
GSE14520_GSM362983	4.12012	2.78127	2.15368	2.54035	2.92294	3.70797	3.09416	2.66013	3.17198	2.58005	3.25172	2.79468	4.95836	2.84147	6.07225	4.91167	3.93756	8.00039	2.49356	2.3341	4.04098	3.35339	2.73307	2.86325	4.10069	2.44004	3.63939	2.97321	4.84966	2.60429	2.34646	3.31022	2.82345	5.25816
GSE14520_GSM362987	2.66298	3.08419	2.75919	2.76762	3.19561	3.21973	3.58752	2.69102	3.73199	2.6692	4.06161	3.51484	5.95407	2.78204	6.52963	4.98306	4.13806	4.13163	2.73735	2.88895	4.28983	4.52145	3.10531	3.6753	3.95563	2.80936	3.12867	3.32519	7.31311	3.50647	2.53351	3.49218	3.31949	6.40062
GSE14520_GSM362988	3.54979	3.03795	1.98218	2.23701	2.75247	3.2304	2.94303	2.88021	3.20773	2.7747	2.87244	2.89372	5.498	2.77762	6.27125	4.20935	3.5258	5.18567	2.37048	2.50376	3.88748	4.50233	3.23108	3.3568	3.59353	2.30494	3.57941	2.87282	4.53459	2.59127	2.3745	3.80793	3.44703	5.07336
GSE14520_GSM362992	3.52567	2.85614	2.0525	2.82964	3.11646	2.95991	3.39596	2.78634	3.3996	2.62439	3.1739	2.99359	4.95157	2.87541	7.108	3.94855	4.17622	5.99159	2.92776	3.31992	4.02462	4.26703	2.92601	3.47476	3.36621	2.78829	3.36058	3.37292	3.25465	2.41763	2.46276	3.07564	3.32897	4.70048
GSE14520_GSM363010	2.94887	3.3034	3.91773	2.75156	2.99756	3.73672	1.87323	2.54286	4.19943	2.57863	4.31254	1.99871	6.7713	2.18717	6.85668	4.29303	3.46009	4.07947	2.96604	2.18521	2.09267	4.87075	3.92135	4.53498	3.73777	2.52265	3.08821	2.63147	4.76611	3.74084	2.37154	2.72022	3.64719	6.16213
GSE14520_GSM363013	3.30926	2.50212	3.31666	3.51299	3.08594	2.61132	2.93243	2.70123	3.31495	2.35277	4.17941	3.38443	5.53381	2.59624	6.70252	4.49335	3.66847	3.91339	2.60582	2.46961	4.8748	5.47149	2.93703	6.09643	4.56057	3.31548	3.56711	2.52654	5.84964	2.76141	2.6123	3.12143	3.68047	5.53282
GSE14520_GSM363017	2.6855	2.63485	2.81294	2.73412	2.58937	2.22578	1.96189	2.86719	3.19743	2.41422	4.68793	2.67016	6.37241	2.70252	6.59128	5.77047	3.26868	3.62876	2.43065	2.16251	2.83983	6.1782	3.00108	4.59741	3.62036	2.89397	3.63414	2.46045	5.83132	2.66199	2.42457	3.17003	3.77526	6.65426
GSE14520_GSM363032	3.49311	3.01001	2.56611	3.86484	3.3286	2.9344	3.29996	2.63344	3.61976	2.41377	4.55407	3.45155	4.81549	3.09502	5.73714	4.68271	4.07871	6.91301	3.7229	2.52616	4.3655	4.43874	2.9309	5.67911	3.16856	3.1326	3.01855	2.05193	5.31099	2.65333	2.48312	3.49445	3.18461	6.24013
GSE14520_GSM363033	2.84485	3.37214	3.54311	2.83122	3.25199	3.3859	2.62306	3.26792	3.63684	2.49388	3.728	2.5889	4.93411	3.03666	6.12345	5.16716	3.97261	7.16986	2.81803	2.62965	3.0039	5.20121	3.26618	6.58085	3.48441	2.74534	3.64789	2.72768	4.70295	2.29538	2.3752	5.85865	3.45811	5.78786
GSE14520_GSM363037	3.47751	2.67305	3.08265	3.2401	3.14168	2.519	3.13527	3.23808	3.06828	2.60121	3.6847	3.88826	4.47607	3.08736	6.76466	5.09066	3.84947	6.09526	2.71569	2.5566	3.00455	5.15795	3.04932	3.67555	3.96783	2.92092	3.35841	2.46956	4.01079	2.68499	2.40244	2.97811	3.17458	5.12931
GSE14520_GSM363048	3.60097	3.82243	2.81083	2.73121	2.79159	2.86881	2.82559	2.87468	3.12539	2.52815	3.52339	2.5304	4.7978	2.8151	7.05087	4.01194	3.93663	4.99856	2.66607	2.50376	2.29979	4.29563	2.86408	3.56679	2.884	2.75457	3.59327	2.28337	4.0649	2.74341	2.41098	3.1379	3.53601	5.0114
GSE14520_GSM363051	3.54189	3.57547	2.63786	2.71376	4.32582	3.19469	3.56467	2.26643	4.59048	2.77521	3.97435	1.89195	6.16176	2.92474	6.25808	5.22355	2.99718	6.9859	3.98107	2.05295	2.51991	3.51385	4.66082	4.61453	3.08906	2.27984	3.25449	2.73217	5.31008	2.81627	2.40204	4.31149	3.90503	5.33979
GSE14520_GSM363052	3.31685	2.8545	3.10185	3.75213	4.33271	2.05167	2.99772	2.8966	3.35518	2.42311	4.13479	3.89246	6.75319	2.46532	6.01081	5.08654	3.64893	6.95079	2.8655	2.77757	3.40661	7.70338	3.90903	3.92993	6.06697	2.60417	3.08048	2.65473	5.82248	2.77493	2.37699	2.59664	3.76245	6.37363
GSE14520_GSM363054	3.97766	3.28225	3.22817	3.29099	2.9632	2.50505	3.45284	3.13573	4.21472	2.61357	5.10715	3.73172	5.19409	2.72714	6.17215	5.35766	4.0688	4.76886	2.45188	3.26325	4.56758	4.57774	2.98205	4.02041	3.88478	2.74572	3.55371	2.95607	4.93734	2.55001	2.54026	2.67565	3.24813	6.55486
GSE14520_GSM363057	3.07355	2.32538	4.95825	3.39025	2.84524	2.72723	2.5522	2.26567	3.15238	2.60337	3.45629	2.63557	4.75844	2.59375	6.81259	3.2917	4.09791	7.35624	2.62578	2.27453	3.19642	4.15624	3.05627	3.60132	3.48197	3.2596	3.11037	2.6552	5.25436	3.09488	2.40237	3.3493	3.21087	5.88178
GSE14520_GSM363070	4.75882	2.33973	3.18957	2.69655	3.06375	2.31483	2.90422	3.07894	3.11823	2.64401	3.54148	2.62742	5.18594	2.48336	5.35713	4.35669	2.79094	8.04884	3.08124	2.8376	4.09643	4.17759	2.97479	4.44386	4.17612	2.92541	3.40382	2.85903	4.67717	2.56195	2.35619	3.01918	3.17057	3.57143
GSE14520_GSM363071	2.75079	2.62139	2.49164	2.95967	2.69337	3.65011	2.73183	2.41243	3.36188	2.61188	3.19647	2.48179	5.64193	3.41437	4.76598	5.30323	4.19302	5.24778	2.44464	2.88527	3.49322	5.08573	3.38804	3.6841	4.60279	2.38892	3.38363	2.18745	4.25816	2.56399	2.39953	3.07736	3.5124	5.11795
GSE14520_GSM363073	3.7103	3.27275	3.30764	3.38135	4.01907	3.32531	1.38703	2.78611	3.91785	2.71984	3.69921	3.08748	7.87344	4.28104	5.8778	4.39749	2.43192	6.30592	2.84381	1.87476	2.89057	4.066	5.64793	4.47171	3.42919	2.28131	2.95219	2.91891	5.06926	3.89445	2.46759	2.75806	3.4994	4.33557
GSE14520_GSM363075	2.72886	2.49899	3.06718	3.21488	3.14782	3.59795	2.4686	2.43252	3.32401	2.45069	3.64345	2.68432	5.365	2.46626	5.76487	4.69167	3.71859	5.21119	2.89987	2.67119	3.06503	3.94004	2.97557	4.41089	3.71684	2.97918	3.50051	2.67542	4.82317	2.30622	2.49132	3.22635	3.17902	6.00134
GSE14520_GSM363076	3.80097	3.20881	3.20146	3.12013	2.78942	6.8477	3.05074	4.12049	4.33132	2.61679	4.31945	1.77305	7.13736	3.48721	6.05826	5.58496	3.07268	6.60709	3.77328	2.38241	2.0622	3.55902	7.17331	4.2863	5.12017	2.69574	3.01414	3.50286	4.43241	2.95255	2.49352	3.33779	2.77217	3.38096
GSE14520_GSM363078	3.37091	3.84879	3.29168	3.38853	2.51177	3.14744	3.43858	2.63764	3.30727	2.42967	4.41278	2.92254	6.14245	2.45089	6.84801	5.10883	4.4033	3.15332	2.7914	2.90767	4.34771	4.36258	4.03852	5.25193	3.29995	3.10754	3.83089	2.86412	6.67037	2.8368	2.69394	3.13209	3.59456	7.51495
GSE14520_GSM363079	3.99386	2.36819	2.56202	2.64678	2.85574	3.35728	3.07851	2.82884	3.04567	2.71115	2.97213	2.90134	4.52364	2.7065	8.58822	5.50671	3.83913	3.14783	2.23546	2.76444	3.33305	4.70838	3.06063	3.27501	3.76925	2.52149	3.53281	2.80618	3.90011	2.56492	2.43396	5.8073	3.48472	6.60255
GSE14520_GSM363080	2.87598	2.87512	2.56683	3.17153	2.51801	4.10467	3.15067	2.37695	4.01081	2.60296	4.25017	2.27798	5.19583	2.95195	7.26034	4.55938	4.10646	4.87887	2.52831	3.32188	3.48589	5.10517	3.5691	5.50807	5.03899	1.99882	3.52306	2.70449	5.9434	2.69938	2.28112	5.2436	3.30057	6.5248
GSE14520_GSM363081	3.2426	2.61796	2.60936	3.12414	2.62191	3.60555	4.0293	3.05358	2.9906	2.46637	4.57505	2.92278	8.47185	2.36727	6.71657	4.57118	3.86716	3.07898	2.75186	3.00656	4.15813	7.97729	3.1332	3.38418	3.83693	2.21266	3.11667	2.82107	5.14079	2.93118	2.60808	3.94345	3.05352	6.65335
GSE14520_GSM363083	5.03637	3.2548	3.77037	2.9325	2.39734	2.48982	3.13787	2.83681	2.93486	2.79344	4.02297	2.87467	5.27544	2.75059	6.70797	5.21624	4.50926	5.62865	2.78902	3.13273	3.84382	5.41244	3.07685	4.79499	4.90579	2.8242	3.52154	2.67126	4.95608	3.06687	2.39563	4.19473	3.55148	6.32157
GSE14520_GSM363084	2.28733	2.53188	3.1786	3.05906	2.84553	2.23431	3.35883	3.16222	3.58845	2.76337	2.96652	2.96536	4.77196	2.77456	6.70517	5.94607	4.59492	8.13967	2.93997	2.2902	3.7428	4.22203	2.94687	3.64742	3.77752	2.93664	3.70733	2.71025	4.08566	2.36893	2.4855	3.17106	3.57552	4.82001
GSE14520_GSM363085	2.96626	3.24941	3.31178	3.22782	2.92543	2.59963	3.29844	2.50277	3.17934	2.59911	3.61163	3.93177	4.88245	2.52693	6.14102	5.71383	3.99596	4.75975	2.57086	3.52556	4.1397	4.3507	3.16511	4.83798	4.13356	2.67626	3.81741	2.88857	3.82683	2.33178	2.49873	6.45015	3.28009	6.55046
GSE14520_GSM363086	2.61247	3.13861	2.51857	2.8998	2.89213	2.49977	3.03421	2.02713	3.28155	2.67641	2.86355	2.77403	4.35263	2.4323	6.1047	5.09299	3.89085	4.29839	2.39068	2.35394	3.63994	4.20585	2.81739	3.5314	3.31139	2.72585	3.41737	2.82034	3.5693	2.47435	2.54273	3.92051	3.38936	4.98524
GSE14520_GSM363087	5.82157	2.8596	3.51706	2.97469	2.55278	3.40309	3.27856	2.37308	3.93942	2.84285	3.60408	2.38356	4.505	2.58042	4.49327	4.63926	2.68718	5.3452	2.06542	2.88126	2.33568	5.09816	3.10977	4.44243	3.3546	1.91082	4.13299	3.36645	5.18833	2.33745	2.56835	3.96492	3.74562	5.04136
GSE14520_GSM363100	4.65487	2.8644	2.15069	2.66998	2.53066	3.27137	2.40663	2.48195	3.05295	2.73824	3.27051	3.58068	4.48175	2.51374	5.55928	5.55916	4.26947	5.28282	2.32603	2.74192	2.53053	5.36101	2.81377	3.0706	3.44254	2.54435	3.82776	2.55999	3.81952	2.41323	2.32847	4.52373	3.22072	6.3348
GSE14520_GSM363102	4.0117	2.66253	2.89577	2.63045	2.58924	2.59047	3.32609	2.83828	3.26773	2.76927	3.34045	3.1451	5.09973	2.96482	6.36687	6.07243	4.39009	2.81399	3.02188	3.61515	4.737	5.47759	2.83383	3.76859	4.11758	2.78324	2.91119	2.67325	3.90284	2.62617	2.50569	3.37089	3.12121	5.31292
GSE14520_GSM363105	3.30821	2.63881	2.40963	3.12702	3.20807	2.46834	3.04595	3.04452	3.03694	2.60016	3.1215	2.84316	6.38734	2.6638	6.56508	4.72094	3.58107	4.27773	2.86997	2.93082	3.35483	5.29645	2.73077	3.46478	3.6698	2.10964	3.19176	2.69081	5.19426	2.60004	2.42488	3.57324	3.74122	5.88653
GSE14520_GSM363106	3.85262	2.45369	2.47043	2.66945	2.6582	2.55392	3.04321	3.9946	3.10128	2.64929	3.942	3.2443	4.97699	2.85177	6.97594	5.54959	4.00557	4.04422	2.78733	2.65907	3.44689	4.29209	3.43657	3.79696	3.42843	2.72196	3.2528	2.77329	4.39037	2.49221	2.51616	3.21442	3.02288	5.60909
GSE14520_GSM363107	3.44253	2.38873	2.76263	2.76268	3.1637	2.67037	3.13872	2.60386	3.12308	2.60676	3.56935	4.66974	4.42003	2.54197	6.22608	3.46561	3.66912	4.74438	2.62004	2.97443	3.38952	4.47899	2.64922	4.27105	3.5684	3.10712	3.42443	2.99413	4.0572	2.43219	2.47231	3.38482	3.0844	5.62615
GSE14520_GSM363109	4.95552	2.83204	2.50904	2.57938	2.86549	2.89358	3.01694	3.37859	3.85574	2.50502	4.10969	3.4453	6.20866	2.60419	6.53843	5.42153	3.66912	5.88086	2.62754	3.12267	3.71644	5.4991	3.1037	3.25568	3.89869	2.22031	3.34869	2.6853	7.58565	2.54548	2.40372	3.02529	3.01125	6.07996
GSE14520_GSM363122	3.51664	5.89252	3.04151	3.56377	3.30204	1.73691	4.35234	4.12464	4.43884	2.8652	3.1162	6.24359	3.86792	3.14664	6.72801	4.42134	5.23934	3.94259	2.01441	2.63015	1.92965	3.38867	3.39835	2.90775	2.73615	1.93063	4.7327	2.33998	3.77402	3.14585	2.5138	2.44992	4.23	4.24622
GSE14520_GSM363123	3.86519	3.05872	2.84444	2.93087	3.21921	2.41555	3.17637	3.22866	4.06587	2.57037	3.42808	3.76801	4.70424	2.39667	5.85435	4.55755	4.30894	6.18717	2.58801	2.87046	3.67826	4.9903	2.98864	3.38557	3.60997	2.5767	3.23205	2.63595	3.73651	2.14097	2.5038	3.27646	3.13252	3.97625
GSE14520_GSM363126	3.06775	2.97912	2.95977	3.23922	2.65339	2.53341	3.59759	3.59108	3.15867	2.79359	3.73657	2.20315	4.76316	2.62691	7.42924	5.40992	3.66272	8.27842	3.10644	2.73378	4.17595	4.63398	3.06568	3.69174	3.31559	2.32294	3.23738	3.29963	4.1883	2.21743	2.39363	4.69553	3.27586	5.46918
GSE14520_GSM363127	3.14595	2.92809	2.93759	2.95837	3.02461	2.33243	2.80649	2.47913	3.16938	2.57275	3.64633	3.28308	5.10083	2.80111	5.72683	4.57756	3.60218	6.12646	3.30111	2.60395	2.89878	3.93211	3.07188	3.58131	3.27718	2.83298	3.71217	2.82034	5.33183	2.57108	2.56644	4.51093	3.10293	5.53371
GSE14520_GSM363129	5.02997	3.1277	2.13001	2.64052	2.81358	2.86085	3.01369	2.79078	3.21723	2.74071	3.70139	2.08522	4.90328	2.78277	5.57135	5.22003	3.8189	5.47372	2.23084	2.79403	3.12496	4.1989	2.88231	3.28965	3.12952	2.24596	3.6265	2.78405	3.68184	2.57807	2.45139	6.2281	3.44027	5.24557
GSE14520_GSM363142	2.78543	3.33006	2.34463	2.96265	2.83186	1.87942	3.33462	3.57567	3.99148	2.81665	3.15436	5.19161	4.31128	2.41042	6.37518	4.5287	3.56141	6.65116	1.69973	3.21605	3.29983	4.97045	3.0162	3.77033	2.89134	2.82366	4.09355	2.70554	3.50556	3.35077	2.46802	3.49713	3.37663	5.80522
GSE14520_GSM363147	3.73189	2.70814	3.02676	2.70188	2.74177	2.22489	3.17352	3.12102	3.38979	2.77652	3.09947	3.24471	4.531	3.30422	6.51691	5.37413	3.9753	4.35638	2.53722	3.0062	3.16381	4.3448	2.81571	3.03385	3.35786	2.686	4.31506	2.6594	3.63958	2.29259	2.72637	4.27851	2.87627	6.51862
GSE14520_GSM363150	5.06138	2.91779	3.01333	3.10697	2.79945	2.69599	3.02176	2.72882	3.49854	2.66973	3.53907	2.62541	4.77699	2.97764	7.46791	4.69253	3.21611	3.22121	2.25948	3.07907	3.37255	5.1819	2.7209	3.81875	4.10222	3.09989	3.73298	2.67855	4.69927	2.29966	2.61417	5.37218	2.95123	5.06853
GSE14520_GSM363151	3.0644	3.52218	2.89011	2.9343	2.92253	2.49354	3.20676	2.87773	4.23734	2.76337	3.43227	2.70431	4.91833	2.91672	6.42108	5.61673	3.42636	8.21225	2.63225	2.99857	2.60717	3.9708	3.39764	2.8222	3.39883	2.40638	3.71863	2.7785	3.69799	2.84319	2.47364	2.98553	3.30547	5.47886
GSE14520_GSM363152	3.29273	2.7404	2.70838	2.49116	3.21396	2.70546	3.14558	3.01588	3.94881	2.69967	3.00937	3.39302	4.99134	2.41569	6.67645	3.45332	3.88533	3.82747	2.56853	3.31706	3.32485	4.16394	3.15399	3.0849	3.79961	2.71093	3.70661	2.79398	3.86181	2.59543	2.50604	3.19648	3.45152	5.74312
GSE14520_GSM363169	3.03572	2.29017	2.83989	2.37227	2.63048	2.79892	2.87811	2.63732	3.48167	2.61932	4.0999	3.69779	5.4113	2.67341	6.49855	3.68214	3.29295	6.2371	2.95705	2.65666	2.02591	4.10045	3.06741	3.0672	3.25237	2.92604	3.48268	2.64326	4.20668	2.56312	2.28305	3.00799	3.10946	4.89264
GSE14520_GSM363170	3.32924	2.49543	2.89011	2.9223	2.6524	2.8954	2.94164	2.78382	3.08172	2.57223	3.89011	2.4209	5.23692	2.74593	5.8136	4.67887	3.28379	3.0511	2.58716	2.98821	3.15581	6.08964	2.91005	4.69648	3.62901	2.75306	3.52989	2.75063	4.96932	2.78052	2.49572	3.36828	3.53161	5.29545
GSE14520_GSM363178	3.46818	2.88286	2.69502	2.56721	2.77711	2.95738	2.78222	2.63797	3.5685	2.64262	3.34953	3.02539	4.51627	2.97386	6.24665	5.10462	3.56991	3.72436	2.73564	2.81451	3.32135	4.29039	2.74624	3.72106	3.38843	2.63225	3.54443	2.71642	3.72342	2.71905	2.71433	3.19834	3.5505	5.14077
GSE14520_GSM363184	3.4538	3.29336	3.16331	3.33592	2.64319	2.83094	2.74126	3.55941	2.92745	2.59779	4.35996	2.89961	4.95234	2.2778	6.18391	5.38221	2.66991	3.23298	2.31828	2.83143	3.60102	6.96857	2.78669	3.89907	4.99	2.72066	3.52165	2.83938	11.4763	2.43758	2.60025	3.66878	3.27854	5.02395
GSE14520_GSM363190	4.73375	3.01459	2.87546	2.44326	2.97261	2.75675	2.55785	3.14066	3.18379	2.52211	4.36599	3.09117	5.56411	2.68744	6.30975	5.62679	3.66997	3.18141	2.28341	2.93378	1.43172	5.10388	3.31028	4.19231	3.35683	2.48856	3.65544	2.489	5.44853	2.82882	2.4878	3.19633	3.91385	4.87948
GSE14520_GSM363192	3.54723	2.98503	2.77054	2.48638	2.86539	3.18835	3.29606	2.95349	3.36496	2.71005	3.1815	2.97948	4.90421	2.71948	6.6056	4.94819	3.91282	6.83335	2.50831	3.05643	3.46864	4.12373	3.15954	3.26915	3.24819	3.32974	3.48328	2.57168	3.45567	2.64002	2.48118	3.51313	3.11946	4.91316
GSE14520_GSM363194	3.52593	3.23771	2.92612	3.25387	2.77255	3.0901	2.64075	2.64511	2.97169	2.50375	3.91311	2.30856	4.98559	2.64431	6.35812	3.75014	4.12223	9.31788	2.43065	2.80391	4.1134	4.5818	2.83121	4.85638	3.39834	3.08087	3.632	2.67313	4.51635	2.3461	2.43926	5.37522	3.34334	5.11079
GSE14520_GSM363207	3.41031	2.86126	2.95935	3.17782	2.88841	2.86465	2.72914	3.8886	3.08172	2.60182	4.81316	3.09713	5.78812	2.57384	6.36904	3.43044	4.07274	4.17739	2.62994	2.74616	2.98329	5.5107	2.98257	4.53855	3.67819	2.82847	3.45191	2.81735	4.48013	2.76669	2.46814	3.11928	3.94285	5.4204
GSE14520_GSM363211	3.54955	3.73703	2.84377	2.96759	2.87646	2.66141	2.82091	3.04195	3.03817	2.60121	3.15735	2.28142	4.82842	2.76899	6.5335	5.09053	4.29404	4.62425	2.24394	2.73474	3.30795	4.23898	3.00153	3.69811	4.46038	3.34725	3.77821	2.76918	3.78854	2.71683	2.59106	6.72777	3.77318	5.4538
GSE14520_GSM363217	3.63806	3.03516	2.11274	2.57116	2.69026	2.52225	2.66085	2.82601	2.96561	2.55898	2.8417	2.72548	4.50629	2.57519	6.70021	5.27161	3.12161	6.73686	2.35533	2.47457	3.05767	3.54623	2.86836	2.84328	3.71438	2.69758	3.57806	2.53532	8.06229	2.24191	2.40636	2.94359	8.79484	3.8323
GSE14520_GSM363218	3.33039	3.03772	2.42127	2.76944	2.79065	2.75577	2.71347	3.06863	3.20998	2.57029	4.07833	3.10749	5.35336	2.78545	6.41638	4.36236	4.13363	4.82348	2.62974	3.60711	3.96844	4.47122	2.88216	4.46484	3.36071	2.50042	3.34026	2.61265	3.90451	2.54712	2.42786	3.21759	3.3927	6.58034
GSE14520_GSM363222	3.49975	3.06855	2.70838	2.60368	3.06557	2.66731	3.52707	2.96097	4.4777	2.7126	3.61689	2.14406	4.78758	2.57444	6.36029	6.78655	3.4781	3.96399	2.15389	3.42098	4.5495	4.19735	2.9635	3.53078	3.24774	2.61605	3.96064	2.6341	3.55761	2.92621	2.4733	4.8035	3.87557	4.58862
GSE14520_GSM363226	4.23302	3.24737	2.72407	2.98792	2.95215	2.65995	3.86127	3.20501	3.533	2.66545	3.97264	5.13307	5.09917	3.04351	5.79126	4.86451	4.18371	4.55665	2.88933	2.94142	3.93881	4.46001	2.85358	4.20865	5.19957	2.97647	3.25848	2.96479	3.57897	2.70943	2.58469	2.86632	3.34744	4.7019
GSE14520_GSM363232	3.60023	3.65962	4.63427	3.37092	2.87556	3.03669	2.95251	2.82087	3.41665	2.62709	5.21867	3.40582	5.75124	2.66572	6.32364	5.4232	3.70438	5.87982	1.99396	4.06571	6.20484	4.67604	3.30125	5.58432	5.5377	2.83953	3.28636	3.20682	4.5576	2.59751	2.44844	3.49638	3.89355	4.67869
GSE14520_GSM363235	3.53178	3.40899	3.21265	3.1928	2.85765	3.21206	2.43793	3.69808	3.24543	2.62963	5.33389	2.04497	6.29038	2.75277	6.16687	6.3988	4.19118	3.67331	2.46686	3.27553	4.17105	5.85717	3.06247	5.46076	3.53584	3.1283	3.96805	2.75813	4.8038	2.38345	2.47511	4.95595	3.61062	5.36249
GSE14520_GSM363237	5.23276	3.55907	2.87159	3.94819	3.25667	3.02505	2.84639	2.21043	3.31335	2.59787	5.36859	3.05658	6.79616	2.75594	7.12946	4.96897	3.85877	6.15887	2.51736	3.90129	5.09368	5.76688	3.07913	6.12497	3.89986	2.76	3.92292	2.8991	5.40221	2.20879	2.48101	3.23481	3.43247	6.02754
GSE14520_GSM363245	4.32796	3.64389	3.35457	3.88758	3.51669	2.59529	2.6223	3.01654	2.91302	2.66622	5.23068	2.59379	5.9382	3.03398	6.20839	3.25321	4.08648	4.99104	2.50457	3.49074	4.19092	5.19096	3.21175	5.15094	3.72284	2.60915	3.71657	2.56546	4.61791	2.42117	2.42877	5.21885	3.74776	4.38111
GSE14520_GSM363247	3.83257	3.13008	2.36418	2.67856	2.98532	3.18296	2.8905	3.38515	3.13666	2.69266	3.34157	2.50021	4.86739	2.65821	5.52216	3.9248	3.51822	3.91588	2.84141	2.67514	3.3016	4.28463	2.98189	3.76859	4.52712	2.62834	3.78887	2.54449	4.55017	2.54739	2.54978	3.36305	3.35764	4.85562
GSE14520_GSM363249	3.33828	3.24737	2.49027	2.54795	2.62535	2.23348	3.26619	3.01351	3.23497	2.60168	3.55704	3.62787	5.1341	3.02715	5.83246	4.91094	4.06243	4.82825	2.8613	2.64637	3.45006	4.25604	3.11837	3.76469	4.04579	2.70904	3.58133	2.60967	3.90855	2.76738	2.59658	4.90607	2.87043	5.47222
GSE14520_GSM363263	3.75746	2.53566	2.49116	3.5655	2.72562	2.96146	2.79314	3.19488	3.46019	2.58083	3.66113	3.60232	6.38777	2.6562	6.90742	5.15282	3.94977	4.30476	2.02169	3.36599	3.92993	5.19298	3.16915	3.96812	3.45369	3.15028	3.02319	2.80579	4.17982	2.49154	2.47634	3.34043	3.35126	5.07904
GSE14520_GSM363267	2.93653	3.28979	3.33721	4.29889	2.85881	2.92729	3.00205	2.72615	3.36725	2.70018	4.25132	3.0902	5.64271	2.70097	5.74301	5.47234	3.63118	4.66849	2.90935	2.92439	5.37861	4.98732	3.37586	6.20545	3.26015	3.55087	4.12623	2.50803	5.81343	2.7322	2.44498	3.69494	3.28457	5.14462
GSE14520_GSM363268	3.28587	3.37897	3.11603	3.21454	3.13761	2.69704	2.99072	2.65762	3.36588	2.7481	3.91048	3.69944	5.77227	2.92487	8.0213	4.29175	3.74907	3.36609	2.23339	3.63056	4.35374	4.97928	3.03389	5.55741	3.35982	3.01946	3.85794	2.80172	4.70147	2.73024	2.45894	3.23189	3.57686	4.63306
GSE14520_GSM363271	3.02168	3.59331	4.86124	4.27227	3.16513	3.06304	2.13521	2.57242	2.90198	2.78447	6.24273	2.62721	5.81138	2.77956	7.57678	3.62447	5.13394	3.5244	2.20476	3.4017	4.20312	9.80378	3.19479	5.70939	4.91805	3.0966	3.95434	2.63747	6.08415	2.83842	2.66179	4.43045	4.31044	5.14873
GSE14520_GSM363274	3.71375	2.94204	2.56702	2.87175	2.75832	3.03448	2.95171	2.80992	3.38955	2.73008	3.27308	3.28308	4.65182	2.50046	6.25834	5.59851	3.94327	7.71065	2.30082	3.0194	3.51323	3.80736	3.00851	3.31606	3.84117	3.04286	3.59651	2.81053	3.80293	2.43955	2.5693	4.94106	2.98301	5.74656
GSE14520_GSM363289	5.03122	2.54137	2.83216	2.83533	2.75625	2.76305	2.93558	2.7523	3.20724	2.83357	3.24479	3.13533	4.96757	2.53862	7.33559	5.13384	3.37207	7.12688	2.75002	2.86833	3.38953	4.33199	2.89385	3.58611	4.21043	2.77835	3.42577	2.81496	4.10407	2.53978	2.54284	5.42049	3.2691	4.85663
GSE14520_GSM363290	3.62967	3.31291	2.51274	3.67463	2.85554	2.47739	2.79619	2.86802	3.39294	2.75457	3.09396	2.40184	4.78316	2.82933	6.45891	4.78271	4.06392	4.51893	2.30807	2.39211	3.39286	4.47623	3.02507	4.67212	3.70146	4.02358	3.51888	3.13615	4.2443	2.56374	2.4741	4.51483	3.59042	4.56501
GSE14520_GSM363292	3.38922	3.42892	2.63964	3.23887	3.15658	2.20608	2.98357	3.13333	3.08736	2.5983	3.11147	2.75211	4.77821	2.74321	7.17591	6.09205	3.43848	8.06922	2.70204	2.95911	2.96927	3.8517	2.8977	3.65892	4.23208	2.78485	3.47754	2.57839	3.6765	2.64978	2.50465	3.45079	3.41532	4.85192
GSE14520_GSM363296	3.92659	2.32425	2.38881	3.13141	2.66804	3.06897	2.888	2.51469	3.34306	2.63657	3.05412	3.45662	4.59043	2.78416	6.83857	5.29408	4.24937	7.32295	2.41291	3.12985	3.98668	4.29103	2.96003	3.45333	3.45294	2.63487	3.65401	2.78437	3.94063	2.74593	2.54546	3.41482	3.72195	5.60831
GSE14520_GSM363297	4.23623	3.03016	3.51356	3.59347	2.8011	2.78473	2.61146	2.92299	2.83303	2.67141	5.39709	2.77463	5.72022	2.52535	6.64475	4.1812	4.14976	3.3352	2.00686	3.23049	5.06477	5.21593	2.9514	5.72958	3.60471	3.31091	3.6914	2.79633	5.89162	2.27942	2.47157	3.80508	3.30965	5.30674
GSE14520_GSM363310	3.19393	3.69494	2.22271	2.7193	3.3048	2.43827	3.33951	2.89158	3.61773	2.67981	3.40508	2.90508	5.75973	2.34228	6.8194	3.49532	3.39757	3.49388	2.02673	2.41356	3.34438	6.31117	3.084	3.66031	4.57682	2.8907	3.63361	2.53905	5.93252	2.50896	2.38595	3.60032	4.30501	5.90795
GSE14520_GSM363313	3.26881	2.65851	2.82523	3.67463	2.82337	2.81118	2.81003	2.84426	3.8125	2.58021	3.47044	3.09957	5.23169	2.41696	6.47337	4.92482	4.34476	4.04994	2.78887	3.3413	4.10723	4.07527	3.63063	3.56184	3.15743	3.1227	3.4931	2.41451	3.7487	2.86384	2.43264	3.06431	3.50847	5.04719
GSE14520_GSM363317	3.09321	4.25106	2.48134	3.40844	3.1393	2.46403	3.0685	4.21759	3.24703	2.68812	3.63321	2.36669	5.33293	2.49576	6.28034	5.37746	4.28769	6.14098	2.26511	2.67043	3.39286	4.40947	3.15367	4.65242	5.02884	2.75173	3.0793	2.66735	4.44863	2.77481	2.44064	2.92981	3.54068	6.80823
GSE14520_GSM363328	3.46397	3.34332	3.03039	2.74762	2.85734	2.20821	2.20466	2.63398	3.50824	2.65918	3.49182	3.62742	6.94638	2.44569	6.68943	5.87856	4.37026	3.39916	2.91103	2.54655	4.07419	5.58488	3.04104	3.29902	3.57801	3.08087	3.50268	2.57085	5.21076	2.59974	2.54769	2.80361	3.37868	5.16932
GSE14520_GSM363329	3.62922	3.76665	2.67441	3.56527	3.00657	2.60507	3.03696	3.76588	3.74215	2.5906	3.22073	3.12402	4.63323	2.5805	6.92447	4.79924	3.81268	3.86808	2.46515	2.4975	4.38793	4.64977	3.55071	4.9188	3.84351	3.26866	3.61335	2.94084	4.06199	2.86384	2.7565	4.16526	3.43582	5.13922
GSE14520_GSM363330	3.48547	2.98035	2.37342	3.19444	2.41717	3.0212	3.14975	3.70032	3.77291	2.72146	3.14337	3.22197	4.85217	2.97764	6.46281	5.42786	3.49289	6.07969	2.37079	2.32605	4.4382	4.40127	2.99583	3.30209	3.4028	2.81793	4.26845	2.66859	4.51148	2.52085	2.93344	4.03344	3.19326	5.8853
GSE14520_GSM363331	4.55422	3.75598	3.49774	4.31786	3.45605	2.71656	3.51785	3.11631	3.44487	2.59037	4.63433	2.94794	5.54227	2.77762	6.22969	5.95936	4.21057	6.07066	2.03607	3.25531	5.50085	6.30353	3.10845	5.81601	3.3044	2.97528	3.56138	3.24867	4.97942	2.6094	2.51427	3.31627	3.62883	4.21913
GSE14520_GSM363339	3.95564	2.47545	2.30488	3.17249	2.72988	2.6061	2.75063	2.93116	3.13275	2.63026	4.25755	3.03011	5.21108	2.48642	6.72832	4.51873	4.09928	5.35596	2.33581	2.82754	2.90229	4.51552	3.0712	4.09785	3.41142	2.98319	3.66763	2.76804	4.45193	2.67202	2.45583	3.74542	3.54574	6.12649
GSE14520_GSM363341	3.19701	2.60601	2.37464	2.6518	2.99092	2.6443	2.79919	3.23501	3.70374	2.64793	3.77041	3.4738	4.55228	2.55823	5.96607	4.63128	4.56082	4.78584	3.01037	2.97844	3.61626	4.25651	3.2848	3.97637	3.56199	3.67623	3.77926	3.43946	6.32471	2.65091	2.64431	3.33007	3.33013	6.3449
GSE14520_GSM363346	3.29618	2.3443	2.03493	3.04288	2.77636	3.13999	2.83809	2.39791	3.09339	2.68927	3.02196	2.766	5.15285	2.72995	7.73318	5.78001	4.33848	3.58579	2.61402	2.89258	3.27242	4.42411	3.0561	3.14585	3.59535	3.01022	3.5212	2.67149	4.76215	2.31478	2.70718	3.45357	3.18289	5.34903
GSE14520_GSM363348	3.61693	1.61046	2.38164	2.66887	2.23941	2.90631	2.78248	3.41185	2.93955	2.67931	3.38239	2.90905	4.38835	3.11656	6.55228	5.83966	3.87169	5.58765	2.67324	2.94936	3.57775	5.20152	2.6464	4.01015	3.32634	3.40501	4.67127	2.81646	4.50841	2.64618	2.40237	6.87054	3.18897	6.3013
GSE14520_GSM363350	3.61525	2.59073	2.67214	3.16643	2.48154	3.12903	2.54265	2.79279	2.92221	2.62795	4.11532	2.62126	5.00454	2.58203	5.64608	4.88662	3.87169	6.00496	1.67702	2.76533	3.17876	4.49804	2.60575	3.83579	4.18086	2.7762	3.74863	2.77123	4.6203	2.67524	2.50628	4.4062	3.37311	4.53941
GSE14520_GSM363354	3.4536	2.38136	2.72188	3.17966	2.69772	3.20145	3.15147	2.83707	2.89948	2.69014	4.13694	2.16307	4.44484	2.80921	6.49334	3.90187	3.11849	5.89972	2.47073	3.07201	3.17352	3.67903	3.00219	3.87997	3.58131	2.69011	4.25345	2.98918	3.9472	2.18168	2.4535	3.0662	2.82025	5.78393
GSE14520_GSM363355	2.83298	2.92348	2.40361	3.19479	2.75735	3.19941	2.84948	3.87048	2.87724	2.72431	3.73098	2.73683	4.7582	2.6288	5.95978	5.13468	4.2083	4.51255	3.15259	2.87258	3.32166	4.65065	2.93682	3.83997	5.055	2.40023	3.35327	2.6563	4.2869	2.5851	2.64443	3.67186	3.28901	5.37903
GSE14520_GSM363357	5.55728	2.29166	2.51919	2.76024	2.76917	2.90381	2.61807	2.23562	3.14795	2.75086	3.01265	3.30335	4.28379	2.98278	6.54164	3.84071	5.05016	6.19069	2.39436	3.60859	3.5352	4.3623	2.88808	3.2721	3.48249	2.71763	3.52154	2.80111	3.54352	2.71148	2.57196	5.02392	2.96334	5.56478
GSE14520_GSM363358	3.25202	2.86086	3.22138	2.56257	2.84705	2.77343	2.78641	3.10125	3.32579	2.63786	3.48147	3.85774	5.49764	3.00921	5.05053	4.92703	4.06178	9.12463	2.47792	3.229	3.4228	4.71953	3.18554	4.04709	3.56955	3.62555	3.41459	3.04391	7.25075	2.9233	2.63815	3.51525	3.32303	6.04312
GSE14520_GSM363368	3.66101	2.56002	2.62145	2.9359	3.01762	3.39807	2.56504	2.93323	3.00379	2.65498	3.74731	2.46943	5.07831	2.83607	6.35026	5.43106	4.35427	4.43006	2.51155	3.22706	4.33167	4.3582	2.89026	4.62571	3.69846	3.51232	3.83815	2.89969	4.24902	2.68293	2.43743	3.13121	3.39194	4.27239
GSE14520_GSM363376	4.17106	2.69835	2.75143	3.71012	2.34288	3.34878	2.78299	2.12644	3.42761	2.55364	4.36723	2.05956	5.68253	2.84545	6.57292	5.9871	3.43955	5.69094	2.74426	3.42207	4.40543	5.68262	3.21833	4.93257	3.47335	2.66865	3.49898	2.84296	6.40339	2.55338	2.71137	3.6527	3.11273	6.58211
GSE14520_GSM363384	3.11569	3.57464	2.95957	3.19329	3.3466	3.40909	2.74506	3.38049	3.00632	2.68782	4.26345	4.00426	5.02205	2.69641	6.59764	4.89224	4.16545	5.77778	2.73953	3.32664	4.45015	4.78701	2.8512	5.4456	3.69251	2.59466	4.43722	2.79994	4.35329	2.53101	2.46785	4.7	3.72006	4.69243
GSE14520_GSM363400	2.59969	3.1854	2.44455	3.08865	2.27044	2.58854	2.79238	3.15076	3.31791	2.73238	2.99709	1.95016	4.52534	2.52813	5.51654	3.94343	3.48034	4.09847	3.07677	2.78443	4.07378	3.12046	2.70112	3.45527	3.9879	3.3429	3.45993	2.86731	5.24639	2.67904	2.44802	3.70005	2.7276	4.82417
GSE14520_GSM712542	2.9579	5.37838	2.95495	2.40651	4.44981	2.09998	3.98745	5.29117	3.56523	2.7895	3.57259	3.25484	4.30066	2.2981	5.88132	5.01121	3.2919	5.36745	2.1247	3.03262	3.10883	4.64371	3.19598	2.97207	2.8114	3.83001	4.99745	2.54509	3.54546	2.65732	3.16625	5.85172	4.4736	4.18327
GSE36376_GSM890322	3.25448	2.94694	2.27969	3.97488	2.90091	2.79341	2.0855	2.73192	3.06003	2.79699	3.90578	2.85113	4.56121	2.79918	6.19753	5.60285	4.2069	5.11726	2.58217	3.30604	3.39817	4.33695	5.05794	3.68611	3.51873	3.11184	3.28331	2.30468	6.24057	2.39973	2.57276	3.17578	3.16841	5.8189
GSE36376_GSM890323	3.20185	3.10449	2.3028	2.99518	3.01096	2.91454	3.58701	2.7793	3.45982	2.55704	4.98627	3.84181	4.0271	2.78826	6.08035	3.71077	3.65256	3.53666	3.21816	3.5971	3.88579	5.70019	3.15092	3.48382	4.31164	2.74106	3.77114	3.36488	5.53517	2.12895	2.45748	3.59697	3.67443	5.22439
GSE36376_GSM890324	2.83329	3.06917	2.26735	2.34049	2.83807	3.05969	3.57821	2.89711	3.11881	2.79255	3.86391	3.70972	3.71117	3.09354	6.65578	3.43137	3.94554	4.77174	2.20518	2.77111	3.28604	4.85195	3.50429	3.14402	3.37454	2.65652	3.30487	2.73573	3.97763	2.49374	2.42331	5.9403	3.32165	6.36515
GSE36376_GSM890325	3.15106	2.61773	2.68829	2.59793	2.9378	3.05923	2.47919	3.20424	3.37881	2.64833	2.97907	2.53455	4.28168	2.81497	6.66415	3.86325	3.53298	4.80585	2.60731	3.11664	3.24397	4.33171	2.9088	5.30046	4.09729	3.00699	3.69718	3.01389	4.60824	2.87583	2.54855	6.38775	2.89872	5.36368
GSE36376_GSM890326	3.58593	2.51841	2.35628	2.94885	2.72392	2.57474	2.94782	2.90971	3.90377	2.3697	2.74351	2.38206	4.23306	3.15975	6.26049	4.45782	3.10031	5.05889	2.21243	4.00291	2.94121	3.82472	2.56868	3.35129	3.0158	2.43484	3.2485	2.63107	3.0746	2.82881	2.40695	3.39497	3.54177	4.96707
GSE36376_GSM890328	3.36112	3.17694	3.16344	3.05937	2.95418	2.79879	3.25947	3.02529	3.09482	2.45672	4.64696	2.67075	5.81032	2.67717	6.34182	4.51385	3.74343	5.84509	3.08216	2.73659	3.29455	6.39787	3.0146	3.73205	4.21379	2.75556	3.51924	2.26709	5.09534	2.48436	2.66218	3.60594	3.07376	5.50913
GSE36376_GSM890330	2.74287	2.64643	2.23744	3.01614	3.37411	3.17226	2.95777	4.5987	4.20126	2.52447	3.22825	2.91683	5.09338	2.53036	6.32205	4.61605	3.98326	4.43521	2.0104	2.32171	3.11304	4.27359	4.24868	3.05312	3.90652	2.63102	3.26651	2.75749	2.83732	2.83097	2.44974	3.79897	3.81093	4.15691
GSE36376_GSM890338	3.0368	5.50157	3.80159	4.98266	3.20377	3.17159	3.7115	1.99851	3.54511	2.66671	5.38865	5.20706	4.13228	3.11594	5.40971	4.10522	4.924	3.8074	2.211	3.12692	6.77784	6.35466	2.95658	5.51803	4.1955	3.63252	4.12485	2.84599	6.63692	2.49794	2.538	3.96264	3.49246	5.37829
GSE36376_GSM890339	4.32366	3.20779	3.15168	3.41055	3.04505	2.96081	1.68847	3.31856	3.33637	2.61606	5.41213	3.42073	4.40724	2.70252	6.66873	5.53394	3.90959	3.34551	3.25089	3.507	4.06779	5.87829	2.51559	4.92822	3.89313	2.85858	3.6269	3.42633	5.56311	2.7203	2.56308	3.26683	3.05438	5.19069
GSE36376_GSM890344	2.8358	3.19599	2.30002	2.60693	2.56456	2.94258	2.94812	2.99085	3.36608	2.5542	4.29355	3.06242	5.33901	2.48046	5.93142	4.90379	3.13141	4.35478	2.41566	2.73314	3.62849	5.09399	2.78112	4.39097	5.48745	3.53676	3.39084	2.75186	4.57113	2.58793	2.46923	4.23496	3.60684	4.9177
GSE36376_GSM890346	4.09442	3.03261	4.45069	2.66944	2.93966	3.00244	2.703	3.84541	3.57258	2.76286	3.97401	2.36226	5.24321	2.88091	6.9068	4.04896	3.62919	6.63936	2.9271	2.67948	3.37636	5.42388	3.54069	3.58933	5.02889	2.73704	3.15756	2.80672	5.87851	2.54646	2.55012	4.0252	3.59569	5.44361
GSE36376_GSM890347	2.32235	2.49449	2.5701	3.07727	2.76413	3.01624	3.2943	3.25469	3.74599	2.56135	3.88724	2.49959	4.3289	2.60058	5.45248	4.39749	3.99131	5.63258	2.20591	1.8277	3.17074	4.58231	3.71467	3.46025	3.65854	2.88236	3.46983	2.22392	3.65649	2.744	2.62667	3.84071	3.79795	5.30821
GSE36376_GSM890349	2.30508	3.23254	2.70556	3.90338	2.91406	3.20178	2.7316	3.90784	3.67199	2.62532	3.83975	3.8938	4.88299	3.1142	6.13839	4.07798	3.87207	3.5987	2.85405	3.20716	4.51687	4.29651	3.30526	3.71962	3.5846	2.71318	3.78899	2.89708	4.8179	2.55485	2.51616	3.37512	3.10685	5.12594
GSE36376_GSM890350	7.34147	2.94767	2.70302	2.77942	2.85149	2.99325	3.51959	2.4846	3.9512	2.50137	3.39536	2.29944	4.47643	2.67159	7.1502	4.53177	3.77687	6.96895	2.45765	2.31197	2.99651	4.87228	2.5332	3.14261	3.46896	2.44479	3.52033	2.73842	3.85745	2.94369	2.22504	3.31352	3.1509	4.72012
GSE36376_GSM890352	2.89581	3.15477	3.59009	2.72138	2.77921	2.62568	3.53087	4.13278	3.53747	2.57178	4.31096	2.36565	6.12359	2.71234	5.93188	5.70478	3.80076	7.89119	2.9337	2.23553	3.26103	5.35564	3.23905	3.87227	5.61328	2.97852	3.30324	2.70625	4.05607	2.17689	2.44294	3.25027	3.2777	5.63091
GSE36376_GSM890353	2.97404	2.71035	3.12041	2.85578	2.40444	2.80769	3.14906	2.68964	3.39891	2.63565	3.87874	2.92811	4.93449	2.88975	6.65757	3.70483	3.23308	3.51117	2.93185	2.17054	3.52915	5.02323	2.7292	4.76759	3.04869	3.64057	3.86	2.56933	4.44851	2.53108	2.3509	3.89677	3.79619	6.84258
GSE36376_GSM890355	2.52045	3.00168	2.82033	2.75392	2.77993	2.45669	3.10349	3.24605	3.39038	2.67774	4.7767	2.71142	5.06683	2.55035	6.19513	4.21415	4.17277	7.54562	2.96951	3.02893	3.42259	5.47213	2.87956	4.47107	3.16727	2.99937	3.04426	3.12683	5.4048	2.33643	2.41336	3.31643	3.85225	6.08986
GSE36376_GSM890356	2.96443	2.43135	2.48528	2.75187	3.09911	2.48393	2.71465	2.74697	3.62272	2.66391	3.44485	2.76976	4.16587	2.64141	6.43913	4.06109	3.43619	8.08712	2.61896	2.53338	3.07347	5.03921	3.51683	3.63019	3.89759	3.66003	3.36667	2.54422	3.81242	2.78759	2.47234	6.09347	4.48272	5.13796
GSE36376_GSM890358	2.97466	3.11376	3.16052	3.45057	2.60142	2.7687	2.99327	3.47091	3.21345	2.59061	4.46446	3.04219	5.48937	2.77181	5.81962	4.86611	3.59094	5.1623	2.77949	3.50181	4.34043	5.10853	3.37441	5.28055	3.68008	3.66476	3.18572	3.37574	5.11819	2.24199	2.57936	3.68403	3.04451	5.8189
GSE36376_GSM890361	4.53885	2.66625	2.92089	2.73476	2.83786	2.82852	3.42216	2.90845	3.59844	2.70558	3.22611	1.91105	5.45987	2.58914	7.03544	4.0889	3.37151	6.98058	2.38308	1.74743	3.10001	5.57862	3.01685	3.70774	6.95758	2.80709	3.19045	2.44011	3.73555	2.15643	2.47187	3.94408	3.89437	5.47496
GSE36376_GSM890362	2.88548	2.81882	3.35725	2.69315	2.46584	2.95804	2.93381	2.59253	4.04655	2.78256	3.32204	2.95567	5.52906	2.90645	6.81372	4.32456	3.99694	4.54909	2.67075	2.63654	2.91453	4.63436	2.66692	4.6561	4.50092	3.61999	3.47785	2.55259	3.96377	2.57881	2.50267	3.90136	3.98448	5.9452
GSE36376_GSM890363	2.72516	4.09269	3.58943	2.85621	2.88032	3.25639	3.28461	3.17815	3.52945	2.54307	4.28822	3.60801	6.76378	2.81384	5.92757	5.6578	3.30131	8.66669	2.17598	3.40998	4.92191	5.55375	2.98245	4.78327	3.22767	3.23976	3.83197	3.78341	4.78933	2.49632	2.84394	4.11097	4.59865	5.41831
GSE36376_GSM890364	3.50275	2.94034	2.77768	3.35071	2.54854	2.97702	2.89833	3.07539	3.56485	2.56257	4.72222	2.81316	4.89834	2.81034	5.88288	3.82663	3.61942	3.61671	2.46712	3.47957	3.54471	5.40035	2.64464	4.25623	3.58133	2.97327	3.67579	2.7111	5.43201	2.83528	2.58669	4.35731	3.62659	5.8465
GSE36376_GSM890367	4.76668	3.23701	2.13246	2.95481	2.75597	3.16146	3.40222	3.47707	3.44704	2.75682	3.69476	2.40947	4.62268	2.54354	6.1839	5.32231	3.63895	6.07765	3.20807	3.06058	3.07529	5.72361	3.0901	2.7772	4.30336	2.38109	3.42427	2.90376	5.11569	2.12668	2.60942	4.01581	2.93082	4.88636
GSE36376_GSM890371	3.80093	3.26574	3.43543	2.66271	2.93287	2.84689	3.10987	2.99791	2.91725	2.62674	2.94603	4.07332	5.8826	2.95329	6.40837	4.04627	3.8243	6.57097	2.4797	2.82662	3.67733	4.55137	3.03854	3.69978	4.81486	2.69953	3.75509	2.40854	3.41919	2.7017	2.4271	4.32585	3.60634	6.15861
GSE36376_GSM890375	2.4728	3.45832	2.79844	3.03311	2.62814	3.04356	2.61094	3.15052	3.27363	2.65171	4.34249	3.62493	3.17046	2.8198	6.29779	6.40531	3.70634	8.43102	2.1097	3.09822	4.21165	4.54719	3.3092	4.32829	3.25938	2.27768	3.35982	2.7529	4.27505	2.48732	2.44204	3.76557	3.67377	5.23439
GSE36376_GSM890382	3.31607	2.67902	2.17068	2.88589	3.57425	3.04803	2.19096	3.08714	3.29095	2.50381	3.13397	2.64468	3.96624	2.77623	6.82938	3.94048	3.25288	5.28115	2.82499	2.87138	3.13966	4.29157	3.31668	3.42084	4.27646	2.54573	3.62915	2.65504	3.7874	2.77616	2.56998	3.42784	2.63255	5.13951
GSE36376_GSM890383	3.84091	2.92578	2.44488	3.36351	2.7533	2.80937	2.83817	3.09954	3.66809	2.68669	3.40404	2.51643	4.75518	2.42206	7.19428	4.08053	3.6811	5.13987	2.89663	3.17616	3.46138	4.43008	2.97473	3.65837	3.85275	2.33676	3.40048	2.78018	4.49108	3.02037	2.48688	3.70624	3.15745	5.31545
GSE36376_GSM890384	4.47291	2.48851	2.63441	2.95682	3.18963	2.41682	2.33026	2.89186	3.25645	2.73273	3.12643	2.64468	3.7153	2.82816	6.71047	3.76277	3.90482	5.28051	2.72982	3.02853	2.93348	4.49159	3.2426	3.08546	3.71028	2.48922	3.22102	2.40893	3.51614	2.78395	2.48339	5.13048	2.86511	5.67983
GSE36376_GSM890389	3.27975	2.8795	2.87913	3.04802	2.9964	2.50477	2.34156	2.71509	3.21457	2.55096	3.38095	2.5487	4.23795	2.87594	6.58228	4.61077	3.93735	3.72595	2.52602	2.85114	3.35956	4.95051	3.08931	3.93584	4.6192	2.66911	3.46094	2.62377	4.55583	2.69095	2.47601	3.52222	2.82335	6.78009
GSE36376_GSM890396	3.1128	2.87416	2.81224	2.86857	2.93806	3.04014	2.91101	2.60546	3.34181	2.6956	4.30086	3.65205	4.72372	2.69369	6.33021	4.84208	3.82934	5.26032	3.10039	2.62002	3.48656	6.78099	3.06678	5.66408	2.95502	3.10674	3.5214	2.5638	5.57611	2.61973	2.47727	3.22816	3.73318	5.92578
GSE36376_GSM890398	3.10174	2.56055	2.73684	3.6483	2.7165	2.85816	2.68519	2.13332	3.4655	2.95932	3.34482	2.67075	3.84123	2.68218	7.18357	3.89377	3.33049	5.60616	2.31296	2.40916	3.24121	4.79208	2.91518	4.78961	3.1653	2.92324	3.96927	2.85693	4.77973	2.49657	2.58185	3.14527	4.2238	5.95922
GSE36376_GSM890401	4.52795	2.4109	3.23494	3.2322	2.60678	3.04995	2.78154	2.63905	3.4062	2.69853	2.96895	2.18381	4.68288	2.77656	6.70776	4.82432	3.60154	3.6115	2.59526	3.1271	3.2359	4.87586	2.45902	3.5104	3.48974	2.20731	3.47842	2.93312	4.30371	2.73723	2.55094	3.21076	3.11734	5.20283
GSE36376_GSM890405	3.18382	3.05756	4.35729	2.69794	2.78901	3.04603	3.44842	3.48546	3.43354	2.59196	4.94638	2.78817	6.93288	2.78655	6.86419	4.74163	3.33743	5.15027	2.39366	2.61605	4.00518	8.90267	2.98973	4.73326	4.70598	3.111	3.61925	2.34847	6.15262	2.54143	2.69561	6.07877	3.02094	6.08986
GSE36376_GSM890406	3.06651	2.67216	3.13322	2.79831	2.99442	-2.50408	3.03611	3.06833	3.41112	2.70755	3.16908	2.96932	6.07364	2.83129	6.79676	5.61552	3.58582	9.91698	2.50622	2.98061	3.33341	4.50722	3.71382	3.86185	3.44435	2.86286	3.3012	2.66242	4.57549	2.44222	2.31103	3.50645	2.85648	5.09401
GSE36376_GSM890411	2.63537	3.10862	3.3529	2.79181	2.90294	2.79879	1.84284	3.16903	3.57667	2.68887	3.49225	3.0431	4.43231	2.51031	5.79858	4.16612	3.88808	4.71789	2.5252	2.62667	3.72804	5.15365	2.9303	4.36845	4.02334	2.96699	4.45653	2.80487	4.38626	2.38942	2.45668	4.04073	2.81508	6.06736
GSE36376_GSM890412	2.68859	3.22375	3.21891	3.53947	2.53418	2.52415	2.85627	2.53459	3.71279	2.77792	3.21184	2.66539	6.34361	2.69822	7.70882	5.42015	3.91438	5.46903	3.14986	2.80459	4.07987	4.8061	2.82013	4.93813	3.27828	3.40969	3.50731	3.08604	5.27195	2.86788	2.38756	3.08552	3.04974	5.88122
GSE36376_GSM890416	3.17145	2.96488	2.69544	2.72445	2.79947	2.61831	3.26856	3.67861	3.25715	2.48706	4.00044	2.9938	4.90388	2.89832	5.65992	5.55834	3.68621	3.81535	2.4881	2.62143	3.90003	5.66999	2.84449	4.29181	3.9755	2.77657	3.70109	2.74731	5.29021	2.2876	2.60818	7.35444	3.33935	6.62326
GSE36376_GSM890417	3.04495	2.55662	3.14788	2.60629	2.97236	2.95732	3.5123	3.0111	3.85785	2.70796	3.38942	2.99564	4.44669	2.59932	7.3738	3.92625	3.05469	5.11596	2.75134	2.65905	3.25395	4.57015	2.31231	4.53353	3.65337	2.81809	3.22885	2.749	4.2257	2.64077	2.35971	3.30266	3.61719	5.31489
GSE36376_GSM890420	2.96667	2.7915	2.65572	3.13029	3.32798	3.07042	2.48617	3.60974	2.57482	2.80534	3.74487	2.72815	5.69437	2.51582	6.01175	5.5575	5.173	4.84861	3.19666	2.61178	3.23605	5.8553	3.90857	3.64975	3.68967	2.60932	3.9142	2.56792	7.02069	2.41984	2.48496	3.15236	3.99941	6.77337
GSE36376_GSM890421	2.9819	2.57767	2.36229	3.46774	2.83807	2.88011	2.41918	3.6124	3.09471	2.8406	3.44299	2.93161	4.58653	2.88053	5.79777	4.75706	3.87989	4.99238	2.06916	2.89544	3.11154	4.38669	3.38551	3.77863	3.35295	2.82979	3.49413	3.10317	5.83228	2.4586	2.58931	3.13461	3.17988	6.91935
GSE36376_GSM890422	3.49448	3.37127	3.03675	2.73201	2.88752	2.67967	3.2037	2.14256	3.20259	2.7217	3.05878	3.38757	4.96043	2.96504	7.12433	5.54769	3.52406	5.09816	2.80972	2.56059	3.57389	4.3135	2.37559	3.7828	3.37852	2.18543	3.20981	2.43123	4.16431	2.28056	2.45767	3.91663	2.91453	5.25027
GSE36376_GSM890424	4.80662	2.72897	2.82986	2.91497	2.76358	2.83287	2.60641	3.15176	3.27631	2.62342	3.36408	2.49445	4.7704	2.48583	7.48558	5.04586	3.58857	5.38955	2.80198	2.34352	2.93938	4.90968	2.91232	3.7838	3.1595	2.28112	3.30758	2.83507	4.42723	2.18728	2.5366	3.27106	3.45249	5.16335
GSE36376_GSM890428	6.67075	2.7884	2.48635	2.79181	3.77506	2.93165	3.0063	1.36336	2.8592	2.85432	3.77691	2.8583	4.68801	2.59361	7.3622	5.60838	5.29169	5.16344	2.70899	2.59194	3.3882	5.74528	3.08583	3.60449	3.48523	2.93371	4.02362	2.78625	7.29785	2.75772	2.46993	4.58331	2.8567	6.06736
GSE36376_GSM890429	2.81737	3.34282	2.80284	3.80871	3.14394	2.41682	3.5285	3.80107	3.0597	2.81018	4.16259	4.01361	4.95506	2.3243	7.0053	6.31262	4.67654	8.64627	2.64126	2.43032	5.11633	5.74177	3.56843	5.38271	3.63151	2.61814	3.65735	2.42762	5.00207	2.66299	2.5648	3.76827	2.75435	5.72524
GSE36376_GSM890430	2.62964	2.54487	2.9228	2.69041	2.6088	2.86567	2.12277	2.92733	3.18953	2.62452	3.04024	2.88773	4.72372	2.96144	5.48868	4.51814	3.43562	4.93923	2.7981	2.41472	3.14989	3.75417	3.14303	4.16627	4.21533	1.8729	3.07267	3.24039	3.98439	2.41653	2.37904	3.27861	3.34878	5.19114
GSE36376_GSM890432	3.34898	2.9152	2.75942	3.03311	2.64442	3.08428	2.59276	2.83507	3.11046	2.64532	4.37648	3.76188	5.43689	2.66374	5.94681	4.22445	3.54653	4.22119	2.75013	2.89775	4.58498	5.04406	2.91518	6.72853	3.87712	2.94983	4.44225	3.88138	6.28846	2.63296	2.56752	5.0191	3.62155	6.44393
GSE36376_GSM890433	3.2759	2.53892	2.72154	2.33136	2.74157	3.15803	2.70849	2.76158	3.34737	2.63818	3.87755	2.42564	5.93145	2.6177	6.0971	7.03291	4.08003	4.74931	2.42816	2.71154	3.02469	5.66999	3.28572	4.11899	3.51953	2.26062	3.5543	2.42345	5.02025	2.7596	2.55671	3.05549	2.89063	5.91272
GSE36376_GSM890435	2.92879	3.26449	3.30517	3.51519	2.92094	2.65043	2.65575	3.04645	2.90263	2.7182	3.32627	2.17865	4.98211	2.93732	7.1698	4.71541	4.13455	5.67522	2.77269	2.71289	3.22033	4.62434	2.6518	3.98122	3.86363	2.46284	3.04578	2.63571	4.46322	2.78616	2.66037	3.07089	3.64626	5.24368
GSE36376_GSM890436	2.84043	2.5864	3.13903	3.55041	2.67192	2.94779	2.46707	1.98385	3.56424	2.63249	3.82895	3.04693	4.04565	2.36913	5.59817	6.09113	4.30822	3.2856	2.81222	2.94514	3.35003	5.61568	2.9055	4.33534	4.16209	3.04078	3.64865	2.71126	5.54777	2.5116	2.58023	4.05066	3.12047	6.06226
GSE36376_GSM890440	6.24309	3.07334	2.53075	3.35184	2.65824	3.09082	2.90015	3.09732	3.49924	2.55084	4.72922	3.10641	4.89834	2.60653	7.48558	3.9199	3.66535	8.07875	3.10408	3.45663	3.68912	4.7359	3.27257	5.75129	3.67327	2.42601	3.31342	2.95364	5.98127	2.77511	2.36215	3.21879	4.67937	5.58242
GSE36376_GSM890441	4.42226	3.85128	3.05421	3.67989	2.72425	3.37178	3.60437	3.02211	3.29336	2.63904	4.72831	4.12465	5.33901	2.72777	5.84997	3.99247	4.93391	4.36741	3.34716	3.69543	4.86234	4.75634	2.72764	6.12373	3.38944	3.20937	3.34296	3.01648	5.31236	2.89291	2.58134	4.30597	4.32237	6.20956
GSE36376_GSM890442	2.76738	3.42506	2.89145	2.96642	3.1703	2.80245	2.86084	3.09161	3.80104	2.64674	4.02137	3.02833	5.76732	2.40707	4.96329	5.35865	4.99296	4.24634	2.60242	3.16263	3.3202	4.63327	2.66565	4.31036	3.68648	2.80354	3.46229	2.54269	4.80657	2.71045	2.46239	3.44837	4.37854	5.94737
GSE36376_GSM890444	4.22896	3.15113	3.22536	3.95873	2.90852	2.80412	3.19841	3.06638	2.70682	2.76039	4.58694	3.56443	4.6933	2.82594	6.2892	6.24947	5.91179	4.87466	2.13924	3.14853	5.16164	5.05315	3.56119	5.3896	3.62862	2.75488	3.9142	2.88146	6.1565	2.52143	2.48411	4.32729	3.17203	6.32542
GSE36376_GSM890445	4.94079	2.74802	2.20388	3.5665	3.70275	2.81106	2.46896	2.17311	3.79732	2.7052	3.09455	2.99564	4.45181	2.7323	7.52351	5.88121	4.03526	4.91911	2.31275	2.23078	3.7895	4.61396	3.49902	4.08887	4.30097	3.07871	4.0541	2.34847	4.58578	2.42413	2.43091	4.89325	3.25061	5.42881
GSE36376_GSM890446	3.38154	2.86179	2.3729	2.39142	4.04516	3.06519	2.76502	2.76773	3.13294	2.78556	4.13641	2.68497	3.66974	2.84754	6.57203	5.60032	4.50014	5.63942	2.84774	2.71445	3.19799	4.85509	3.33304	4.83327	3.30054	2.74327	3.24564	2.89993	4.88759	2.49765	2.44721	3.24839	3.26012	6.06303
GSE36376_GSM890447	4.73608	3.88615	3.33068	3.15077	3.05639	2.3385	3.06078	2.96942	3.18726	2.58038	3.50995	5.45534	5.83404	2.86043	7.53665	5.34695	3.87555	6.9978	2.61789	3.94386	4.80605	4.52721	3.26643	4.96123	3.25137	3.30069	3.3053	3.23933	4.219	2.44631	2.31807	3.89593	3.89581	6.08836
GSE36376_GSM890449	3.28329	2.73618	2.18401	2.77788	2.53604	3.17653	3.28226	2.94335	3.05274	2.578	3.21458	2.84221	5.51728	2.73067	5.94163	5.33393	3.38832	4.47941	2.25593	2.84585	3.46268	3.77296	3.32095	3.7869	3.46857	2.75374	3.18688	2.93573	3.25381	2.34709	2.36583	3.15124	2.94185	5.10081
GSE36376_GSM890451	2.92388	2.91802	2.02383	3.39548	2.44237	3.00734	2.98476	3.3512	2.68061	2.7437	3.05688	2.44655	5.84032	2.82267	6.0406	5.46838	3.62682	6.06126	3.07888	3.12655	3.15433	4.48819	3.47445	4.34299	3.01263	2.52242	3.29876	2.42569	4.24883	2.58181	2.41497	3.28138	3.74463	6.30181
GSE36376_GSM890452	5.21177	3.33186	2.81165	3.56357	2.74724	3.01906	2.76803	3.53638	2.77769	2.5245	5.53465	2.96095	4.96536	2.78795	7.30922	3.68835	4.43776	5.24984	2.2688	3.10905	4.91377	6.02881	3.66701	6.13203	4.78412	2.72153	3.73625	2.4323	6.61521	2.55762	2.53531	4.0908	2.70486	5.59652
GSE36376_GSM890454	2.93535	7.23998	3.14838	2.88995	2.79635	2.48393	2.97534	3.40382	2.9708	2.69024	2.73737	3.17388	4.53638	2.98826	6.17877	4.63084	3.4376	3.91815	2.48702	2.23603	3.36005	4.12011	3.25839	3.4574	5.38364	1.91206	3.94357	2.62143	3.35964	2.57157	2.3314	4.658	3.29514	5.32325
GSE36376_GSM890456	3.09467	2.6519	1.99387	3.71174	3.57166	2.93871	2.46454	3.62801	2.9766	2.61327	3.56613	3.26643	4.20849	2.32299	6.27749	6.08488	3.97505	5.77071	2.56108	2.77613	2.97244	4.57457	3.40028	4.01463	3.12962	2.76428	3.65342	2.32996	4.73134	2.33894	2.56031	5.73793	2.32405	6.65554
GSE36376_GSM890457	5.94757	3.36094	2.27668	2.94146	2.69507	2.70774	3.19357	2.617	3.35212	2.44876	4.84301	3.05792	5.58765	2.89082	8.02071	3.94919	3.68659	7.65947	2.90481	2.93021	3.85778	5.03933	3.00789	5.60589	4.23892	3.23651	3.34918	2.82504	6.16887	3.20116	2.26974	3.20137	4.43384	6.49683
GSE36376_GSM890462	2.94135	2.59543	3.65876	2.96388	2.93006	2.91539	3.127	2.62739	2.99974	2.43017	4.36915	2.26159	4.55142	2.68868	6.34642	5.11172	3.01665	8.71609	2.80192	3.24243	3.49437	4.84209	2.84332	4.55235	3.66318	2.37454	3.56406	4.31513	5.16581	2.30287	2.46424	3.44014	2.41525	5.44535
GSE36376_GSM890463	4.28552	4.02889	3.20085	3.31946	2.82267	3.17592	2.97017	3.07978	3.55987	2.69518	4.63282	5.07022	5.82201	2.53602	6.86563	4.75111	3.86082	7.39311	2.53247	2.93634	4.77974	5.96138	2.9191	5.68349	4.04855	3.0091	3.33295	2.37851	6.18659	3.17449	2.29917	3.17017	4.12858	5.20081
GSE36376_GSM890465	2.88087	2.58052	1.95882	2.50215	2.69563	2.857	3.23753	2.61884	2.88967	2.70533	2.4027	2.31214	5.50008	2.85868	5.8533	4.41196	3.23747	3.98561	2.6497	2.17886	3.01153	3.81998	2.6945	3.23235	4.76509	3.02674	3.07736	2.26169	3.20733	2.73285	2.49331	3.48016	3.73887	4.24585
GSE36376_GSM890466	3.1763	3.31139	2.24889	2.88069	2.94686	2.63216	3.52715	3.40816	3.78423	2.64323	3.12823	3.13842	5.76732	2.46093	6.69824	5.49954	3.65481	5.15597	2.68941	2.44442	3.40777	4.49996	3.07571	4.74385	3.33814	3.12732	3.18157	2.57789	5.05995	3.02661	2.48927	3.10127	3.40047	4.88983
GSE36376_GSM890467	3.18583	2.42203	2.59742	3.12864	2.71293	2.98156	2.76742	3.71396	3.49738	2.69865	3.81225	2.68682	5.23768	2.75086	5.99972	3.99543	4.51814	4.41073	2.08148	2.992	3.04533	4.60906	2.89134	5.30193	3.13249	2.66523	3.48021	2.89627	5.7419	2.60603	2.31179	2.89453	2.96475	6.13724
GSE36376_GSM890468	2.68486	2.79794	2.99761	2.86773	2.46424	2.75734	3.71332	2.17874	3.09912	2.47831	4.85983	4.78194	4.91395	2.60001	6.80939	4.12093	4.16327	4.95821	2.26085	3.73753	4.0682	4.27859	3.07459	7.37276	3.60108	3.14018	3.81549	3.46222	5.40211	2.72949	2.66803	5.44177	3.25099	5.72721
GSE36376_GSM890472	3.00204	2.76598	2.68386	2.99518	3.40593	2.94713	3.00661	4.15708	4.0238	2.66609	2.30439	2.21834	6.01058	2.36136	5.20526	5.73113	4.11654	3.86605	3.18244	2.46996	3.13818	3.92179	2.62651	2.74463	3.26273	3.13271	3.86973	3.06054	2.64336	2.78375	2.50297	3.49738	3.60551	3.97199
GSE36376_GSM890477	2.67552	4.88644	3.8515	3.34503	2.77434	2.78581	3.28453	2.63981	3.46878	2.71837	5.5872	4.37765	5.51154	2.68892	5.70117	3.91208	3.99647	3.74918	2.95562	2.94983	5.32992	5.79194	2.77088	6.15716	4.09598	2.98072	3.29708	3.05669	6.05135	3.25628	2.33972	3.6631	4.53382	5.81017
GSE36376_GSM890486	5.12276	3.02931	3.00525	2.85851	2.87221	2.56379	2.96588	2.94948	2.79507	2.58767	4.04721	3.0295	4.91396	2.84112	6.40837	3.92112	4.08089	4.65146	2.45207	2.78145	3.32071	5.16795	3.54507	5.40912	3.18941	3.74629	3.42604	3.12316	6.3871	2.744	2.42027	3.60967	4.71921	6.06091
GSE36376_GSM890489	3.39509	2.89136	2.93034	2.43481	2.71447	2.79698	3.42997	2.74101	3.10106	2.60183	3.23931	3.79741	5.077	2.91544	7.01494	4.78671	2.98662	6.55963	2.4507	3.05754	3.69501	4.8339	2.96709	4.46873	3.48523	3.53185	3.60124	2.6053	4.41425	2.24604	2.64295	4.69879	2.69158	5.75675
GSE36376_GSM890490	2.75064	3.32307	3.80421	2.8764	2.63648	2.76456	3.42288	2.96474	3.31694	2.50828	4.10777	4.12318	6.15684	2.58723	6.29241	5.68954	2.9676	4.75288	2.90401	2.79673	4.50468	6.39939	2.26193	4.59783	4.97588	3.23698	3.07219	2.53368	6.66625	2.40711	2.62793	3.77931	3.37572	5.12885
GSE36376_GSM890491	3.94566	2.68193	2.31004	3.1333	2.91787	2.60982	3.12488	3.58675	3.22697	2.69364	3.548	2.39127	5.34963	2.47596	6.70226	5.03137	3.89147	5.01037	2.41824	2.78863	2.99509	3.99818	2.98781	3.67864	3.41409	2.93568	3.30332	2.56626	3.64304	2.97675	2.52195	3.36409	3.26585	5.25807
GSE36376_GSM890494	2.88723	2.89083	1.9533	2.71224	2.91319	2.97702	3.07232	2.72351	3.13219	2.76019	3.09369	2.20165	4.51597	2.94805	6.30333	4.01959	3.60319	4.41967	2.54549	3.15587	3.04681	4.29321	2.7775	4.51073	3.17676	2.87396	3.55195	3.4394	4.39422	2.82023	2.30782	3.0513	3.97275	5.13337
GSE36376_GSM890496	4.06139	3.24847	3.65381	2.82012	2.74707	2.88733	2.81576	3.4129	3.2589	2.6162	6.39515	2.70064	6.32327	2.66348	6.75917	5.68488	4.30716	4.21487	2.64297	2.32921	4.52111	5.81385	3.18382	4.95894	5.58961	2.41818	3.09644	2.15355	7.51469	4.46241	2.47433	6.10558	3.01258	6.70779
GSE36376_GSM890498	3.41561	2.78482	2.47931	3.1049	2.22982	2.78581	3.67814	3.32321	3.1248	2.73006	2.77395	2.93496	4.28637	2.18081	6.56702	3.88294	3.00827	4.72063	2.73193	2.9929	3.35154	3.88135	2.81995	3.89153	3.10171	2.82322	3.55178	2.90039	3.74969	2.45752	2.22594	3.08563	3.07052	5.88122
GSE36376_GSM890499	3.45694	2.80447	2.3719	3.013	2.59858	2.50477	2.78458	4.02517	3.09945	2.44203	3.64123	2.78776	4.38854	2.73945	5.40827	3.63013	4.03712	4.0621	2.96422	3.00129	3.0618	4.38763	3.12339	3.71655	3.31454	2.777	2.89203	2.81431	3.67531	2.74543	2.44491	3.37193	3.41466	5.03687
GSE36376_GSM890502	2.94948	2.42281	3.02285	2.79634	3.03156	-2.50408	2.96931	3.39909	3.09186	2.62607	4.03534	2.62399	4.98211	3.34393	5.90201	5.57686	3.20892	4.05206	2.2416	3.34482	3.1291	4.34037	3.5681	4.55473	2.73873	2.67539	3.49659	2.67568	7.01837	2.71132	2.43772	2.86852	3.02396	6.44473
GSE36376_GSM890504	3.18146	2.69162	2.80621	2.61308	2.69238	2.87035	2.84276	2.44068	3.79502	2.57784	2.95587	2.22778	5.58157	2.62054	7.04188	4.91789	3.39096	7.07475	2.52199	3.48136	2.89896	4.15212	2.78545	3.74689	3.9312	2.97639	3.18969	2.84651	3.46743	2.84004	2.65964	3.23696	4.24771	7.07565
GSE36376_GSM890507	3.50371	2.81289	2.81779	2.65578	2.39663	2.57474	2.49415	3.10569	3.61135	2.61337	2.79589	3.0917	4.31985	2.878	8.55179	5.5627	3.06266	4.23037	2.77564	2.82253	3.00571	3.86117	2.72071	4.65363	3.61653	2.4693	3.10725	2.84003	3.79988	2.82571	2.47274	3.64471	2.51004	6.04743
GSE36376_GSM890516	2.77975	2.98142	2.53835	3.02781	3.19982	2.79879	2.91125	2.53511	3.22074	2.70831	2.82417	2.71944	4.63746	2.6564	7.80806	4.20209	3.37151	6.35654	2.47946	3.29821	3.31183	3.87917	3.48833	4.62529	3.36774	2.73969	3.41791	2.65743	3.54563	2.23406	2.53469	3.53573	3.97079	5.84586
GSE36376_GSM890517	3.1253	4.24718	3.04887	3.21374	2.95102	3.03021	3.27055	3.20817	3.04392	2.47063	4.75874	3.0633	5.86438	2.35212	7.30358	3.66768	3.99505	7.37624	2.43465	2.92718	4.54685	5.33874	3.09908	5.32705	4.49771	3.58928	3.45768	2.58127	5.83068	2.6143	2.28002	3.89232	4.47093	6.14711
GSE36376_GSM890518	3.98614	3.65836	2.75665	3.25262	3.09929	2.81265	3.06848	3.2665	3.26813	2.59814	4.3455	2.76932	4.57616	2.4239	6.58228	5.19597	4.02328	4.9385	3.20105	2.94849	3.84367	4.7786	3.15247	4.86119	3.3413	3.58536	3.1131	3.06639	4.24715	2.70823	2.40741	3.10448	4.11477	5.1704
GSE36376_GSM890520	3.50349	2.55786	2.11586	2.33359	3.06296	2.64469	3.1292	2.93469	3.29681	2.636	3.80325	5.63877	4.21334	3.02861	6.38837	6.11366	3.73644	6.71137	1.99565	2.44081	3.8246	4.27269	3.10307	4.8718	3.50662	3.2942	3.38639	2.57609	5.08777	2.75235	2.4149	3.54557	3.50366	6.78098
GSE36376_GSM890521	5.90053	2.76513	2.41369	2.86183	2.34553	2.91362	3.3306	3.48462	3.47936	2.59881	3.44592	2.61016	5.24883	2.3693	6.7265	4.97355	3.80364	4.03172	2.99825	2.89374	2.97646	4.36373	2.80939	4.27958	4.68805	3.15455	3.10326	2.6227	3.72215	2.65521	2.80257	3.35975	3.41884	5.3425
GSE36376_GSM890522	2.6944	2.65103	2.76526	3.48543	2.2467	2.63216	3.01171	2.19195	2.88491	2.54059	3.37645	2.82238	4.98734	2.87171	6.72384	4.27461	3.51657	8.3133	3.05283	2.3315	3.34209	4.34798	3.31846	5.40219	3.17849	2.69702	3.65496	2.69827	4.45818	2.33465	2.38957	3.29203	3.16019	4.41108
GSE36376_GSM890524	4.45568	3.94855	3.48217	3.22557	2.56736	2.9595	3.45118	3.3199	3.22396	2.64595	3.39062	4.43606	5.90763	2.46834	6.69954	3.60741	4.01329	4.37555	2.97656	3.38962	5.06217	4.58958	3.12918	4.9172	3.91849	3.46467	3.2675	3.75254	4.18866	2.46965	2.37375	5.86279	3.85041	5.24826
GSE36376_GSM890525	3.66113	2.71152	2.64937	2.74477	2.37519	2.85938	3.30039	3.25885	3.27653	2.64187	3.09927	2.92144	5.27713	2.6846	6.25859	4.54585	2.93736	5.00562	2.9757	3.92372	2.88713	4.40746	3.19056	4.06636	6.06471	3.44803	3.21049	2.50211	6.95879	2.9411	2.46839	3.62861	3.42233	5.8162
GSE36376_GSM890527	3.17399	3.81562	3.31147	3.03333	2.65996	3.07138	3.49774	2.69152	3.33122	2.61465	4.75751	2.45102	6.01058	2.80437	6.63511	5.31434	3.82518	5.07939	2.62117	3.04311	4.23331	5.65485	2.401	5.12967	2.93264	2.75283	3.25565	2.55116	6.96329	2.89098	2.44962	3.74222	3.0616	6.15558
GSE36376_GSM890528	3.26639	3.85375	3.62718	3.02458	2.64393	3.07363	3.04412	1.82294	3.27888	2.63322	3.39168	2.93627	4.27707	2.9825	6.2859	6.08855	4.84758	7.2586	2.94894	2.8169	3.32939	4.39258	2.92789	4.28751	3.34687	2.53625	3.91806	2.78994	5.98127	3.0003	2.79542	7.2447	3.90797	6.4574
GSE36376_GSM890529	3.3727	3.15359	3.17421	2.96844	2.76067	2.8399	3.70206	3.11103	3.60964	2.65871	3.59915	2.74615	5.64659	2.60147	7.02915	4.63883	3.96609	5.05524	2.81235	3.13874	3.65988	4.80164	3.28092	5.56045	3.89328	3.7611	3.05545	3.50442	4.82285	2.60302	2.47034	3.37449	3.79634	6.8189
GSE36376_GSM890530	2.96751	2.7423	2.99948	2.8676	3.04606	2.82065	3.07095	3.60128	2.97149	2.89253	3.10699	2.71006	4.79218	3.02921	6.33659	3.50373	3.74887	6.163	3.0815	3.34047	2.83957	4.09933	3.03594	3.84404	3.27325	2.8046	2.59625	2.37512	3.12651	2.89578	2.60508	4.01739	3.57419	4.96094
GSE36376_GSM890532	5.33072	2.41773	2.9927	2.49888	2.81665	3.263	3.63929	3.49728	3.51444	2.49228	3.30753	2.38094	5.12029	2.71767	6.21461	4.13173	3.4131	5.75452	2.80008	2.74173	3.04681	3.93738	2.74003	4.32178	3.96794	2.81293	2.97413	2.77014	5.78029	2.50792	2.57129	3.36153	4.13494	4.84329
GSE36376_GSM890533	3.53052	2.6913	2.73142	2.5454	2.83514	3.1503	2.5689	3.87672	3.43957	2.53627	4.49193	2.74409	5.41366	2.65269	5.63364	4.15944	3.6216	4.1756	3.39079	3.09151	3.25751	4.35627	3.13445	4.79167	3.35882	3.05724	3.27252	2.80643	4.79413	2.95116	2.33483	3.84984	3.75148	5.89876
GSE36376_GSM890535	3.21713	2.52606	2.64469	2.67685	2.2584	2.90318	2.8569	2.76876	3.62941	2.56165	3.80249	3.26251	4.70338	3.01949	7.10781	5.44706	4.21425	10.4824	3.22718	3.17879	3.44731	4.54598	3.1907	4.2911	3.32701	2.30566	3.66259	2.54269	4.34575	2.19059	2.43286	3.4773	4.00053	6.51675
GSE36376_GSM890536	4.02142	2.79794	2.46841	2.32037	2.70258	3.17592	3.21215	3.33209	3.37726	2.55521	2.95852	2.49071	4.56611	2.37171	7.11113	4.45206	3.18753	10.6096	2.68428	2.35514	3.26612	4.30196	2.82301	3.19896	2.88029	2.18653	3.11294	2.62377	2.88388	2.47021	2.44294	3.16239	2.34384	4.17055
GSE36376_GSM890541	3.54723	2.68221	2.6971	2.52697	2.62739	2.65043	2.93913	2.98948	2.9427	2.53274	3.55522	2.43921	4.66756	2.43365	6.88043	3.96982	3.41338	4.42215	2.47987	2.71755	2.99509	4.90288	2.93921	3.90606	3.52868	2.61622	3.42328	2.86111	4.00222	2.94401	2.46097	6.4553	3.02114	6.07119
GSE36376_GSM890542	2.81787	2.82807	2.41353	2.84831	2.83459	2.55177	2.84572	3.02972	3.1603	2.7411	4.14172	2.78025	5.43689	2.61703	7.75255	4.38728	3.23544	6.11466	2.16821	2.68346	3.23147	5.11384	2.44387	5.19887	3.37682	2.77591	3.4989	3.12376	4.26197	2.61104	2.68215	4.0027	2.57434	5.42004
GSE36376_GSM890543	3.4448	2.82072	2.08017	2.98996	2.94992	2.66606	2.90215	2.98766	3.54425	2.72972	4.87409	2.99743	5.63481	3.01101	6.87735	3.31664	3.51531	6.1205	2.26527	3.03733	4.32526	5.53421	3.32111	5.50073	4.9137	3.31318	3.39161	2.95802	5.87509	2.72972	2.33226	3.74293	3.99841	5.98657
GSE36376_GSM890544	3.36252	2.49591	2.43304	3.02618	2.97812	2.72763	2.91156	2.12148	3.35348	2.68955	3.04128	2.30655	4.74485	2.5302	5.63144	3.98766	3.7392	5.19267	2.96728	2.74014	2.96186	4.19409	3.42553	3.32158	4.20095	2.6055	3.07563	2.56133	3.54716	2.95808	2.55182	3.63935	3.28483	5.26532
GSE36376_GSM890546	4.66949	3.82035	3.21688	3.29248	2.70534	2.73085	3.17589	2.96931	3.30832	2.71617	4.1787	3.64283	5.26584	2.90453	6.04163	4.42826	3.78987	5.91483	1.48817	3.07132	4.88837	5.2098	2.80357	5.0672	3.04017	2.57977	3.33227	2.71686	5.12692	2.50555	2.43773	4.22697	3.48293	5.26428
GSE36376_GSM890549	5.43646	4.98746	3.77227	3.2179	3.10511	3.38485	3.6823	2.87386	3.38186	2.51501	5.29891	5.5554	6.88982	2.72061	7.44077	4.34268	3.54279	6.14357	2.67804	4.1565	5.09264	6.56593	2.82248	6.3608	4.46637	3.68336	3.43767	3.29552	5.95285	2.76225	2.35548	3.58952	3.24713	6.07191
GSE36376_GSM890550	4.88549	3.48673	3.04592	3.32159	2.84217	2.90218	2.85729	3.17037	3.28977	2.71659	4.67789	3.5072	4.81233	2.7329	6.5374	5.64915	3.45459	4.33543	2.57776	3.32831	4.38078	5.54584	3.51704	5.68258	3.19872	3.46248	2.98744	3.23067	4.32498	2.46995	2.43933	2.93129	4.12826	5.55961
GSE36376_GSM890551	3.50742	3.06985	3.16632	2.54303	2.26531	2.79698	3.36347	2.63981	3.49512	2.56101	4.64939	2.76065	6.2435	2.19883	6.62046	4.8265	3.36129	4.46188	2.73411	2.94694	3.38069	6.07568	3.15247	4.59653	3.74	3.73755	3.12294	2.71534	5.53517	2.70871	2.46695	4.11469	4.21923	6.17554
GSE36376_GSM890552	3.74018	2.59897	4.61164	2.63608	2.99367	2.83287	3.02298	3.42365	3.56424	2.51327	2.64782	2.54735	3.85063	2.30035	7.01017	5.63476	3.57922	5.3031	2.19277	2.74201	2.98438	4.11952	2.80992	3.92322	2.96513	2.20336	3.42303	2.81677	4.70766	2.74233	2.36999	3.15015	3.54977	7.21018
GSE36376_GSM890553	2.65197	3.91157	2.61647	3.29362	2.7203	2.60179	3.04573	3.05582	3.3211	2.47134	4.0663	3.28604	5.19302	2.62384	7.20343	5.36547	3.63625	7.87987	2.64341	2.54759	4.26305	5.16433	2.45535	4.42092	3.42823	2.27228	3.3017	3.12928	4.15889	2.97832	2.30182	7.10694	3.16328	6.23321
GSE36376_GSM890556	3.93997	2.45504	2.9791	2.39802	2.48302	2.8973	2.28231	2.75221	3.25476	2.61724	3.12882	2.43652	5.85794	2.31383	6.12962	4.48249	3.28164	6.11649	1.62795	2.63194	3.28119	4.72652	3.08537	4.25726	3.64754	3.24803	3.09701	3.03837	3.88736	3.31959	2.44657	3.56072	3.26217	6.79263
GSE36376_GSM890557	3.0777	2.64826	2.33222	3.34739	3.70313	3.08314	1.93008	3.37869	3.23663	2.60553	3.52988	4.97121	4.95506	2.43311	6.69954	4.68518	3.64066	7.22983	2.75828	2.79747	3.63601	4.26846	2.86142	4.32878	3.19148	2.85421	3.30809	2.66407	4.16039	2.37475	2.57909	4.47357	3.18753	5.38558
GSE36376_GSM890558	3.83115	3.07578	2.40672	3.32953	3.17298	2.89919	2.19734	2.94621	3.44203	2.4377	3.67032	2.20782	4.21796	2.90626	6.83683	4.29287	3.61221	7.42305	2.64688	2.52163	3.06472	4.1432	3.04579	3.59087	3.93989	2.74903	3.33378	2.70092	4.30162	2.85489	2.63742	3.41546	3.57579	4.72519
GSE36376_GSM890560	4.1472	3.22582	2.83309	2.63809	2.86793	2.76674	3.53696	2.67234	3.5912	2.66451	4.03428	2.52768	3.33174	2.84991	6.75522	3.54936	2.68404	9.87423	1.81519	2.77882	3.81052	4.7533	2.58533	5.34062	3.482	3.40911	3.33255	2.98096	4.177	2.76629	2.6757	3.48158	4.03647	5.13042
GSE76427_GSM2011285	3.64402	2.19059	2.58209	2.28061	2.18254	2.93126	2.81172	3.37195	2.9067	2.49089	2.35946	2.21307	4.26569	2.77461	6.82528	3.81168	3.44046	4.76066	2.5975	2.41734	2.87197	3.62306	2.55053	2.41307	5.20544	2.73354	4.09824	2.65523	3.44692	2.90088	2.65334	3.52409	3.06309	5.9317
GSE76427_GSM2011286	3.0777	2.81587	2.90969	2.75001	2.56155	2.92699	2.86306	3.41688	3.15009	2.62972	3.93422	1.96638	3.60479	2.83401	5.86088	4.99355	2.84575	5.38906	2.23523	2.83826	3.52408	5.57105	2.7934	4.30355	3.12744	3.22645	3.49916	3.10888	4.20521	3.12093	2.543	3.38829	2.85793	4.9432
GSE76427_GSM2011288	3.81312	2.72602	2.69413	2.67394	2.80445	3.03229	2.81094	2.39274	3.30861	2.75166	4.65092	2.28452	4.88573	3.01348	6.39303	4.34023	3.73691	4.12628	2.79184	3.06366	3.35404	5.24894	3.8885	4.79987	3.75816	3.46118	3.40139	2.92905	7.74748	2.7066	2.29988	3.43995	4.17838	5.79141
GSE76427_GSM2011289	3.17285	2.86201	5.62251	2.61584	2.86993	3.08022	2.872	3.12528	3.17385	2.6046	3.34955	3.55552	5.86609	2.45787	6.10689	5.35244	4.03164	4.21741	2.49072	3.0778	3.7703	5.38564	3.44497	3.94459	3.26859	3.08896	3.54824	2.82621	4.64523	2.70739	2.47876	3.53918	4.25463	6.26559
GSE76427_GSM2011293	5.90751	2.79633	2.58399	2.67764	2.89657	2.95815	2.91254	2.94519	3.81853	2.68684	2.85804	2.49174	5.3887	2.85499	8.17467	6.46371	3.35613	6.59649	2.58083	3.24142	2.72705	3.55352	3.12426	3.54856	2.89753	2.77963	3.14298	2.67093	5.23539	2.99091	2.67424	3.40261	4.01907	6.77047
GSE76427_GSM2011294	3.2792	2.62357	2.60295	2.94849	2.79629	2.8443	2.94006	2.68767	3.27277	2.76384	3.33653	2.07979	5.24657	2.62675	6.3388	4.7824	3.9614	4.99238	2.2691	3.22951	2.7354	4.22468	2.28534	4.03801	3.27852	3.24091	3.04868	2.7931	3.90284	2.6815	2.7062	3.5214	3.8359	4.38898
GSE76427_GSM2011296	3.61729	2.30066	2.50275	2.4908	2.35393	2.92972	2.71631	2.53878	2.89455	2.53143	2.42499	2.97237	4.52011	2.39335	7.25469	4.29643	3.50914	9.96789	2.68655	3.15859	2.99896	3.39507	2.85867	2.64485	5.43352	2.8566	4.62525	2.86794	3.24887	2.94453	2.39389	3.44811	3.71916	6.02615
GSE76427_GSM2011312	3.40914	2.54162	2.6815	2.81788	3.55616	1.25258	2.86053	2.84214	3.28998	2.67934	3.52804	3.14449	5.03116	2.85521	6.64575	4.64059	3.97358	6.88143	2.6969	2.99161	3.12421	4.20254	3.86927	3.37805	3.65529	2.63138	3.48336	2.59392	4.93537	2.19792	2.64629	3.49076	3.44611	4.50413
GSE76427_GSM2011313	2.96641	4.7009	4.17614	4.10441	3.4313	2.97334	3.85381	2.93802	3.31942	2.89604	5.19244	5.5454	4.31827	2.69898	6.42807	3.80602	4.70234	3.99835	2.85628	3.88808	6.70658	6.72349	3.72442	7.08143	3.59228	3.32862	4.70503	3.9705	6.35622	2.1231	2.39007	3.57054	3.11662	5.86267
GSE76427_GSM2011315	3.94137	2.95249	2.52557	2.94614	2.86537	2.73059	3.13946	2.42987	3.52749	2.75527	3.69117	3.08576	4.09904	3.21553	7.30743	3.41529	3.81825	4.7267	3.11765	2.68816	3.38257	4.54663	3.81046	3.48062	3.07009	3.30528	3.48783	2.81656	5.09084	2.36445	2.60701	3.58406	3.6063	5.04926
GSE76427_GSM2011316	4.89472	2.59679	2.77869	2.93839	2.86972	2.87053	2.66722	3.26128	3.22371	2.74789	3.26874	2.62662	5.28848	2.81423	6.2136	5.06668	4.50329	4.42419	1.53895	2.21706	3.4052	3.78535	3.72346	3.26143	4.60636	2.80621	3.54447	2.76577	4.24666	2.46001	2.46369	4.05039	4.60364	5.45196
GSE76427_GSM2011318	3.31014	3.08436	3.24457	2.80222	2.74333	2.63497	2.76235	3.07767	3.13369	2.62641	3.88616	2.88292	5.33031	3.06305	7.05972	6.03445	4.00766	6.9194	2.96593	2.98985	3.27884	7.87143	2.97974	4.55941	3.57098	3.23389	3.87439	2.75569	6.51209	2.96285	2.54361	2.78263	3.04863	6.35348
GSE76427_GSM2011321	3.36485	3.6601	2.86359	3.3993	3.57985	3.00358	4.56193	2.38061	3.48413	2.52846	5.07833	3.50958	6.29295	2.82306	6.90926	4.17069	4.65586	7.65438	2.50975	3.9082	3.93519	5.57937	3.46225	4.87384	3.37641	3.66259	3.49185	2.75502	5.65901	2.99077	2.39195	3.39837	3.56714	6.1926
GSE76427_GSM2011322	3.83931	2.58356	2.41154	2.38295	2.80305	3.08202	2.19351	2.7855	3.51817	2.7037	3.17313	4.70611	4.82532	2.44683	6.16582	4.80037	3.1497	5.17483	2.07824	2.31267	3.07842	4.95908	3.396	3.58381	2.86983	2.77572	4.33801	2.69402	3.73916	2.57013	2.51837	3.66193	3.11114	4.20948
GSE76427_GSM2011324	4.13766	3.09256	4.0798	3.08831	3.06709	2.95927	2.87298	3.56652	3.24194	2.61007	4.07449	2.6015	5.56072	2.45718	5.90113	5.25496	3.40577	5.43318	3.22012	2.48265	3.65827	7.20027	2.4282	4.33135	4.49154	2.11805	3.53549	2.66169	5.37161	2.82333	2.50174	3.81968	3.14425	6.13384
GSE76427_GSM2011325	2.32312	3.14751	2.56672	3.10121	2.92665	3.23561	2.72613	3.95137	2.90064	2.62996	4.46141	2.45564	4.13449	2.59233	8.56918	5.97519	4.20067	7.8202	2.57134	3.44587	4.13855	5.4109	3.00785	5.17967	2.88685	2.83749	3.56633	2.76762	6.65876	2.51615	2.67193	2.91911	4.3818	6.66844
GSE76427_GSM2011326	2.85483	2.64552	3.04658	2.9428	3.10719	2.53253	2.79945	3.32012	3.31992	2.52569	3.60123	2.99851	5.75014	2.52207	5.16317	4.84282	4.41768	5.4778	2.58171	3.25871	3.96624	4.87881	3.04442	4.94664	3.17283	2.63536	3.74447	2.84906	4.64068	2.31963	2.53623	2.64298	3.88343	7.12219
GSE76427_GSM2011330	3.87027	3.72162	2.76944	3.13781	3.37571	2.88177	2.92428	3.35562	3.83289	2.67858	4.10555	2.67202	5.6501	2.64794	7.64641	5.65392	3.84571	4.43351	2.71853	2.73133	4.1329	4.74193	2.54616	5.56703	4.54856	3.60286	3.48696	2.82572	6.14288	2.4434	2.52639	3.02057	3.54532	4.86893
GSE76427_GSM2011331	4.88497	3.75546	3.0046	4.1436	3.73389	2.97419	2.88896	2.28443	3.84312	2.84131	4.80735	2.64906	4.40708	2.68145	6.67097	4.00173	3.87702	4.94018	2.63493	2.72448	4.61668	6.2657	3.13132	5.78545	2.92071	2.87256	3.46823	2.88244	5.07219	2.33095	2.57162	2.77714	3.88308	5.52928
GSE76427_GSM2011334	2.73544	2.19487	3.11057	2.65808	2.54739	3.00882	2.50674	3.77925	2.96388	2.62545	3.04708	3.08047	5.84206	2.39019	7.53134	4.35202	3.65534	7.23707	2.43978	3.16678	2.57872	3.89893	2.7975	3.26172	3.53599	2.41031	3.19723	2.9726	4.43969	2.86552	2.25507	3.85282	3.17569	5.34579
GSE76427_GSM2011335	2.5473	3.87422	2.51193	3.66616	2.81596	2.962	3.26686	2.13578	3.22555	2.61279	3.52362	3.8295	5.67064	3.27239	7.00293	4.0507	3.7277	5.63561	2.66363	3.13724	5.0941	4.96535	2.93885	4.9151	3.62985	3.19982	3.34516	2.83633	4.71616	2.93927	2.43178	4.97877	3.87998	5.47411
GSE76427_GSM2011340	3.1568	2.76718	2.31573	2.98733	2.98173	3.0382	2.80779	2.76878	3.55062	2.58816	3.67594	2.76985	4.99118	3.19128	6.29683	5.48219	4.4056	5.21069	2.4844	2.93815	3.22825	3.66745	2.69748	4.65998	4.45999	3.04815	3.4231	2.77446	3.26737	2.48806	2.21308	3.19688	3.3861	5.70626
GSE76427_GSM2011342	5.4515	3.3213	2.79817	3.09931	2.8682	2.92798	2.69584	3.59454	2.64096	2.77003	4.27222	2.7175	5.3887	2.64734	6.85317	4.61583	3.48797	5.77773	2.53161	2.29429	3.66774	6.61852	2.73497	4.02591	3.82441	2.59732	3.17784	2.66676	3.73694	2.77365	2.43914	3.11773	3.49193	5.60103
GSE76427_GSM2011343	6.41888	2.90892	2.85988	2.82159	2.79868	2.94688	2.59482	3.79189	3.54461	2.7307	3.72919	2.36476	5.4512	2.72162	5.99957	3.97054	4.04273	5.71082	2.28294	2.94382	3.33623	4.5449	2.48686	4.08408	3.3714	2.53555	3.38093	2.74575	5.58938	2.78232	2.68861	3.03312	4.29091	5.13067
GSE76427_GSM2011344	3.28953	2.6002	2.87631	2.6851	2.55597	2.96349	3.14223	3.55146	3.68356	2.75674	3.14565	2.45647	4.54356	2.31362	6.43521	4.96794	3.27928	4.76772	2.48786	2.51145	3.10427	5.50544	2.61176	4.19735	3.54383	2.73666	3.4042	2.75582	4.6672	2.42596	2.48626	2.71955	4.00261	4.81703
GSE76427_GSM2011345	2.93098	2.92519	2.66556	2.99281	2.87478	1.25258	2.75728	3.00043	3.14808	2.60354	4.02097	3.52235	5.11007	2.23107	6.91823	5.05173	5.14586	6.06327	2.45066	3.14084	4.37757	5.01334	3.22402	4.30428	4.37565	3.14716	3.65676	2.75615	5.02673	2.25797	2.28631	3.26153	3.22691	5.40298
GSE76427_GSM2011346	4.9712	2.47021	2.52325	2.91725	2.76802	2.92674	2.762	2.23232	4.02931	2.62094	2.95872	2.29776	4.44313	2.33848	7.41554	4.96305	3.52236	6.52531	2.55067	2.89902	2.92995	4.09819	3.02561	3.29523	5.238	2.52146	3.59008	2.71964	-0.14393	2.1472	2.68374	5.06486	2.95619	5.28608
GSE76427_GSM2011347	2.78146	2.50394	2.33347	2.77295	2.6336	3.00125	3.0243	2.76298	3.03969	2.65792	2.83214	3.65519	4.07818	2.65589	4.93887	4.50573	3.58842	4.33949	2.57102	2.89354	3.12877	4.59779	2.60686	3.69618	3.58926	2.4034	4.53034	2.77685	2.89276	2.89552	2.56711	5.8573	3.636	7.46897
GSE76427_GSM2011349	3.46624	2.84832	2.30722	2.8316	2.92834	3.07782	3.34295	2.99307	3.84026	2.4478	4.27463	2.81018	5.6501	2.89949	6.18227	4.83333	3.96304	8.9551	2.90084	2.65021	3.50765	4.32698	2.82186	4.86394	3.81288	3.3062	3.49135	2.74177	7.16483	2.19002	2.46355	3.20491	3.43033	4.80055
GSE76427_GSM2011351	4.61007	3.84806	3.90554	4.01504	3.26023	2.42216	3.36811	3.03753	2.96046	2.70989	4.38486	3.21659	5.06707	2.88424	6.36879	4.13213	4.9663	5.81685	2.67034	2.87219	4.72888	5.40203	3.35743	5.17006	3.51905	3.55109	3.77481	2.93627	5.21741	2.68551	2.27715	3.20148	3.31489	5.80756
GSE76427_GSM2011353	3.65216	3.58653	3.76845	3.36767	3.1629	2.74675	3.08189	3.63549	3.82044	2.61864	4.38668	4.65062	5.18748	2.84959	7.18721	4.77036	3.9177	4.62951	2.59717	2.77597	4.24787	5.05363	2.85552	4.64995	3.2905	3.01587	3.9713	2.85446	4.52281	2.5681	2.36451	3.57018	3.15822	6.17737
GSE76427_GSM2011354	3.47833	2.46235	2.80134	2.72481	3.50356	2.71429	2.7812	3.06807	3.19472	2.61822	3.13498	2.3845	5.6501	2.89547	7.46262	4.09676	3.65979	7.87494	2.62912	2.62347	3.13449	5.22579	2.81422	3.57098	3.67069	2.49414	3.3801	2.80675	3.8103	2.71607	2.63016	3.82568	3.16396	5.76523
GSE76427_GSM2011355	4.74495	2.99301	2.7986	2.71539	2.63635	2.82537	3.23384	3.29541	4.01112	2.64247	4.14858	2.24135	6.20069	2.96115	6.11101	4.85449	4.58821	5.45707	2.87209	2.4637	3.80438	4.28226	3.25646	5.17295	3.82944	3.7343	3.56759	2.88168	7.06198	2.51988	2.5617	3.10196	3.30231	5.07038
GSE76427_GSM2011362	3.59679	2.77984	2.65078	2.72312	2.68296	3.13193	3.0602	3.28903	3.75553	2.66172	3.44684	2.8815	5.71287	2.14647	7.79635	5.06344	4.20374	4.41016	2.8946	2.88764	3.33755	4.65513	3.09469	3.57016	4.38217	2.82506	3.50146	2.50374	4.62148	2.45555	2.52726	3.88638	4.53689	5.18201
GSE76427_GSM2011363	3.14174	4.8715	2.59768	2.85244	2.93589	3.30644	3.05921	3.11047	3.25168	2.49998	3.81984	2.79508	5.26774	2.92068	5.91216	5.5223	3.50195	5.31348	2.70827	2.68038	3.47373	4.70489	3.03185	3.96666	4.12562	3.04669	4.41781	2.85935	4.74778	2.84315	2.58537	3.96779	3.01783	5.74966
GSE76427_GSM2011364	3.43295	2.81615	2.90072	2.85977	2.99351	1.85575	3.1586	3.33529	3.09849	2.68545	3.61714	2.83411	5.81959	2.62723	5.92335	4.18105	4.43119	7.33539	2.60943	2.58742	3.74646	4.49713	2.6087	3.86914	4.09246	2.46089	3.24265	1.27934	4.20993	2.81137	2.5805	3.81103	4.20215	4.98311
GSE76427_GSM2011366	3.20536	2.64525	2.98654	2.59216	2.60895	3.02925	2.81713	2.94967	2.80189	2.79761	3.43232	2.30369	4.99118	2.60591	6.90316	6.39178	3.88397	4.50774	3.05074	2.29789	3.36097	4.9504	2.80301	3.63111	3.54618	2.52345	3.49102	3.03701	4.20005	1.96196	2.39972	4.87566	3.4564	5.63363
GSE76427_GSM2011369	2.99589	2.38687	2.97192	2.79344	2.92433	2.88604	3.03698	2.9839	3.46427	2.75425	3.21451	2.66307	5.3511	2.30618	7.00293	3.8201	3.43829	4.63443	3.07706	2.82661	3.11698	4.32377	2.58392	3.42307	4.44808	2.49041	3.27969	2.53944	3.79604	2.57647	2.61204	3.49959	4.10658	5.8737
GSE76427_GSM2011370	3.2914	2.64381	2.55214	2.77786	2.94348	2.69946	3.09607	3.00824	2.95526	2.7094	3.3212	2.79694	5.16705	2.83076	5.6926	5.78059	3.5554	4.40699	2.95613	2.94699	3.13179	4.43101	2.90934	3.67892	2.67282	2.88004	3.11247	2.81262	4.16631	2.57512	2.46274	3.03205	3.75665	5.242
GSE76427_GSM2011372	5.14468	2.33803	3.36532	2.67348	2.72329	3.00235	2.83039	2.54491	3.39502	2.59262	3.22603	2.53905	5.12816	2.60136	6.8564	5.28486	2.99701	6.00797	2.485	2.37607	2.95012	4.19792	3.09746	3.34243	2.79377	2.39408	3.32373	2.81998	4.33098	2.35196	2.71354	3.12078	4.11436	5.26777
GSE76427_GSM2011373	3.48977	3.10092	2.81508	2.91691	2.8855	2.83176	3.09853	3.05282	3.02987	2.70016	3.44266	2.96225	6.22138	2.89177	6.13322	5.14239	3.99709	4.92042	2.63549	3.24795	3.65831	4.84396	2.92084	3.65569	4.87222	2.41725	3.14649	2.61275	4.07487	2.72128	2.60057	3.35436	3.08952	4.58309
GSE76427_GSM2011377	2.71901	4.46156	2.68996	2.6557	2.76254	3.19223	2.64792	2.52197	2.83878	2.46002	3.36996	2.78828	5.11007	2.61196	6.0328	4.55102	2.54516	4.73052	2.29074	2.45241	3.07572	4.18643	2.945	3.33157	3.56395	1.9131	3.60328	1.72617	4.30493	2.73629	2.66982	4.76118	2.89434	5.54322
GSE76427_GSM2011378	3.4051	3.23736	2.88987	2.98203	3.15315	2.25658	4.02382	2.62742	3.23609	2.62422	4.1185	2.77333	5.11007	2.56398	5.93456	5.61768	4.23433	5.69644	2.59514	3.20374	3.51227	4.9333	3.43646	4.76798	3.0638	3.19091	3.36891	2.80978	5.06723	2.66576	2.63228	4.19025	3.80039	5.91582
GSE76427_GSM2011380	1.93467	3.17639	2.77838	3.10415	2.92814	2.80181	3.06435	3.88315	2.91575	2.70251	3.51481	4.57565	5.28848	2.76146	6.48955	5.17255	3.72424	5.88249	2.75138	3.1516	3.64826	6.44274	2.75064	4.04821	4.8563	2.98949	3.44154	2.80671	4.66807	2.5417	2.51655	3.55692	2.29245	4.94477
GSE76427_GSM2011382	3.42772	2.68661	2.64645	3.15278	2.72818	-0.461364	2.76188	2.94543	3.05715	2.66445	3.31344	2.8618	6.00782	2.49252	6.51849	4.52991	4.26266	4.48806	2.89728	2.74731	3.27627	4.19766	3.12143	4.25105	3.32279	2.90927	3.3908	2.98989	4.54352	2.47481	2.54715	4.78118	2.88063	4.3881
GSE76427_GSM2011383	3.81941	2.97833	2.57129	2.96828	2.54506	2.78734	2.86103	2.77148	4.23978	2.69232	3.97321	3.53215	4.26569	2.63468	5.79529	4.28024	3.90619	7.78558	2.2171	2.88165	4.30605	5.43843	3.22568	5.60373	4.25708	3.55793	3.67395	2.8846	5.66408	2.65751	2.3761	3.28061	3.54504	6.22844
GSE76427_GSM2011385	3.00892	2.62266	5.68161	2.71897	2.99875	2.97175	2.87069	2.19467	3.33934	2.47849	3.72492	2.53108	4.15525	2.97906	6.79794	5.50006	3.10844	3.87524	2.24988	3.24871	3.17409	4.75107	3.46403	3.52948	3.05239	2.76947	2.85254	2.60691	5.78261	2.64239	2.47215	3.01004	3.54383	6.78801
GSE76427_GSM2011391	3.53836	2.85334	2.72287	2.64693	2.57101	3.01924	3.07389	2.78704	3.0524	2.52788	3.94997	2.86398	5.24657	3.09103	6.1046	5.33211	3.76706	5.032	2.25737	2.18169	3.91187	4.63683	3.15959	5.07877	3.95261	2.95113	3.50709	2.82406	5.10777	2.84302	2.51914	4.74815	3.19517	6.31563
GSE76427_GSM2011393	4.6097	2.61155	2.6662	2.84031	2.83851	2.81084	3.02335	2.73871	3.85083	2.53848	3.57677	2.71207	6.0796	2.56106	7.2877	5.24953	3.83307	6.56909	2.39649	3.25356	3.39915	4.65504	2.96564	3.79043	3.33895	2.96487	3.32506	2.73601	7.99324	2.90859	2.47057	3.27406	3.46803	5.5865
GSE76427_GSM2011398	2.60818	4.56294	2.96635	3.98787	4.33722	3.41588	3.34285	3.29588	3.42991	2.72862	6.54146	3.2316	4.35594	2.72643	7.54996	3.78804	4.85326	6.00797	3.31954	3.52572	4.76354	7.62381	4.99296	7.35371	3.98588	3.29386	3.73971	3.48766	6.27972	3.2961	2.46723	4.27809	2.87111	6.74409
ICGC_DO23508	4.25264	2.52029	2.72408	2.67878	2.66624	2.56135	3.08385	3.70371	3.29457	2.62076	3.91624	2.59597	5.38891	2.51766	5.58382	5.19894	4.22512	3.74813	2.57051	2.66079	2.75846	5.24731	3.34412	3.6838	4.05717	2.59584	3.50026	2.85203	3.89592	2.36671	2.45141	3.22799	2.67324	4.12272
ICGC_DO23509	3.81143	2.31931	2.41171	2.61223	2.57478	2.91891	2.56465	2.57145	2.88024	2.7953	2.8652	2.36236	3.99726	2.47423	6.90688	3.76811	2.98779	4.37449	3.79157	2.44649	3.84032	3.04779	2.50829	2.5222	3.31756	2.39934	2.88364	2.63173	2.57133	2.45656	2.45141	4.64425	2.52092	4.43194
ICGC_DO23510	5.13493	2.87941	2.51188	2.87716	2.62023	2.5886	2.91249	2.71223	3.24509	2.67239	3.78427	2.5822	5.7298	2.69978	6.89061	3.66809	3.61549	2.76391	2.55774	2.5202	3.2713	5.10386	2.87234	4.26866	3.6533	3.35071	3.56169	2.60458	4.72162	2.72934	2.45141	4.18483	3.65977	5.12616
ICGC_DO23511	6.02805	2.37447	2.9292	2.63214	2.55814	2.18315	2.83701	3.67451	4.43045	2.55993	3.09591	2.45659	5.42776	2.66644	6.86543	5.44272	4.0534	4.59785	3.05384	3.0293	2.38828	4.49274	2.90424	3.24136	4.15076	2.28453	3.65711	4.10545	4.66514	2.32921	2.45159	2.33965	2.46238	4.41615
ICGC_DO23513	3.23726	2.51287	4.49439	2.7268	2.59813	2.36502	2.72129	2.7408	3.24551	2.60852	3.09449	2.66119	4.50042	2.53202	7.55673	4.01434	2.92477	5.6691	2.68963	2.36057	3.27165	3.08823	2.97804	2.84756	3.14669	2.29093	3.11245	2.55047	4.84717	2.38022	2.45141	3.9389	2.40714	6.29684
ICGC_DO23514	3.63089	4.41939	5.48465	4.67016	3.93507	4.88961	4.60998	3.12565	3.37375	2.72038	5.05269	3.90103	5.96878	3.04915	6.1206	5.96197	4.54763	8.16991	2.48973	3.29987	5.10857	5.86797	3.73882	6.19185	3.69925	3.75898	3.51841	3.0802	5.95182	2.57823	2.45141	4.51374	4.10441	6.05271
ICGC_DO23519	3.79016	3.39994	2.8473	3.02387	3.29915	2.93205	2.74329	3.52199	3.82551	2.71118	4.90213	2.92559	6.30557	2.81085	6.05239	4.26573	4.41022	5.46907	2.49837	2.85971	3.05323	6.1855	2.88091	5.29685	3.95796	2.92166	3.5357	2.60664	5.41206	2.77686	2.45141	3.61075	3.27239	5.15162
ICGC_DO23521	3.481	3.27552	3.01089	3.09107	3.06569	2.63814	2.954	3.41655	2.64078	2.55976	3.30629	2.812	4.68282	2.56384	5.76326	4.54601	3.48338	7.80912	2.42632	2.49903	3.21994	3.79152	2.88522	3.62172	2.73158	2.67565	5.15147	2.65206	3.63858	2.61506	2.55547	5.65893	3.02663	6.34209
ICGC_DO23523	5.93168	3.8037	3.2668	3.68285	4.20454	4.37294	4.67464	4.39047	4.06597	2.642	6.32678	4.54973	7.29453	3.09866	7.1932	3.5544	4.6972	4.00959	2.49719	3.08946	5.55366	7.99056	3.64229	7.19916	4.55817	3.26926	3.16156	3.20024	7.8337	3.21713	2.92588	3.46483	3.9824	6.43206
ICGC_DO23524	5.57163	3.03399	2.82825	3.10398	3.02629	2.47112	3.03384	2.92112	3.05332	2.69412	4.11391	2.73312	5.17675	2.59467	7.7988	3.56199	4.4463	5.73155	2.49012	2.60555	3.40252	5.8216	3.39196	4.6047	3.62296	2.97807	3.22038	2.48729	5.44441	2.64297	2.57517	5.58821	3.87991	5.53573
ICGC_DO23529	3.29925	2.31075	4.87345	2.55734	2.71171	2.6584	2.61953	2.85132	3.76293	2.62006	2.79574	2.33535	4.27689	2.51302	7.05838	5.17595	3.25889	4.14175	2.47074	2.58486	3.08153	3.95407	2.50895	3.27553	3.0472	2.38904	3.85299	2.52039	5.57321	2.41045	2.45141	3.34785	3.3208	7.41216
ICGC_DO23540	3.12062	3.18401	2.52129	2.68522	2.63147	2.48736	2.77756	2.60538	3.96521	2.55976	2.84474	2.64334	5.22347	2.6401	6.22458	4.97989	3.89182	2.22516	2.42632	3.367	4.03672	4.97549	2.46351	3.48347	4.94083	2.62826	3.64491	2.87105	3.6807	2.486	2.45141	3.24664	2.71182	4.14386
ICGC_DO23542	3.68601	3.3416	3.0462	3.44903	3.26932	3.41095	3.11998	3.28017	3.20841	2.72826	4.31056	3.47459	5.57577	2.67619	5.38559	4.52177	3.75125	5.37208	2.45521	2.87531	4.09728	4.69941	3.16042	4.73217	2.90766	2.68735	3.17731	2.62801	5.45053	2.99464	2.45141	3.84112	3.4922	6.90821
ICGC_DO45091	3.13858	3.71011	3.27965	3.49325	3.11903	3.19122	2.94756	2.71421	3.17717	2.55976	3.71699	2.74244	5.03473	2.75172	6.01918	4.957	4.27622	5.21988	2.48274	3.12982	3.75247	3.92436	3.55575	4.46366	3.296	3.59287	3.15483	2.61445	4.49202	2.88642	2.45141	2.87877	3.79047	5.38382
ICGC_DO45092	3.77793	2.68381	2.70653	2.73849	2.76187	2.34603	2.82484	2.96959	3.15259	2.59661	3.85952	2.52143	5.51287	2.56256	5.66406	4.96594	4.41577	5.79315	2.79495	2.56733	2.90061	6.41051	2.67553	3.70104	3.47975	2.5247	3.43534	2.55623	5.77536	2.38916	2.45141	3.38469	3.5952	5.60954
ICGC_DO45093	4.63653	3.25634	4.36795	3.38792	2.91126	2.93768	3.95193	3.15854	3.45527	3.08626	3.95827	4.2984	5.09375	3.11704	6.81985	4.68992	4.40163	3.71018	3.10258	3.20552	4.99071	5.02894	3.232	4.68503	3.02396	3.05053	3.26913	3.27939	4.86112	3.67683	2.45147	3.76872	3.17234	4.77485
ICGC_DO45096	3.11309	2.61238	2.53245	2.82644	2.73302	2.59727	2.6762	2.63194	3.29822	2.62817	3.42497	2.29469	4.52019	2.59442	6.63074	4.47219	3.02986	2.74706	2.49437	2.52876	3.26568	3.66371	3.27222	3.88413	3.34536	2.92086	3.74388	2.629	3.34371	2.44866	2.45141	3.52492	3.38463	4.1932
ICGC_DO45111	4.25197	2.34339	2.5632	2.60034	3.05001	2.85382	2.56465	2.58228	3.49121	2.74725	3.70982	2.63166	4.69177	2.63017	6.43927	3.93243	2.93446	3.38623	2.42632	2.65502	3.17422	4.00969	3.09729	3.61715	3.16973	2.45529	3.54247	2.53994	3.71533	2.99334	2.45141	3.87872	3.14622	4.9398
ICGC_DO45113	3.11965	2.48155	2.81342	2.62608	2.75095	2.60048	2.56465	2.81425	3.55644	2.68357	3.696	2.43298	5.33513	2.64302	6.29073	4.8154	3.90856	7.49877	2.52939	2.61837	2.39543	4.50445	3.95577	3.31441	3.38079	2.76632	3.30009	2.72141	3.91394	2.53277	2.45141	2.75955	2.84881	5.73981
ICGC_DO45117	3.30892	3.52346	4.02876	3.58241	3.34725	3.55635	3.58123	2.70433	3.57238	2.8968	4.16134	4.72753	5.12864	2.81269	5.15166	3.8656	3.62676	2.39414	2.54892	3.22637	4.78847	4.45062	3.4482	4.61203	3.18199	2.54809	3.27004	2.80656	4.29535	2.78107	2.45142	3.14007	3.27564	4.24273
ICGC_DO45119	3.04878	2.76424	3.13585	2.95019	2.92029	2.97882	2.75292	2.87375	3.33982	2.55976	4.56691	2.39936	5.5541	2.67598	5.82165	5.25824	3.30993	7.56659	2.54671	2.59668	2.59298	4.28474	4.24249	4.09348	2.86935	2.74152	2.74854	2.42348	4.91638	2.9635	2.52591	4.37133	3.36936	6.0458
ICGC_DO45121	2.60763	3.0547	2.79688	3.03243	2.84292	2.58431	2.8814	2.57185	3.89236	2.55976	3.56021	2.988	4.97325	2.65987	6.7601	3.89518	3.99503	6.89283	2.49811	2.63719	3.9025	4.29772	3.48084	5.04117	4.22026	3.74372	3.83958	2.67062	4.62532	2.68335	2.45141	4.50136	3.75272	5.65886
ICGC_DO45123	3.30023	2.95848	2.64187	2.97427	2.74415	2.48953	2.56465	2.50342	3.2326	2.81783	3.11832	2.69516	4.42964	2.63799	5.68899	5.40641	3.52424	6.95512	2.42632	2.81858	3.79313	4.98286	2.86777	3.98864	3.96123	2.89174	3.60914	2.78229	3.71559	2.63473	2.45141	4.26505	3.43622	4.57206
ICGC_DO45127	3.77411	3.86714	2.72654	3.42402	3.61524	3.51548	2.98081	3.54267	2.64018	2.65549	4.52659	3.09322	5.65697	2.54016	5.44998	4.81013	4.25783	4.88203	3.61612	2.77765	3.85258	4.86932	3.3271	5.42439	3.89949	2.74087	4.31385	2.34661	5.51415	2.72481	2.45141	3.30945	4.53071	6.40677
ICGC_DO45131	4.50168	2.5209	3.29861	2.71178	2.80462	2.69687	2.68337	2.73894	3.61183	2.55976	4.22034	2.59616	6.42815	2.60432	7.67402	3.70306	3.53779	5.47931	2.48193	2.57413	2.50961	6.00326	4.53293	3.78507	4.73732	2.7306	3.63192	2.75221	6.53745	2.49202	2.45141	3.3829	2.71816	5.71999
ICGC_DO45135	4.80298	4.12202	2.85345	3.88381	3.21234	3.43992	3.20758	3.2513	3.26995	2.67869	5.09883	2.94275	6.327	2.7588	7.27099	3.86362	4.13445	5.03974	2.50019	2.86631	4.41499	5.93992	3.54828	5.98355	3.90637	3.85502	3.30732	2.70374	5.75106	2.93715	2.45141	2.82513	5.53315	6.18124
ICGC_DO45137	3.75868	2.44564	2.55819	2.77002	2.69271	2.61631	2.70692	2.68683	3.45613	2.55976	3.1672	2.61855	5.07062	2.52191	5.55977	6.28686	3.45582	6.24243	2.51933	2.42869	3.96969	5.83507	2.80982	3.82629	3.03688	2.81499	4.03895	2.57976	4.10336	2.96795	2.45141	3.9788	3.87809	5.42024
ICGC_DO45139	3.30569	2.81573	2.62634	2.99979	2.71748	2.96654	2.80004	2.73248	3.63642	2.74355	3.6487	2.77444	5.36254	2.66877	6.51993	5.41445	4.22223	7.30136	2.42632	2.8292	3.90459	4.60032	3.45091	4.4108	3.20029	2.88987	3.64751	2.67346	4.22448	2.82531	2.45141	3.08404	4.2184	5.3582
ICGC_DO45143	3.28835	3.17574	2.61232	3.14041	2.83637	2.57465	2.88742	2.71747	3.24673	2.77029	3.66607	2.44038	5.55588	2.75048	6.93843	5.08758	4.26334	3.12474	2.65365	2.79704	3.57191	5.08762	2.84991	4.76512	4.06315	2.52585	3.88768	2.76961	5.77536	2.32906	2.45141	3.80664	4.59112	5.29224
ICGC_DO45145	3.15008	4.32324	3.62527	3.71749	3.30568	3.09291	4.28242	5.22566	3.5175	2.81838	4.52659	3.88463	5.79294	2.78411	6.0316	5.15872	4.41521	5.32006	2.96246	4.06304	4.73341	5.24445	3.11193	5.28592	4.30104	3.14353	3.13549	3.31744	5.60424	2.44751	2.78536	4.56765	2.85781	4.7258
ICGC_DO45155	2.95733	2.39847	2.61601	2.63784	2.96373	2.71093	3.80264	3.11949	3.24179	2.57687	4.64024	2.38379	6.51188	2.65864	5.8883	6.3368	3.33305	6.98812	2.47281	2.44552	2.3777	5.35715	3.40656	3.70611	3.96491	2.48902	3.09519	2.38906	6.7746	2.45114	2.56328	4.46078	3.48477	7.31223
ICGC_DO45157	3.96415	3.57377	3.19312	3.65108	3.04029	3.04256	2.79587	2.619	3.28889	2.59221	4.14844	2.88543	6.29284	2.881	6.19565	4.99497	4.2748	5.82306	2.49297	2.64375	4.38731	4.90094	3.88655	5.53432	4.50007	3.87724	3.64213	2.47857	6.3548	2.7798	2.51288	3.16905	4.37866	6.27876
ICGC_DO45161	3.78522	2.91848	2.71338	2.97207	3.36126	2.71853	2.89021	2.65749	3.44281	2.61643	3.95052	2.96183	5.55364	2.69189	6.37529	5.12066	3.77929	6.61158	2.52894	2.87557	3.29792	4.80701	3.5757	4.93743	3.59108	3.70567	3.48243	2.50861	4.76508	2.58729	2.45141	3.02504	3.13413	5.2755
ICGC_DO45165	3.85466	2.98769	2.73529	2.97899	3.0875	2.67183	2.69395	3.29726	3.38326	2.55976	4.24835	2.49559	5.93893	2.6613	6.78328	4.02579	3.77587	6.38443	2.49083	2.59792	3.42095	5.37482	2.85732	4.80945	3.3865	2.99279	3.23834	2.35069	5.88463	3.00293	2.45141	3.49142	4.39019	6.0587
ICGC_DO45169	3.45831	2.88067	2.59705	2.92182	2.62428	2.19381	2.93059	2.64785	2.66454	2.79849	3.14452	3.01022	4.56862	2.56349	6.47393	4.69966	3.4088	4.64178	2.42632	2.78912	3.77206	3.2958	2.72281	3.33144	3.21919	3.23978	3.30676	2.74222	6.65686	2.50844	2.45141	4.01818	3.38317	5.43347
ICGC_DO45171	3.03692	3.12255	3.65723	2.88942	2.74606	2.81982	2.76484	2.58294	2.93579	2.72619	3.33895	3.36893	4.92415	2.60641	5.90716	4.26978	3.31663	2.90893	2.46522	2.43903	3.93788	4.03166	3.12975	3.28685	3.49809	2.44416	3.21524	2.42763	4.03136	3.15031	2.8602	4.80459	2.64131	5.18741
ICGC_DO45173	3.92777	2.67507	2.56643	2.83516	2.8791	2.45207	2.69613	2.54914	3.15471	2.5781	3.39227	2.51321	4.8929	2.51587	6.60578	6.64494	3.3107	4.01988	2.47974	2.62975	2.77689	4.44353	3.01256	3.86828	3.18473	2.66176	3.77865	2.59746	3.65121	2.38834	2.45141	4.02998	2.94585	4.89165
ICGC_DO45177	3.53833	2.49074	2.47823	2.76187	2.71506	2.94645	2.67738	2.61715	3.24364	2.60846	4.14565	2.47418	5.9063	2.65924	6.67163	6.12702	3.38023	4.89515	2.44487	2.75985	3.34604	5.0382	3.38597	5.01853	3.41859	3.25284	3.01045	2.55158	6.01913	2.6112	2.45141	3.32158	3.73851	6.25646
ICGC_DO45187	3.78456	2.63886	2.53124	2.86577	2.70814	2.20079	2.76244	2.59935	3.48703	2.55976	3.16582	2.88244	4.68952	2.55945	6.40594	4.3814	3.37731	4.07188	2.45592	2.48624	2.48203	3.92007	2.81293	4.48755	3.28444	2.947	4.12907	2.64011	3.67652	2.61975	2.5406	4.35352	3.42347	6.07771
ICGC_DO45189	3.31233	2.2754	2.42153	2.5549	2.61455	2.32776	2.56465	2.54878	2.8607	2.58171	2.88449	2.94453	4.55864	2.57324	7.13405	4.53129	3.60905	5.25707	2.44122	2.4751	3.46599	3.48969	2.64976	2.91998	3.74446	2.38541	3.69973	2.73723	3.16274	2.35346	2.45141	5.56318	3.22735	6.6584
ICGC_DO45191	3.9152	2.47087	2.46049	2.63367	2.6576	2.11753	2.56465	2.62561	3.35994	2.55976	2.86595	2.6819	4.44582	2.51553	6.1048	5.26744	3.44776	6.1602	2.47536	2.39211	2.76207	3.77152	2.48589	2.963	3.10553	2.67122	4.11276	2.52745	3.09868	2.32906	2.45141	3.76728	2.84736	5.05456
ICGC_DO45193	3.75303	2.69683	2.71986	2.85474	2.93123	2.25931	2.7029	2.59248	3.12948	2.72471	3.54563	2.51189	4.39962	2.60684	5.61044	4.58929	3.92136	5.31725	2.67281	2.54884	3.58572	4.08731	2.7948	3.82292	4.40464	2.59602	3.86266	2.73095	3.31294	2.50194	2.45141	6.51268	3.33542	4.04319
ICGC_DO45197	4.81587	2.4485	2.52157	2.65114	2.72961	2.57175	2.56465	2.78249	3.79996	2.58375	3.81797	2.54529	5.11137	3.6155	7.00868	5.45249	3.75987	3.80801	3.4144	2.44462	2.67175	3.9848	3.63285	4.03239	3.27575	2.6218	3.94166	2.41662	5.0516	3.15481	2.45364	3.1577	3.66839	6.17738
ICGC_DO45203	4.35753	3.36535	3.12436	3.33342	3.11656	3.30276	2.97792	2.70626	3.22339	2.55976	3.85323	3.58603	5.0768	2.64823	6.33374	5.20811	4.42896	5.0785	2.46443	2.76445	4.01084	5.25259	3.3697	5.36459	3.96268	3.35913	4.32838	2.99893	4.76508	2.77436	2.45141	6.47439	4.58478	6.01869
ICGC_DO45205	4.77133	2.48987	2.58678	2.60671	2.73463	2.41007	2.64702	2.93581	2.62408	2.58517	3.45245	2.37767	4.74059	2.64128	7.28073	4.33141	3.62187	5.95739	2.44978	2.4333	2.88465	5.64964	2.67618	3.30846	3.23596	2.51097	2.90397	2.57054	4.33817	2.772	2.45141	7.09645	3.49764	7.05449
ICGC_DO45211	2.74534	3.75717	3.13413	3.2887	3.14303	3.31357	3.1033	5.49675	3.10158	2.65316	4.12764	3.17145	5.45995	2.92575	5.64046	5.88806	4.36456	6.29858	2.62696	2.54954	4.08385	5.87091	2.90424	4.69037	5.80047	2.67219	2.55364	2.26492	7.5716	3.33949	2.54108	3.10339	3.30712	4.06154
ICGC_DO45213	3.5894	2.62129	2.52854	2.80104	2.62684	2.44346	2.601	2.93742	3.2131	2.58471	3.13113	2.40845	4.42529	2.58344	6.40196	5.96297	3.21277	3.39552	2.44476	2.55899	2.69646	4.57826	2.82411	4.29441	3.69573	2.89438	3.48097	2.46191	3.79071	2.38737	2.45141	4.02676	3.97482	5.96321
ICGC_DO45219	2.93198	2.66549	2.75273	2.72404	2.66268	2.3089	2.90356	2.59511	3.57966	2.68296	2.92718	2.6561	4.68579	2.50456	6.6638	4.16134	3.80107	6.24868	2.60458	2.42359	3.21332	5.03111	2.96308	3.74507	3.87744	2.91893	4.26731	2.51567	3.6944	2.81752	2.45141	3.55181	3.64758	5.34903
ICGC_DO45221	3.79214	3.43399	2.77807	3.21884	3.23943	2.9875	3.04909	2.66993	3.03775	2.66112	4.24178	2.8771	5.67945	2.72025	6.00272	5.08903	4.54885	6.42448	2.46697	2.86231	3.36557	5.30657	3.49984	4.80097	3.11788	3.08518	3.40629	2.57862	4.67838	2.73845	2.45141	3.41788	3.6959	5.49756
ICGC_DO45223	3.51392	3.35969	2.75502	3.11623	2.92884	2.89439	2.9696	2.53341	3.27529	2.72077	4.48799	2.65649	5.88789	2.60999	5.86409	5.03609	3.71905	3.50083	2.45322	2.74315	4.07642	5.17091	3.49722	5.22816	3.79977	2.97904	3.23926	2.4215	5.04946	3.00109	2.60252	4.00979	4.76527	5.95645
ICGC_DO45225	3.49808	4.04886	3.27817	4.03503	3.46953	3.67919	3.04303	2.97836	3.62195	2.56728	4.70866	3.26568	6.05522	2.78572	5.72648	4.00305	4.39702	4.76762	2.51245	2.70725	4.35411	5.15203	3.85102	5.40088	4.16503	2.84603	3.6171	2.4875	5.63817	3.29933	2.46742	4.47804	4.0909	5.9899
ICGC_DO45227	3.39011	2.39733	2.51511	2.6238	2.80568	2.55764	2.56465	2.64441	3.6087	2.55976	3.19513	2.47345	4.84269	4.71263	6.63536	5.68963	3.35265	5.78394	2.5841	2.39613	3.00572	3.88396	3.54519	3.10406	3.36408	2.5483	3.63626	2.61256	4.17117	2.32906	2.45141	3.12019	3.77853	5.52618
ICGC_DO45231	3.00344	2.80525	2.7851	2.95192	2.84365	2.76543	2.72449	2.60088	3.02169	2.55976	4.03549	2.86719	5.50619	2.75316	6.05687	5.52133	3.12979	6.87526	2.47108	2.87194	3.62339	4.9947	3.47092	4.91978	3.12118	2.63811	2.87513	2.39698	5.65799	2.58572	2.47221	4.57029	3.41517	6.6584
ICGC_DO45235	5.17106	2.8748	2.55692	3.04091	2.88449	3.20827	2.95101	2.57487	3.25356	2.55976	3.93055	2.47112	5.41835	2.66019	7.16497	3.19285	3.48843	7.96023	2.42632	2.79147	3.57769	5.03561	2.98248	4.30211	3.33184	3.57327	3.02983	2.85401	4.19073	2.59904	2.45141	3.16707	3.34284	5.55825
ICGC_DO45237	3.74386	3.68311	4.55895	3.87282	3.03648	3.83883	3.08139	3.2072	3.77391	2.65422	3.69234	4.91567	4.79369	2.65207	6.36217	5.05445	3.23192	8.21706	2.4802	3.40083	4.59763	3.7076	3.14954	4.67337	4.40966	2.53747	3.80544	2.91701	3.59057	2.74077	2.52081	3.13737	3.25093	4.20933
ICGC_DO45239	3.09057	3.36646	3.1776	3.3976	2.80393	3.02992	3.24612	2.85966	3.13686	2.55976	3.50148	4.90747	5.15906	2.69829	6.27203	5.30588	3.86043	6.26248	2.89708	2.80794	4.34667	4.03366	3.41192	4.32931	3.16012	3.29176	3.81146	2.96623	3.82253	2.38034	2.45141	4.95882	3.11443	6.2129
ICGC_DO45245	5.89297	2.19346	2.46186	2.56363	2.51052	2.12316	2.56465	3.19167	2.512	2.55976	2.6686	2.28321	4.2374	2.49369	7.80807	5.39169	3.16974	7.42366	4.11822	2.30022	3.77562	5.56639	2.50336	2.71512	3.32308	2.4418	2.81088	2.30897	7.45877	2.405	2.45141	3.00653	2.95164	5.28615
ICGC_DO45247	3.51258	2.64512	2.60597	3.12378	2.81348	2.56266	2.78725	2.87651	3.47346	2.55976	3.25689	3.60602	4.19095	2.53519	8.26116	5.70762	3.10193	5.4156	2.42632	2.71576	3.30548	3.36105	3.05202	4.65592	3.21166	3.0716	3.91454	2.84365	3.83173	2.42669	2.45141	4.15454	3.52742	6.02262
ICGC_DO45253	4.6573	2.56677	2.49954	2.75347	2.65555	2.46609	2.9274	2.9135	3.39163	2.55976	3.21813	2.64998	4.67207	2.52611	7.0036	6.33734	3.43294	7.57825	2.42632	2.66948	3.66858	3.92922	2.8309	4.2043	5.03003	2.62164	3.73973	2.95287	3.74568	2.59513	2.45141	3.47088	3.77328	5.71379
ICGC_DO45263	7.62781	2.84103	2.67403	2.89542	2.97918	2.41211	2.68603	3.18781	2.70171	2.5683	3.575	2.43794	4.90636	2.63981	7.76567	6.00966	3.8124	6.65178	2.65584	2.54446	2.82005	5.47234	2.77761	4.10139	3.62958	2.58214	3.39907	2.29011	4.98399	3.29006	2.47221	2.97173	3.93207	6.03289
ICGC_DO45265	4.08252	3.62918	2.84931	3.31864	2.99079	2.69001	3.26476	2.76769	2.98329	2.603	3.961	3.10445	5.40908	2.77205	6.3068	3.92814	3.76102	6.30736	2.6307	3.05262	4.11432	4.97122	2.96535	5.04671	3.66717	3.20662	3.81659	2.90314	4.09405	2.39652	2.45141	4.402	3.21358	5.76807
ICGC_DO45267	3.57828	2.86734	2.54646	2.77869	2.8898	2.20864	2.64855	2.66024	3.33904	2.55976	3.46241	2.59019	5.01298	2.52047	6.27791	4.9387	3.65567	6.86774	2.53098	2.6986	3.75456	4.28657	3.54828	3.59392	3.54671	2.66547	3.46137	2.57576	4.80704	2.32906	2.50724	3.63927	3.45393	5.22344
ICGC_DO45269	2.5494	3.44928	3.12654	3.24713	2.89273	2.61515	2.89627	3.13706	3.28467	2.64672	3.42914	3.25558	4.87246	2.64158	4.83833	5.95396	3.96608	3.8003	2.62541	2.73381	3.87859	4.8418	2.93843	3.77731	2.8352	2.38453	3.31083	2.57076	4.4705	2.37661	2.45141	2.78425	3.06809	6.49358
ICGC_DO45275	3.64236	2.70467	3.51775	2.80708	2.84995	2.48284	2.90619	3.39703	3.09808	2.57944	4.47475	2.65751	6.30012	2.74237	6.53462	5.58111	3.3805	4.79745	2.55887	3.31343	3.16139	7.16083	2.72489	4.67337	2.8843	2.74043	2.60743	2.74649	4.9605	2.59172	2.45141	2.94268	2.86444	5.63552
ICGC_DO45277	4.19094	4.62921	5.57297	4.10328	4.9821	3.98226	3.56536	3.72722	3.40924	2.55976	5.41588	5.60077	7.44338	3.15748	6.84168	3.70385	6.03148	6.47883	2.79188	3.88394	5.69311	7.46576	3.33184	6.62455	3.89578	2.63147	3.87456	2.97566	7.29267	2.75004	2.61269	4.03242	3.4675	5.31485
ICGC_DO45279	3.3538	2.61911	2.58901	2.72851	2.84827	2.37031	2.74171	2.76865	4.03043	2.68772	3.37166	2.49241	5.04473	2.66728	6.30981	4.34011	3.63914	4.12234	2.7889	2.50325	3.59897	5.8244	2.81645	4.60009	4.74534	3.05755	2.62693	2.60042	5.54369	3.19019	2.46537	3.25303	3.59306	5.80249
ICGC_DO45283	3.56189	3.63068	2.53075	3.25826	2.88999	2.38559	2.9526	3.18781	3.03134	2.58128	3.74244	2.80088	5.08716	2.80012	6.58354	3.679	3.85008	5.83672	2.4665	2.67323	4.24223	6.8266	3.18921	5.32269	4.33597	3.00583	2.85215	2.6272	6.5903	2.67218	2.45141	2.74477	4.31379	6.6096
ICGC_DO45287	4.76811	5.48294	4.28821	4.40776	3.90784	4.38925	3.71702	3.26561	3.62233	2.80362	5.24338	5.29496	6.98632	3.60478	7.29882	5.8853	4.988	5.97181	3.16369	4.15746	6.99938	7.32542	4.00334	6.94416	5.47011	3.45726	3.51535	2.8771	8.09188	2.66812	2.69954	4.35529	4.81281	5.02113
ICGC_DO45299	3.03723	2.71529	2.77786	2.82852	2.78705	2.61769	2.93719	5.74836	4.53186	2.68365	3.6369	2.93954	4.82676	2.62643	6.41831	6.63549	3.55843	6.06163	2.58397	2.52293	2.62802	4.07717	2.46603	3.64216	2.93901	2.54065	2.63166	2.3694	4.14302	2.32906	2.45141	2.77265	3.22763	4.51865
ICGC_DO45301	5.0364	3.24563	2.85762	2.98278	2.77556	2.3608	3.15054	4.33346	3.49906	2.61493	3.67553	2.93473	5.39991	2.63722	7.12724	5.01396	3.55392	8.27908	2.95636	2.74207	4.56262	6.29118	2.58131	3.50413	4.73393	2.41775	3.0744	2.45067	5.67808	2.43944	2.45141	3.61619	3.41976	4.44322
ICGC_DO45303	4.97562	2.58856	2.84931	2.65807	3.32113	2.66297	2.93365	2.69007	3.73724	2.62292	4.47041	2.40334	5.81216	2.66929	6.9478	4.69164	3.43185	6.67679	2.45348	2.43205	4.15685	5.76623	2.96893	4.7319	2.87129	2.99133	3.28137	2.41053	4.83649	2.78871	2.45141	3.32704	3.39261	6.02952
ICGC_DO45305	4.02012	2.78231	2.85456	2.77258	2.89745	2.31162	2.8856	3.65009	3.06358	2.58869	3.47515	2.59478	4.86393	2.62759	6.5743	4.40629	3.7212	5.67307	2.66993	2.55393	4.30179	6.33746	2.69292	4.1091	3.96123	2.62512	2.60352	2.52178	6.87857	2.4556	2.45141	3.04424	3.2859	6.84731
ICGC_DO48672	5.46591	2.54712	5.34721	2.79536	3.04819	3.00262	2.56469	2.99194	3.87511	2.80689	4.11421	2.40437	5.35247	2.78938	6.0457	6.38977	4.32194	6.11682	2.42634	2.79995	3.47858	4.38328	3.59586	4.49558	3.26642	2.96268	3.49698	2.5061	4.47357	2.41683	2.45144	2.39991	3.86314	6.18736
ICGC_DO48679	3.60539	3.01001	2.72589	2.96217	3.0209	3.00645	2.97675	3.96989	3.89047	2.55976	4.23117	2.97595	6.14445	2.67862	6.86149	3.61558	4.20736	5.29163	2.4704	2.85922	3.96266	5.46825	2.9904	5.04577	3.69072	2.78814	3.12437	2.80459	4.48275	2.75259	2.45141	3.18251	3.38081	5.2307
ICGC_DO48681	2.65909	2.48787	2.46777	2.72102	2.53986	2.12383	2.60198	2.56995	3.464	2.55976	2.76831	2.31453	4.03238	2.54325	5.12296	5.67976	3.44833	4.7367	3.03727	2.6202	3.05084	3.43947	2.71922	3.30761	2.57393	2.38749	4.78908	2.26949	3.45139	2.32906	2.45141	2.87335	3.50689	7.03612
ICGC_DO48682	2.78435	2.66611	2.70578	2.82822	2.66222	2.25319	3.07369	2.67155	2.85893	2.55976	2.80997	2.49852	4.19491	2.53733	5.60484	4.41828	3.71434	4.68245	2.42632	2.42614	3.40134	6.60426	2.89966	2.91272	3.0821	2.39795	3.57788	3.04202	3.1221	2.70086	2.45141	4.50271	3.55307	4.867
ICGC_DO48700	4.09757	2.94757	2.62534	2.97591	2.88746	3.21249	2.83442	2.60531	3.68736	2.55976	4.39879	2.76756	6.33302	2.87771	7.21548	5.21775	4.76965	6.70293	2.62208	3.00426	3.91794	5.74954	2.92827	5.07709	4.53889	2.99695	3.52071	2.81924	5.6064	2.72765	2.45141	3.65083	4.88419	6.10813
ICGC_DO48712	5.03548	2.79284	2.54994	2.86592	2.77574	2.55661	2.93534	2.75043	4.254	2.55976	3.73065	5.00831	5.69203	2.64542	7.02832	4.65349	3.69325	6.59564	2.4549	2.55969	3.82826	4.91182	2.9377	4.74189	4.58337	3.67499	4.10789	2.31174	4.50998	2.51011	2.45141	3.38698	4.10517	5.66174
ICGC_DO48717	3.83734	2.70109	2.67074	2.62608	2.59405	2.43779	2.87096	3.29904	3.03474	2.76104	3.02954	2.9478	5.32722	2.58658	6.58785	5.53482	4.29636	5.60963	2.52125	3.00093	3.64907	5.32971	2.494	3.97343	3.94378	2.4103	3.94595	2.9702	4.02941	2.70246	2.67956	3.37716	3.97147	6.47843
ICGC_DO48719	3.29018	2.65605	3.41152	2.73503	2.65178	2.6446	2.85746	3.54698	3.86494	2.6276	3.15401	2.95169	4.84767	2.63839	7.12383	3.94108	3.46967	5.73737	2.4507	2.97534	3.79953	4.51097	2.5617	4.1786	3.2451	2.68291	3.96246	2.89536	3.58344	2.32906	2.45141	2.73633	3.55528	6.77486
ICGC_DO48720	2.69108	4.2892	3.07682	4.32383	3.56184	3.31251	3.10699	3.44346	3.50584	2.71626	5.24881	2.94866	7.0536	2.81436	5.54807	4.67675	4.46805	5.3154	2.50788	3.02608	3.66198	6.38161	3.78207	6.40312	4.59032	3.74045	3.29395	2.54614	6.37329	4.0157	2.49258	3.37159	4.9978	6.91129
ICGC_DO48723	4.00569	2.98866	2.64111	2.82931	2.82982	2.93205	2.81762	2.98616	3.45102	2.55976	3.63424	2.53173	4.97115	2.77758	6.4614	4.35359	3.92958	7.43612	2.72459	2.63111	3.50408	3.93874	3.29905	3.54368	3.31168	2.65068	3.44047	2.98621	5.69695	2.42711	2.45141	2.58405	2.88702	5.21941
ICGC_DO48727	2.61102	2.30423	2.47048	2.57907	2.74065	2.42341	2.74683	2.50342	3.89663	2.55976	2.94539	2.45796	4.6354	2.60498	4.77413	4.59112	3.21482	3.47255	2.42632	2.40596	3.12365	3.49214	3.11803	3.22222	3.03742	2.38187	4.15033	2.31554	3.23482	2.50385	2.45141	3.61667	3.05105	4.59116
ICGC_DO48728	2.93731	3.80625	3.62567	3.93445	3.35408	3.49585	3.99923	2.91898	3.33208	2.69187	4.94852	5.05797	6.43339	2.94253	6.47131	3.871	4.54815	4.04326	2.46991	3.63823	6.78051	6.00243	3.58938	6.59669	4.00145	3.96283	3.86552	3.26578	6.04047	3.13015	2.5481	3.42331	5.4236	6.2702
ICGC_DO48730	5.42321	3.86835	2.9756	3.71402	3.22457	2.66297	3.22732	3.37132	3.32406	2.59753	4.33202	3.90175	5.78697	2.76173	6.64906	4.41738	4.66418	4.93128	2.46566	2.77289	3.99061	5.46721	3.7971	5.44537	4.29651	3.89395	3.96914	2.55367	4.85531	2.47574	2.45141	3.07879	3.67816	5.72342
ICGC_DO48732	3.47335	3.17244	2.70845	3.01165	2.83637	2.69227	2.90552	2.51735	3.7925	2.55976	4.42251	2.56051	6.26157	2.72153	5.556	4.38513	3.59828	5.86223	2.77987	2.7592	3.28691	4.78286	2.78068	4.83416	3.62025	3.1911	3.20587	3.22585	5.70303	2.47162	2.45141	2.76908	3.36734	5.33271
ICGC_DO48743	2.75799	3.00034	2.89183	3.20483	3.0017	2.80328	2.82595	2.65187	3.54028	2.55976	4.03417	3.56337	5.46806	2.64802	6.4836	5.39445	3.75068	4.53822	2.49483	2.53929	4.73341	5.26965	3.36073	4.75204	3.65981	3.20236	3.68237	2.59278	5.26959	2.51138	2.59226	3.25591	3.76629	5.63177
ICGC_DO48751	3.73235	2.57119	2.54859	2.66193	2.5838	2.11054	2.56474	2.90118	3.53968	2.8811	2.62816	2.46364	4.17842	2.47431	6.05377	4.61342	3.64253	7.26823	2.42638	2.58381	3.01154	2.74382	2.52379	2.78545	2.55063	2.52635	3.69474	2.80713	2.89199	2.5299	3.42671	3.49142	3.21819	4.94903
ICGC_DO48757	4.21604	2.54956	2.69175	2.70086	2.79944	2.35086	2.73986	2.5339	3.69483	2.6901	2.92302	2.44312	4.21841	2.51709	4.54855	4.72382	3.54862	5.85852	2.45799	2.57734	3.21411	3.83733	2.8171	2.92136	3.0075	2.58003	3.97147	2.54409	3.59407	2.45764	2.45141	3.21518	3.44325	5.80301
ICGC_DO50774	3.69341	2.89475	2.65378	2.90194	2.8994	3.10044	2.69195	3.05648	3.32961	2.64076	4.27693	2.99136	5.37704	2.59028	6.34475	4.26429	3.37604	6.13317	2.58043	2.79574	3.00572	5.02857	3.06047	4.62662	3.35729	3.2384	3.30213	2.35768	4.96744	2.58059	2.45141	2.86294	3.12633	5.67443
ICGC_DO50778	3.28154	3.9673	3.54328	4.54202	3.8456	4.27175	3.21519	3.66315	3.4892	2.55976	5.76582	4.08027	6.99213	2.9698	6.57083	5.4779	4.80213	4.8749	2.4732	3.12954	5.12111	6.03173	4.01629	6.12261	3.90244	3.31408	3.26035	2.4379	6.38575	3.3728	2.45141	3.88297	4.36257	6.4696
ICGC_DO50785	5.23422	3.25104	2.78393	3.40963	2.70088	2.30708	2.88809	4.49013	3.55995	2.55982	3.35726	3.80434	4.61084	2.70148	6.65352	4.81108	4.19236	3.18122	2.42636	2.62412	3.5287	4.24063	2.83031	4.20203	3.31245	2.87679	3.75662	3.40966	3.27525	2.484	2.45147	3.31336	2.78713	4.40092
ICGC_DO50793	3.99418	2.50672	2.60373	2.6681	2.60379	2.29235	2.56469	2.95421	3.17359	2.86902	2.66735	2.53282	4.28652	2.58955	6.85787	3.53607	3.70861	5.92426	2.52219	2.77573	3.20827	3.48441	2.71655	3.69645	3.50203	2.94474	3.90804	3.3074	6.34523	2.6411	2.45144	4.40105	3.07196	5.55322
ICGC_DO50799	3.37626	3.81504	3.75563	3.62139	3.12054	2.53321	3.33886	2.86625	3.23656	2.71315	3.7289	4.5667	5.02213	2.77114	6.23688	6.28186	4.6006	4.64525	3.36758	2.98329	5.24052	4.75666	3.10235	4.76657	4.41395	2.707	3.25851	2.65053	4.29987	2.36705	2.45141	3.75848	3.25438	4.70286
ICGC_DO50804	3.27925	2.52483	2.56749	2.64973	2.75635	2.39488	2.67114	2.50342	3.4834	2.85898	3.13392	2.39716	4.56862	2.58595	6.67251	4.08609	3.94907	5.40581	2.42632	2.63321	2.84865	3.5836	2.822	3.46199	2.9098	2.84371	3.43071	2.93829	3.50809	2.672	2.47633	2.68996	3.39117	4.59552
ICGC_DO50808	3.51724	2.57519	2.49417	2.85394	3.00346	2.48809	3.01478	2.97427	3.65496	2.65533	3.97767	2.64355	5.14904	2.51108	6.28549	3.38433	4.06966	4.65386	2.49065	2.53481	3.03886	4.50845	3.30769	4.63229	3.61225	2.95785	3.62054	2.68377	4.72335	2.65594	2.45141	3.38739	4.03523	5.04426
ICGC_DO50809	4.2918	2.84427	2.50032	2.8849	2.71184	2.30578	2.79132	2.78066	2.89084	2.62299	3.89795	2.65077	5.86747	2.6977	7.7017	5.9294	3.58845	7.39911	2.43289	2.69101	3.19766	4.98286	2.99808	4.02723	3.87361	2.65422	3.69532	2.46921	4.44174	2.3619	2.45141	3.6582	3.42375	4.86027
ICGC_DO50815	3.767	3.9784	2.72938	3.6539	3.21159	2.61688	3.64026	4.26435	3.15128	2.55976	3.64384	3.70114	5.25118	2.7239	6.92976	4.73133	5.27294	5.05341	2.58194	3.66343	3.45708	4.70896	3.20886	4.57227	4.66665	2.85163	3.41045	3.00783	4.23346	2.49091	3.34654	4.39171	3.81404	4.91055
ICGC_DO50822	3.09596	3.33255	3.2322	3.35128	3.20279	3.25232	3.34838	3.70045	3.19539	2.62218	4.1106	3.54476	5.38526	2.73507	7.95931	5.40625	4.33372	5.83398	2.58905	2.74002	4.09443	4.39933	3.65756	4.44712	3.56235	3.56623	3.33553	2.44218	6.72847	3.53779	2.45141	4.5018	3.40465	5.49357
ICGC_DO50825	3.04484	2.66991	2.84975	2.80147	2.70856	2.61142	2.7172	2.72131	3.3467	2.55976	3.14813	2.95493	4.71668	2.63301	7.19945	5.23709	3.16437	5.60622	2.42632	2.60896	2.83172	4.26134	3.04088	3.14708	3.49006	2.39553	3.50398	2.88616	4.83296	2.44114	2.4712	3.70954	2.94237	5.74218
ICGC_DO50829	4.06213	4.41869	3.1997	3.58241	3.31137	3.94327	3.68871	3.26796	3.59884	2.55976	4.92596	4.603	7.7091	2.7838	6.39331	4.59871	4.19594	2.90264	2.58619	3.34537	5.24195	7.22091	2.95024	5.47306	3.28689	2.9236	2.82077	3.12313	6.00979	2.3913	2.49369	3.3909	3.14075	5.7581
ICGC_DO50844	2.68472	2.40169	2.42994	2.57094	2.56864	2.28419	2.61206	3.04836	2.66923	2.66878	2.87093	2.37095	3.91582	2.55359	5.95593	5.33693	3.08858	5.68516	2.44263	2.34443	2.87246	2.76871	2.41539	2.46501	2.74879	2.36389	3.51507	2.62827	2.34953	2.32906	2.56957	5.02992	2.64816	6.16284
ICGC_DO50850	2.40822	3.332	2.95377	3.3899	3.39891	2.96135	3.24759	3.21142	3.95519	2.75125	4.03728	3.26226	5.34378	2.78523	6.02288	4.39686	4.53789	3.36956	2.42632	2.6823	3.95227	4.36531	3.37003	4.79639	3.49377	3.33483	3.69297	2.43246	5.00026	3.04892	2.49741	3.61864	4.47589	5.56881
ICGC_DO50859	3.55929	2.35924	2.52865	2.62475	2.56475	2.35012	2.86909	2.59319	3.53989	2.55976	2.69692	2.32193	4.23143	2.5872	6.48074	4.57705	3.48537	6.23263	2.42632	2.46352	2.78356	3.59407	2.9401	2.81663	3.4317	2.28438	4.07335	2.84852	2.85731	2.58466	2.45141	3.94161	3.27508	5.05899
TCGA_TCGA-2Y-A9GS	2.83875	3.26847	2.72384	3.33708	3.13605	3.11055	2.90702	2.68804	3.1636	2.59333	4.50112	2.54827	6.14889	2.74714	7.48189	5.12897	4.10726	6.51534	2.55089	2.86441	3.45911	5.38016	3.40372	5.01403	3.78799	3.25507	4.05884	2.76825	6.22256	2.41969	2.46476	3.26604	4.11344	5.79341
TCGA_TCGA-2Y-A9GX	4.71243	3.98345	3.14703	3.7997	3.27477	3.69067	3.34397	2.63898	3.06903	2.64909	5.04152	3.48279	6.41486	3.22065	7.33315	3.80899	3.9624	7.32163	2.46754	2.97919	4.67339	5.5476	4.11103	6.0731	4.63278	4.11536	3.08831	2.75264	5.87627	3.90433	2.46476	3.62989	4.51397	6.02888
TCGA_TCGA-2Y-A9GY	4.49957	4.97411	3.31012	4.22822	3.52671	3.81635	3.99512	3.8135	3.4244	2.61867	5.12723	4.69685	6.39853	3.16496	7.33474	4.64234	4.94069	4.58723	2.70635	3.68511	6.14454	5.88275	3.41793	6.29012	3.911	3.13092	3.44265	3.19349	5.30458	2.41204	2.56662	5.29105	3.18103	5.5919
TCGA_TCGA-2Y-A9H0	3.16939	3.64199	3.27018	3.61448	3.02755	2.93626	3.19956	3.22917	3.14912	2.81933	4.07746	4.22073	5.15331	2.71505	7.13972	5.06452	3.53996	5.79902	2.69791	3.03495	4.819	4.82049	3.74587	4.24927	4.03628	2.7518	3.20113	2.60795	3.9782	2.6651	2.46476	3.7319	2.55294	4.73812
TCGA_TCGA-2Y-A9H2	2.5416	3.29115	3.27129	3.1657	3.12704	2.9007	3.09054	3.69114	3.12317	2.59333	4.37348	3.49533	5.5262	2.74191	7.18025	4.38662	3.91808	3.2562	2.46754	3.02067	3.94222	7.16624	2.80252	4.65868	4.68819	2.79385	3.08965	3.46354	6.37244	2.54464	2.57447	3.49096	3.53869	6.14243
TCGA_TCGA-2Y-A9H5	3.18017	3.07123	2.72632	3.08805	2.69734	2.4327	2.87852	2.95246	4.01144	2.59333	3.4495	3.58232	5.07722	2.74982	6.79705	5.74907	4.0592	3.54944	2.51886	2.82896	4.02761	4.77733	3.19631	4.46154	4.06762	3.55941	4.41654	2.82635	4.405	2.95102	2.46476	3.70294	4.39397	5.68608
TCGA_TCGA-2Y-A9HA	4.46617	2.76597	4.00084	2.87178	2.8983	3.08923	2.72543	2.62057	3.03732	2.61397	3.38783	2.35004	4.72773	2.50051	6.51477	4.4605	4.72904	4.99334	2.99324	3.98462	3.15889	4.21641	3.24055	3.63899	4.01566	2.53315	3.76005	2.78138	6.9429	2.55166	2.46476	2.89968	3.62476	6.17602
TCGA_TCGA-5C-A9VG	3.21869	2.64229	2.55387	2.75959	2.78206	2.56218	2.74718	2.74872	3.72957	2.62241	3.586	2.66832	4.99515	2.66447	6.05935	5.13997	3.75811	2.89752	2.46754	2.62712	3.06399	4.62967	3.18349	3.99702	3.50351	2.69934	2.94387	2.9781	4.07188	2.55708	2.46476	5.32138	4.12963	5.51264
TCGA_TCGA-5C-A9VH	5.86765	2.87397	2.57527	2.69484	2.68215	2.39932	2.9281	2.98928	3.02213	2.59333	2.97102	3.26395	4.78519	2.65985	7.1466	4.21581	4.76309	7.4931	2.7511	2.56698	3.30429	5.21031	2.73737	4.1025	4.04021	3.25351	3.85212	2.65402	3.94964	2.78055	2.46476	3.66696	4.9803	5.79499
TCGA_TCGA-5R-AA1C	2.72503	2.95806	2.7646	2.6706	2.70628	3.01176	2.67072	2.53987	3.02292	2.59333	4.03957	2.99683	5.39613	2.56883	5.78185	3.97721	3.24684	2.89361	2.46754	2.74701	3.41801	4.40878	2.73202	4.2096	3.11761	2.55337	3.39622	2.65788	5.18552	2.6731	2.46476	3.78712	3.14215	6.02768
TCGA_TCGA-BC-4072	3.79967	4.87217	3.75559	4.66198	3.60758	3.51851	3.52384	3.75256	3.26483	2.64576	4.89011	4.17727	6.27693	3.23732	6.53392	6.00087	4.11488	5.44745	2.60132	3.05747	5.32392	5.69526	3.7545	5.56693	4.48893	3.21269	3.33061	2.72236	5.3282	2.79741	2.5361	4.42012	4.24515	6.1401
TCGA_TCGA-BC-4073	2.7206	4.6436	4.4293	4.53834	4.22893	4.46006	3.64265	4.46819	3.0311	2.71223	5.74224	4.3403	6.56365	3.24861	6.16693	4.55403	4.36985	4.85209	3.07111	3.66347	5.3609	6.24588	4.24906	6.01162	3.5863	3.2539	3.22422	2.62776	6.23263	4.34021	2.46476	4.43291	4.09851	6.63288
TCGA_TCGA-BC-A10Q	2.58601	2.73876	2.65889	2.79798	3.37372	2.50948	2.85763	3.42794	3.57286	2.66733	4.53204	2.57206	5.45884	2.62681	5.43616	5.59246	3.89847	5.38061	2.54279	2.60887	3.25685	5.68548	2.70392	4.19262	2.77398	2.79626	2.79713	2.63171	5.03258	2.55105	2.46476	3.44698	3.61584	6.54234
TCGA_TCGA-BC-A10R	3.39105	2.46046	2.50762	2.66157	2.72781	2.70607	2.71667	3.31618	3.00864	2.59333	3.35911	2.45533	4.85694	2.81067	5.69649	5.87805	3.92498	6.67679	2.48873	2.42033	2.71756	4.64449	2.78539	3.36612	5.12019	2.53085	3.62606	2.56812	3.85336	2.56421	2.46476	3.88736	3.92972	6.16145
TCGA_TCGA-BC-A10T	4.29816	2.45759	2.70597	2.71545	2.76093	2.98589	2.96693	2.53235	3.58032	2.65973	3.62852	2.42575	4.78257	2.54066	6.47323	5.01544	3.66773	3.52827	2.5086	2.73703	3.09886	3.98894	3.25125	4.1685	3.21677	2.79326	3.15817	2.6511	4.53545	2.76862	2.53291	3.81934	3.99789	5.71187
TCGA_TCGA-BC-A10U	3.72948	2.64257	3.14588	2.68679	2.73457	2.36611	3.06075	4.36384	2.99962	2.61394	3.61681	2.61472	5.1162	2.56749	6.63082	4.78204	2.93546	4.84034	3.64277	3.509	3.1065	5.20341	3.0627	3.26652	3.70358	2.60149	3.38904	2.66939	6.02636	2.43837	2.46476	3.86439	2.43232	5.0356
TCGA_TCGA-BC-A10W	3.05691	3.74882	2.99424	3.38103	3.43087	2.99626	2.79834	3.51233	3.26511	2.61828	4.56386	3.08379	6.05627	2.84808	5.69724	4.68963	4.64996	6.36374	2.71539	2.83282	3.6974	5.11735	3.07528	4.57187	3.0304	2.77725	3.20173	2.71771	5.75653	2.81536	2.56507	4.44989	4.24577	6.71603
TCGA_TCGA-BC-A10Z	3.46673	2.45501	2.46197	2.63386	2.66967	2.30637	2.67072	2.44427	3.43031	2.59333	2.78466	2.24184	4.10798	2.48691	6.45546	4.86175	2.76866	6.71549	2.50212	2.39906	2.73386	2.97429	3.27444	2.59277	2.82136	2.39242	4.36428	2.65005	6.66704	2.48383	2.46476	3.73298	3.94833	4.46559
TCGA_TCGA-BC-A112	3.73981	2.4924	3.17659	2.69	2.97845	2.57336	2.88203	2.64318	3.21547	2.73125	3.85457	2.47649	5.7121	2.60546	6.43067	3.61332	3.8262	7.62847	3.38355	2.55458	3.03245	7.53818	2.589	4.25921	3.23379	2.79459	3.28319	2.6191	4.61859	3.04013	2.58006	3.60718	4.4417	6.1863
TCGA_TCGA-BC-A3KG	3.5625	3.13476	2.68777	3.10903	2.77551	2.48489	2.91305	2.45222	2.99329	2.59333	3.14171	2.89914	6.33766	3.11682	6.59852	5.62959	4.13055	5.07013	2.68069	2.54235	3.67821	3.4478	3.18012	3.7258	3.15051	3.00703	4.54489	2.7498	4.1593	2.86383	2.46476	5.07417	5.60597	4.85622
TCGA_TCGA-BC-A8YO	4.3942	4.50714	3.73854	4.45558	3.63986	4.12373	3.49506	3.06733	3.19799	2.62094	4.97071	4.66524	6.33425	2.98402	6.19235	3.26223	4.11341	7.36351	3.79093	3.44344	5.2942	5.54124	3.57689	5.72657	3.41147	3.06389	3.8863	3.57316	5.07639	2.57055	2.46476	4.02615	3.67665	6.49628
TCGA_TCGA-CC-5258	3.09342	3.47377	3.18587	3.60323	3.06401	2.99964	2.84541	3.14309	4.24644	2.61667	4.14543	4.53254	5.34618	2.90068	6.81448	5.52434	4.3811	3.13059	2.48193	3.62384	3.84306	4.71521	3.31612	5.0919	3.57918	3.20245	3.7013	2.80845	4.80195	2.89643	2.46476	7.25753	3.92309	5.97222
TCGA_TCGA-CC-5260	4.12352	3.14258	2.81042	3.47783	3.60122	3.32136	3.27036	3.23387	5.32267	2.69113	4.99669	3.26711	6.4568	2.90874	6.13693	4.24769	4.1504	5.22836	3.94611	3.5247	4.18944	7.39712	3.1512	5.68084	3.36709	3.62721	2.96096	2.97119	8.17368	3.19319	2.46476	3.35994	4.83064	7.57775
TCGA_TCGA-CC-5261	2.93017	3.31086	3.21775	4.0651	3.2374	3.20277	3.58307	3.09949	3.6628	2.773	4.71128	3.85717	6.04317	3.20305	5.53063	5.43137	4.65943	4.0482	2.6315	3.11362	5.38405	6.23854	4.36679	6.69251	4.51528	4.516	3.42328	3.44476	5.89595	3.16183	2.46476	5.3546	5.22779	6.66642
TCGA_TCGA-CC-5262	5.77073	3.10634	2.84067	3.243	3.16175	2.96287	2.93543	2.82501	3.62386	2.59333	4.04542	2.79107	5.67489	2.90504	7.5951	5.5973	4.66402	3.33933	2.59733	3.18133	3.93369	5.75602	3.35743	5.36896	3.1375	3.32751	3.44385	2.65265	5.00861	3.11007	2.46476	3.23326	4.41723	5.31903
TCGA_TCGA-CC-5263	3.19907	3.11472	2.91641	3.31643	3.3232	2.82483	2.93304	2.79993	3.66434	2.59333	4.80135	2.99075	6.08966	2.7061	6.11112	4.54511	3.34385	3.05595	2.75092	2.85824	3.70223	5.6551	3.30638	4.8679	3.35307	2.75938	3.28256	2.70795	5.17433	3.07628	2.5751	3.86303	3.80195	6.46893
TCGA_TCGA-CC-5264	4.35845	3.68609	2.9626	3.55615	2.88452	2.58704	3.32075	3.08043	3.50418	2.59333	3.79424	3.01666	5.27222	2.69036	5.79825	5.56027	3.98199	6.31456	4.01076	2.61677	3.93952	4.43813	3.37545	4.28457	4.41249	2.68093	3.14668	2.72623	5.77155	2.87898	2.46476	5.21045	3.73782	6.15106
TCGA_TCGA-CC-A1HT	3.21542	5.24249	3.85929	4.82207	4.48185	4.44939	4.04709	3.85779	3.56288	3.0045	6.19048	4.58634	7.63691	3.66009	6.0131	4.8584	5.02814	6.88257	4.89593	4.09191	5.38596	7.05724	3.60969	6.87902	3.89379	3.333	3.17566	3.10329	6.1779	3.26915	2.81622	4.64576	4.58604	6.53827
TCGA_TCGA-CC-A3M9	2.79868	4.65918	4.84042	4.60927	4.32875	5.71107	7.19196	3.65776	3.77926	3.09321	6.53229	6.01962	8.64001	4.67842	7.03241	4.95641	4.95324	4.32198	2.48507	4.54487	7.4545	7.3342	3.98469	7.57542	4.46557	3.26664	3.04281	2.96744	8.29875	3.00375	2.46476	5.19478	5.0538	6.6666
TCGA_TCGA-CC-A3MA	2.75169	2.50061	2.56547	2.68312	2.91596	2.53553	2.77161	2.80205	3.15111	2.64472	3.60449	2.47492	5.27924	2.74109	6.25749	5.04189	4.06288	5.98318	2.5301	2.78497	3.4312	6.61722	2.56432	3.97295	4.38706	2.64432	2.99262	2.7971	4.22121	2.97415	2.46476	4.10317	4.75657	7.72596
TCGA_TCGA-CC-A3MB	4.93832	3.19606	2.74613	3.1246	2.91651	2.47648	2.74972	3.82049	4.0132	2.63329	3.42159	2.90684	4.94153	2.58611	6.60504	4.9649	3.41742	4.21357	2.46754	2.88203	3.75343	5.04521	2.7735	4.08728	3.1093	2.57913	4.42032	2.99424	3.57721	2.35496	2.6246	4.13759	3.5408	5.78973
TCGA_TCGA-CC-A3MC	3.22	2.85046	2.54702	2.89859	2.7225	2.73515	2.85424	3.24759	3.17535	2.59333	3.48856	2.62894	5.64116	2.77201	5.86707	6.14775	4.02214	6.67326	2.54135	2.68886	3.36789	5.97871	2.6908	3.78997	5.45285	2.70382	3.69568	2.57359	5.47763	2.54716	2.46476	3.67376	3.65922	5.61069
TCGA_TCGA-CC-A5UC	3.45184	3.27532	2.7524	3.38706	2.85082	2.47553	2.92721	2.71187	3.22976	2.6538	3.79988	2.9054	5.13794	2.68821	6.50729	5.45001	4.29196	5.83619	2.54102	2.95583	3.86983	5.0722	2.96586	4.66882	3.28375	2.4673	3.81512	2.79829	4.4649	2.7357	2.58742	5.88294	3.77131	5.42342
TCGA_TCGA-CC-A5UD	2.98966	2.74209	2.69346	3.07957	2.72455	2.33256	2.92338	4.12087	3.40521	2.76451	3.57626	2.89733	5.30187	2.54911	6.08099	5.13317	4.13206	6.09588	2.46754	2.63513	3.73914	5.40478	2.87732	3.71987	3.30437	2.57067	3.29415	2.79259	7.18407	2.75176	2.58539	4.47956	3.44202	7.67812
TCGA_TCGA-CC-A5UE	3.90394	2.95393	2.6138	2.92125	2.74038	2.43862	2.8501	3.82734	3.93427	2.6221	3.78838	2.84923	5.31823	2.56097	6.49763	5.37801	3.93861	6.53121	2.46754	2.70545	3.66607	5.30488	2.81079	4.08482	3.68821	3.0135	3.83087	2.86976	3.72723	2.52972	2.69133	3.87242	3.02221	5.20259
TCGA_TCGA-CC-A7IE	2.6598	4.57308	3.31805	3.77362	3.29933	2.69241	3.46715	4.51348	3.77747	2.69552	4.22717	4.31638	5.36985	3.15272	5.82208	6.95014	5.17347	4.24945	2.48374	3.35846	4.89294	4.95311	3.19699	5.37208	4.69631	3.0644	3.59195	2.67806	4.47635	2.85282	2.57033	5.65737	3.88734	4.68724
TCGA_TCGA-CC-A7IJ	4.75041	4.19684	4.84786	4.2459	3.60043	6.96864	6.38374	5.06582	4.08888	2.62248	6.15198	4.65104	7.65	3.72381	7.1674	4.22602	4.53422	4.35332	2.52059	3.71298	5.90021	6.89798	3.84944	6.81209	4.67088	3.06436	3.10009	2.80146	8.76332	2.45172	2.58181	5.67502	4.03193	7.13015
TCGA_TCGA-CC-A7IK	3.19734	2.64505	2.68378	2.83512	2.77792	2.56823	2.73725	4.1896	3.29863	2.94979	3.18013	2.30949	4.33501	2.60209	6.95858	5.68449	3.19758	5.89276	2.46754	2.82481	2.87938	3.97771	2.65318	3.54856	4.01289	2.41755	3.66102	2.73763	4.18765	2.52976	2.46476	2.68527	3.27322	6.43785
TCGA_TCGA-CC-A8HS	4.30462	3.00228	2.60276	2.84882	2.70157	2.32951	2.85501	2.72922	3.82405	2.70818	3.16974	2.98217	4.45706	2.82519	6.86149	5.14634	4.58382	2.37844	2.46754	2.66547	3.34733	4.16121	2.72797	4.07479	4.88364	2.99733	4.61058	3.13289	3.63119	2.5086	2.46476	4.56583	4.09364	5.88716
TCGA_TCGA-CC-A8HT	3.34844	3.77603	2.99012	3.22603	3.06599	2.44362	3.30608	3.9949	3.2362	2.59333	4.269	2.90572	6.04054	2.86213	6.28204	4.4599	4.5152	6.85356	2.67299	3.08878	3.48128	6.15426	3.23446	4.67382	3.9099	2.74056	4.50257	3.46089	4.56297	2.4645	2.76794	4.04928	3.17539	4.99765
TCGA_TCGA-CC-A8HU	3.67885	2.49795	2.47976	2.61761	2.65769	2.44829	2.74882	3.29055	3.2327	2.70855	3.89236	2.52554	5.29261	2.63972	6.61572	5.55708	4.01532	6.12197	2.52161	2.8212	3.0465	4.17862	3.36465	3.25916	5.99501	2.49065	3.60979	2.6471	4.96056	2.78967	2.46476	5.22774	3.1302	5.95874
TCGA_TCGA-CC-A8HV	3.45346	3.10298	2.53001	2.8039	2.64804	2.31832	2.81883	2.95993	3.2634	2.61675	2.53784	2.48853	4.13153	2.50521	6.93431	5.28535	4.07985	5.15244	2.51028	2.45827	3.16548	4.67045	2.55165	3.09859	6.48646	2.61667	3.59401	2.71687	3.07135	2.47407	2.46476	5.17804	3.01268	4.74196
TCGA_TCGA-CC-A9FS	4.22053	2.74548	2.5981	2.90306	2.69563	2.59493	2.81118	2.80605	3.9981	2.63725	3.32753	2.56762	4.6956	2.60878	6.7053	5.73011	2.84794	4.1938	2.46754	2.87315	3.41158	3.94171	2.78245	3.7917	3.3423	2.71906	4.04149	2.73191	3.36967	3.16429	2.46476	3.45134	2.63029	5.04794
TCGA_TCGA-CC-A9FW	4.03791	3.67856	3.02056	3.22453	2.71469	2.39135	2.84181	2.66239	3.37222	2.59333	3.50319	3.13763	5.06388	2.72173	6.91625	4.16193	4.14856	5.21888	2.48161	3.5492	4.25406	4.15511	3.09197	4.34042	3.54195	2.83525	3.14789	2.72534	5.23854	2.94215	2.46476	3.47966	2.81977	5.93778
TCGA_TCGA-DD-A113	4.01479	3.21576	2.95144	3.30962	2.90883	2.85781	2.94787	3.12336	3.17529	2.61288	3.83517	3.07324	5.0891	2.80079	6.73754	4.30886	4.35116	5.31147	2.71528	2.66186	4.29636	5.25339	3.21028	4.32245	3.62348	2.58856	2.83836	2.77694	4.20536	2.6844	2.54352	4.32386	4.05413	6.16229
TCGA_TCGA-DD-A114	4.01147	4.4768	4.12624	4.72664	3.96283	4.1667	3.60288	3.07963	3.7294	3.2093	5.2566	4.81663	6.90142	3.60799	6.65734	5.16606	4.91837	2.63687	2.58811	3.64635	5.74707	7.54839	3.81238	6.24864	4.07665	3.92619	3.10198	3.03988	6.89856	3.5442	2.46476	4.83622	4.68502	6.41274
TCGA_TCGA-DD-A115	5.88356	2.50663	2.64188	2.74591	2.91494	2.92021	2.89928	3.0183	3.01157	2.65525	3.37356	2.78016	4.96795	2.8298	6.50857	6.05538	3.83466	5.37135	2.46754	2.81101	3.37921	4.20808	3.24894	4.29659	3.84398	3.32622	3.04595	2.86593	4.16911	2.48932	2.46476	2.99493	3.48002	5.35238
TCGA_TCGA-DD-A116	3.98427	2.88615	6.46754	2.86925	2.69427	2.44947	2.97508	3.49305	4.2974	2.7389	3.50127	2.65812	5.01572	2.54998	5.77535	4.84757	4.43292	5.76139	2.46754	2.79344	3.59221	4.61671	2.62477	4.25072	2.87926	2.54383	3.2397	2.53983	4.78683	2.44396	2.46476	2.89025	2.86145	5.23021
TCGA_TCGA-DD-A118	3.37095	2.49309	2.60226	2.74517	3.00296	2.49584	2.78242	2.55375	4.60259	2.6107	3.81253	2.56482	5.01093	2.57032	5.83056	4.00714	4.29484	3.62907	2.47825	2.69046	2.91578	4.16845	2.93091	4.04492	2.59432	2.60406	3.53885	2.64484	3.60924	2.63682	2.46476	3.48394	4.22811	5.58392
TCGA_TCGA-DD-A11A	4.33286	2.32295	2.586	2.65515	2.64591	2.54449	2.70031	2.47626	3.04136	2.70013	3.08607	2.28181	4.59139	2.53917	6.36726	5.02312	3.94042	4.4122	2.49453	2.55371	2.73773	3.37823	2.94435	3.29451	3.56739	2.36033	3.56223	2.74541	3.34084	2.54592	2.46476	4.11836	3.55219	5.33236
TCGA_TCGA-DD-A11C	3.34998	2.7024	2.64237	2.94967	2.78225	3.05281	3.02429	2.55115	3.05488	2.65096	3.85	2.54688	5.32833	2.7915	6.60578	4.2716	4.4839	5.13445	2.47954	2.7038	3.41439	4.58526	3.65847	4.31498	3.09895	3.08267	3.66604	2.88644	4.43672	2.52328	2.46476	3.65111	4.40491	5.78942
TCGA_TCGA-DD-A1EA	5.20855	3.65937	3.26042	3.40157	3.13737	3.16629	3.24576	2.62434	3.38702	2.76396	4.15183	3.46028	5.51451	2.77837	6.90118	3.24965	4.0685	8.98259	2.48601	3.1758	4.57095	4.52957	3.49681	4.38828	3.82981	2.86722	3.97857	3.31604	6.25921	2.87166	2.46476	3.82232	3.17247	6.06412
TCGA_TCGA-DD-A1EC	3.07147	4.549	4.04954	4.53945	3.98994	4.26387	3.97493	3.54321	3.57615	4.21244	5.12601	4.65566	6.86468	3.26355	6.64979	5.15962	4.60822	6.7467	2.46754	4.85879	5.61058	6.2342	3.9611	7.05007	3.46517	4.03963	2.92516	5.90922	7.46136	3.12744	2.46476	4.41993	3.89596	6.30086
TCGA_TCGA-DD-A1EE	2.9468	2.5855	2.54857	2.75751	2.82752	2.62979	2.72773	2.47456	3.70572	2.61486	3.56842	2.42263	5.04946	2.52582	5.66008	5.12273	3.99732	7.47209	2.66234	2.80019	2.92673	4.33426	3.49692	3.60813	3.58498	2.55984	3.43932	2.52206	7.17259	2.86203	2.46476	3.43857	3.88467	6.69512
TCGA_TCGA-DD-A1EF	5.09634	3.59497	3.17227	3.80278	3.17891	2.7363	3.21278	2.71328	3.17721	2.59333	4.02435	3.33712	5.49344	3.02362	7.11212	4.86257	4.65897	6.40569	2.49451	3.07255	4.87036	4.74909	3.70798	5.49954	4.0143	3.48041	4.41991	2.91237	4.83043	2.72144	2.63932	4.78772	3.98619	6.3818
TCGA_TCGA-DD-A1EG	3.31667	3.43382	3.1412	3.41682	3.26265	3.28518	3.21516	3.19137	3.02745	2.61303	4.28676	3.2159	6.11476	2.99749	6.11006	5.34919	4.40722	3.16034	2.51529	2.8642	4.6747	5.99984	3.10084	5.45097	3.52518	3.68511	3.44128	2.68658	6.52888	2.8769	2.46476	3.72401	4.33047	5.53988
TCGA_TCGA-DD-A1EH	3.02537	2.59594	2.64561	2.92199	2.77639	2.64825	2.75869	2.82884	3.78565	2.74353	3.59305	2.74535	5.11624	2.65529	6.97726	4.77759	4.22695	6.68616	2.4814	2.65112	3.79622	4.05161	3.18788	4.52566	3.6929	3.08863	4.46002	2.89444	4.37076	2.51015	2.46476	6.27478	4.25376	6.60596
TCGA_TCGA-DD-A1EI	2.94442	2.95049	2.98194	2.86528	2.96347	2.92722	2.89047	2.82195	4.6505	2.59333	3.95515	3.18723	5.62676	2.8082	6.59998	5.8924	4.05396	6.76691	2.4799	3.01726	3.73267	5.09633	3.24424	4.91391	3.64726	3.40466	3.7638	2.93447	4.93755	2.62972	2.6241	3.41527	4.63697	6.05053
TCGA_TCGA-DD-A1EJ	3.35284	2.76673	2.56963	2.84591	2.90942	2.60051	2.78171	2.5168	3.57797	2.59333	4.56972	3.02677	5.70967	2.66448	6.28521	4.72917	3.82562	4.41016	3.12576	2.6598	3.2587	4.71024	3.48601	4.22008	4.18606	2.58845	4.20798	2.51547	4.37676	2.54908	2.46476	6.16145	3.00752	5.94621
TCGA_TCGA-DD-A1EK	3.58666	2.48076	3.20915	2.68481	3.01611	2.7968	2.8376	3.6896	3.04507	2.69682	4.08032	2.40049	5.77225	2.91043	6.40324	5.46535	3.87806	4.68405	2.82908	3.09049	3.09915	4.51012	4.01133	3.41027	3.8035	2.56676	3.63582	2.69966	6.12159	2.44186	2.46476	3.44845	3.37348	5.46843
TCGA_TCGA-DD-A1EL	4.52969	2.915	5.14129	3.07797	3.11246	2.55646	2.71473	4.45394	3.27809	2.60987	3.98776	2.37027	5.43043	2.59122	7.11552	4.49868	3.49938	3.17143	2.48782	2.86068	3.1454	4.98555	2.91597	4.3414	3.19835	3.13676	3.45503	2.91556	5.76984	2.71326	2.46476	3.77809	3.38526	5.22605
TCGA_TCGA-DD-A39W	3.82922	2.67464	2.69043	2.93026	2.76529	2.86418	2.70567	2.6714	3.1432	2.74274	3.36268	2.51285	4.79303	2.59314	6.60842	5.06983	3.47722	4.19038	2.48361	2.8498	3.52715	3.87647	2.8038	4.24497	3.45887	2.56207	4.14133	2.78181	3.54586	2.58067	2.46476	3.08539	3.34477	6.28386
TCGA_TCGA-DD-A39Y	3.34503	2.91508	2.57284	2.81832	2.68615	2.35398	3.00684	4.00054	3.78034	2.59333	3.50959	2.77846	4.90736	2.54168	6.14532	4.73982	3.86683	6.33101	2.54923	2.55797	3.03097	4.74146	2.92936	3.4714	3.49243	2.55637	3.30217	2.57239	5.07962	2.54132	2.46476	3.48211	2.75838	4.8478
TCGA_TCGA-DD-A3A1	2.99945	2.7477	2.54373	2.99251	2.69013	2.57646	2.99751	3.26101	2.99584	2.69359	3.82309	2.61202	5.36032	2.60489	7.02201	4.14371	3.56023	4.84511	2.51449	2.56804	3.17148	5.35371	2.65763	4.06173	3.69807	2.82259	3.91223	2.74394	5.14168	2.5107	2.66823	2.81228	2.77103	5.12139
TCGA_TCGA-DD-A3A4	5.16715	2.32295	2.46197	2.61761	2.63106	2.44362	2.67072	2.39986	3.00417	2.61801	2.58746	2.24184	4.10649	2.47946	7.13466	6.40052	3.17229	3.51092	2.46754	2.46349	2.66709	3.12733	2.49938	2.64647	2.55978	2.34004	2.7821	2.51773	4.40341	2.45801	2.46476	3.39646	3.25171	5.70724
TCGA_TCGA-DD-A3A7	3.12385	2.69916	2.62835	2.76468	2.82842	2.22172	2.82343	3.98205	2.99915	2.59333	2.95194	2.81206	4.59844	2.5655	6.73114	4.21817	4.6674	7.98429	2.52243	2.4448	3.27344	5.81579	2.62982	3.20622	3.70613	2.4076	4.50986	2.44394	3.89584	2.42652	2.46476	3.19797	2.66934	4.27036
TCGA_TCGA-DD-A4NA	3.91443	3.62156	3.60401	3.16924	3.31243	3.51397	3.3133	3.82492	4.43507	3.15558	4.8001	2.94491	6.25795	2.96324	6.38411	4.69612	4.02211	3.98013	2.50122	2.70746	4.26629	5.65505	3.60951	4.38008	4.36954	2.79695	3.0087	2.65091	5.71314	2.80004	2.57535	3.8283	4.00474	6.7205
TCGA_TCGA-DD-A4NB	3.01269	3.17	2.76385	3.06138	2.86125	2.9082	2.88652	3.15724	3.05059	2.64333	3.91652	3.30073	5.66999	2.82099	6.05631	4.24229	3.80853	3.66631	2.46754	2.84902	4.06637	4.62515	3.16977	4.89065	3.9133	3.60982	2.7839	2.88337	5.80843	3.51436	2.56618	4.2557	5.15995	6.54742
TCGA_TCGA-DD-A4ND	3.27029	3.6689	3.31376	3.77228	3.4436	3.41418	3.24056	2.89364	3.60589	2.59333	4.63301	4.08854	5.99548	2.91312	6.21479	4.97582	3.80883	5.51907	3.19113	3.06413	4.82605	5.19558	3.62771	5.37035	4.22983	3.43058	3.79226	3.13393	5.44477	3.20803	2.46476	4.11049	4.17928	6.10585
TCGA_TCGA-DD-A4NE	5.34926	2.32295	2.47774	2.6624	2.74854	2.32467	2.70604	2.64982	3.1449	2.67088	3.07512	2.28949	7.44303	2.539	7.24265	4.24525	3.31377	6.19247	3.35255	2.55604	2.74268	5.00152	2.98873	2.96873	3.54172	2.54214	3.62206	2.6787	3.88964	2.49044	2.46476	3.28721	4.07938	5.51417
TCGA_TCGA-DD-A4NF	2.91831	2.40157	6.38533	2.61761	2.68952	2.72932	2.67072	2.51569	3.37748	2.59333	3.12139	2.37425	4.48567	2.55061	5.34971	3.02074	3.45364	4.45978	2.46754	2.51799	2.93665	3.68267	2.63792	3.23896	3.24533	2.36767	3.68943	2.61679	4.41027	2.73617	2.46476	3.46694	3.0727	7.01903
TCGA_TCGA-DD-A4NG	3.12986	3.08425	2.67596	3.04035	2.87298	2.7325	2.89663	2.42199	3.46498	2.59333	3.19944	2.58443	4.67986	2.5481	5.84793	3.39353	3.77981	4.73187	2.49037	2.48896	3.36348	3.5438	3.01116	4.08817	3.20866	3.37037	3.15307	2.72429	6.03746	2.46434	2.46476	2.8061	3.63657	5.87633
TCGA_TCGA-DD-A4NH	3.24142	3.3258	3.93055	2.94324	2.84497	2.84476	2.90248	4.43563	3.11379	2.59333	3.87551	3.1919	7.55975	2.94	6.14871	3.39119	4.1848	4.38575	2.51725	2.56266	3.39414	5.57044	2.96996	4.45025	4.75198	3.05792	3.54085	2.94871	5.22164	2.8153	3.06745	5.15089	3.94128	5.86055
TCGA_TCGA-DD-A4NJ	3.37503	3.73145	2.87881	3.47313	3.81755	3.13206	2.97041	3.23666	3.28003	2.59333	4.60816	2.59958	6.02238	2.9032	5.66817	5.19441	4.31682	4.06477	2.46754	2.70966	4.04427	4.96501	4.19135	5.03478	4.31836	3.27803	3.82871	2.79299	5.53675	2.6124	2.46476	3.49153	4.59799	6.141
TCGA_TCGA-DD-A4NO	3.80145	2.69932	2.52725	2.72068	2.7238	2.64356	2.76781	2.45807	3.29521	2.59333	3.31963	2.56987	4.99334	2.54854	6.04284	5.96625	3.77341	5.13384	2.46754	2.63631	3.1556	3.80269	2.74283	3.67274	3.74752	2.94418	3.45655	2.8318	4.23725	2.67172	2.46476	3.80905	4.25861	5.10413
TCGA_TCGA-DD-A4NQ	3.50978	3.02506	2.8117	2.8433	2.94038	3.662	2.90395	2.50934	3.11472	2.59333	3.99939	2.62691	5.43239	2.58804	5.9074	5.19083	3.16702	5.18206	2.54443	2.63268	3.07778	5.15904	3.16428	4.0104	3.43187	2.63655	3.14632	2.64079	7.15269	2.70475	2.59319	4.07252	3.04282	5.62675
TCGA_TCGA-DD-A4NR	5.39983	4.92323	3.72074	4.5459	3.75249	4.03655	3.93472	3.98577	3.19072	2.8296	5.25321	5.20958	7.18	3.37301	7.74154	5.13317	5.0333	7.14593	2.52919	4.03953	5.51274	6.54937	4.17154	6.39394	4.54376	3.84794	3.46291	3.22389	6.141	3.09195	2.46476	5.00787	4.19746	5.57115
TCGA_TCGA-DD-A4NS	3.72808	3.1573	2.95752	3.52017	3.06426	3.17257	3.22127	3.39543	4.1362	2.64664	4.66792	3.816	5.97172	3.09092	6.94468	4.4605	4.09063	5.40331	4.58277	3.56153	5.03719	5.84017	3.70044	5.92681	4.77592	3.65623	3.73784	3.59452	6.05337	2.92952	2.67708	3.4399	4.42488	6.52998
TCGA_TCGA-DD-A73C	3.33683	2.45826	2.65316	2.92341	2.82566	3.65952	2.84036	2.46303	3.24582	2.64698	3.55432	2.66052	5.07347	2.65185	6.36565	4.04536	3.4616	4.67398	2.46754	2.97243	3.27793	4.20693	3.02115	4.19494	3.53627	2.69706	3.21639	2.9611	4.24001	2.71694	2.46476	3.1479	4.03608	6.04164
TCGA_TCGA-DD-A73E	2.96726	2.3586	2.50221	2.67519	2.61184	2.26253	2.71616	2.58579	3.14583	2.6273	2.60527	2.30301	4.27424	2.52292	7.04957	3.32836	3.4209	4.77882	2.46754	2.50129	2.91039	3.32067	2.71104	3.10797	3.09625	2.3135	3.63679	2.74726	5.59696	2.50166	2.46476	3.52672	3.06695	6.22869
TCGA_TCGA-DD-A73F	3.83201	3.4862	3.28754	3.56583	3.18058	3.6697	3.21693	2.82187	3.39766	2.72695	4.55501	4.29256	5.90662	2.94178	7.11289	5.03711	4.03109	3.08228	2.67613	3.76364	4.87038	5.1582	3.54054	5.60698	3.82781	3.87192	3.43155	3.39529	4.94745	2.59526	2.46476	3.5116	3.59233	5.2953
TCGA_TCGA-DD-AA3A	3.27904	2.44638	2.84105	2.6526	2.845	2.29316	2.95991	2.92004	3.17786	2.63408	3.72473	4.47116	4.49069	2.65979	6.20381	5.09585	3.77712	4.55696	2.58777	2.74122	3.39421	6.41852	2.47887	4.02482	3.9272	2.47725	2.87631	3.20008	4.13307	2.49578	2.46476	3.95605	3.55621	7.10633
TCGA_TCGA-DD-AAC8	2.93929	2.71412	4.28808	2.78385	2.89932	2.67618	2.78492	4.08812	3.56352	2.62284	3.84177	2.46087	5.57417	2.53168	6.8927	4.76623	4.8966	3.58328	2.46754	2.78951	2.95921	4.77149	4.1575	3.79609	3.23946	2.59092	3.46083	2.9681	7.21716	2.82698	2.46476	3.50583	3.32368	6.51156
TCGA_TCGA-DD-AACA	3.37748	2.55865	3.83408	2.72897	2.80715	2.54006	2.73035	2.57306	3.92143	2.65987	3.30037	2.9233	4.70424	2.5883	6.64439	6.33975	3.19581	5.93764	2.46754	2.88061	3.4365	4.37069	2.75991	3.67328	3.07618	2.42895	3.94307	2.73712	5.33621	2.53062	2.46476	3.06179	3.43817	6.2764
TCGA_TCGA-DD-AACB	2.90441	3.7379	3.21227	3.45176	3.07529	3.67992	3.54049	3.45997	3.7121	2.67634	4.42632	4.36381	6.15614	2.85096	5.68017	5.34718	4.58636	8.47831	2.56798	3.84661	5.42736	5.21249	3.19709	5.59981	4.25598	3.14843	3.27534	3.50687	4.66244	2.4616	2.46476	3.12734	3.31168	5.98084
TCGA_TCGA-DD-AACH	3.3936	3.10247	2.65619	2.93885	3.2511	2.65097	3.09044	3.96872	3.13815	2.97056	4.20746	2.58969	5.78648	2.58311	6.86555	5.51759	3.94729	4.89569	2.5393	2.7814	2.93911	5.87433	3.60545	3.81042	3.32678	2.62217	3.58775	3.09596	3.84986	2.65998	2.46476	4.72779	4.01705	6.5025
TCGA_TCGA-DD-AACK	3.5086	3.06061	5.50141	3.02932	2.87322	2.373	2.87706	2.44227	3.16678	2.62919	3.47817	2.71288	4.92025	2.57734	5.30791	4.84674	3.94566	5.32227	2.48967	2.66844	3.53802	4.15408	2.94631	4.2351	3.5441	3.34145	3.53647	2.60545	6.80417	2.59352	2.46476	2.90142	4.13034	5.72045
TCGA_TCGA-DD-AACN	3.09289	3.5259	2.88337	3.36205	2.99792	2.80359	2.87998	2.90051	3.454	2.62735	3.98094	3.50956	5.22147	2.69518	5.29146	4.95107	3.57885	4.83044	2.46754	2.80993	4.45604	5.67234	3.43974	5.14996	3.58999	3.47111	3.98496	2.99975	4.5047	2.59104	2.46476	4.89689	4.07198	6.00553
TCGA_TCGA-DD-AACP	2.95555	3.61673	2.78925	2.98867	2.7078	2.36622	2.79312	2.74915	3.42614	2.6561	3.13992	2.89478	4.56729	2.71065	6.76389	4.49509	4.32653	5.97289	2.46754	3.82608	3.3663	4.08635	2.85293	4.13577	5.33363	2.81374	3.67704	2.72753	3.72382	2.39967	2.59209	4.01596	3.37582	4.80321
TCGA_TCGA-DD-AACS	3.15319	2.41145	2.5004	2.61761	2.70982	2.39306	2.67072	3.91564	3.44645	2.59333	2.97039	2.35532	4.3854	2.53809	7.92211	4.86163	3.2732	2.93937	2.46754	2.38938	2.86074	3.71059	2.94961	2.81545	4.27308	2.48591	4.32735	2.55595	3.12848	2.5802	2.46476	3.80429	2.72829	5.09206
TCGA_TCGA-DD-AACU	2.94437	2.72948	2.66992	2.87916	2.792	2.65052	2.99276	2.97198	3.8956	2.62422	3.92067	2.9382	5.37017	2.56777	5.85981	5.24194	3.49352	2.94007	2.85129	2.80604	3.73048	5.70751	3.28898	4.83007	3.72556	3.30605	3.58467	2.54182	5.94581	2.66998	2.58872	3.46735	3.56611	5.67694
TCGA_TCGA-DD-AACX	3.66215	2.53417	2.55955	2.67928	2.78936	2.27366	2.98235	4.02221	3.42993	2.59333	3.38832	2.82747	5.17231	2.50683	4.72774	3.91192	3.00869	3.3719	2.46754	2.52684	3.03932	3.8212	3.38932	3.31837	3.49906	2.43787	3.99049	2.67778	4.47407	2.40916	2.46476	3.23997	2.68989	4.97546
TCGA_TCGA-DD-AACZ	3.40569	4.56793	3.67484	4.16796	4.16332	4.05897	3.33162	3.16764	3.09125	2.74469	5.67987	3.95504	6.65892	3.10719	5.48694	4.60485	4.71233	3.21753	2.48383	4.00066	5.32378	5.91163	3.78311	6.65787	3.65964	3.05422	3.26462	3.67939	5.447	2.90497	2.67327	5.02904	3.52476	6.26308
TCGA_TCGA-DD-AAD0	2.68703	2.38024	2.51072	2.70961	2.71575	2.27506	2.77794	2.46427	4.16685	2.62096	2.94815	2.29179	4.61321	2.52752	6.36401	4.45056	3.18901	3.80488	2.48458	5.41542	2.9909	4.08653	2.80628	3.30242	3.35177	2.91702	4.10126	2.50781	6.03876	2.41891	2.46476	2.78006	2.38687	5.82617
TCGA_TCGA-DD-AAD1	3.70461	3.54436	2.86067	3.7598	3.1592	3.21359	3.39042	3.75128	3.3529	2.63	4.60495	5.82374	6.15594	2.93738	5.28678	4.80447	3.92294	6.38169	2.55529	3.07213	5.38796	5.46703	4.0457	6.50711	4.48905	4.32001	3.7061	3.09758	5.80394	2.51407	2.75129	3.77949	4.22812	6.19866
TCGA_TCGA-DD-AAD5	2.63734	2.55458	2.54597	2.69883	3.83152	2.60749	2.90586	5.15444	3.35302	2.64151	4.49679	2.5944	6.74692	2.75799	5.36801	5.36845	3.36275	4.88571	3.3385	2.6717	2.86848	7.64395	4.0285	3.35383	4.91357	2.50476	2.74034	2.53494	7.31142	2.58618	2.46476	3.1097	2.97336	7.28925
TCGA_TCGA-DD-AADB	3.35542	4.43115	3.75912	4.00394	3.23265	3.10522	3.82465	2.90885	3.55459	2.67149	4.33963	4.94702	5.848	3.24876	6.07661	3.4146	4.94629	4.5659	2.71665	3.35777	5.69518	5.57066	3.5989	6.07795	3.73481	3.66053	3.59145	3.29931	4.67784	2.49161	2.46476	4.30584	4.04393	6.23628
TCGA_TCGA-DD-AADC	3.09143	3.34379	2.77156	3.10965	3.13846	2.75542	3.04878	3.58172	3.49166	2.63519	3.74654	2.96635	5.16225	2.58075	5.84953	5.69478	4.07864	6.19934	2.5186	2.83373	3.85899	4.97759	3.4465	4.41869	3.54721	2.59028	4.15479	2.73262	4.20818	2.64296	2.46476	4.29201	3.74899	5.63476
TCGA_TCGA-DD-AADD	5.48304	3.07967	3.05944	3.10026	2.93114	2.76108	2.98055	3.06585	3.83237	2.59333	3.81198	3.51631	4.9062	2.5751	6.92046	4.14611	3.37945	3.05735	2.5081	2.93877	3.95785	4.25841	3.1338	3.95169	3.49552	2.62077	4.2977	2.82729	4.25297	2.58541	2.46476	3.78586	3.39203	5.73837
TCGA_TCGA-DD-AADG	2.89358	2.37411	2.56716	2.6799	2.63102	2.48828	2.70377	2.45742	3.80266	2.61796	2.65755	2.40877	4.1573	2.52088	6.22414	5.71822	3.01483	4.7418	2.48272	2.58977	2.87245	3.65256	2.60412	3.1395	3.17996	2.36575	3.83536	2.62787	3.15971	2.38512	2.5638	3.06725	3.18527	5.79531
TCGA_TCGA-DD-AADL	2.76577	2.39023	2.51922	2.61761	2.6288	2.35006	2.69997	2.45088	3.62074	2.61511	3.0378	2.39076	4.85609	2.50243	6.74022	4.87921	3.01395	4.08823	2.71922	2.83595	2.99511	4.83495	2.69314	3.24197	3.53215	2.48647	3.67184	2.65194	3.37386	2.37925	3.62104	3.82701	3.23982	4.72374
TCGA_TCGA-DD-AADP	3.14856	2.90938	2.65287	2.92591	2.72171	2.75654	2.97807	2.59124	3.77864	2.65126	3.50804	2.81382	4.94564	2.60803	5.72254	4.76503	3.95971	3.3628	2.48559	2.50179	3.45401	4.78869	3.20514	4.64671	3.78609	3.10875	3.68449	2.70537	4.16255	2.95178	2.46476	4.23761	3.79733	5.10988
TCGA_TCGA-DD-AADV	2.90452	2.518	2.59181	2.74893	2.77395	2.94488	2.7992	3.30263	3.43364	2.63332	3.81296	2.55571	5.12233	2.65641	6.55799	3.43215	3.65913	4.35195	2.59673	2.71378	3.19579	4.40948	3.30772	4.1851	3.73456	2.87532	3.6365	2.78654	5.67174	2.56415	2.54586	4.28859	3.51037	5.55766
TCGA_TCGA-DD-AADW	3.3451	2.75198	2.61863	3.06509	2.89144	2.38469	2.84729	2.64872	3.59619	2.59333	3.48375	2.69991	4.94653	2.62949	6.33066	6.19814	4.4641	4.12245	2.46754	2.52183	3.43598	4.99725	3.36512	4.14136	3.79287	3.08113	4.15146	3.19885	4.24986	2.51825	2.46476	6.64333	4.52932	6.42284
TCGA_TCGA-DD-AADY	3.23896	2.67361	2.61084	2.91224	2.64948	2.56889	2.67072	2.4568	4.00894	2.64163	3.04744	2.40708	4.47203	2.54674	7.96061	4.77594	4.16617	3.75062	2.46754	2.49494	2.99329	3.91453	2.90998	3.69748	4.67481	2.73509	3.49566	2.77644	3.30446	2.88538	2.46476	7.70014	4.10172	5.42342
TCGA_TCGA-DD-AAE9	2.64585	2.5965	3.03378	2.72139	2.61184	2.29684	2.72621	2.771	3.2088	2.59333	3.03714	2.41812	4.91412	2.55803	6.00743	4.92993	3.48282	2.79657	2.61302	2.60872	2.93903	3.90203	3.08966	3.10517	3.07625	2.8283	4.01341	2.67313	6.10025	2.37752	2.63099	3.38655	2.3971	5.66438
TCGA_TCGA-DD-AAEE	3.82512	2.61846	2.6886	2.89393	2.661	2.54507	2.80643	3.07235	3.46281	2.61467	2.98382	2.40471	4.49243	2.5253	6.96257	4.09751	3.6037	3.15687	2.48069	2.49293	3.28804	4.68574	2.6516	3.53874	3.38548	2.67589	3.31527	2.66264	3.44569	2.50176	2.46476	3.20298	3.38186	5.34155
TCGA_TCGA-DD-AAEK	3.73671	3.8045	3.1972	3.92325	3.26158	3.24984	2.96377	3.17887	3.86336	2.64283	4.47443	4.29469	5.90942	2.94387	6.05977	3.31382	3.86525	5.27307	2.46754	3.00812	5.05307	5.15448	3.91511	5.91495	4.05096	3.95353	4.03308	3.08027	5.44716	2.48278	2.46476	3.5801	4.08539	6.21175
TCGA_TCGA-DD-AAVP	3.23854	2.65216	3.15499	2.72947	2.61184	3.77047	2.84061	3.44909	3.13758	2.63826	3.27438	2.9256	4.49763	2.54116	6.34274	3.91238	3.94003	5.41107	2.46754	2.75098	3.23863	4.33228	2.67181	3.78112	3.73498	2.45105	3.64606	2.52726	4.80929	2.33367	2.46476	2.93691	3.2976	5.61453
TCGA_TCGA-DD-AAVS	3.02266	2.74242	2.57797	2.92555	2.77111	2.40595	2.70308	2.50949	3.72027	2.66445	3.60628	3.07421	5.29433	2.62083	6.10843	5.00307	3.70193	6.89112	2.49707	2.77224	3.80707	4.51901	3.01255	5.03444	3.64387	3.1485	3.53222	2.95258	4.31647	2.68095	2.46476	5.27355	3.4891	5.41509
TCGA_TCGA-DD-AAVV	3.59207	4.07945	3.11458	3.89887	3.14545	3.33776	3.2387	3.94255	3.18332	2.78749	4.41886	3.26676	5.9477	3.06087	6.144	3.79324	5.0088	3.26183	2.46754	3.02472	4.70433	5.96404	3.21498	5.81856	4.14412	3.58243	3.84878	3.09883	5.26941	2.97219	2.46476	3.31052	4.46949	5.66627
TCGA_TCGA-DD-AAVW	2.84119	3.5337	2.79073	3.27434	2.96228	3.15852	2.9887	3.79602	3.07635	2.65355	4.13458	2.88939	5.61214	2.82116	6.2066	4.04944	4.23571	5.84524	2.5229	2.75459	3.87911	4.95524	3.44561	5.39939	5.21127	4.07661	3.96735	2.79691	5.04573	3.13258	2.46476	5.78912	4.6575	5.93534
TCGA_TCGA-DD-AAVZ	3.33798	2.62928	2.5238	2.83171	2.72517	2.47198	2.9562	2.53566	3.56771	2.62356	3.42749	2.74957	4.77163	2.62755	6.48802	5.02388	2.90722	5.35488	2.46754	2.54518	2.99713	4.75427	2.85358	4.39778	4.87981	3.23206	3.51936	2.71398	3.75469	2.51191	2.46476	4.45668	3.77267	5.47512
TCGA_TCGA-DD-AAW0	3.31261	2.92116	2.89105	3.05659	3.05027	2.77195	2.99933	3.75793	4.47008	2.59333	4.35054	3.09591	5.8244	2.83992	6.10871	4.1976	3.54103	6.02685	2.48353	3.0961	4.10525	5.20528	3.26247	5.59425	4.94544	3.77271	4.02494	2.72842	5.12624	2.77777	2.46476	4.5468	3.48102	5.5224
TCGA_TCGA-DD-AAW2	3.34512	2.32295	2.53008	2.61761	2.67164	2.34047	2.77197	2.39986	3.143	2.63219	2.91855	2.34465	4.33799	2.48766	5.22445	4.6112	3.74777	4.07518	2.49152	2.76656	2.83214	3.6845	3.1107	3.56985	3.18341	2.47015	3.73699	2.54291	3.71623	2.48869	2.46476	3.26159	3.56996	5.81968
TCGA_TCGA-ED-A459	2.44768	2.66315	2.85537	2.74092	2.70643	2.67159	2.79895	2.4296	3.70956	2.59333	4.04735	2.67962	5.86858	2.74415	5.35412	5.47425	4.35858	3.42613	2.78816	2.49875	2.79352	5.90598	3.24336	3.60101	4.16006	2.59521	3.12482	2.61327	7.9143	2.8823	2.66296	3.46112	3.0865	5.63771
TCGA_TCGA-ED-A5KG	3.83259	5.29078	4.33856	5.94748	4.56212	4.98148	4.63532	3.6582	3.88558	2.69843	6.07236	5.68396	7.36224	3.74015	5.65762	5.20314	6.04743	3.77488	2.61389	4.45612	7.38911	7.22823	5.84439	9.34467	6.09383	5.82392	3.9441	4.71525	7.40888	2.99449	2.46476	5.53191	5.9218	6.39307
TCGA_TCGA-ED-A66X	2.97108	3.04189	2.72513	3.08142	2.99038	2.95278	2.79693	2.78562	4.4232	2.61799	4.72638	3.40558	6.693	2.86396	5.80687	3.31079	3.95822	5.44583	2.46754	2.79223	4.06481	5.69785	3.44134	5.37952	3.90547	3.10439	4.18819	2.90428	5.19039	3.04693	2.46476	3.53609	4.45592	5.89032
TCGA_TCGA-ED-A66Y	6.11108	2.5003	2.54053	2.6688	2.70312	2.31188	2.67072	2.46999	3.03231	2.59333	2.85111	6.43184	4.30593	2.53308	6.89124	5.39237	4.52269	6.34619	2.46754	2.48589	3.27286	3.63137	2.56242	3.25633	3.16318	2.43686	4.40622	3.07922	3.13186	2.45557	2.46476	3.97546	3.71606	6.3142
TCGA_TCGA-ED-A7PX	3.07997	2.64383	2.85736	2.82528	3.34532	2.78254	2.88556	3.90027	3.2102	2.59333	4.16761	4.37161	5.75181	2.69312	6.57102	5.24978	3.95265	3.55605	2.89651	2.67836	3.55546	8.00861	2.89199	4.37349	3.65296	2.74258	2.87343	2.91184	4.92529	3.41389	2.46476	4.31088	4.14923	6.07239
TCGA_TCGA-ED-A7PZ	2.90907	2.36419	2.51411	2.63462	2.71577	2.19586	2.88787	3.47911	3.28971	2.61313	2.86556	2.3458	4.30857	2.53184	5.64698	5.3737	4.44337	3.15235	2.87166	2.37192	2.69295	3.62871	2.76246	2.64341	3.92684	2.39599	3.49205	2.49857	3.41057	2.41502	2.46476	2.87419	2.68091	4.00936
TCGA_TCGA-ED-A7XP	3.27054	2.92764	3.27182	3.04946	2.77922	2.77376	2.76971	3.58882	3.5726	2.64371	3.80003	2.75522	5.48216	2.73627	6.75771	5.57394	4.03552	7.37282	2.48321	2.93229	3.6862	4.68538	3.02426	4.62564	4.20903	3.21103	3.2932	2.91727	4.5203	2.93475	2.46476	5.26569	3.75099	5.55133
TCGA_TCGA-ED-A82E	3.02988	3.04545	2.90478	2.80539	3.00361	2.62122	3.10721	3.40951	3.65339	2.61695	4.08322	2.4562	5.30986	2.88698	6.10868	5.25144	4.36925	4.76305	2.46754	2.70311	3.72778	6.29159	2.83777	4.32584	3.92368	2.65548	2.79145	2.71922	6.61754	2.71048	2.55978	3.46984	4.01939	8.02661
TCGA_TCGA-ED-A8O5	5.6609	2.51735	2.54151	2.77889	2.74207	2.39988	2.7368	3.29342	3.37748	2.66711	3.16143	4.25468	4.53098	2.60119	6.94267	4.22804	4.57537	6.63572	2.48298	2.77269	2.82198	4.19218	2.81398	4.16927	3.4567	3.07682	3.99709	2.76895	3.65093	2.63383	2.46476	6.21903	3.85837	6.26355
TCGA_TCGA-ED-A8O6	2.71403	3.56008	2.77317	3.12961	2.90702	2.34987	3.0146	3.87297	3.21935	2.61841	3.63653	3.08673	5.11182	2.71031	5.13317	5.96928	4.6892	5.35398	2.55712	3.14259	3.66438	4.62018	2.9146	4.38351	5.60007	2.90427	4.06904	2.64939	3.89181	2.86652	2.46476	4.039	3.35066	5.42803
TCGA_TCGA-ED-A97K	5.06782	3.58068	2.94825	3.17319	3.01139	2.92933	3.10838	4.90005	4.29407	2.6502	4.50313	2.96638	6.35023	3.17421	6.32221	4.22444	3.95568	4.52286	5.44254	3.03483	4.2062	6.35392	3.07538	5.18473	5.13487	3.2615	2.94114	2.81493	7.53085	3.44456	2.46476	3.44308	3.86807	6.12541
TCGA_TCGA-EP-A12J	3.7602	2.38484	2.50607	2.6929	2.70236	3.52176	2.74925	2.43527	3.7327	2.62322	3.3343	2.44121	4.81933	2.48247	5.72446	3.42306	3.59251	5.4177	2.50409	2.68454	2.99291	4.06176	3.57078	3.64379	3.50925	2.68646	3.72091	2.7712	6.17887	2.42565	2.46476	3.93095	3.42355	6.11661
TCGA_TCGA-EP-A3RK	3.86419	4.26273	3.50133	4.11523	3.33927	3.68513	3.55344	3.15923	3.71915	2.59333	5.02359	4.67216	6.75316	3.21549	7.41149	5.45994	4.84601	5.81198	2.8219	3.60966	5.64354	5.96393	3.83327	5.57789	4.39367	3.69272	3.82991	3.35732	7.05223	3.2824	2.56926	3.73671	4.12191	5.89316
TCGA_TCGA-FV-A2QQ	3.34304	3.0541	2.61498	3.34933	2.81895	2.85118	3.02522	2.63	3.83738	2.59333	3.87835	3.40718	5.5013	2.79617	6.61515	3.58009	4.33289	7.59205	4.25349	2.97933	4.1226	4.95319	3.24759	4.84671	3.93227	2.88517	3.11927	2.70736	4.29285	2.78422	2.46476	3.7026	3.9761	4.81724
TCGA_TCGA-FV-A2QR	3.49123	2.46207	2.52701	2.77526	2.86747	2.27662	2.87651	2.49578	3.11667	2.59333	3.67634	2.34009	5.26333	2.58736	6.35206	3.61491	3.80866	2.95005	2.46754	2.78378	3.02087	6.43715	2.92064	3.56877	3.42971	2.45467	4.42948	2.5725	4.6996	2.44684	2.46476	3.52245	4.57922	5.17978
TCGA_TCGA-FV-A3I0	4.24937	3.50478	2.64559	2.74304	3.56994	2.43774	2.82529	4.94062	4.13191	2.65381	4.81766	3.98848	5.57345	2.7025	6.20138	4.83965	4.38142	4.22696	2.50492	2.80226	3.23501	7.26786	2.56423	4.47091	3.32941	2.69355	2.92611	2.7171	6.26213	2.59326	2.46476	4.04167	4.22243	6.21164
TCGA_TCGA-FV-A3I1	2.9412	3.94944	3.16209	4.01614	3.22189	3.02123	3.17285	3.913	4.09527	2.64899	4.24533	3.35549	6.16697	3.15469	6.61518	5.44217	4.82427	7.06804	2.50193	2.71378	4.61291	6.48562	3.61669	4.91378	3.78701	3.50667	3.67911	2.73326	6.29544	3.07417	2.46476	3.50388	4.26438	5.81448
TCGA_TCGA-FV-A3R2	3.3634	2.7356	2.49314	2.78623	2.87047	2.74221	2.77281	2.39986	3.19628	2.59333	3.78048	2.58474	4.96498	2.55287	6.26605	5.99554	4.07866	6.98712	2.46754	2.60353	3.20144	4.60145	2.89714	4.05101	3.33138	3.37106	3.38807	2.62191	3.72668	2.70695	2.46476	3.75727	3.70186	5.48542
TCGA_TCGA-FV-A3R3	3.02943	2.70329	2.60656	2.76403	2.88056	3.00479	2.84023	3.15141	3.56279	2.63815	4.08363	3.36665	5.77485	2.86274	6.61536	3.71854	3.80364	3.28267	2.53542	2.69009	3.69626	5.43314	3.05553	4.75231	2.90578	3.48374	3.22284	2.90995	4.9632	2.71335	2.46476	4.12185	4.35224	6.29156
TCGA_TCGA-FV-A4ZQ	2.6738	4.6921	4.87687	4.5496	3.71555	3.94331	4.00477	3.71187	4.12431	2.62144	5.14548	5.65618	6.493	3.02996	5.32593	5.4355	4.14911	2.63552	2.51871	4.35722	6.08396	5.38671	4.09032	6.35198	3.64287	3.39606	3.679	4.00007	5.29309	3.48021	2.57765	4.13532	3.97102	6.56431
TCGA_TCGA-G3-A25S	3.79827	3.26112	2.56241	3.12862	2.66584	2.72383	3.04075	2.60276	3.04551	2.59333	3.78948	2.8794	5.1576	2.54384	6.81733	6.19569	4.20523	5.55984	2.46754	2.76291	3.619	4.64964	3.09532	3.69386	3.54431	2.6172	3.94644	3.00799	3.54824	2.74271	2.46476	3.90632	2.67483	4.97566
TCGA_TCGA-G3-A25T	4.28296	2.60058	2.62063	2.6539	3.03033	2.38818	2.83118	3.36437	3.25269	2.61463	4.11122	2.65079	5.51633	2.69652	6.04592	4.39176	3.74916	5.56062	2.50644	2.84755	3.2074	6.20936	2.69505	4.60868	3.95733	2.6593	2.73519	2.48779	5.31749	2.55789	2.46476	3.24803	3.56264	5.82789
TCGA_TCGA-G3-A25Y	4.30028	3.47264	2.70787	3.4231	3.7725	2.78671	2.8751	2.7519	4.00433	2.77018	4.93609	3.77381	5.69687	2.83623	5.84756	5.36287	4.85315	5.95045	2.49304	2.78806	4.13298	6.36583	3.50341	5.50165	5.11634	3.55285	3.61436	2.55054	4.68795	3.26383	2.54856	4.98688	4.85752	6.421
TCGA_TCGA-G3-A5SL	3.87323	2.63282	2.69154	2.81778	2.7225	2.59962	2.75353	2.82394	3.07627	2.65576	3.10173	2.38659	4.56125	2.51309	6.23776	5.40053	3.06153	6.65208	2.46754	2.53287	2.96308	3.45504	2.75527	3.51665	2.99013	2.76284	3.12827	2.58405	4.48123	2.46103	2.54981	2.87899	3.15579	5.65717
TCGA_TCGA-G3-A7M6	3.04161	3.25669	2.71133	3.21827	2.95318	2.72052	3.2153	2.73684	3.08787	2.82622	3.82679	3.10807	5.2126	2.75966	5.53679	5.83863	4.59976	4.7483	3.17765	2.89037	4.37938	5.109	3.1253	5.49122	4.40726	3.725	3.44724	3.32107	4.92268	2.66366	2.68482	4.47829	4.97756	7.00021
TCGA_TCGA-G3-A7M9	3.01319	3.13573	3.07445	3.03398	3.02978	2.46555	4.02928	4.69932	3.24068	2.6965	3.86365	3.56917	5.10442	3.03204	6.11024	5.34817	4.34752	4.98023	3.6993	4.02038	4.02698	4.45437	2.98515	4.50267	4.766	2.47295	4.13822	3.09978	4.77864	2.8043	3.30584	5.51434	3.63371	5.4801
TCGA_TCGA-G3-AAV1	2.82699	2.65585	3.34673	2.63731	2.9539	2.54646	2.76038	2.8869	3.15491	2.59333	3.47776	2.30354	4.96468	2.54212	5.57956	5.53106	4.41283	6.33157	2.48168	2.71923	2.82639	4.39506	3.05197	4.00055	3.00711	2.55488	3.44701	2.97047	4.35067	2.71826	2.46476	3.16111	3.84234	5.39242
TCGA_TCGA-G3-AAV3	6.40318	3.99717	4.60559	3.59763	3.47905	3.14272	3.40642	3.44326	3.16685	2.61905	4.16195	4.35022	5.70998	2.99199	6.53228	5.54544	4.90694	3.16585	2.4834	3.22612	5.60863	5.20375	3.35311	5.68072	4.06709	3.29052	3.20471	3.13726	5.24693	2.5993	2.46476	3.92502	3.80107	6.18213
TCGA_TCGA-G3-AAV4	5.18137	2.35567	2.55167	2.6705	3.04021	3.04337	2.82808	3.84725	3.13244	2.6245	3.7859	2.4254	4.65862	2.53531	5.82184	3.60803	4.08633	6.46261	2.46754	2.55056	3.00887	4.52192	2.84651	3.87726	3.39943	3.08487	3.69647	2.61263	3.71701	2.59773	2.46476	3.00636	3.62454	6.82338
TCGA_TCGA-G3-AAV6	3.26725	3.81014	2.62671	3.08745	2.86822	2.28454	3.02534	2.51762	3.55781	2.59333	3.26288	2.47548	4.45913	2.6823	5.8817	5.63453	4.90663	6.24069	2.51493	2.61684	3.68951	4.4182	2.84174	4.17031	4.27226	2.74004	3.71412	2.6388	3.56759	2.38794	2.46476	6.16431	3.45908	4.96647
TCGA_TCGA-G3-AAV7	3.17232	3.48915	2.8409	3.33476	3.4793	2.88803	3.00577	3.01307	3.17048	2.59333	5.00155	2.97512	7.11351	2.71484	5.18368	5.07946	4.24548	4.79562	3.12455	2.61624	3.62271	6.84513	3.35707	4.95302	3.69412	2.91929	3.42543	2.95655	7.09977	2.92464	2.59448	5.09385	3.66079	6.55875
TCGA_TCGA-GJ-A3OU	4.72036	4.59376	3.88837	4.12044	4.35137	4.56818	3.51365	3.78341	3.06219	2.69114	5.9169	3.45475	7.54127	3.43744	6.33567	5.97275	5.50779	4.65604	2.48813	4.15187	5.10204	7.02591	4.05017	7.42369	4.94667	4.72848	3.53297	2.99053	7.33438	3.05204	2.59861	3.63378	4.75313	6.1424
TCGA_TCGA-GJ-A6C0	3.02095	2.98694	3.72791	2.82543	3.17282	4.88101	2.978	3.83943	3.36262	2.59333	4.53814	3.25387	6.23649	2.6669	6.06708	3.60804	4.19739	6.57889	2.6328	2.90692	3.5031	5.0685	3.19406	4.48424	5.44108	3.13459	3.52206	2.51502	6.40129	2.67936	2.46476	3.51587	3.01818	5.21737
TCGA_TCGA-GJ-A9DB	3.46639	3.03505	2.86448	2.84034	3.11211	2.64369	3.68838	2.98135	3.45849	2.74433	3.9911	2.73277	5.67315	2.70938	6.77635	5.70059	4.12614	4.47414	2.87188	2.62916	3.62259	5.17529	3.50359	3.83129	3.71152	2.60762	3.41204	2.8494	6.47133	2.49049	2.46476	3.75902	4.15889	5.65575
TCGA_TCGA-K7-AAU7	3.29886	3.83083	3.39762	3.6483	3.05355	2.69175	3.41863	3.75602	3.26579	2.59333	4.38801	3.11818	5.78025	2.92089	5.978	5.22947	4.17325	7.09918	4.27212	2.8574	3.88326	6.19568	3.07629	4.66077	4.19463	3.26188	3.11369	2.89824	7.14137	3.58334	2.46476	3.7315	4.39529	6.33472
TCGA_TCGA-LG-A6GG	4.16104	2.58319	2.52787	2.72164	2.72484	2.26013	2.70447	2.75101	3.01395	2.59333	3.14972	2.41207	4.55535	2.47974	6.27054	4.23182	3.29152	3.49024	2.46754	3.30824	2.98142	4.07411	2.51094	3.33061	2.89744	2.65519	3.81167	2.85114	3.09002	2.655	2.46476	3.55807	3.37863	4.65064
TCGA_TCGA-LG-A9QC	2.715	2.71016	2.56204	2.75997	2.76245	2.51331	2.81858	3.90551	4.41345	2.73331	2.92421	2.52086	4.43983	2.5309	5.67197	4.9712	3.93155	3.01904	2.46754	2.61064	3.41533	3.9407	2.63399	3.47925	3.33254	2.43303	3.84728	2.70438	5.84869	2.39441	2.46476	2.84047	3.7992	6.29897
TCGA_TCGA-MI-A75I	4.42741	2.8057	2.59343	2.99577	2.69091	2.68814	2.80353	3.02279	3.86499	2.61935	3.51882	2.66255	4.84753	2.60624	5.65527	4.67892	4.0308	2.75891	2.56037	2.67654	3.40032	4.65436	2.93615	3.80468	3.43838	2.70344	3.68213	2.52295	3.90239	2.48867	2.46476	3.41661	3.05749	4.7803
TCGA_TCGA-RC-A6M6	4.72996	4.00984	2.72723	3.50796	2.8756	2.53258	3.65735	3.70365	3.02622	2.59333	3.74522	5.55744	5.17166	2.8401	7.00733	5.41512	4.03684	6.04338	2.57829	3.25982	4.09002	4.42723	3.21941	4.13548	4.63364	2.499	3.43363	2.52608	4.19756	2.46823	2.46476	2.86512	2.93197	5.72562
TCGA_TCGA-RC-A7SK	3.84011	2.61889	2.51958	2.84801	2.63102	2.11752	2.79682	2.65828	3.3215	2.59333	2.66893	2.4088	4.20648	2.49344	5.88871	4.41814	2.97527	5.32036	2.51247	2.4633	3.3518	5.18394	2.52894	3.21512	3.25371	2.41527	3.74445	2.68029	2.98661	3.19353	2.46476	4.21235	3.10018	4.40449
TCGA_TCGA-RG-A7D4	4.7929	4.74277	3.83571	4.02401	3.01028	3.30186	3.7665	3.32298	3.13	2.70445	4.58975	4.89144	5.63666	3.10305	6.87546	5.96582	4.43719	7.20702	2.53648	3.69927	5.85281	4.94536	3.60637	6.02776	4.55376	3.60288	3.52128	2.97078	4.9064	2.60236	2.46476	3.34052	3.65153	4.44371
TCGA_TCGA-T1-A6J8	3.33704	2.53933	2.50836	2.65602	2.6467	2.43208	2.75892	2.55022	2.99343	2.59333	3.42519	2.39566	4.87801	2.51626	5.68749	5.30064	3.02329	4.0651	2.52208	2.52946	3.09021	6.45399	2.70148	3.49308	3.52091	2.75655	3.10676	2.50939	4.58093	2.42593	2.46476	3.75341	3.17774	5.19801
TCGA_TCGA-UB-A7MA	3.66693	2.95862	2.77166	2.9675	2.85244	2.31165	2.91582	4.2882	3.16776	2.62716	3.50243	2.91035	4.96424	2.67811	7.38778	4.88376	4.21114	7.46581	2.82307	2.72134	3.52666	5.36977	2.77546	4.21954	3.33579	2.75034	3.98057	2.95791	5.37235	2.50105	2.60039	3.58084	4.20712	6.3344
TCGA_TCGA-UB-A7MB	2.60597	2.38214	2.52047	2.64214	2.83637	2.41828	2.67072	2.87785	4.08289	2.78179	2.76915	2.36587	5.66464	2.4817	6.17075	5.06722	3.80088	6.84929	2.51952	2.58879	3.00349	3.85932	2.81701	3.14587	4.33332	2.43068	4.94407	3.22849	3.5542	2.52841	2.46476	3.93307	2.95561	5.42345
TCGA_TCGA-UB-A7MC	4.75831	2.79517	2.68225	2.84334	2.83312	2.6765	2.69849	3.58266	3.52621	2.67422	3.19857	2.47752	4.41066	2.55687	6.62204	3.40119	2.86429	3.66675	2.48028	2.50257	3.07177	3.55648	2.74253	3.44192	3.39898	2.3995	3.36345	2.7683	5.16381	2.84533	2.46476	3.78783	3.09543	5.16737
TCGA_TCGA-UB-A7MD	3.32592	3.42552	3.20119	3.40196	3.989	3.12333	2.98386	4.18072	3.76418	2.59333	4.56395	3.0675	5.67068	2.7506	6.23299	4.57514	4.23568	5.31392	3.06746	3.00325	3.68877	5.67298	3.52031	4.99227	4.97485	3.03763	3.73222	2.86133	5.76971	3.46067	2.46476	3.48933	4.27973	5.70719
TCGA_TCGA-UB-AA0U	4.89708	3.04211	2.7265	3.16812	2.98039	3.27239	2.93297	3.69511	4.81805	2.59333	4.19689	2.91923	5.62283	2.86937	6.90386	3.38648	3.56074	5.8273	2.51755	2.80559	3.86014	5.19749	3.34118	5.08833	3.81214	3.54108	3.92253	2.81692	4.95035	2.59252	2.46476	3.20695	4.11348	6.21218
TCGA_TCGA-WX-AA44	3.55195	3.41378	2.62513	2.88914	2.81118	2.5845	2.77298	4.30976	3.29534	2.63259	3.72241	3.68545	5.64361	2.63393	6.58209	5.65553	3.84351	5.20322	2.51546	2.68675	3.6254	6.19784	2.83414	4.21845	4.20072	3.1634	3.63505	2.71464	4.16104	2.59371	2.46476	5.68846	3.87372	5.39156
TCGA_TCGA-XR-A8TE	2.46536	2.76657	2.66014	3.17731	2.9767	2.48915	2.74221	3.44573	3.12232	2.59333	3.21892	2.69287	4.68825	2.51148	6.29223	5.69413	3.23645	2.93208	2.50075	2.65815	2.87324	3.64552	3.12909	4.0773	3.67796	3.47416	4.02149	2.6087	5.72571	2.51948	2.46476	4.99528	2.99853	6.27128
TCGA_TCGA-XR-A8TG	2.6677	2.89391	2.84543	3.24698	3.03891	2.50612	2.77638	2.72953	3.04658	2.59333	3.90101	2.69375	5.13815	2.76497	6.25485	3.80079	3.93865	6.37318	2.82394	2.49214	3.15462	4.09344	3.74526	3.50327	3.32372	2.73722	3.37169	2.72403	5.57062	3.38702	2.46476	3.55858	3.99049	5.39363
TCGA_TCGA-YA-A8S7	3.39109	3.7745	4.16169	3.21279	3.21688	3.73512	3.70772	3.09637	3.15896	2.71079	5.68959	3.45337	8.16055	3.10287	5.16768	4.35914	4.01479	6.00154	2.76254	4.34807	4.26821	6.86388	2.88059	5.51092	3.98163	2.79601	3.31949	3.08231	7.8171	2.61635	2.46476	4.03984	3.62732	7.3739
TCGA_TCGA-ZP-A9CZ	2.72558	3.76307	2.86117	3.46795	3.14705	3.24509	3.11903	2.80192	3.084	2.62292	4.47686	3.61093	6.41594	2.90652	5.47908	3.23894	4.70121	3.92012	2.46754	3.03821	5.20444	5.16926	3.79849	5.41539	3.79924	3.37876	3.69912	2.72837	5.22996	3.11668	2.46476	3.89679	3.42314	5.62948
TCGA_TCGA-ZP-A9D0	2.81091	2.6247	2.56262	2.92102	2.72496	2.48052	2.76882	3.90804	3.08606	2.59333	3.08969	2.35191	4.62541	2.54941	6.0447	5.54094	3.05411	4.26383	2.46754	2.74897	2.98182	4.31377	2.67912	3.56422	3.68698	2.5757	3.4626	2.68569	3.27	2.57322	2.46476	3.979	2.76095	4.73551
TCGA_TCGA-ZP-A9D1	4.16231	3.36649	2.76679	3.10847	2.79829	2.89146	3.15492	2.5284	3.1197	2.70402	3.39308	2.74256	5.01871	2.66092	6.46509	5.57744	4.04758	5.17661	2.48513	2.84693	3.45563	5.19908	3.27048	4.77802	4.5498	3.78779	3.49367	3.38735	4.84305	3.03661	2.46476	3.69098	4.33284	5.60692
TCGA_TCGA-ZP-A9D2	4.40665	3.1863	2.70585	3.31731	3.12229	2.97649	3.03136	3.55162	3.0405	2.65056	4.47751	3.38988	5.80299	2.69077	6.77498	4.86401	3.46314	5.49882	2.58651	2.5001	4.29228	7.38695	2.94266	4.78955	4.12033	3.11564	3.02243	3.20774	5.1644	2.5306	2.58084	5.59585	3.85957	6.10146
GSE14520_GSM362966	3.46674	2.25057	2.55108	2.7755	2.49997	2.61235	3.23981	3.17727	3.4834	2.5766	3.7471	3.43461	5.11638	2.71411	6.23405	3.53803	3.04289	6.60452	2.44304	2.927	3.66352	4.66525	2.87986	3.714	3.20396	2.69574	3.02807	3.33411	4.13886	2.9028	2.46819	3.15992	3.25074	5.51755
GSE14520_GSM362971	4.12929	2.15503	3.17468	2.79948	2.8219	3.45359	3.44486	2.99765	3.13153	2.64542	3.96169	2.03494	5.72511	2.62399	6.42181	4.63107	3.99384	4.13097	3.4351	3.75903	5.57822	5.77238	2.7065	5.65587	4.37435	2.46404	3.05535	3.74105	4.68267	2.48018	2.61591	3.04268	2.79885	5.66739
GSE14520_GSM362972	2.9952	2.69118	5.07089	2.9728	2.92404	3.43833	3.65467	3.47674	3.86607	2.42249	3.46257	4.27869	4.56091	2.88895	5.84001	3.80948	3.41854	5.79214	3.17273	2.89892	3.55402	5.09111	3.1657	4.49423	3.62604	2.61183	3.11313	3.0931	4.69855	2.86565	2.51362	3.70073	3.10842	5.80833
GSE14520_GSM362976	4.59698	2.93516	3.26797	2.67415	2.80592	2.5172	3.41928	3.50097	3.39113	2.54824	4.04858	3.17184	6.59601	3.19685	8.28968	4.60704	3.87469	7.86706	3.06258	2.52192	2.96194	6.27396	3.1806	5.02726	3.80014	3.28213	3.3409	3.08177	4.96351	2.86463	2.50302	3.1938	3.22072	6.26666
GSE14520_GSM362977	3.58636	2.6008	2.75817	2.54741	2.56897	2.95508	4.76717	2.83088	4.43426	2.49761	3.36353	6.86819	4.77844	2.62281	5.94032	5.08731	4.02363	6.46174	3.05353	2.7813	4.8351	4.12889	3.03446	4.25305	3.97344	2.50902	3.14788	2.94026	3.51761	2.73696	2.38844	3.11727	2.89968	4.05829
GSE14520_GSM362978	3.16465	2.31421	2.40019	3.06701	2.72037	2.94241	3.89673	3.40889	4.0836	2.6073	3.35227	2.97912	5.71983	2.71447	6.52763	4.73059	3.31222	5.70711	2.82203	2.52823	3.48398	4.53845	3.19353	3.753	3.52564	2.88951	3.1402	2.79542	5.07259	2.7236	2.46819	3.14802	3.42475	6.00844
GSE14520_GSM362984	3.93607	2.80352	2.47869	2.96469	2.99251	3.68335	2.98045	2.66108	3.40713	2.73539	4.2694	2.41493	6.11878	2.97513	6.58733	4.54809	4.75614	7.72468	2.42442	3.25638	5.31925	4.38527	3.14968	6.17879	3.31516	2.69048	3.38156	4.13514	4.34406	2.48544	2.4369	3.79944	3.49286	6.55694
GSE14520_GSM362986	3.25635	3.30278	2.57741	3.98471	2.88532	3.56166	3.04294	3.34362	3.34254	2.69195	5.53179	2.41674	6.13536	2.92181	6.23908	3.80013	3.83368	2.83009	2.47918	3.52677	5.11288	5.09277	2.83326	6.8994	4.16958	3.17751	3.61175	2.99621	4.97942	2.47657	2.48457	4.45186	3.90804	5.24016
GSE14520_GSM362993	2.8478	2.87166	2.41433	2.979	2.68488	2.97776	2.57722	2.52928	3.1154	2.65483	3.60947	2.28634	5.13258	2.60303	5.98367	4.03217	3.44974	5.36574	2.61983	3.01552	3.0867	4.22384	2.74157	4.0256	4.57444	2.5142	3.63014	2.99356	3.96929	2.35392	2.42643	4.23813	3.30057	5.43915
GSE14520_GSM362994	2.99251	2.7205	2.40877	2.55746	2.79837	3.22277	2.93862	3.77234	3.6427	2.64249	2.89751	2.89373	5.7922	3.09006	6.14241	5.64259	3.69148	5.46253	2.2731	2.53982	4.15942	4.01641	3.264	3.67391	5.45973	2.42791	3.63239	2.4617	5.04313	2.56607	2.54852	3.70321	3.14752	5.16077
GSE14520_GSM363008	4.02666	2.47366	3.61203	4.20628	3.14844	3.2469	2.93084	3.29281	4.12906	2.5899	4.03961	3.01977	5.80951	2.65363	6.67222	4.44281	2.99718	4.77079	3.37447	2.9797	3.76342	5.59534	3.42301	5.79818	5.05417	3.55896	3.05749	2.2645	7.47532	2.72421	2.44008	2.74048	3.20452	5.6548
GSE14520_GSM363009	3.36854	2.94965	3.22118	3.21953	2.86818	2.83267	2.68295	2.33095	2.95305	2.43893	3.68212	2.40481	5.4026	2.16016	5.70521	3.4502	2.93419	3.90797	2.6128	2.27237	3.13552	5.72267	3.24912	4.16349	3.70146	2.10983	3.03322	2.14617	5.5418	3.06903	2.69227	4.54452	3.92565	6.07632
GSE14520_GSM363011	5.48405	2.22771	2.18563	3.14915	2.86498	2.94073	2.23336	2.56801	2.96265	2.54096	3.70516	2.32884	4.93801	2.60254	7.58399	4.38633	2.97922	3.63629	2.87151	2.55423	3.21308	4.18626	3.06113	4.18516	3.78079	3.19443	2.99821	2.30514	4.1161	2.80245	2.46819	3.1738	3.59857	5.60678
GSE14520_GSM363012	3.51762	2.30843	2.65137	3.32744	2.89256	2.40205	3.3301	2.91617	4.37097	2.55021	4.18682	2.77043	5.12796	2.75254	6.02234	5.54337	3.34793	3.84533	3.35993	2.21637	3.44941	4.19427	3.03151	4.08651	3.08544	3.72437	3.15317	2.81879	4.29491	2.92389	2.38045	3.16325	3.51342	5.18899
GSE14520_GSM363014	3.08468	2.37524	2.70987	2.85207	2.46859	2.14196	2.76177	3.17289	3.34079	2.6052	3.16662	3.86275	4.78421	2.653	6.19094	5.88088	4.52572	5.87555	2.62242	2.74671	3.07596	4.81661	2.94831	4.35793	4.35879	3.12562	4.05415	2.8998	3.91488	2.49672	2.54037	4.65205	4.02002	4.85527
GSE14520_GSM363015	5.1458	2.93276	2.65492	3.07174	3.04485	2.77035	2.72822	2.73658	3.37501	2.66766	4.1031	3.17977	4.34822	2.81396	6.98808	4.79368	3.52842	4.99653	3.07541	3.20662	2.86458	4.66493	3.37458	4.84133	3.22145	2.04922	3.7028	2.69158	4.71267	2.42199	2.52318	4.9258	3.77633	6.3038
GSE14520_GSM363016	2.57903	3.38018	2.52646	2.86292	2.91509	2.04478	3.3292	3.87937	3.12727	2.59122	3.02498	3.04452	5.76651	2.69121	6.13327	5.64803	5.04737	4.16692	2.57254	3.49021	3.636	4.87772	3.16697	3.68992	3.99467	3.44972	3.6363	2.54572	5.76261	2.81456	2.43765	3.17607	3.47838	6.91382
GSE14520_GSM363029	2.98995	3.35314	2.86599	3.2547	2.96047	2.72398	2.8317	3.39473	2.94851	2.54557	4.91549	2.51356	6.25221	2.64063	6.84637	4.18109	3.71282	5.2591	2.71233	2.95654	4.55129	4.71406	3.13802	6.90153	4.13502	4.44259	3.34314	2.5119	5.9729	2.61233	2.43977	3.94452	4.38662	5.93651
GSE14520_GSM363030	3.45414	2.66922	2.59752	2.71157	2.84187	2.4255	2.54199	4.29199	3.21229	2.53853	3.38452	2.715	4.87452	3.21698	7.18941	4.6909	3.80647	4.98583	2.50413	2.24546	2.52738	5.86089	3.24912	3.28336	3.21652	2.52327	3.50027	2.41527	4.44351	2.49014	2.57912	6.08354	3.45703	5.31635
GSE14520_GSM363031	3.13963	3.17571	2.98208	3.50144	2.94619	4.27195	2.72262	2.72117	3.2378	2.48585	3.59556	2.40858	5.59301	2.29712	7.43577	5.52002	3.73893	4.94251	2.63565	2.09836	2.84649	3.67559	2.94726	4.7463	4.32789	3.6807	3.09554	3.18099	4.2702	3.35226	2.58153	3.14004	3.64594	5.56694
GSE14520_GSM363034	2.89601	3.65204	3.35115	2.72024	2.94033	2.86293	3.27666	2.19386	3.82425	2.53236	3.60669	4.80048	4.4443	2.51721	6.58629	5.11417	3.4951	5.52574	2.71609	2.46894	2.46547	4.93922	3.0487	4.54259	3.96338	2.70418	3.03573	2.45012	4.16931	2.95255	2.56096	4.59237	3.64131	5.20635
GSE14520_GSM363035	4.1951	3.24756	3.01143	2.75185	2.53251	2.21075	2.48832	4.19754	4.31356	2.66732	3.25622	2.84623	6.01144	3.26513	5.83381	5.90601	2.98657	6.0368	3.00162	2.38222	3.79568	4.03559	3.48692	4.46458	4.57864	4.16743	3.33345	3.34962	4.26303	3.63166	2.48109	2.90679	3.42787	5.91042
GSE14520_GSM363036	2.87705	2.65482	3.01973	3.29239	2.61931	2.71939	3.33045	3.2614	3.47039	2.67082	3.15214	3.75489	4.2165	2.73395	4.90667	4.83885	3.57856	5.3873	2.76572	2.33918	2.75831	4.53029	3.30644	2.4449	3.46167	2.61335	3.34935	2.23611	3.21897	2.58073	2.36066	3.05824	3.45362	5.24997
GSE14520_GSM363038	4.3438	2.63365	2.58016	2.79528	2.85095	2.52693	2.7253	2.70807	2.92546	2.57336	2.92395	3.05291	9.55815	2.79482	6.95687	4.38499	3.46916	5.42483	2.95234	2.73913	3.52872	4.27325	2.88216	4.03995	3.41898	2.85053	3.28885	2.77109	3.64207	2.80472	2.52826	3.63314	3.58666	6.61861
GSE14520_GSM363039	3.58421	2.80335	2.46316	2.82905	2.70293	2.43696	3.41292	2.92659	3.81048	2.56081	2.93292	3.91164	4.64105	2.71667	5.89554	5.60357	3.96868	4.62693	2.56415	2.79719	3.32518	4.18651	3.00521	3.39607	3.35879	2.90313	3.55618	2.79269	4.05047	2.70667	2.60676	2.94893	3.43898	5.84889
GSE14520_GSM363049	2.95655	2.87996	3.3862	2.9248	3.01074	2.78333	2.84328	3.26693	3.28967	2.53726	2.8417	2.6693	4.87897	2.67341	6.64498	4.24626	3.40645	6.25811	2.75031	3.08345	2.56508	4.02419	3.37418	4.11594	3.29694	2.42993	3.51052	2.79811	3.94422	2.42946	2.46004	3.10049	3.38556	5.71837
GSE14520_GSM363050	2.99115	3.30057	2.18983	3.33853	2.85851	2.16777	3.18178	2.30368	3.44656	2.55883	3.38435	1.79489	4.62359	2.76552	5.85802	5.56095	3.11933	4.30596	2.41267	2.27381	4.22858	5.17012	2.8088	3.81721	4.73222	3.0089	3.69889	2.67828	3.87464	2.65151	2.35522	4.89245	3.64719	5.08039
GSE14520_GSM363053	3.2144	3.27884	2.59264	2.96784	3.08241	2.20912	2.94408	2.5898	4.20049	2.34455	3.9892	2.86835	5.57242	2.72741	6.79661	5.08905	4.09053	2.93263	3.11589	2.47487	2.95757	3.85559	3.09078	4.17822	3.45701	2.44041	3.18819	2.86108	4.39316	2.1686	2.35706	3.02904	3.38876	5.02858
GSE14520_GSM363055	2.48137	2.17217	2.50233	4.16835	3.55879	3.12282	2.48643	3.45521	3.59764	2.59379	3.94226	2.85259	5.47876	2.52086	6.01723	5.55035	5.10689	4.29187	3.63363	2.51457	4.6261	7.49251	3.28063	5.90542	5.34598	4.86955	3.04506	2.48919	6.04116	2.83704	2.44689	4.01114	4.98688	7.16761
GSE14520_GSM363056	3.22302	2.71185	3.57119	2.18586	3.05142	2.37838	2.16877	2.61708	3.23249	2.54931	2.93083	2.95157	4.66736	2.63221	5.64698	5.043	3.51924	5.20276	2.74233	3.51023	2.62947	3.72842	2.86444	3.18625	3.3966	2.40104	3.35026	2.58638	4.0235	2.68305	2.5281	3.03831	3.24382	5.45648
GSE14520_GSM363069	3.95395	2.73197	3.05399	2.81684	2.95709	2.74762	2.93268	2.39745	3.225	2.6503	3.64759	2.06758	5.80911	2.69693	6.68566	5.71934	4.12815	4.08561	2.68897	2.91496	3.09433	4.833	3.00637	4.54115	3.25423	3.00406	3.24742	2.5987	4.39104	2.50636	2.4641	5.25235	4.37939	5.94137
GSE14520_GSM363072	3.53685	2.50787	4.60028	3.73714	2.99004	2.73637	2.85323	2.85089	3.22525	2.587	4.55484	2.57995	5.44531	2.61356	6.63348	4.21671	3.59183	3.4523	2.39849	3.63349	5.47183	4.2862	3.48692	5.83088	3.46764	2.51689	3.6536	2.83275	5.11296	2.57555	2.27144	3.18775	3.32329	4.52508
GSE14520_GSM363074	2.54728	3.1533	2.81765	2.93764	2.84104	3.42424	2.70885	3.89008	3.12581	2.64443	3.63622	1.66627	5.54483	3.5519	6.22575	4.83228	3.34527	3.027	3.64515	2.31688	3.91231	4.60286	3.21314	6.5897	5.58587	2.95153	3.24606	3.20503	6.13761	2.64744	2.31959	3.63884	4.6466	5.92863
GSE14520_GSM363077	2.91627	2.38688	2.89988	3.16904	2.86467	2.84828	2.78323	3.26373	3.97867	2.73938	3.28486	4.40475	4.79543	3.16152	6.66211	4.03936	3.02693	4.52579	2.78411	2.71984	3.2232	4.64513	3.22266	3.38536	4.29266	2.34732	3.55331	2.79013	3.64493	2.47298	2.3163	3.83092	2.9638	5.125
GSE14520_GSM363082	3.31586	3.01402	2.20126	3.28639	2.90516	3.52945	3.79133	2.32704	3.18771	2.53186	3.31144	2.84749	4.70129	2.57033	6.70501	5.8065	3.71249	7.13404	2.6745	2.34826	3.24053	4.19578	3.30491	3.76736	6.10448	3.06032	3.20922	2.23388	3.63595	2.61946	2.38574	3.57474	3.03807	4.97164
GSE14520_GSM363098	3.26396	6.96677	5.14754	3.05877	3.70801	1.59611	3.50278	3.72312	2.9931	3.45075	3.35574	2.28085	3.99448	2.42081	7.0779	6.13701	3.39381	3.67083	1.78368	3.24646	2.56479	6.64733	3.16744	5.2149	2.22619	1.74126	5.51535	3.0193	4.42095	2.19295	2.86369	4.46566	3.27558	3.92271
GSE14520_GSM363099	4.8407	5.70198	3.9453	2.4887	4.909	1.6887	3.22548	5.79676	3.26253	2.92251	4.0651	2.45964	4.84974	2.43721	6.28143	4.95366	3.08154	3.52578	1.93642	3.20429	3.94685	7.36147	3.69312	3.12716	2.81498	2.69574	3.95689	2.22798	7.9291	3.03231	2.85091	3.60516	4.33598	5.79512
GSE14520_GSM363101	6.27937	3.24916	2.23938	3.08035	2.54075	2.46962	3.03613	2.78485	3.52439	2.73775	4.14778	3.71162	4.90328	2.72015	7.12433	4.18368	4.39077	6.69591	2.76818	3.16483	3.96333	4.35199	3.06301	4.57488	4.36719	2.8242	3.43965	2.67037	4.43413	2.51901	2.40815	3.33442	3.39145	5.15071
GSE14520_GSM363104	3.63988	3.4258	2.94652	2.95291	3.11228	2.80586	3.66204	2.7492	3.44987	2.7418	3.46889	4.07427	4.8357	3.03796	6.23362	4.58156	3.46953	3.83501	2.61963	2.84962	4.3334	4.54287	2.98701	3.69564	3.42892	2.60746	3.90345	3.17481	3.97008	2.3025	2.38416	3.81392	3.10815	5.52873
GSE14520_GSM363108	3.03482	2.77099	3.36476	3.4388	3.23219	2.88073	3.3686	2.57991	3.51199	2.83137	3.7666	2.68243	5.26645	2.71272	6.63582	4.98834	4.04583	7.91883	2.28157	3.40332	4.62116	4.62389	2.88595	4.765	3.56443	2.86714	3.42239	3.38517	4.7244	2.41291	2.475	3.46518	2.97835	4.35089
GSE14520_GSM363115	3.49161	3.15966	2.91428	2.93854	2.8328	2.34899	2.72318	3.12144	3.01619	2.72951	4.00029	2.96308	4.65742	2.72793	7.03264	5.73576	3.73997	5.54565	2.00795	2.70635	5.1336	4.60114	2.98576	6.35768	4.59503	3.11552	4.11744	3.29944	4.85961	2.45684	2.34169	4.03518	3.81726	5.4095
GSE14520_GSM363121	5.05886	3.53209	2.63364	3.58525	3.42802	2.11469	4.75363	3.64866	3.40347	2.67522	3.58446	3.90673	5.48897	2.81284	6.93732	5.34832	5.65981	8.07142	1.99508	3.14077	3.89588	5.3244	3.30161	4.7607	3.02194	2.0402	3.1582	2.41747	7.49503	3.34569	2.91466	4.01319	4.79252	6.81565
GSE14520_GSM363124	5.40818	2.93833	2.65051	2.67571	3.13414	2.3164	4.05106	2.95286	3.43114	2.68702	3.48395	4.34456	4.71562	2.28418	7.71919	6.252	4.21204	5.2149	2.97183	2.99815	4.02834	5.02486	3.20956	3.49757	3.63516	2.9278	3.73503	3.13652	3.91996	2.67919	2.36957	3.23345	3.45893	6.67681
GSE14520_GSM363125	3.04199	3.2523	3.26362	3.32602	2.69696	2.10478	3.54071	3.47457	3.11095	2.70356	3.71402	3.50712	4.71666	2.72985	5.5599	5.14006	4.86855	5.82418	2.5011	2.27051	4.50322	5.01185	2.9873	5.03944	3.53481	3.38419	3.57521	2.54961	4.7466	2.76511	2.54231	3.25613	4.07689	5.76453
GSE14520_GSM363128	3.83731	3.64556	3.06697	2.84062	3.0572	2.52404	3.54774	2.69333	3.6707	2.70515	2.99012	2.76303	4.68566	2.74865	7.07827	4.96858	3.72161	4.62944	3.0062	2.33872	3.42426	4.29182	3.01161	3.28486	4.15476	3.53542	3.15934	2.62523	4.58701	2.91292	2.54114	2.94832	3.37013	4.82417
GSE14520_GSM363130	2.93314	3.04372	2.79274	2.75249	3.57891	2.78473	3.68172	2.74602	3.62195	2.62633	2.9111	3.96799	5.18848	2.7829	6.85679	4.48426	3.6681	4.78042	3.76786	2.36163	3.28273	4.31624	3.12046	3.03385	3.81883	3.0332	3.32784	2.94787	4.86003	2.74668	2.43264	3.18866	3.52357	6.20301
GSE14520_GSM363143	2.99451	5.7384	2.71476	2.7377	3.59773	1.91611	3.7154	4.20915	3.04306	3.02891	2.93635	4.60793	5.61715	2.55865	6.15197	5.34136	3.61315	3.16982	1.99508	3.42527	2.97212	4.75826	3.64826	5.28101	2.72125	2.64127	3.53467	2.15901	8.52806	2.90215	2.6057	3.17416	5.12742	7.11636
GSE14520_GSM363144	3.45951	3.08545	3.23741	3.19412	3.12972	2.42338	3.24124	2.62969	3.49068	2.76944	3.79802	2.80706	5.37927	2.97369	5.66469	4.60147	4.59352	3.37409	2.49748	2.32361	3.65904	5.96352	3.13768	4.16401	3.80724	2.81595	3.43826	2.78649	5.44323	2.38049	2.4089	3.21307	3.32303	4.95509
GSE14520_GSM363145	2.72034	3.26931	3.21629	3.45459	2.71854	2.29145	3.01445	2.84614	3.19788	2.70527	3.52837	2.4848	4.68665	2.70219	6.92252	4.22682	3.47263	3.90534	2.16672	2.93554	4.32231	5.74068	3.30763	6.16466	3.53911	2.13557	3.5682	4.138	4.86414	2.20929	2.5007	3.17607	3.87777	6.8616
GSE14520_GSM363146	3.86991	3.83399	4.08026	4.29222	3.24351	3.13524	3.43167	3.44421	2.84041	2.75933	4.23173	3.28636	5.87275	2.57835	6.09899	5.51895	3.43079	4.21553	2.07412	4.65166	6.01679	9.25503	3.03284	6.45612	4.63355	2.62894	3.50901	2.64481	5.82832	2.36432	2.37744	4.89245	3.644	6.96232
GSE14520_GSM363148	3.07476	3.64528	2.935	2.71351	2.80501	2.803	3.79069	2.87205	3.40992	2.8377	3.81768	3.34107	5.41471	2.77848	5.79513	4.58964	3.9621	3.05545	2.63795	2.29116	4.1053	5.041	3.18157	5.09058	3.84204	2.7865	3.81553	3.20503	4.42838	2.55396	2.31124	4.04818	3.1377	5.17666
GSE14520_GSM363149	2.68587	2.73835	2.98456	2.80022	2.7079	3.14015	3.1746	2.74867	3.25928	2.62454	3.09749	3.0992	5.0878	2.55748	6.0438	3.30438	4.68352	4.03007	2.46638	2.65617	4.49713	4.54076	2.77414	3.57721	3.73723	3.1194	3.24143	3.00505	3.62377	2.23353	2.54943	3.19648	3.05536	6.17128
GSE14520_GSM363164	3.71337	2.97809	3.15375	2.75583	2.73959	3.00197	3.19314	2.05964	3.9099	2.79278	3.86036	3.21485	4.73535	2.69852	6.03736	5.58849	3.34099	5.97511	2.53684	3.24451	3.27961	3.92131	3.07089	4.01123	5.12805	2.99286	3.48739	2.65461	3.78201	2.4612	2.68318	5.41024	3.40118	4.53628
GSE14520_GSM363166	2.82524	3.27905	2.61017	2.60994	2.9714	2.71117	2.8057	2.43206	3.61892	2.57745	3.24372	2.51223	4.64953	2.33959	6.99896	5.19686	3.34415	5.64879	2.23084	3.02843	3.2242	3.79975	2.92495	3.63665	3.16372	2.99172	3.58452	2.8655	4.2787	2.54288	2.56185	3.52823	3.43572	3.63397
GSE14520_GSM363168	4.04318	3.60125	2.63467	2.70054	2.79797	2.95738	2.68272	2.19754	3.47207	2.65292	2.91928	3.38405	4.63099	2.37759	6.76149	4.52048	3.90486	5.5904	2.98511	2.90002	3.03497	3.94958	2.94952	3.26428	3.26526	3.17083	3.39894	2.6804	3.59827	2.72961	2.37903	3.14678	3.30929	5.49845
GSE14520_GSM363172	2.86267	2.64983	2.80449	2.82146	2.62947	2.76588	2.65226	2.69333	3.05865	2.62888	3.99695	2.85003	5.26764	2.64225	5.85211	5.35051	3.71022	2.66209	2.80565	2.88676	3.39423	5.14583	3.14792	3.71492	4.35965	2.87068	3.52682	2.62184	5.0759	2.4143	2.42457	3.4978	3.34685	5.53282
GSE14520_GSM363174	2.7385	3.18106	3.14915	3.17573	2.84562	2.73053	2.90925	2.93253	3.42645	2.717	4.40151	2.96395	5.33459	2.79195	5.61206	4.28278	3.78164	6.4652	2.44438	3.47233	4.82766	4.69315	3.1566	5.23576	3.76037	2.99217	3.51747	3.3182	4.40728	2.56454	2.49316	4.94082	3.45212	5.21382
GSE14520_GSM363176	4.967	3.28519	2.88675	2.70904	2.85397	2.93619	3.05043	3.08623	3.14068	2.64216	3.81547	2.82909	5.79574	2.61977	5.99695	4.14025	3.74154	7.77228	2.76626	3.0893	3.48287	4.90401	3.03927	5.16294	3.78631	3.16924	3.60036	3.05343	5.39953	2.50923	2.41455	3.15539	3.36185	5.84024
GSE14520_GSM363180	2.75384	3.42625	3.08768	3.46459	2.5273	2.8193	2.78299	2.70525	3.05977	2.73974	4.1461	3.17577	5.22037	2.80218	6.02153	3.9715	5.23623	3.70899	2.63208	2.8766	5.01073	4.93126	3.05543	5.22789	4.06965	3.24045	3.96374	3.21538	4.76445	2.43007	2.38872	4.2776	4.09826	5.1154
GSE14520_GSM363182	3.66857	3.16149	2.65554	3.14157	2.88276	2.69988	2.75868	2.92429	3.368	2.67308	2.95644	3.08781	4.37911	2.53242	6.71849	3.92784	4.00765	3.97722	2.17664	2.98821	3.04899	3.99816	2.86768	3.24184	3.45345	3.03811	3.54668	2.74978	3.01598	2.93293	2.49981	3.958	3.13716	5.0852
GSE14520_GSM363186	3.144	2.47506	3.03529	3.10841	2.84877	3.10638	2.67292	2.92825	3.51414	2.62501	3.93488	2.91236	5.56789	2.82919	6.70262	5.88202	3.14769	5.77692	2.64676	3.07406	3.49769	4.21218	3.03955	4.42653	3.19015	2.84872	3.43003	2.96492	4.44786	2.48018	2.48724	3.04707	3.08952	5.3747
GSE14520_GSM363188	4.43487	2.87244	2.89088	2.88478	2.96833	3.65801	2.99661	2.66592	3.38279	2.63952	3.9306	2.91902	5.11576	2.50036	6.66772	5.01829	3.38787	5.3036	2.46348	2.65262	3.08639	4.53507	2.75023	5.05937	3.35142	3.19989	3.55567	3.291	5.05075	2.69876	2.54026	3.14357	3.4163	5.86811
GSE14520_GSM363196	6.2259	3.45765	2.82287	2.98076	2.83685	3.11229	3.09975	2.43389	2.88756	2.635	4.48686	2.99225	5.57696	2.70496	7.13747	5.55557	4.24864	4.30203	2.803	2.83814	5.17498	4.53643	3.35356	6.77264	4.31819	3.48622	3.71559	2.84027	8.96487	2.48018	2.54803	3.45666	3.22124	4.86361
GSE14520_GSM363198	3.48196	3.47356	2.82544	2.65215	2.85213	2.63423	2.9198	2.95902	3.52007	2.83831	3.43961	3.59165	5.22977	2.76415	5.65581	5.60552	3.91024	5.06801	2.43736	2.74353	4.14925	4.31466	2.88342	4.49151	3.41847	2.82118	3.29554	2.73759	4.07778	2.03596	2.63719	3.23548	3.85458	4.34889
GSE14520_GSM363200	2.88072	3.99541	2.98086	2.21408	2.94129	3.47403	3.60621	2.64427	3.4504	2.62811	3.4231	3.227	5.6369	2.58825	6.5422	5.5381	3.56003	7.18378	2.07718	2.62373	3.62648	4.95601	2.77559	4.82761	3.16462	3.37265	4.14798	2.74753	4.58199	2.36986	2.57136	3.84905	3.82813	5.49808
GSE14520_GSM363202	2.89902	2.90925	2.89558	2.77161	3.10817	2.91576	2.81285	2.36907	4.07924	2.69367	3.65006	3.11835	4.6848	2.80899	7.5271	3.92166	3.7608	5.44255	2.47008	2.83073	3.81685	4.45313	2.64061	4.41841	3.64266	2.68741	3.36879	3.01505	4.0302	2.74213	2.55113	3.85389	3.09619	4.41293
GSE14520_GSM363204	3.01959	3.1585	2.77039	2.80147	3.02956	2.56761	2.79005	2.60882	2.96502	2.70772	3.45919	3.35021	5.06239	2.52644	6.15034	4.32594	4.02729	6.86466	2.71629	2.04337	2.92461	4.44781	2.81693	3.63366	5.34119	3.3354	3.98248	2.87075	3.93776	2.46424	2.43407	4.37001	3.70218	5.53238
GSE14520_GSM363205	3.24757	3.28206	3.45656	3.87649	3.12917	2.4255	3.22829	3.07019	3.27225	2.65787	4.56093	2.87807	5.02728	2.54273	5.79263	4.82048	3.8318	4.28194	2.52992	3.43696	3.636	4.53144	2.87764	5.22882	3.12562	2.85336	3.42708	2.80239	4.4635	2.80537	2.45038	4.30246	3.74234	5.64799
GSE14520_GSM363209	2.33654	3.5095	3.35668	3.27635	2.95439	2.92085	3.45605	2.99744	3.58733	2.68919	4.28615	2.96341	5.50085	2.5749	5.36103	3.84669	4.58488	4.92531	2.58576	2.52046	4.69326	5.35998	3.15679	7.06939	4.15852	2.945	3.97263	2.93213	5.21683	2.72334	2.43476	3.65406	4.09139	6.13314
GSE14520_GSM363213	3.63622	3.34489	2.58982	2.97267	2.86457	2.16433	3.12899	3.406	3.4822	2.59911	3.27191	3.41893	4.78215	2.81446	5.51943	5.07187	4.17809	4.75482	2.41375	2.27626	3.42538	3.71422	2.77203	3.41369	3.4106	3.45614	3.58993	2.5771	3.09143	2.41543	2.62259	4.19573	3.70875	4.37302
GSE14520_GSM363215	5.3609	3.23122	3.05697	3.2313	2.76297	2.51605	3.01941	2.73834	3.01384	2.63493	3.82579	2.75397	5.07124	2.73865	6.95234	4.25153	4.37567	4.1475	2.423	3.2054	3.26587	4.73912	2.92174	4.73067	3.96845	3.03848	3.76117	2.79318	3.94841	2.85667	2.41611	3.1374	4.05112	5.43269
GSE14520_GSM363220	3.27606	3.68328	3.07141	2.93939	3.08638	2.58197	3.26175	2.62564	3.23827	2.64487	3.69899	3.58188	6.13378	2.72334	6.19341	4.96437	3.91146	3.76789	2.56833	2.4244	4.6413	4.94141	2.77919	4.82566	3.51849	3.07173	3.35864	2.69771	5.18476	2.48091	2.41512	3.50366	3.55484	5.00858
GSE14520_GSM363224	3.21111	3.05286	2.84949	2.84587	2.69656	2.39138	3.06677	2.77362	3.01208	2.52299	3.11133	3.75076	4.48817	2.86338	6.42556	4.02242	3.95072	5.37795	2.6703	2.72655	3.73388	3.95309	2.95517	3.26839	3.88599	2.82733	3.38717	2.80148	3.53848	3.07784	2.50315	3.15292	3.18927	5.07839
GSE14520_GSM363230	3.65864	2.36476	2.43134	2.90294	2.51935	2.45228	2.91163	3.02591	3.90256	2.64983	3.19906	3.5607	4.9261	2.55064	5.65287	5.2592	4.23081	6.93154	3.18319	2.75787	3.33625	3.7948	3.05914	2.83857	3.65514	2.81671	3.23394	2.63158	3.57396	2.25767	2.5272	3.22648	2.95024	4.64308
GSE14520_GSM363239	2.6369	2.99008	2.67464	2.98452	2.90837	2.35768	2.86592	3.44114	3.25996	2.64779	3.77107	1.98031	5.7661	2.59908	5.7518	4.57371	5.05498	6.78327	2.36985	2.50108	3.68781	3.76741	3.33839	3.52138	4.3219	3.62404	3.31234	2.63227	5.77834	2.94083	2.53551	3.5694	3.07538	5.66155
GSE14520_GSM363241	2.77065	3.21903	2.96017	3.20009	2.94259	2.30975	2.91461	3.20092	3.31708	2.77331	3.24876	3.05578	4.71014	2.64293	6.67152	4.1738	3.02067	4.6935	2.32442	3.40142	3.75362	4.43702	2.97895	4.66496	3.84762	2.81242	3.57273	2.69795	3.87959	2.29845	2.39966	3.12533	3.29286	4.55015
GSE14520_GSM363243	3.28538	3.37716	3.13268	3.12558	2.74905	2.36598	2.71416	2.93742	3.27077	2.54096	4.41817	2.79927	5.96172	2.63211	6.13863	5.26886	3.77027	5.21503	2.50176	3.40848	4.02426	5.03984	3.27785	5.48534	3.35733	2.97899	3.06246	2.73217	4.62097	2.90189	2.52948	3.32581	3.18927	4.57014
GSE14520_GSM363251	3.00296	3.10727	2.43915	3.24751	2.96578	2.92752	2.38174	2.98218	3.10372	2.69465	3.2047	2.81701	4.61646	2.66958	6.85389	4.38791	4.36184	4.44453	2.4371	3.01672	3.00576	5.44343	2.69121	3.25648	3.48304	2.76746	3.21927	2.70655	4.43346	2.68988	2.46322	3.36261	3.37725	6.07254
GSE14520_GSM363264	2.65808	2.79125	2.79109	3.02521	2.90477	2.10364	3.17637	4.28132	3.43114	2.7365	2.89066	3.4453	5.22007	2.59978	5.88891	7.42575	4.30517	3.79641	2.82587	2.52331	3.76465	4.67102	2.92809	3.81503	3.3044	3.70534	3.44294	2.6897	7.4338	2.77674	2.47479	3.12878	3.76448	5.10198
GSE14520_GSM363265	3.1958	3.38759	2.78773	4.12694	2.95026	2.67313	2.34969	3.12252	2.95046	2.67025	3.61689	2.61311	4.90484	2.74603	6.56403	4.69829	4.10578	6.44041	2.67071	3.05083	4.70741	5.89313	3.09489	6.06316	4.52381	2.9806	3.44358	2.89404	5.29004	2.12759	2.46393	3.26622	3.7353	5.0874
GSE14520_GSM363266	3.79081	2.3098	2.24816	2.87996	2.79826	3.37819	3.04788	2.83782	3.74757	2.74571	3.00404	2.80846	5.0813	2.47122	7.32682	5.9513	4.41172	5.56788	2.54962	2.99775	4.3791	4.43923	2.73099	3.45851	3.21864	2.94834	3.03543	3.16621	3.84995	2.6368	2.44292	3.14762	2.91045	5.09181
GSE14520_GSM363269	2.86665	3.34698	2.7527	2.76905	2.50306	2.6209	3.53902	3.20777	3.6281	2.68685	2.89444	3.41739	4.40388	2.89269	5.712	6.00783	4.50546	5.96106	2.64897	2.79208	3.29135	3.62062	3.08935	3.21172	3.33142	3.45401	3.5675	2.55959	3.04293	2.93363	2.39557	3.17843	3.11643	4.23885
GSE14520_GSM363270	2.72427	2.6575	2.6547	2.87981	2.8449	2.69409	2.42838	2.72907	3.18137	2.72431	3.52706	3.12665	4.95315	2.69794	6.94612	5.69889	3.63451	6.30928	2.1735	3.06898	3.28715	3.96581	3.05881	3.51251	3.48648	2.38449	3.52789	2.65966	4.05119	2.63651	2.50266	3.08899	3.06412	4.70082
GSE14520_GSM363272	2.85125	2.5538	3.00582	3.24094	3.20526	2.92714	2.75042	3.30125	3.6037	2.61272	3.03491	2.94758	5.31414	2.55255	7.99339	5.02713	3.74733	6.99307	2.47028	2.69266	3.33119	4.53535	2.93239	4.31029	3.24624	3.13598	3.4843	2.82434	5.01403	2.69707	2.63615	3.16562	3.49832	5.22772
GSE14520_GSM363273	3.37801	2.62616	2.68079	3.21322	2.78882	2.65542	2.9689	2.5249	3.17012	2.80009	2.92373	3.46386	4.98402	2.57633	6.25939	5.87093	4.13265	4.28771	2.68741	3.5961	3.75158	4.74723	2.80765	4.4271	3.37913	2.79563	3.6594	3.06677	4.17581	2.25723	2.47225	3.08764	3.23951	4.92328
GSE14520_GSM363275	3.10964	2.73682	3.36598	3.30778	2.68842	2.74152	3.95964	2.86719	3.93313	2.88415	3.51202	4.38278	5.62164	2.46034	5.69841	5.05858	4.01112	5.99198	2.41937	4.08143	6.17431	4.85328	2.94884	5.01163	4.05852	3.15923	3.75437	4.80041	5.56865	2.65593	2.53716	3.02099	2.70808	4.48398
GSE14520_GSM363288	2.968	2.75009	2.78944	3.25731	2.74314	2.45137	2.71848	2.94374	3.20748	2.63994	3.31873	2.70944	4.80506	2.80613	5.85083	5.95443	4.10134	3.49405	2.35467	2.67303	3.71281	4.65889	2.74736	4.85764	4.15176	3.16899	3.66149	2.8131	4.96515	2.56208	2.32147	4.16977	3.64149	4.93199
GSE14520_GSM363291	2.94556	3.44385	3.21787	3.72882	3.27707	2.80844	3.7768	2.66108	3.49562	2.97011	4.04287	2.67605	5.29244	2.49427	6.83256	4.75582	3.97099	4.59408	2.31326	3.02967	4.542	5.11718	3.09393	5.75243	3.32716	3.37242	3.48515	2.76639	4.87897	2.42869	2.6302	3.30278	3.52078	5.98741
GSE14520_GSM363293	3.07593	3.10708	2.6717	3.60838	2.91578	2.38322	3.09252	3.47103	3.11583	2.72664	3.72398	2.87836	5.11887	2.83415	6.94582	3.60244	4.40021	7.64476	2.77585	3.09521	3.00605	4.97955	3.13912	4.60247	3.53297	2.61399	3.23382	2.65205	4.47356	2.85192	2.55636	3.09421	4.00693	5.49725
GSE14520_GSM363294	4.11827	2.85532	2.58215	3.01993	2.90427	2.71531	2.7071	2.88665	3.03839	2.685	3.78023	2.64669	5.65349	2.77737	6.25171	5.15676	3.39193	5.33904	2.75908	3.08087	3.11779	5.71948	3.02119	5.14762	3.98891	3.18173	3.68309	2.68779	4.74437	2.54787	2.51044	3.0908	4.33142	6.3155
GSE14520_GSM363295	3.12846	4.18481	3.15613	2.63778	2.90725	2.07337	2.94516	3.09385	3.85976	2.72171	2.84874	3.96353	5.04775	2.38411	5.95173	4.70789	3.94151	4.93359	2.55421	3.26945	3.67081	4.80811	2.98066	3.87594	3.58625	2.87808	3.54269	2.87618	4.05119	2.58309	2.33345	3.04901	3.54183	5.39275
GSE14520_GSM363298	3.33653	3.11616	3.07602	3.60906	2.81753	2.60879	2.38736	3.26858	2.89048	2.73824	3.85552	2.99301	5.08885	2.66429	6.89024	5.86173	4.62343	3.64025	2.15632	2.93357	5.53082	6.71274	2.98367	6.56053	5.04277	3.64322	3.53454	3.17713	5.43591	2.26216	2.43636	3.44383	4.01644	6.1047
GSE14520_GSM363309	2.84504	3.16623	3.58709	4.04052	3.09469	2.67869	2.73383	3.44052	3.21939	2.68896	4.27876	2.7515	5.30678	2.51837	6.30241	4.33322	4.95237	4.58487	2.37646	2.90002	4.54387	4.833	3.32029	4.58572	3.38645	3.4276	3.30162	2.63736	4.47081	2.53139	2.43721	3.3801	3.59156	5.12843
GSE14520_GSM363311	5.62345	3.601	2.52334	3.12032	2.77892	2.47307	3.20734	3.64323	3.5158	2.65222	3.48555	3.00636	5.07443	2.63577	5.72263	4.74503	4.73417	6.01366	1.84497	2.74865	3.35867	5.57385	2.90863	3.44744	3.74442	2.72624	3.85602	2.75593	4.14682	2.24435	2.5599	3.82151	3.90822	5.47375
GSE14520_GSM363312	3.08383	4.62115	2.24961	2.98266	2.98371	2.13408	3.14018	2.72882	3.23877	2.58833	2.8196	2.94642	5.53307	2.55084	6.07273	3.52568	4.36522	3.74565	2.74817	2.62223	4.13261	6.12123	3.36516	3.70792	3.55471	3.07056	3.48073	2.50083	3.58665	2.56231	2.47511	3.47738	3.14968	3.90345
GSE14520_GSM363314	3.2999	3.47086	3.4414	4.34553	3.31513	2.48733	3.05307	2.95993	3.27737	2.65476	5.91163	3.21114	6.34045	2.51761	6.44023	5.74374	3.84477	5.20714	2.46019	3.24152	5.64355	4.72933	3.47976	6.49711	2.99071	3.18763	3.31014	2.96391	5.14254	2.9906	2.4741	3.72467	3.86458	6.01275
GSE14520_GSM363315	3.04065	3.52343	2.65095	3.61069	3.04845	2.11525	2.87219	3.26858	3.28648	2.6687	3.48147	2.76179	4.97849	2.53129	6.73316	5.50982	3.60778	4.63494	2.57278	3.02387	3.22389	4.0228	3.15399	4.31905	3.73834	3.08789	3.18469	2.59406	4.23277	3.21404	2.5985	4.92427	3.68796	5.9859
GSE14520_GSM363316	4.61703	3.11388	2.3043	3.14819	2.98292	2.20474	2.72262	3.11003	3.16805	2.667	3.2175	3.74629	4.47188	2.41656	4.91683	5.12987	3.89154	4.89228	2.49242	2.65107	2.69434	3.80736	2.88113	3.71876	4.5483	4.11005	3.58839	2.69454	3.87283	2.96503	2.44058	3.4967	3.30667	4.99445
GSE14520_GSM363326	3.57081	3.23939	3.7008	3.69621	2.95927	2.62912	2.94662	2.82624	3.01852	2.70227	4.01809	2.65561	5.59587	2.58934	6.83947	5.51194	4.81062	4.11436	2.21064	3.53397	5.05406	5.22172	3.23895	5.77687	3.3181	3.09297	3.7203	4.20742	5.0131	2.50437	2.48868	4.11146	3.71884	5.2291
GSE14520_GSM363327	3.53695	2.7777	2.78944	2.97581	2.82787	3.08457	2.94436	2.90688	3.4435	2.59099	3.12827	3.72875	4.93491	2.73149	7.8335	4.98868	4.30619	3.09461	1.802	2.83034	3.18243	4.47392	3.30763	3.91217	3.93017	3.07587	3.39049	2.65893	4.81142	2.40736	2.62309	3.2816	3.54799	4.93447
GSE14520_GSM363332	3.32811	2.7008	2.6391	3.19803	2.68663	2.40906	2.68975	2.86911	3.49562	2.63715	3.44511	3.94261	4.93862	2.8209	5.89648	5.39395	3.55835	3.52128	2.39347	3.46408	3.10038	4.36496	3.06146	3.94222	3.51849	2.96627	3.30143	2.40542	4.29199	2.81913	2.70917	4.68133	3.53842	5.46467
GSE14520_GSM363333	3.86722	3.3984	2.98955	2.92078	2.56638	3.03134	2.57974	2.7898	3.14068	2.62948	3.3873	2.98776	4.80268	2.24825	5.32415	5.41669	3.94596	4.15618	2.33352	2.86318	3.76081	6.0379	3.52388	3.94515	3.80288	2.32967	4.1984	2.49195	4.65434	2.78354	2.51765	4.75674	3.88594	5.92531
GSE14520_GSM363335	3.66155	2.73197	3.32642	2.84774	2.56137	2.73053	3.04676	2.85323	3.36555	2.70557	3.18664	2.61119	4.83596	2.49484	7.15502	4.53862	3.42636	5.68915	2.70166	3.21062	3.53998	3.91891	3.44623	4.83461	2.84764	2.89587	3.2531	3.02378	4.34721	2.46014	2.55952	3.05036	2.86293	5.86103
GSE14520_GSM363336	3.46659	3.36923	2.92369	3.05935	3.0975	2.64351	3.29666	3.40688	3.34048	2.63591	3.3351	3.44568	5.18418	2.78694	3.91993	4.40252	4.69348	5.96732	2.42705	3.24241	4.19706	4.33497	2.97414	4.13622	3.22538	3.20982	4.18842	2.54773	4.05047	2.58931	2.57634	3.33895	3.91532	5.94766
GSE14520_GSM363337	2.99009	2.80568	2.67398	2.89889	3.00816	2.91055	2.55596	2.91052	3.07904	2.62779	3.55583	2.03682	4.8495	2.53382	6.52152	4.7962	3.93663	4.51742	2.58556	2.61012	3.04544	7.28115	2.8836	4.24887	3.85376	3.22135	3.49285	2.63915	4.19864	2.56014	2.39083	4.88818	3.84096	6.73767
GSE14520_GSM363343	8.24464	3.11738	2.62457	3.23325	2.92264	3.35895	2.83505	2.88949	3.21229	2.66965	3.80582	3.3891	4.73782	2.61757	5.56267	5.74255	3.85195	3.24288	2.40516	2.81472	4.23024	4.82484	2.76495	5.39847	4.63355	3.00381	3.373	2.99914	4.84805	2.3908	2.58825	4.51806	3.16467	5.07695
GSE14520_GSM363344	3.46354	2.51775	2.24543	3.11271	2.57457	2.89115	2.90501	2.58882	3.23448	2.68324	3.31092	3.12039	4.84865	2.7543	6.27267	4.94739	3.53178	4.93501	2.63242	2.69943	3.68433	3.54269	3.03415	3.25797	4.6173	3.32729	3.48926	2.78448	5.65566	2.44995	2.55069	3.70917	3.16618	5.46329
GSE14520_GSM363352	3.43752	2.44718	2.88864	2.69015	2.61198	3.03976	2.27447	2.98516	2.95283	2.52321	5.96969	2.23084	6.40868	2.26037	5.93165	4.15794	4.4288	6.4819	3.105	3.71326	4.20975	6.30603	3.52425	6.75369	3.94765	3.09132	3.37587	2.58563	6.76511	2.4993	2.42604	3.20105	4.09758	5.93496
GSE14520_GSM363360	3.14398	3.01518	2.21783	3.02339	2.21947	3.07513	2.20452	2.59354	2.88671	2.57982	3.31905	2.24292	4.52639	2.8886	7.19069	4.3963	4.57902	3.66607	2.60582	3.24175	3.21172	4.27559	2.57624	3.60314	4.2585	2.5931	3.32707	2.90631	4.00059	2.15598	2.49475	4.19513	3.6456	5.12023
GSE14520_GSM363362	3.11785	2.62159	2.44197	2.95967	2.58192	2.79684	2.64746	2.98443	3.26715	2.7965	3.34193	2.79618	4.41686	2.71251	9.76417	4.61559	3.84947	5.63289	2.20052	2.89142	3.4581	3.80938	2.90612	4.10535	3.74388	2.75028	3.64624	2.89954	3.60145	2.57042	2.56896	4.71362	3.26261	5.58783
GSE14520_GSM363364	3.17259	2.66974	2.94793	3.28019	2.60712	2.7964	2.87166	2.6313	3.17773	2.74792	4.12041	3.15904	5.13565	2.98584	5.67781	3.66607	4.00289	3.207	2.68177	3.09567	4.48459	4.36336	3.12377	5.63624	3.47912	2.90559	3.68474	3.38274	4.56963	2.24147	2.3133	3.55245	3.48969	6.18385
GSE14520_GSM363366	2.75856	2.83049	2.40963	3.17798	3.1641	2.84528	3.02474	2.77881	3.21019	2.69807	3.30455	3.84775	4.93572	2.72282	6.83824	5.68025	4.0837	3.92411	2.84279	3.1755	3.27885	4.816	3.13802	4.14273	3.19365	3.46573	3.49397	3.11228	4.12215	2.46889	2.56738	4.49048	3.12593	4.38478
GSE14520_GSM363371	3.39914	2.55534	2.33116	3.4221	2.93382	3.05873	2.97321	2.73229	3.17652	2.77936	4.47537	3.78996	4.93547	3.03305	6.12819	5.94022	3.80338	4.56161	3.06917	3.48055	4.47776	4.57594	3.04461	4.81928	3.29872	2.75216	4.5388	3.58789	4.34055	2.5867	2.6228	3.46686	3.33161	4.43939
GSE14520_GSM363378	3.3086	3.49101	2.82045	2.75303	2.87722	4.11243	2.67268	3.89032	3.7481	2.99109	2.95492	3.68326	4.77226	2.64786	7.51422	4.72428	3.93756	3.22411	2.96912	2.85602	3.89109	3.86537	3.00798	4.88281	2.34995	4.19118	4.24669	3.49053	4.25616	2.5406	2.68626	6.01973	2.90907	5.33864
GSE14520_GSM363386	3.11974	2.51775	2.54948	2.74432	2.91131	2.68225	2.45011	3.11526	3.25101	2.68445	3.94074	2.11968	4.52035	2.60686	6.70701	4.70723	3.98066	5.0878	3.08066	3.15724	3.26263	4.42818	2.79616	4.40401	3.573	3.3325	3.76686	2.83549	4.48733	2.53065	2.44292	4.50374	3.60548	5.85944
GSE14520_GSM363388	3.28171	4.16056	3.93562	6.71106	3.09715	3.96839	2.86246	3.40744	3.26845	2.80935	8.16628	3.44568	7.02021	2.94017	7.05413	5.70282	5.16915	3.178	2.66703	3.83702	8.3363	7.50771	3.68779	7.69559	3.69928	3.3009	4.18928	2.82291	7.32897	2.63293	2.4515	3.88617	3.99453	5.46957
GSE14520_GSM363391	3.50607	2.60288	2.52703	3.08581	2.91882	3.17321	2.54243	2.0873	3.34378	2.65959	3.48512	2.37023	4.84891	2.61068	7.57426	4.81715	3.03701	6.10828	2.66905	2.69622	3.65724	4.28226	2.89489	4.40654	3.28189	3.08369	3.6066	2.93188	7.16827	2.58007	2.59167	3.22828	3.45103	4.43391
GSE14520_GSM363393	3.54217	2.75564	2.40481	3.01335	2.4993	3.21017	2.64026	1.91971	2.96656	2.83778	3.9818	1.63858	5.20436	3.43804	6.35335	3.10325	4.37725	3.64135	2.43417	3.05385	3.11985	6.08343	3.06703	5.41519	4.39595	2.66236	6.99293	3.16405	5.88972	2.33135	2.46387	3.1186	8.99868	5.96418
GSE14520_GSM363404	3.22214	2.94388	2.38164	2.72107	2.62729	2.97386	2.9757	3.4317	3.14644	2.703	3.1145	2.75832	4.64974	3.02824	6.13947	3.39399	3.94876	7.37964	3.04389	2.32589	3.96844	4.194	2.72975	2.96344	3.5938	2.89587	3.60806	3.09399	4.46516	2.87028	2.37711	3.84976	3.115	4.62514
GSE36376_GSM890321	2.50755	2.73875	1.85952	2.50936	3.08516	3.35616	2.82795	2.99874	3.22769	2.52511	3.15734	2.86076	5.92584	2.86445	6.60889	4.72149	3.84023	5.47944	2.23156	3.42958	3.41168	5.62982	2.79478	3.1718	4.53377	2.58533	4.13556	2.74357	4.23594	2.86504	2.30652	2.84077	3.1503	6.36751
GSE36376_GSM890327	3.30504	2.55177	2.13663	2.48027	3.72631	2.66606	3.08283	2.80362	2.87241	2.63925	3.98536	2.99772	5.32741	2.43485	7.47872	4.98651	4.94964	4.4729	2.71916	2.40537	3.24427	4.32423	4.01483	3.32735	3.70273	3.05161	3.38427	2.76295	4.72514	2.58944	2.53714	3.21344	3.36222	5.25188
GSE36376_GSM890329	4.33142	3.96096	2.89283	4.34923	3.8699	2.97702	4.79455	3.43532	3.48693	2.73456	4.46312	3.66116	5.77299	2.94841	4.64323	4.93167	5.14816	5.47403	2.7934	3.2234	6.59235	6.9713	3.82146	4.48596	4.44798	3.34653	4.74467	2.54162	6.19335	2.6573	2.56665	3.31832	3.88642	5.22234
GSE36376_GSM890331	3.45586	2.35723	2.00774	2.79685	2.90911	2.45669	2.89954	1.91578	3.31327	2.60161	3.97873	2.65647	4.90906	2.72305	6.13786	4.87666	3.26753	3.31897	2.43475	3.06058	3.01801	4.97529	3.29315	3.47985	3.53808	3.11014	4.342	2.96949	4.80974	2.69774	2.62562	3.45691	4.04809	4.06528
GSE36376_GSM890332	3.68182	2.9569	3.3005	3.63277	3.58811	2.6709	3.01974	2.9313	4.61322	2.68757	3.66409	2.29229	5.81032	2.12071	7.36708	4.55871	4.3184	6.92923	3.21243	2.88948	3.00277	4.09253	3.15609	3.07804	3.60659	3.37578	4.77134	2.64941	2.47955	2.78234	2.42572	4.7771	5.05154	4.28287
GSE36376_GSM890333	3.41617	2.50924	2.88065	2.30403	2.82399	2.48393	2.13215	2.91638	3.18131	2.70747	3.9394	3.30357	5.05685	2.28886	6.76835	3.68607	3.35152	3.36263	2.77338	2.57149	3.43696	4.92352	3.25089	4.53114	3.60487	2.84853	3.15225	2.96308	4.03327	2.85582	2.49818	3.69106	2.8525	5.36425
GSE36376_GSM890335	2.73288	3.12578	2.9775	2.76153	2.61068	2.87805	3.34519	2.52247	3.49697	2.77427	2.77529	2.14381	6.12359	2.65729	5.36436	4.37893	3.13597	3.33862	2.90515	2.65287	3.73621	4.98785	2.88316	3.70277	4.88785	2.65697	3.30748	2.58169	6.11307	2.59375	2.46765	4.26476	3.74108	4.09652
GSE36376_GSM890336	3.13103	3.37171	3.74696	2.66071	2.93337	2.86454	3.27284	3.48355	3.42842	2.67607	3.2149	3.06449	6.06121	2.20876	6.60034	6.28207	3.58517	5.87499	2.5502	3.05617	4.2889	4.2735	2.67416	4.32294	3.1327	2.68442	3.11461	2.74505	4.22685	2.68961	2.55758	3.32937	4.11507	5.59042
GSE36376_GSM890337	3.19854	2.7344	2.48021	2.98662	3.11271	3.19809	3.29069	3.34562	3.51799	2.79042	3.14738	9.07708	6.02308	2.45754	6.16072	4.01187	4.32375	3.4423	2.70278	2.71836	3.0878	3.73801	3.10434	2.88745	3.68786	2.89591	3.99234	2.3726	3.77408	2.44573	2.48659	4.00518	3.42251	6.37847
GSE36376_GSM890340	2.92903	2.85609	1.87496	3.06719	3.16304	2.78581	3.36116	3.45139	4.29052	2.89468	3.7186	2.94815	5.50008	2.8584	6.89512	6.66713	5.75138	2.70304	2.68006	2.61294	3.92065	4.69938	3.6067	3.42065	3.38856	3.11086	4.42646	2.72384	5.27531	2.37827	2.15482	3.62493	3.84291	5.20762
GSE36376_GSM890342	3.13008	3.47028	2.67509	3.89586	2.69122	2.63828	2.5741	3.2126	3.6623	2.62539	3.6718	3.25084	5.16594	2.96576	6.03224	4.91831	3.75039	3.55605	2.95651	2.87735	5.18789	5.3422	3.16627	6.0274	4.11759	3.34612	3.91755	3.4028	5.34489	2.43957	2.44955	3.11275	3.29927	4.84671
GSE36376_GSM890343	3.08425	3.54814	2.69413	3.04758	2.65921	3.03368	3.47774	3.07674	3.55484	2.55585	4.6002	3.64086	5.20984	2.35153	6.38241	4.3189	3.81545	4.33917	2.42205	3.19129	5.47844	5.98615	3.06246	6.46139	4.10025	2.99703	3.63966	3.98989	6.52126	2.64677	2.4825	3.83322	3.34824	5.05037
GSE36376_GSM890345	3.07393	3.23272	2.85914	2.96015	2.613	2.95804	3.55123	2.47702	2.91457	2.58642	3.2164	2.98307	4.4467	3.14816	7.12362	3.82482	2.99299	5.51515	2.5801	2.84489	3.60261	4.66221	2.89596	4.33167	3.21042	2.60578	3.08282	2.80547	4.0012	2.66949	2.64427	3.69272	3.53401	4.38101
GSE36376_GSM890348	3.38612	2.59961	2.42736	2.9469	3.33321	3.44798	2.80848	1.78373	3.30239	2.84603	3.55047	2.89876	5.43081	2.45996	6.5629	5.64837	4.02133	5.03408	3.12874	2.71015	3.43527	4.86419	3.28619	3.32087	3.58853	3.39868	3.48809	2.44044	4.84781	2.52853	2.61167	4.88212	3.36529	4.84329
GSE36376_GSM890351	3.22951	2.78897	2.9703	2.85416	2.91382	2.69234	3.3332	3.24219	3.41132	2.62164	3.65462	2.47323	5.70045	2.79864	6.04934	4.57149	3.76813	4.27465	2.64087	2.41263	3.21704	5.62162	3.2426	2.97013	3.23896	2.89345	3.14393	2.6046	5.75482	2.1026	2.55398	3.42482	3.32521	5.16836
GSE36376_GSM890354	4.89145	3.348	3.10357	3.4025	2.85484	2.90411	3.77211	2.93872	3.36795	2.64654	5.02294	2.71678	5.09338	2.75476	6.93003	5.60596	3.69979	3.45081	2.14054	2.5852	5.88385	5.54337	3.68207	7.43269	4.44777	4.63966	3.51467	2.58775	6.41887	2.67358	2.65483	3.57686	4.12492	5.50554
GSE36376_GSM890357	3.22492	2.62665	2.49464	2.70339	3.67557	2.3385	2.6095	2.96203	4.67728	2.68229	3.34083	2.58322	5.43081	2.75999	5.84875	6.32353	4.27023	6.47936	2.32485	2.61294	3.38878	4.26088	3.66252	3.22744	3.61174	3.0721	3.87401	2.43297	3.77712	2.69028	2.37279	3.12907	2.47005	3.87943
GSE36376_GSM890359	3.19141	2.76404	2.48948	3.11489	2.77255	3.20147	2.29902	3.01365	3.65352	2.75493	3.32536	2.58146	6.07364	2.27121	7.1473	8.13473	4.31471	4.20495	2.80497	3.02687	3.09004	4.12172	3.4829	2.78347	4.09077	2.99985	4.40881	2.54814	6.12679	2.84954	2.42558	3.21363	3.30615	6.51758
GSE36376_GSM890360	4.1522	2.53288	3.15782	3.1441	3.13898	2.48393	2.8624	2.38726	2.91135	2.60354	3.2498	2.71992	5.10896	2.6823	5.80282	5.10397	3.07239	3.89816	2.15438	2.90434	3.17121	4.83367	2.87919	4.65572	3.37047	2.96511	3.48706	3.30883	4.65666	2.66971	2.52391	3.14283	3.706	4.59975
GSE36376_GSM890365	3.22987	2.64445	2.82803	4.04766	3.22173	2.62568	2.85015	1.73253	3.76992	2.83094	2.91476	3.0699	5.80428	2.40359	6.15374	5.03874	3.59562	3.13618	2.51776	3.24196	2.84368	3.97159	3.11571	3.06754	3.633	2.66473	3.57092	2.62305	2.71551	2.57763	2.50612	3.4814	4.13368	4.39694
GSE36376_GSM890368	3.28818	2.65744	2.73252	2.58614	3.12553	3.03567	3.23465	2.6813	2.859	2.66695	3.85701	2.54014	4.92909	2.98241	5.91066	5.52735	4.19258	5.64253	2.57296	2.87956	3.31169	5.41974	3.10821	4.59042	4.57641	2.52636	3.61555	2.52751	4.81848	2.95064	2.68015	4.14735	3.47619	6.0067
GSE36376_GSM890369	3.18594	2.43776	2.54945	2.90641	3.31246	2.63216	2.9882	2.87784	2.86559	2.9587	2.86134	2.90379	5.1715	2.5305	4.43458	4.23694	4.05118	2.59089	2.47004	2.26767	3.10728	4.15279	3.18803	3.32289	3.07989	2.78938	3.39726	2.50007	2.91958	1.99196	2.7459	3.81125	3.27693	3.86587
GSE36376_GSM890370	6.39982	2.7629	3.03312	3.388	2.41294	2.72763	2.94699	3.1945	3.42731	2.45472	3.12915	2.71236	5.27713	2.17836	6.21542	5.30184	3.99266	4.79238	2.80088	3.30456	2.86682	3.84151	2.50678	4.02584	3.54453	2.61694	3.24431	2.57212	3.14236	2.02325	2.64906	3.23046	1.94447	4.78262
GSE36376_GSM890372	3.76055	2.60873	2.69938	2.70103	2.89415	2.91362	2.33577	2.50158	3.6045	2.45818	3.00092	1.91105	5.06175	2.20632	5.84627	5.62505	3.45245	4.39251	2.67545	2.8599	3.0503	4.3088	3.18724	2.92247	3.56344	2.31998	3.33406	2.85427	3.63923	2.69774	2.48922	3.74222	3.60068	5.00293
GSE36376_GSM890373	3.39486	2.88492	2.85474	3.11203	3.12895	3.01117	2.97549	2.81492	3.90556	2.71495	3.37093	2.96546	5.03087	2.39447	6.02952	3.87642	3.9223	4.50476	2.21845	3.35386	3.52709	5.07028	2.64887	3.73321	4.04931	2.7072	5.86086	2.78869	6.26984	2.47946	2.43563	3.72765	3.79232	4.76816
GSE36376_GSM890374	5.91752	3.58219	2.61216	4.10294	3.77093	3.06209	3.09521	2.71915	2.89918	2.66469	4.1056	3.15682	5.80428	2.83526	5.81898	4.64629	5.66582	8.06465	3.01758	2.84294	4.53213	4.73032	2.95489	3.48634	4.93692	2.66027	3.29137	2.78827	4.57597	2.79722	2.52089	3.43079	2.8915	5.5427
GSE36376_GSM890376	4.55879	3.22823	2.95415	3.51249	2.54117	2.50477	3.53811	3.29201	3.65172	2.85129	4.00282	4.54024	5.34963	3.05604	6.76156	4.09692	4.32316	3.36591	2.6497	3.23226	6.346	4.71303	2.75079	4.86873	3.70355	2.13221	3.25479	3.24801	4.9624	2.57952	2.47984	3.25168	3.35103	5.39216
GSE36376_GSM890377	5.06604	2.47662	3.03345	2.70547	3.42223	2.76456	3.19297	3.02019	3.37767	2.98328	3.49005	2.96611	5.12593	2.6687	6.56203	5.77313	3.89875	4.69055	2.39509	2.78475	2.9223	4.58103	3.01728	3.5404	3.90196	2.87993	3.74338	3.07928	4.29583	2.7236	2.40124	3.01973	3.77593	5.00664
GSE36376_GSM890378	4.69445	2.62847	2.21574	3.05615	2.76004	2.98716	2.51502	2.99594	2.8073	2.61373	2.82558	3.24835	5.81601	2.46287	6.06983	5.2322	4.03906	3.11276	2.38791	2.11282	3.11288	5.15601	3.05791	3.72035	3.12008	2.28741	3.31881	2.50693	3.67277	2.85409	2.53864	6.16738	3.12106	6.44982
GSE36376_GSM890379	2.94056	2.54286	4.14049	2.4709	2.74716	2.98779	2.95553	2.7205	3.25869	2.69702	3.01141	2.68124	5.10897	2.5305	6.8445	4.64559	3.27055	3.67641	2.46316	3.11054	3.00112	4.75059	2.77476	3.74109	3.4128	3.01677	3.38204	2.77684	6.37194	2.59228	2.58217	2.9421	3.2668	5.78233
GSE36376_GSM890380	3.00871	2.66538	2.66312	2.77584	2.61748	3.02272	2.60898	3.23755	4.71713	2.71735	3.49627	3.00029	4.79738	2.6272	6.60653	5.25331	5.54873	3.77008	2.48926	2.53398	3.47398	4.22864	3.00564	5.29938	3.61491	2.81391	4.41163	2.75095	4.71294	2.37114	2.50862	3.65202	2.87627	5.19574
GSE36376_GSM890381	2.92768	2.67565	2.40104	3.21554	3.38825	2.6709	3.03566	3.35507	3.22938	2.56521	4.063	2.66539	5.5412	2.76055	5.87154	4.65334	5.10652	3.31142	1.35643	2.74014	3.10949	4.80703	3.12565	2.83476	3.44816	2.39482	3.59327	2.92015	5.18364	2.42474	2.36462	3.03454	2.44524	3.66695
GSE36376_GSM890385	4.06092	2.51198	3.27709	3.28589	3.29951	3.08194	3.39882	2.30346	3.19409	2.54743	2.99623	2.54014	5.20413	2.68732	7.09058	6.27709	3.5995	5.87354	2.64275	2.77269	2.5453	3.91642	3.33206	3.08106	3.46793	3.13522	4.00938	2.49926	4.86463	1.92905	2.56938	3.17477	4.18354	4.91236
GSE36376_GSM890386	4.09162	3.8116	3.96322	3.79656	3.43093	3.06563	3.53821	2.74539	2.89321	2.79817	4.39144	3.37441	6.30921	2.82239	6.36054	4.25721	5.207	3.50783	2.66748	3.23113	5.34676	7.77163	2.91325	5.28499	5.61925	2.532	4.07413	2.49238	6.17941	2.57812	2.5601	3.29562	2.52237	4.94722
GSE36376_GSM890387	5.36243	3.67187	2.83379	4.05448	3.15836	2.77115	2.93624	4.02357	3.47511	2.55716	4.47135	3.00576	5.54704	2.63094	7.18533	4.13966	4.25054	4.99409	2.20252	3.70003	5.31522	5.3325	3.07741	5.89426	3.8482	2.44641	3.62559	2.58465	5.42858	2.45528	2.60496	5.53106	3.03073	6.26509
GSE36376_GSM890388	3.53987	2.87518	2.80584	2.80858	3.07971	3.15834	2.45492	3.37118	3.18171	2.7329	2.89105	2.91384	4.89834	2.67985	6.51195	4.23157	3.58857	5.55382	2.49765	3.11494	3.10067	4.68199	3.08998	3.36441	6.17225	2.31156	3.36688	2.5521	3.14513	2.39659	2.4871	4.35308	3.17203	4.45033
GSE36376_GSM890390	5.38672	3.2021	3.74578	3.88867	2.82951	2.7687	3.19916	2.55353	2.85693	2.60586	3.94167	3.52479	6.37775	2.70344	6.41212	3.84143	5.06746	5.85713	2.96405	4.00913	4.64989	4.865	3.25957	5.4436	4.10207	4.11472	3.26636	3.08592	4.80548	2.20265	2.62947	3.42793	2.46347	5.99078
GSE36376_GSM890391	3.24011	3.56114	2.85652	3.00677	2.79505	3.01512	3.31743	2.1067	3.31275	2.66219	4.35116	4.70462	5.85794	2.83515	6.17912	4.21974	3.14308	5.39128	2.80192	4.40066	5.9621	6.50517	3.32248	7.55145	3.57952	4.72329	3.31782	3.11483	6.06551	2.49374	2.46505	4.03026	3.25233	5.21233
GSE36376_GSM890393	3.34845	3.08902	3.12195	3.78585	3.17508	2.98471	3.44255	2.67755	3.92958	2.59726	3.22301	3.48766	5.68874	3.44538	5.42441	5.02746	4.87204	8.00469	2.41486	2.29472	4.35376	4.49406	4.30739	3.62047	3.55653	3.11432	3.52729	2.77156	5.00556	2.7111	2.57877	2.99342	6.2541	6.08986
GSE36376_GSM890394	2.63422	5.02005	4.63164	4.18072	3.42808	3.11948	3.89421	3.03308	3.51353	2.52516	5.70909	3.03134	6.48672	2.32353	6.10865	5.32442	4.3683	3.93012	3.56322	2.71704	5.74782	8.68614	2.90676	6.81966	3.48787	3.20002	3.36207	2.68591	8.39864	2.31016	2.7222	3.39612	3.14031	5.49838
GSE36376_GSM890395	4.46643	3.10774	3.26262	3.37888	3.49293	2.82223	3.38029	3.65292	3.26014	2.69687	3.96078	3.32048	4.72372	2.78772	7.22935	4.65262	3.31554	4.45738	1.52992	3.1795	4.19875	5.1132	3.30702	5.16254	3.36004	3.59274	3.88402	2.79928	6.70659	2.56383	2.76897	3.20143	3.1499	6.65554
GSE36376_GSM890397	2.88752	3.13014	2.32179	2.97494	3.04945	3.09704	2.59862	2.43821	3.3952	2.52694	3.48989	5.23754	6.32327	2.7294	5.0481	4.58261	4.21265	6.43831	2.85373	3.12597	3.53349	4.83659	3.65958	4.43812	4.20008	3.11293	3.42957	2.62029	4.94184	2.48542	2.4157	4.52186	3.48045	5.20334
GSE36376_GSM890400	3.00051	3.59812	3.58994	4.53511	3.53505	2.92249	3.23714	4.04942	3.46574	2.53502	3.62718	4.70485	4.91396	2.91185	5.923	5.11549	5.2224	3.73979	2.63304	2.88614	6.56575	4.54474	2.89362	5.99061	4.27897	3.24548	5.69326	3.42617	6.67252	2.48812	2.47527	3.16338	4.10061	4.21626
GSE36376_GSM890402	3.37737	2.62817	2.77169	2.7591	2.94771	3.11711	2.59021	2.80486	3.087	2.75644	3.9212	3.01399	4.37848	2.67694	6.56345	5.00297	3.8289	3.34791	3.47773	2.62371	3.30483	5.82796	3.25749	4.73999	4.26187	2.78749	3.64122	2.44949	6.06374	2.99368	2.31253	3.3168	3.05399	5.39388
GSE36376_GSM890403	3.00403	2.64267	3.64451	3.09457	2.56964	2.90318	2.1983	1.64787	3.18794	2.58594	2.7763	3.2863	6.02901	2.63584	6.9722	4.35062	3.05169	3.36879	1.68896	2.2175	3.34574	4.72481	3.23616	3.81892	4.93476	3.00714	4.40417	2.67617	3.40693	2.43644	2.54544	4.49549	4.1704	5.09983
GSE36376_GSM890407	3.12308	5.15608	3.69372	4.47042	3.07007	3.179	4.15409	3.59782	3.42334	2.87128	4.60421	4.17564	6.4387	3.41578	5.79742	4.45234	4.98719	6.27559	3.05236	2.95462	6.72012	5.34393	4.18083	5.84736	4.45649	3.47172	4.09359	2.91001	4.95477	2.36188	2.78149	3.26576	4.14668	3.87803
GSE36376_GSM890408	3.11456	2.89235	3.17914	4.03585	3.13394	2.41682	2.93646	3.0468	3.06265	3.14946	3.71632	2.57606	7.08798	3.61167	5.85342	3.83267	4.57944	4.70021	2.55422	3.05229	3.15499	4.15433	3.37551	3.20577	3.3291	3.19153	4.10913	2.66094	2.57943	2.73853	2.62647	3.33179	4.58316	4.49942
GSE36376_GSM890409	6.00505	3.02256	2.99284	4.70587	2.73712	2.79525	2.70583	2.5268	3.15592	2.634	3.73958	3.74573	5.81032	2.57092	6.26852	3.69766	3.25554	6.60879	2.21659	2.75134	4.65668	4.83328	2.83903	6.13557	3.99936	3.13731	3.0505	3.20481	5.52858	2.16984	2.54063	3.80306	3.86262	5.70475
GSE36376_GSM890410	3.2223	2.63758	2.51594	3.03311	2.58768	2.77343	2.93563	2.92589	3.29158	2.60322	4.29321	2.73035	4.45704	2.56184	6.39894	3.89568	3.16798	3.63828	2.82096	2.25742	3.55058	5.27606	2.83398	4.33315	3.20985	2.69539	3.39714	3.52714	4.96122	2.29936	2.68932	3.11394	3.10361	5.63986
GSE36376_GSM890413	2.96571	2.58965	3.18474	2.9406	3.33451	3.18346	3.50525	3.05027	3.4883	2.81426	2.74595	2.77432	5.54704	2.60134	6.66511	5.35917	3.78114	3.75352	2.33304	3.13001	2.67328	4.41811	3.30161	3.2738	3.34114	3.25041	4.585	2.29052	2.63732	2.67267	2.4347	5.40378	3.53351	5.82828
GSE36376_GSM890415	2.99937	2.63273	2.84863	3.40469	3.42661	2.8545	3.23795	2.15914	3.89792	2.58556	2.96948	2.94348	5.61124	2.70905	6.81667	4.96936	3.79474	8.13589	2.1946	2.74561	3.34737	4.10034	2.70125	4.67049	3.50132	2.9755	3.77527	2.45424	4.16654	2.57763	2.38215	4.45467	2.92219	5.92645
GSE36376_GSM890418	3.18387	3.14228	2.7259	3.4795	3.12089	2.66107	3.27579	3.69357	3.8423	2.5704	3.58963	3.02833	5.32204	2.71269	6.94997	4.26482	3.16066	5.11025	2.54084	2.85457	3.40892	4.37441	3.64881	4.1581	3.20798	2.59725	3.88173	2.69059	3.89524	2.38119	2.54293	3.18016	3.38468	5.16588
GSE36376_GSM890419	3.16174	2.43363	3.04333	2.53551	2.88966	3.11948	3.1065	3.42461	2.88461	2.74841	3.34369	2.51937	4.22837	3.01155	6.59128	3.69672	4.18586	2.85267	2.81007	2.6442	3.21853	4.34876	3.1966	3.49635	3.35471	2.83472	3.33843	2.51427	3.76587	2.42714	2.46406	3.07749	2.95621	5.19882
GSE36376_GSM890426	2.91195	6.5509	2.58532	2.52627	2.8089	2.83842	3.2453	2.70698	2.96235	2.55408	3.4345	2.35419	4.48566	2.60584	5.00276	4.68448	3.22469	3.49157	2.83368	2.71836	2.83759	5.10433	3.25412	3.66163	3.34098	3.23772	3.36086	2.5261	4.56639	2.55146	2.41792	3.87746	3.05675	6.51158
GSE36376_GSM890427	3.38519	2.93985	2.89008	2.65432	2.85589	2.83287	2.48572	3.41092	2.93829	2.85273	3.72168	3.82201	5.65826	2.76229	5.89956	4.02167	4.45525	6.21964	2.8952	2.47443	6.53871	4.80216	3.76992	4.26472	3.66752	3.14852	4.2528	2.71915	5.78412	2.74692	2.60893	3.31613	3.27618	6.17935
GSE36376_GSM890431	3.81244	2.47626	2.51728	2.45956	2.88324	2.86567	2.30708	3.24993	2.94237	2.98066	2.95891	2.94784	5.79746	2.55035	6.1124	5.79743	4.95464	6.21664	2.53507	2.30458	2.98099	3.77406	2.64903	3.48013	4.26962	2.39568	3.80166	2.82491	2.55093	2.78759	2.4694	3.56026	3.8784	4.77341
GSE36376_GSM890434	3.18371	2.34565	3.02608	2.8204	3.31246	2.57474	2.63364	2.42202	2.80084	2.46059	3.60924	2.67792	5.3334	2.84507	6.75612	3.66955	3.91986	4.98191	2.39509	2.72218	3.37943	3.99487	3.52365	3.38881	3.47562	2.19192	3.40358	2.28501	4.41097	2.61646	2.34234	3.84495	4.08445	5.4082
GSE36376_GSM890437	4.15384	3.27654	3.22812	2.96934	3.36678	2.3385	2.74122	2.83078	3.46059	2.58149	4.33379	3.47234	5.77299	2.4718	6.67146	4.42027	3.75421	4.89803	2.85963	2.75598	5.45389	4.1423	3.75738	4.00111	3.15615	3.04932	4.27055	3.01143	5.18486	2.23594	2.50247	3.37627	2.81325	5.73233
GSE36376_GSM890438	3.07926	2.91935	2.30074	3.15933	2.83128	2.81738	2.73679	2.46661	3.91925	2.66584	4.52525	3.07915	4.92909	2.89053	6.1964	5.79847	4.11263	5.98508	2.51249	2.98854	3.17313	4.13228	2.90861	5.32779	3.79804	2.52269	3.24296	2.60243	4.1421	2.74336	2.52305	3.18022	3.32126	5.32153
GSE36376_GSM890439	4.56711	2.69162	2.84369	2.55023	2.76954	3.03781	2.96663	3.50657	3.27994	2.59783	3.55752	2.43464	4.5059	2.49711	6.3308	4.63856	3.82475	3.22361	2.30518	2.5773	3.07387	4.05845	3.11473	3.80663	3.49834	2.55936	3.37323	2.69875	3.85262	3.03126	2.52605	3.01655	3.39757	5.91204
GSE36376_GSM890453	2.88838	3.22083	2.41501	3.54313	3.52385	2.83842	3.20545	3.04394	3.00758	2.64381	4.48221	3.20214	5.40207	3.35963	6.23051	4.9274	5.1185	4.89332	2.74253	2.72732	4.174	4.5292	4.39973	5.35112	3.80114	2.9675	4.14841	3.00712	4.81027	2.4636	2.53231	4.29389	3.44032	5.3357
GSE36376_GSM890455	3.3711	2.98048	2.47435	3.41842	2.82389	2.94854	2.6058	3.11534	2.97036	2.90734	4.605	3.00729	4.61192	2.86798	5.21462	4.02603	5.75138	4.43878	2.58991	3.04004	3.25312	4.69932	3.96554	4.02953	3.49479	2.65353	3.27325	2.58962	4.40441	2.7383	2.56636	3.27667	3.08076	6.15933
GSE36376_GSM890458	3.34383	2.53692	2.62985	2.54532	3.23044	2.58453	2.55442	3.00621	3.37023	2.52495	2.86825	2.97663	4.56611	2.83171	6.25807	3.76732	3.42916	4.06508	2.99502	2.41896	3.43906	4.1431	2.52438	3.76293	3.30834	2.46367	3.2226	2.78018	3.7001	2.77013	2.20543	3.43193	3.084	5.6474
GSE36376_GSM890459	4.42056	2.90057	1.82251	3.87633	4.10831	2.75986	3.23819	2.99217	4.14115	2.56861	3.46675	2.40651	6.01058	2.58483	7.02427	6.85238	3.81883	3.67245	3.01994	3.20106	3.46346	4.01416	3.55882	3.39593	3.70885	3.12108	3.95193	2.98925	3.60032	3.45893	2.43098	3.56744	3.87429	5.00801
GSE36376_GSM890460	6.13925	3.21275	1.85994	2.86093	2.82595	2.86059	3.04712	3.70004	3.3982	2.89679	4.51389	2.61888	5.00398	2.67865	5.80017	4.94601	3.68072	3.87058	2.36969	3.47793	3.4259	3.98317	3.01429	3.94487	5.32907	2.48871	3.69594	2.98436	4.74239	2.62166	2.34091	3.348	3.36791	5.87569
GSE36376_GSM890461	3.62807	2.90236	2.80329	3.74414	3.46215	3.24022	3.09438	2.46159	3.58635	2.61748	3.2783	2.67554	5.57007	2.71684	6.04163	5.34149	4.27125	4.90041	2.64185	2.99541	3.3882	4.69825	3.20747	3.60157	3.6931	2.99247	3.20157	2.74329	3.9619	3.02819	2.48694	3.20529	3.34998	4.62707
GSE36376_GSM890464	2.90295	2.88289	2.61132	2.73821	3.00941	2.88319	2.97225	3.30122	3.72349	2.48005	3.42336	3.10526	5.54704	3.01235	5.11958	4.44937	4.30981	3.5196	2.48727	2.77498	3.64231	3.99677	2.98315	3.84178	3.89298	2.87149	3.38574	2.70592	6.73175	2.52829	2.7412	3.04666	4.69498	5.00387
GSE36376_GSM890469	3.11094	2.75318	2.81321	3.1795	2.8676	2.74217	3.7629	3.19554	3.27585	2.68017	3.47587	2.77745	5.29413	2.71511	6.56082	5.40606	3.60589	3.66123	2.43226	3.27428	4.38553	4.94045	3.30146	6.1041	3.29122	3.15387	3.53989	3.62276	5.45587	2.47774	2.42655	3.13539	3.73447	5.16435
GSE36376_GSM890470	3.46222	2.92753	3.40208	2.97147	2.63153	2.73937	2.31638	3.11155	2.82659	2.65545	3.42547	3.18958	4.91884	2.88569	5.75339	4.17464	4.12049	5.02307	2.61645	3.08126	4.12002	4.85707	2.821	4.54578	4.42026	3.45353	3.38507	2.98218	5.71624	2.77367	2.30866	3.39163	3.77987	5.20973
GSE36376_GSM890471	6.65328	4.13942	4.95699	3.33778	2.9678	3.01741	3.71164	3.20506	3.10776	2.70257	5.15733	3.7559	6.53578	3.41334	6.91533	5.64962	3.81508	4.13576	2.63402	2.7342	5.1303	12.4309	2.31632	5.11587	5.48498	2.42237	4.6732	2.47559	7.68788	2.52443	2.58552	3.63784	3.12798	4.95991
GSE36376_GSM890473	5.52032	3.07269	2.32604	2.46198	2.85601	2.93002	3.07171	3.22936	3.49965	2.63962	3.31842	2.85023	6.10463	2.66701	6.45617	6.49964	3.76145	4.20614	2.80833	2.92879	3.33005	3.99388	2.97679	3.47704	4.01811	2.88485	4.09732	2.63971	4.67891	3.00362	2.51555	3.23381	4.10252	4.69369
GSE36376_GSM890475	2.8995	2.65411	2.60253	2.94709	2.55458	2.60179	2.67047	3.3741	3.43715	2.67496	3.3296	2.96095	4.71355	2.76993	6.33659	3.78322	3.54311	4.12901	2.08016	3.21196	3.72277	4.24126	2.41453	5.39193	3.29851	2.74282	3.55364	2.90837	4.41732	3.05144	2.42487	3.99846	3.18044	5.59222
GSE36376_GSM890476	3.03499	3.16959	3.36265	2.70921	3.13994	2.69622	2.20125	2.40596	3.48171	2.59688	3.57059	3.72054	5.81032	2.61908	6.05695	4.65959	3.38004	4.72373	2.40374	3.25681	4.24015	5.04535	3.08907	5.01626	4.65718	2.93226	3.30675	3.10429	5.08593	2.4636	2.53719	3.41649	4.14469	4.89378
GSE36376_GSM890480	4.15534	2.65074	2.21712	2.50788	3.43709	2.87691	2.70233	2.503	3.54264	2.65045	3.14621	3.3113	5.65826	2.67099	5.89509	5.26524	3.80612	3.98774	2.77023	3.06337	2.80414	3.61614	2.62588	3.46098	3.38494	2.43649	3.36448	2.52563	3.47407	2.70191	2.53868	3.76897	3.48064	5.64925
GSE36376_GSM890481	5.22361	2.99715	2.57732	3.32405	2.68182	2.84689	3.32699	3.82357	3.19911	2.6738	3.59189	2.81468	5.71891	2.75763	6.23595	3.89641	4.23735	3.70154	2.84222	3.13236	3.34184	4.38436	4.06198	4.05145	4.46868	2.83308	3.99787	2.81447	4.68046	2.81077	2.38686	3.50078	4.42334	5.61253
GSE36376_GSM890482	3.02665	2.57705	2.6146	2.81142	3.51675	2.78379	2.81012	2.78179	2.96724	2.79738	3.75109	2.42837	4.66269	2.53761	6.36468	3.69672	3.60486	3.43644	2.83125	2.3162	3.24838	4.57573	3.36602	4.26626	3.01398	3.06349	3.73211	2.98238	4.10623	2.79374	2.51928	3.45081	3.40639	5.4808
GSE36376_GSM890483	4.07976	2.54975	2.81564	2.54712	2.99276	2.3385	3.16628	2.69685	3.32511	2.57278	3.29423	2.64199	5.04132	2.78517	5.54472	4.73876	4.14412	4.47078	1.56994	2.2175	3.22356	4.20343	3.23195	3.8714	3.80755	2.84086	3.30281	2.99534	4.08053	2.59328	2.47533	3.7628	3.71804	5.10778
GSE36376_GSM890484	3.15226	4.4357	4.12683	3.25097	2.68373	2.41682	3.91771	2.85846	3.81862	2.65754	4.02708	5.5341	6.08623	2.7503	5.52929	3.12728	4.69069	3.67182	2.29009	2.9456	6.30761	5.75754	2.97255	5.96276	4.22644	4.19309	3.86142	3.92467	5.83068	2.68372	2.5745	3.68533	3.99376	5.38051
GSE36376_GSM890485	4.05415	3.1285	3.15831	2.98513	2.66624	2.71129	2.61743	2.73528	3.16145	2.65301	4.22908	3.34647	4.98211	2.77355	6.02639	3.95598	3.86366	4.07177	2.54472	2.85795	4.05094	5.17116	3.03096	5.43229	3.41266	3.46024	3.27976	2.91653	5.16147	2.21572	2.58795	3.37122	3.70718	5.80817
GSE36376_GSM890487	3.37018	3.03857	3.40912	2.98358	3.30329	2.85188	3.43595	2.81312	2.88099	2.98395	4.28419	2.92109	6.65865	3.14281	5.44011	5.34003	4.50837	3.7953	3.0512	3.11811	3.36548	4.18771	3.50884	5.74587	3.25922	4.28856	3.58271	3.12711	7.01951	2.67917	2.46688	2.77759	3.15422	4.46078
GSE36376_GSM890488	3.97557	2.70805	3.83908	3.09305	2.52521	2.84946	2.53466	2.7297	4.78318	2.62449	3.84359	2.98916	6.73604	2.79186	6.64299	3.71779	2.93588	4.34905	2.70348	2.71581	3.25709	4.39298	2.31586	3.15315	3.43689	3.30308	3.12067	3.32961	2.96044	2.38881	2.6167	3.05514	3.35513	3.49486
GSE36376_GSM890492	4.19333	2.77285	2.95655	2.81917	2.54509	3.03781	2.98157	3.36177	3.23453	2.71141	4.43826	2.19959	4.73405	2.79765	5.94246	3.7524	3.96004	4.27234	2.9946	3.3276	3.16279	4.18231	2.74601	4.78422	3.44995	2.63151	3.38094	3.19462	4.53083	2.54999	2.42417	3.51091	3.37414	6.14323
GSE36376_GSM890493	2.77903	2.9026	2.66427	2.62386	3.07377	2.92833	2.70052	2.99196	4.05031	2.60605	3.25745	2.7584	5.34422	2.53005	5.57543	4.03988	3.96516	4.34905	2.09735	2.7399	3.14672	4.59648	3.05915	3.56178	3.77015	3.04543	3.66966	2.73946	3.95057	2.67543	2.38119	3.3998	4.09829	4.56731
GSE36376_GSM890495	4.86944	2.68684	2.77038	2.66091	3.1222	2.71465	2.40335	3.00361	3.45654	2.68814	3.44918	2.1696	5.08785	2.7956	6.55597	4.11971	3.46449	4.14633	2.75943	3.45663	2.97667	4.03473	3.29015	4.08444	4.08178	3.05177	3.80392	3.93507	4.2636	2.23066	2.64472	4.06858	3.30748	4.2515
GSE36376_GSM890497	3.75949	2.91399	2.8873	2.50621	2.56688	2.60179	3.09883	2.67857	3.60548	2.89097	2.92095	3.0557	5.79746	2.56811	6.13643	3.79475	4.42468	3.87356	2.33841	3.0146	3.02449	4.00839	4.14047	3.0966	3.47717	2.94068	3.07396	3.06094	2.31928	2.65243	2.25248	3.75629	3.46159	4.94356
GSE36376_GSM890500	2.93078	3.61516	3.72973	3.38893	2.93859	2.81875	3.48524	3.14216	3.6348	2.61201	3.05799	3.06301	5.23768	2.54471	7.73794	5.6247	3.82268	3.81066	2.77816	2.81007	3.92683	4.0187	3.0521	3.98268	3.3571	2.5136	3.4239	3.26694	3.38265	2.81602	2.5399	3.4587	3.45502	5.33797
GSE36376_GSM890501	2.896	3.56488	2.97693	4.03245	2.47157	3.22394	2.8767	3.26215	3.42731	2.84407	3.5165	2.75663	5.65826	2.84081	5.42927	4.19445	5.1902	4.26588	3.59314	3.72948	4.59446	4.07363	3.53226	4.96422	3.69084	3.01599	3.36106	3.40608	3.98667	2.62783	2.62572	3.5342	3.51533	5.40488
GSE36376_GSM890503	3.98927	4.18912	3.3761	3.10929	2.73597	2.61831	3.30424	2.74917	3.39869	2.7659	4.70425	3.89555	5.54704	2.83587	6.53986	6.00453	4.24037	3.72777	2.83893	2.61353	4.9498	4.66948	2.91287	5.74142	3.24607	3.10364	3.5282	2.85552	5.33682	2.74775	2.5806	3.75495	3.33119	6.14182
GSE36376_GSM890505	3.37527	2.74203	2.17635	2.86637	2.95253	2.77115	3.05001	2.42363	3.52091	2.85221	3.09181	2.89806	5.56415	2.85247	5.85669	4.30632	3.39177	3.47684	3.06381	2.93427	2.77083	3.92452	2.95244	3.61836	3.77236	3.00174	3.51795	2.89591	3.72746	2.86144	2.45681	3.3953	3.53214	4.49809
GSE36376_GSM890508	3.36218	3.85222	3.59552	3.24313	2.57533	2.6709	3.61494	3.24091	3.31793	2.67184	4.07122	3.38208	5.71891	2.63174	7.58742	5.46442	4.55776	4.83237	2.05001	3.10148	5.89019	5.2289	3.3188	8.36824	4.85814	4.01716	3.54962	2.89957	7.12637	2.51083	2.33689	3.5622	4.17166	5.70347
GSE36376_GSM890509	2.84108	2.48674	2.73508	3.18964	3.16471	2.60982	2.56128	2.53682	4.16339	2.68349	2.86114	2.56832	5.45987	3.08428	5.61671	4.5994	3.31184	3.52004	2.68934	2.58402	3.00591	4.04168	2.69828	2.78665	3.47434	2.55856	3.85428	2.90872	2.97755	2.83757	2.25581	3.01831	3.55347	4.09081
GSE36376_GSM890510	2.57759	3.50331	3.35537	3.06936	2.80326	2.61831	3.44518	3.43213	3.13374	2.68218	3.38669	2.45992	5.61743	2.87464	6.41782	5.02882	4.02279	3.96468	2.41815	2.77958	4.5493	4.34497	3.64881	4.8718	3.63577	2.15118	3.55632	2.9354	6.1259	2.42977	2.45875	3.12457	3.48169	5.9733
GSE36376_GSM890511	3.53163	2.8703	2.91857	2.58059	2.79535	2.61831	3.0375	3.0415	4.70877	2.60316	2.8563	2.49147	5.51728	3.00838	5.86255	4.88953	3.7092	4.0668	2.63318	2.12822	3.14235	4.28648	2.34108	3.32219	3.41567	2.39482	3.38322	2.79147	2.94852	3.00091	2.42204	2.86976	3.66649	4.67438
GSE36376_GSM890512	2.85252	2.85815	3.17718	3.66733	2.60434	2.58453	2.83909	6.37759	3.1361	2.81551	3.76865	2.89908	5.99908	2.62732	5.86677	6.23734	3.18159	3.90556	2.27828	2.90158	3.67604	3.84205	2.80425	3.65964	3.57833	2.89404	4.43266	2.78926	4.16075	3.15194	2.51351	3.33699	3.89697	5.16887
GSE36376_GSM890513	2.82634	4.17029	2.35985	3.29109	3.20549	2.69622	3.00808	3.18891	3.62923	2.62491	3.17278	2.59859	5.75535	2.65793	5.67758	5.52727	4.29947	3.68513	2.20458	3.38923	4.20886	4.20545	3.16506	4.34112	3.80926	2.95984	3.78172	2.93715	3.61963	2.43786	2.48733	3.82743	4.00116	4.85472
GSE36376_GSM890514	2.55923	3.18602	2.10138	2.77993	2.63923	3.07363	2.37476	2.67406	3.62593	2.66913	2.62822	3.12771	5.25482	2.81117	6.53119	4.77552	3.55543	4.44251	1.97443	2.54456	3.18271	3.67246	1.91679	3.72885	3.61577	2.80982	3.54944	2.65554	3.43174	2.6603	2.38175	3.29691	3.41677	4.421
GSE36376_GSM890515	3.15287	2.5465	2.56369	2.70559	3.05624	3.08154	2.6121	3.52928	4.04332	2.67647	2.81774	2.58619	5.83404	2.74195	6.97516	5.87192	3.50463	4.77827	2.6544	2.85043	2.81441	3.75317	2.74283	3.13397	3.0782	2.99836	3.17205	2.65827	3.88461	2.52753	2.46952	3.30688	3.71692	4.26659
GSE36376_GSM890519	3.56601	3.47921	2.56721	2.845	2.96767	2.87469	3.40852	3.36248	3.22697	2.60338	3.52525	3.28397	4.81233	2.72443	5.69278	4.8881	3.47971	3.80359	2.61844	3.47733	4.71171	4.19872	3.4797	4.94683	3.24607	2.91134	3.93819	2.87328	4.35894	2.59867	2.46597	3.29292	3.42687	5.88959
GSE36376_GSM890523	2.8328	3.14228	3.79138	2.6707	2.84538	2.80245	3.06116	2.72211	3.61801	2.61891	3.59172	2.66194	5.06175	2.82715	5.67982	4.02568	3.53361	6.1248	2.29643	3.60785	3.90904	4.78725	3.07741	5.03887	2.45964	3.2736	3.47939	3.34526	4.3531	2.99981	2.68077	2.93059	4.01135	7.11915
GSE36376_GSM890526	2.98301	3.61516	3.9482	4.57438	2.3039	3.16309	3.248	2.32515	3.74239	2.54065	4.36057	3.85436	6.96141	2.30735	6.10397	5.22656	4.26124	3.93069	3.55721	2.20353	5.4172	4.7415	3.17953	5.01509	3.42551	3.0187	4.42128	2.40658	7.31854	2.47858	2.61374	3.39048	3.57047	3.67653
GSE36376_GSM890534	3.0041	2.70978	2.73976	2.64899	2.46193	2.76223	2.51455	3.51782	3.46927	2.73943	2.44158	2.87196	5.02012	2.23958	6.64174	4.47113	3.38857	4.0066	2.75914	4.82916	2.89323	3.74493	2.73566	3.34549	3.03076	2.42151	3.23191	2.62815	4.12273	2.84392	2.56728	3.553	3.69698	5.41433
GSE36376_GSM890537	2.75923	3.58425	2.60779	3.26532	2.92993	2.97763	3.76598	2.41012	3.01992	2.7108	4.07517	3.15593	5.91382	3.12905	6.3849	7.73354	3.38857	4.94912	2.34969	2.81996	4.30243	5.20368	2.53466	3.93943	3.72089	2.58225	3.3687	2.5121	4.53743	2.91642	2.5632	4.19024	3.98303	5.70163
GSE36376_GSM890538	2.75064	2.5226	2.57571	3.2996	2.92585	2.62568	3.06466	3.97468	3.1145	2.59022	3.28947	2.48479	5.79109	3.02379	6.31066	4.30811	4.10969	4.84442	2.89898	2.68372	2.90554	3.96187	2.98639	3.27514	3.66241	2.95109	3.35118	2.73346	3.72943	2.68874	2.66282	3.39146	4.80048	4.0562
GSE36376_GSM890539	3.38975	2.7621	1.81422	3.35819	2.97236	2.67967	2.74754	2.82818	3.81954	2.63164	2.78681	3.028	4.47643	2.51449	4.47548	4.9724	3.55378	3.97783	2.17698	3.18673	3.40054	3.92677	3.19244	3.90824	2.98381	2.9268	3.66945	2.76611	3.47571	2.4068	2.68379	4.31114	3.93172	5.26168
GSE36376_GSM890540	2.93862	3.61651	2.54626	3.78386	2.83637	3.02068	3.35237	3.21492	3.77259	2.72794	4.37888	3.28218	5.15465	2.79886	6.70913	6.13206	3.96785	3.70293	2.42153	2.62696	4.65917	5.34513	3.31438	5.41514	3.78983	3.04979	3.74034	3.00872	5.92488	2.56523	2.50566	3.18582	3.9266	5.90149
GSE36376_GSM890545	2.7363	3.56222	2.6487	3.50308	2.65095	2.78761	3.30978	2.94385	3.67104	2.40581	3.56238	3.65541	4.46658	2.81004	6.70636	3.77575	4.4265	4.21117	2.15741	2.53937	5.05983	5.29653	2.66338	5.31451	4.00243	2.80014	3.42501	3.44561	4.66154	2.83509	2.57331	3.42178	3.90797	5.10179
GSE36376_GSM890547	3.86923	2.98646	2.68568	3.19037	2.7373	2.89826	3.26151	4.72211	3.16593	2.75213	4.4946	2.68124	6.15684	2.46902	6.33986	5.08707	4.36449	3.60095	3.3282	3.22325	2.95815	5.58558	3.52365	3.21453	3.39842	3.75465	3.82764	2.78598	4.63767	2.29466	2.91136	4.39599	4.68964	4.55108
GSE36376_GSM890548	2.93788	2.93703	2.62348	4.36591	2.68452	2.80245	3.36493	3.79039	3.14009	2.70973	3.87845	2.97916	5.74365	2.09198	6.47943	5.19738	5.35288	3.94589	3.32466	3.48524	3.15973	4.13653	3.42381	3.12828	3.45722	4.17298	4.45455	2.48473	3.92275	2.14484	2.78366	3.11781	3.87429	4.69482
GSE36376_GSM890554	3.6862	3.09758	2.85618	2.97835	2.71447	2.73085	3.22372	2.76519	3.42301	2.48228	3.38211	2.87575	5.06683	2.81558	6.96436	4.91167	3.4215	4.70569	2.29989	2.52489	3.79058	5.1758	3.10362	4.93477	5.71404	2.33434	3.37967	2.99352	4.90652	2.807	2.41083	3.9047	3.45168	5.12055
GSE36376_GSM890555	2.88548	2.91879	2.71126	3.16558	3.07025	2.83842	2.32773	2.83351	3.48593	2.59486	3.76116	2.98131	5.06683	2.98566	6.28816	4.8193	3.21891	3.80011	1.77618	2.81045	4.49234	4.80323	2.80106	6.17046	3.51293	3.55749	3.459	3.9623	5.16391	2.57278	2.57525	3.74206	3.02784	4.76326
GSE36376_GSM890559	3.16451	2.44307	2.75495	2.98903	3.03704	3.06873	3.58767	3.61781	4.03871	2.6892	3.54833	2.27114	6.03559	2.88091	5.74553	3.95433	4.83457	6.07729	2.1017	3.24069	2.89425	3.97806	2.69	2.81813	3.60235	2.60194	3.31916	2.7228	2.66447	2.58351	2.4421	3.26789	4.62854	3.54727
GSE76427_GSM2011287	3.00722	2.87416	2.49425	2.86731	2.87939	2.92455	2.81145	2.43972	4.30464	2.47928	3.96609	2.8884	4.80571	2.80164	6.16479	4.63254	2.90733	4.07984	2.61182	2.47363	2.54997	4.69879	3.15666	3.95942	3.10862	3.12639	4.22473	3.0284	3.90255	2.69371	2.38882	3.33972	4.04004	6.23292
GSE76427_GSM2011290	3.13911	3.32771	3.15527	3.30263	2.69374	2.96139	2.80653	2.37675	3.42827	2.71308	3.74436	3.45919	6.17309	2.82059	6.56834	4.70151	5.24974	3.9497	2.61327	2.57564	4.30238	4.36224	2.7483	4.71288	5.18002	2.59561	3.58022	3.06084	4.04765	2.87497	2.26014	3.39135	4.31663	5.11793
GSE76427_GSM2011291	4.68088	4.64214	3.49932	3.88462	3.52258	3.55494	4.4381	3.04951	3.15732	2.69882	5.78442	4.25028	5.11007	2.82463	6.6944	4.67145	4.95695	4.7371	2.47141	3.25031	6.0875	7.34185	2.91764	6.85048	3.62175	3.26472	3.90912	2.67292	7.05797	2.80187	2.37907	6.69551	4.21184	6.26768
GSE76427_GSM2011292	2.80386	2.65049	2.40445	2.76352	3.02536	2.87953	2.78056	2.75452	3.16494	2.6621	3.31398	2.77076	5.14861	2.61145	5.71482	3.93359	5.71205	5.19417	2.77508	3.12679	3.16741	3.70442	3.09188	3.83432	3.80204	3.54079	3.27614	2.91315	4.77053	2.84319	2.69572	3.55721	4.53219	5.52074
GSE76427_GSM2011295	4.01743	2.5265	2.52911	2.88093	2.81125	2.96544	2.87478	2.55083	3.02289	2.52222	2.75686	2.70499	4.78581	2.50787	5.80355	4.39166	4.15744	4.15915	2.45041	3.10456	2.76106	3.38261	2.71863	3.03579	3.65299	2.60503	2.31092	2.87952	3.65555	2.79543	2.32691	3.65349	4.12996	4.18584
GSE76427_GSM2011297	2.97681	3.27782	2.8923	3.03243	2.78349	3.04693	2.81048	3.15152	3.46222	2.65486	3.98102	3.22369	5.6501	2.58556	5.69504	3.40277	3.16349	6.07593	2.46231	2.38278	3.49164	4.47151	3.22109	4.81177	3.17896	2.64681	3.21572	2.75575	4.68457	2.41265	2.56367	3.73353	3.8485	5.28376
GSE76427_GSM2011298	3.00627	4.41796	3.65608	4.04952	2.70877	2.78396	3.24908	4.29736	3.46307	2.75125	3.92316	5.62768	5.08898	3.15917	6.14346	3.9089	4.60825	3.66305	2.44009	2.16412	6.2598	5.79724	3.25808	5.73258	4.34231	3.11496	3.89482	3.35187	4.20161	3.24249	2.57324	4.11596	4.09352	4.82264
GSE76427_GSM2011299	5.73225	3.22215	2.66241	3.08743	2.78009	2.93844	2.88058	3.06887	3.30796	2.62327	3.47812	2.76881	5.22568	2.60668	7.10291	3.93814	4.21582	5.10743	2.52947	3.50931	3.09795	4.6176	3.45884	3.87503	3.87398	2.71782	3.70057	2.88562	6.91621	2.77524	2.56198	3.4741	3.57894	6.31639
GSE76427_GSM2011300	3.0272	3.15664	2.51699	3.00384	2.75999	2.80143	2.89386	2.41557	3.33816	2.5738	2.68199	3.07412	5.3511	2.38146	6.16479	5.00676	3.98369	5.05911	4.64848	2.5334	3.19447	4.19304	3.67426	3.61615	5.24021	2.7802	3.90942	2.90303	4.23746	2.60665	2.34032	3.5201	3.57211	4.55336
GSE76427_GSM2011301	2.70926	2.65458	2.63515	3.09166	2.70188	2.81593	2.80382	2.70826	3.65762	2.606	3.72962	2.58538	6.697	2.84669	5.56328	4.53209	3.88533	4.78783	2.80631	2.3135	3.24539	4.96481	3.55278	4.54611	3.4807	3.0541	3.42153	2.70515	4.69367	2.47885	2.59419	3.47345	3.24969	6.09332
GSE76427_GSM2011302	3.05917	3.84415	2.94822	2.99383	2.88707	2.96306	2.96365	3.13732	3.70809	2.65695	4.79967	3.94004	5.24657	2.76994	5.66131	3.8808	3.82278	3.97723	2.26891	2.54718	4.32799	4.38771	3.7391	4.72414	3.19994	2.94972	3.23409	2.99014	4.11606	2.32632	2.5713	4.14319	3.48238	4.26114
GSE76427_GSM2011303	3.24303	2.46916	2.31463	2.85345	2.79915	3.00925	2.88011	2.83541	3.01319	2.67858	3.25112	2.00482	3.43696	2.86022	4.74644	4.98771	3.35993	3.63483	2.59991	2.75714	2.71186	3.69138	2.55946	3.88834	3.34124	2.33896	3.76144	2.87197	3.7804	2.8404	2.2885	3.54892	3.40707	7.8061
GSE76427_GSM2011304	2.8313	2.79841	2.48261	2.66216	2.93203	2.8921	2.90077	3.59948	4.92127	2.83981	3.83557	2.23594	6.36813	2.38583	4.90286	3.94884	3.46824	4.20175	2.6275	2.21382	3.04979	3.8761	3.15073	3.87834	3.48636	2.14753	3.72012	2.91877	3.84038	2.3847	2.49147	3.39541	3.54792	5.02615
GSE76427_GSM2011305	3.44554	3.65323	3.20023	3.32257	3.47384	3.68312	5.42162	4.38011	3.14988	2.66424	5.049	3.59356	4.8636	2.93254	6.87735	5.27811	4.11021	4.69506	2.87311	2.67865	5.47281	6.80833	3.19589	5.3925	3.17345	2.03866	3.75894	2.95899	7.19619	2.17232	2.4984	6.78518	4.15998	6.2767
GSE76427_GSM2011306	4.66825	3.77835	3.14434	3.76603	3.09607	2.87184	2.9857	3.69506	3.96436	2.75539	2.85044	3.68868	4.70541	2.74442	6.08548	4.9744	4.26046	5.24664	2.63591	2.77736	4.54283	5.12312	3.26812	5.04613	4.06682	3.17402	3.24981	3.2558	5.08857	2.25979	2.60249	3.62162	3.71078	5.01851
GSE76427_GSM2011307	3.4695	2.76744	2.51179	4.13249	3.21015	2.8056	2.79231	3.32744	3.5816	2.9773	4.05042	2.8441	6.05461	2.52325	6.52359	4.85401	3.64994	4.32831	2.94826	2.99606	3.08145	2.94193	3.3086	3.48246	3.15048	2.52661	2.67343	2.99451	4.34811	2.06188	2.41415	3.21866	3.08413	3.83305
GSE76427_GSM2011308	3.37038	2.51825	2.59165	2.49032	2.57582	3.0495	2.9641	3.09048	3.05529	2.64641	3.13629	3.2701	5.33031	3.17445	7.32012	3.7535	3.42799	4.66801	2.05716	2.75394	3.51713	3.93797	2.30578	3.18564	3.35383	2.67028	2.98968	2.6267	4.62528	2.61298	2.54175	4.02888	3.56007	4.51271
GSE76427_GSM2011309	3.43961	2.8919	2.712	3.01817	3.12984	3.10823	3.0855	3.03423	3.46791	2.64969	3.16533	3.57156	5.52034	2.5438	7.00056	5.15327	3.33181	4.35767	2.51894	2.72841	3.29684	4.32965	2.72384	3.0032	5.35441	1.91007	3.1996	2.71757	3.4757	2.66897	2.48337	4.224	3.45259	4.60608
GSE76427_GSM2011310	3.02437	2.67025	3.09797	3.12153	2.77073	2.61681	2.7167	3.76574	2.98714	2.4551	3.91768	1.74546	5.69119	2.46438	6.81231	4.82302	4.36152	4.32753	2.64551	2.90121	3.39263	4.88905	3.04763	2.92199	2.95352	2.79977	3.81071	2.84283	3.51115	2.72293	2.64283	4.00158	3.23332	3.74603
GSE76427_GSM2011311	2.90879	2.52009	2.52751	2.46818	2.2427	2.75902	3.18466	4.30974	4.32218	2.63941	3.95079	2.93159	6.09993	2.474	6.08932	4.57637	5.12071	4.77331	2.54049	2.87375	3.96706	5.17198	2.9459	5.44176	3.75052	2.6882	3.78757	2.8483	4.88595	3.06457	2.4326	4.74394	2.98596	5.63421
GSE76427_GSM2011314	2.6602	3.10005	2.49461	3.13568	3.00639	3.01559	2.76858	1.94311	3.31979	2.64624	3.93174	2.76903	4.92779	2.52037	5.17414	5.12284	4.51285	7.27119	2.56477	2.90318	3.99926	4.9633	2.9491	5.30349	5.27403	3.50565	3.73982	2.9349	4.71698	2.3784	2.42783	3.2475	3.02734	5.56925
GSE76427_GSM2011317	4.4386	2.91932	2.94019	3.03026	2.47644	3.10875	2.75726	2.5894	3.07092	2.67682	3.9355	3.43666	4.72483	2.61847	6.41664	4.03065	3.5613	4.43888	2.3713	3.14571	3.90559	5.79883	3.39458	5.31854	4.42444	3.16034	3.66264	2.82761	5.31789	2.31229	2.64223	3.68464	3.53453	5.72008
GSE76427_GSM2011319	2.91202	3.27805	2.71591	3.14643	3.20701	3.05219	2.78298	2.81683	3.41245	2.70825	3.69691	2.42013	4.54356	2.8899	5.55827	4.27656	3.19909	4.5348	2.59299	2.56101	3.56452	4.71477	3.06954	4.63651	3.02072	2.80248	3.24316	2.7491	4.96403	2.96933	2.7065	3.1496	3.54204	5.95134
GSE76427_GSM2011320	2.79193	4.19242	3.33929	3.69535	2.62729	2.88088	2.99115	3.07946	3.21486	2.8479	3.51822	5.02155	5.56072	2.55367	5.35368	5.27518	4.0878	4.20933	2.81585	3.28616	5.01839	4.44671	2.42264	4.9803	4.34914	2.56214	3.64913	2.90402	4.72958	2.45623	2.73751	3.10832	2.90608	5.72979
GSE76427_GSM2011323	4.33197	2.73672	2.30701	2.64223	2.88616	3.19093	2.96035	2.75566	3.46499	2.76115	2.70144	2.19703	5.62859	3.03295	6.25433	4.49218	4.08298	3.98228	2.78776	2.91357	3.68545	4.07212	3.0981	3.76293	3.32667	2.53918	3.77543	2.86272	3.69133	2.33306	2.52327	5.4772	3.4872	5.80899
GSE76427_GSM2011327	2.50185	2.57256	2.86852	2.87002	3.12634	3.08351	2.92495	2.80589	3.40377	2.54928	3.54829	2.83034	5.58297	2.73447	6.80084	3.36163	3.86147	4.87247	2.16652	2.91246	2.62802	4.55107	3.27266	3.7315	3.04041	2.7173	3.35885	2.65648	4.42266	2.91864	2.52838	3.08368	3.33748	5.61329
GSE76427_GSM2011328	2.86752	3.52377	2.20719	3.40681	2.94511	2.94447	2.54634	3.47843	3.33233	2.48212	4.18659	2.4878	6.00782	2.69347	7.10781	4.85114	3.96464	3.99671	2.59548	3.33173	3.15337	5.21982	3.53075	4.47128	3.1146	2.96981	3.614	2.72292	4.68664	3.0529	2.42322	2.9662	3.28194	5.81483
GSE76427_GSM2011329	3.65015	2.12066	2.6988	2.79996	3.02242	2.82	2.9245	3.77243	2.85457	2.64356	3.01383	2.20019	6.20069	2.37567	7.3622	4.1436	3.84789	4.87542	2.71988	2.97459	2.82435	4.42215	3.24557	2.84279	3.60201	2.59834	3.61228	2.54657	4.46752	2.95449	2.51744	6.00495	3.45335	4.16483
GSE76427_GSM2011332	2.97177	2.04737	2.0882	3.67014	3.4391	2.6531	2.5681	2.91364	3.62822	2.70248	4.49798	2.78112	4.92779	2.96406	5.71018	5.53186	3.57203	3.81641	2.74172	3.25383	3.91833	5.52114	3.15972	5.55964	2.76446	2.87831	3.74587	3.16898	4.96861	2.15062	2.52205	3.12946	2.99213	4.86689
GSE76427_GSM2011333	3.3245	3.29906	2.74899	2.84758	2.95157	2.95231	3.06256	2.83784	3.52203	2.6737	3.33806	5.3698	5.67064	2.62651	5.40071	3.50435	3.76943	4.70015	2.0837	2.84954	4.34274	4.45833	3.03462	4.4295	3.51519	2.894	3.04195	2.97283	4.46523	2.6714	2.47953	4.00802	3.43803	5.62995
GSE76427_GSM2011336	2.94428	3.65023	2.94119	3.61708	3.05269	3.301	2.8605	2.87952	3.24485	2.55951	3.67352	3.47827	5.75014	2.50937	6.67459	4.33925	3.63125	3.8699	2.79972	3.5695	3.93863	5.08829	2.68415	4.35415	3.20967	3.85562	3.47446	2.795	5.93148	3.02414	2.56799	3.34345	3.37997	4.98985
GSE76427_GSM2011337	3.28615	3.0503	2.79108	3.16009	2.60589	2.86101	2.61168	1.94053	3.39559	2.55038	4.3123	2.12115	5.60844	2.72368	6.47465	3.91478	4.97348	4.93207	1.97989	2.26326	3.61651	4.77843	3.40171	5.11073	3.9142	2.74963	3.31026	2.73265	4.66807	2.5539	2.41852	2.44711	3.1736	6.10482
GSE76427_GSM2011338	3.29858	2.68508	3.00467	3.09788	2.90237	2.7819	2.52945	3.38799	3.71735	2.6352	4.29084	2.33483	5.98568	2.72793	5.92125	4.62857	3.54956	4.14541	2.72845	3.6422	4.23985	5.22067	2.8342	5.3013	4.31011	3.29003	3.56141	3.30278	4.93294	2.29535	2.35509	2.77284	3.19386	5.59385
GSE76427_GSM2011339	3.00091	2.98982	2.7007	3.38147	2.37776	2.84012	2.94379	3.44813	3.42376	2.80245	3.91049	2.60926	5.94133	2.66729	7.30358	5.72909	4.80214	4.44164	2.66015	3.11244	3.17822	3.97078	3.49845	4.08394	4.12032	3.97166	4.50561	2.69478	4.52281	2.54255	2.53559	3.57983	2.99306	4.75555
GSE76427_GSM2011341	3.71257	2.24541	2.56834	2.57127	2.57699	2.62539	2.80825	2.80932	3.49261	2.63013	2.56759	2.51216	4.90865	2.97699	7.47118	3.87026	3.25086	4.59088	2.51265	2.97484	3.07545	4.24986	2.99648	3.12015	3.3863	2.79764	2.77822	2.80384	-0.393767	2.62122	2.49765	3.24661	4.43634	5.00345
GSE76427_GSM2011348	3.45164	2.9328	2.44391	2.79681	2.93319	2.7732	3.06906	3.04	2.72392	2.64587	2.74481	2.95575	5.16705	2.58592	6.78691	4.35139	4.47057	4.16589	4.16954	3.19717	3.43692	4.11844	2.77549	3.68821	4.9575	2.75764	3.6283	2.83514	5.28376	2.5622	2.47882	3.23717	3.42216	5.33418
GSE76427_GSM2011350	3.06749	4.87038	4.0324	4.16675	3.7025	3.07132	3.00072	3.8817	2.91502	2.60601	5.42502	4.25126	5.18748	2.82137	6.31066	4.39499	3.07692	3.83644	2.7203	2.70061	4.89371	5.56354	2.76608	4.91628	3.56123	2.5868	3.57761	2.95977	4.17847	2.78357	2.33703	3.72025	3.2542	5.24036
GSE76427_GSM2011352	2.79317	4.49444	4.1563	4.67157	3.32235	3.44923	3.96408	3.21183	3.9524	3.06339	5.61786	4.99616	4.65239	3.06004	6.09131	5.68699	4.17959	4.68376	2.74473	4.3143	6.55947	7.4163	3.73475	7.46037	5.0115	3.88061	4.6889	3.91621	6.38547	3.12839	2.52072	3.32462	4.10977	6.00117
GSE76427_GSM2011356	3.54185	3.5202	2.67227	3.15941	2.80333	-0.137174	3.02303	3.09963	3.66028	2.6787	3.19785	2.91538	6.26575	2.80952	5.9114	4.44733	3.40457	4.68066	2.66417	2.65393	3.67246	3.77549	3.72989	3.62058	4.77772	2.56376	4.12826	2.78627	4.82379	2.8056	2.69558	5.26986	3.11015	4.76482
GSE76427_GSM2011357	5.75061	3.12843	2.6066	3.1141	2.56193	3.18586	3.07295	1.78289	3.1425	2.48768	2.82155	3.63552	5.24657	2.64799	6.8878	4.72083	3.89195	6.15825	2.47342	2.75737	3.77493	3.52423	3.87521	4.76872	3.7003	3.01181	3.27415	2.98035	3.71969	3.17493	2.4414	4.92878	3.51222	5.55445
GSE76427_GSM2011358	3.46993	3.26143	2.38226	3.13154	2.50916	3.12462	3.45953	2.77366	3.19224	2.75751	3.21375	3.84378	5.37178	2.69323	7.27513	5.30641	4.07666	4.54664	2.46673	3.19315	4.32309	4.38612	3.77769	5.20677	3.81934	3.50363	3.56024	3.10618	4.154	2.55684	2.50861	4.8671	2.58852	5.68794
GSE76427_GSM2011359	3.96864	2.39203	2.3056	2.83959	2.93533	2.87381	2.86141	2.90686	3.28968	2.52647	2.22434	2.41325	5.12816	2.70307	6.9263	3.48276	3.53509	4.2488	2.4233	3.00528	2.98235	4.3739	3.01169	3.3418	3.38472	2.59994	3.09851	2.79743	3.736	2.87151	2.4984	3.20263	4.7018	4.56603
GSE76427_GSM2011360	3.78892	4.54816	3.33453	5.12888	3.25946	3.01142	4.17187	2.2671	3.27116	2.7373	4.48756	4.49679	4.3897	2.86761	5.51157	5.39132	5.00538	3.91884	2.66213	3.17117	6.5376	5.73797	3.51184	6.69533	4.82999	3.70868	5.06781	3.6951	5.78653	2.72795	2.36464	4.58441	3.90062	5.56378
GSE76427_GSM2011361	3.20881	4.2029	3.35438	4.08404	3.19194	1.25258	4.12382	2.90973	3.14475	2.852	4.20182	4.96485	4.94644	3.69808	5.82208	5.79278	4.96157	4.34393	1.71609	3.70003	6.2261	5.79883	3.71902	6.42654	4.06549	3.51708	3.94932	2.83183	5.73106	2.84067	2.45909	3.95519	3.09241	5.47015
GSE76427_GSM2011365	2.91479	3.08783	2.68359	3.29902	2.9287	2.78233	2.78477	3.94051	3.16463	2.62856	4.22183	2.71256	5.22568	2.72392	6.27642	3.98526	3.6593	4.15781	2.76306	3.41728	4.27985	4.79288	3.31966	5.51256	4.3779	3.66447	4.02964	3.25088	5.5145	2.66304	2.55544	3.26043	4.19302	5.74114
GSE76427_GSM2011367	3.09679	2.82315	2.8449	3.06462	2.7675	2.96497	2.94833	2.45341	3.8028	2.60809	3.46487	2.92371	5.12816	2.89675	6.59374	4.41738	4.93183	4.95288	3.04293	2.55499	3.52854	4.4288	3.0508	4.45477	4.11739	2.84171	3.21763	3.07204	4.47975	2.25407	2.51563	3.92479	4.19534	5.72324
GSE76427_GSM2011368	3.48923	2.57204	2.64181	2.84483	2.71022	2.41378	2.51751	2.79464	3.16083	2.51097	3.4178	2.95424	4.80571	2.54392	6.30541	6.19668	2.63098	4.32107	2.23082	2.03923	3.01387	4.2637	2.52943	3.86561	3.24777	2.65835	4.29107	3.06914	4.24576	2.42207	2.43691	3.21622	3.09665	5.21623
GSE76427_GSM2011371	2.73462	2.63921	2.81411	2.83419	2.69419	2.8638	2.9698	2.99695	4.20204	2.50219	3.42372	2.75927	4.37307	2.57322	4.24848	3.84472	2.63393	3.81509	2.6262	2.72311	3.3925	4.65191	2.73884	3.8441	3.57086	2.88154	3.50374	2.23869	4.3723	2.91713	2.54882	3.32309	3.30754	4.81305
GSE76427_GSM2011374	2.98734	2.8301	2.57832	2.86017	3.1364	3.2658	2.89518	2.8706	2.94429	2.71185	3.32912	2.99962	6.3199	3.01721	6.34426	5.42852	3.96104	3.60799	3.48559	2.47594	3.28027	4.13021	3.02092	3.92241	3.38588	2.99148	3.48508	3.12083	4.17362	2.32583	2.49931	5.47147	4.14537	4.87678
GSE76427_GSM2011375	2.5656	4.2048	2.97714	4.0988	3.5823	2.99126	3.72649	3.07688	3.49261	2.70764	4.84386	3.62772	4.82532	2.33275	5.34084	4.38594	3.54857	5.1782	2.30219	3.09033	5.17866	5.74848	3.32543	5.49825	3.77296	2.65172	3.74529	3.008	5.10777	2.61065	2.31177	3.48221	3.47091	5.28058
GSE76427_GSM2011376	3.68118	3.15035	2.76581	3.23512	2.9371	3.21453	2.95576	3.05394	3.58526	2.49899	3.76078	3.01444	4.54356	2.38155	5.93371	5.46399	3.93192	4.58651	2.91443	3.24373	3.81014	4.88751	3.45673	4.27705	3.34421	2.99966	3.14313	0.830777	5.29418	2.25112	2.76188	3.05004	3.83292	6.18942
GSE76427_GSM2011379	3.53948	3.53123	3.09054	3.61976	3.62209	3.12292	3.69746	2.2014	3.39612	2.64611	4.41217	3.72853	5.06707	2.81751	6.71323	5.31392	4.16252	4.43498	2.02361	3.3616	4.76005	5.2462	3.22843	6.27371	3.93458	3.80271	3.62433	3.21068	5.77446	2.60508	2.13955	4.47588	3.33371	5.73302
GSE76427_GSM2011381	2.62919	2.97765	2.71662	2.8451	2.90489	2.6455	2.73154	3.07274	3.12715	3.08966	3.45324	3.09805	5.75014	2.75807	5.9744	4.78928	4.2462	3.78573	3.00276	2.3363	3.55199	4.45585	2.64431	4.4436	3.97869	3.4214	3.14757	2.95291	5.51586	2.53903	2.66224	3.3348	3.45445	5.22232
GSE76427_GSM2011384	4.82279	2.53433	2.45718	2.77704	3.0758	2.77122	2.70779	3.03194	3.40198	2.88344	3.48825	2.67112	5.42878	2.50691	6.10098	4.01063	3.94384	3.95387	2.24404	2.86192	3.26314	4.50672	3.16761	3.70835	2.79863	2.49665	3.84011	2.83116	4.54738	2.40294	2.42205	3.66935	4.18546	4.80055
GSE76427_GSM2011386	6.02622	2.65448	2.99024	2.77047	2.73525	2.59481	3.39514	3.17839	3.50807	2.61613	3.36674	2.74218	6.36813	2.84027	5.81549	3.73226	3.80988	5.51694	2.29028	2.52443	3.27878	4.34392	3.00631	4.23539	4.79915	2.98653	3.02866	2.85566	5.01552	2.64836	2.70819	5.98684	3.48253	4.75366
GSE76427_GSM2011387	4.00942	2.31779	2.60894	2.63692	2.78537	2.14471	2.37495	3.66511	3.73326	2.74114	3.15037	2.40674	5.71287	2.67687	4.95325	3.74528	2.94701	3.66731	2.77171	2.33556	2.86145	4.27953	2.98573	2.97428	5.09649	2.55542	3.29247	2.64002	3.79745	2.39579	2.5472	3.08958	3.13963	3.71153
GSE76427_GSM2011388	3.54944	2.48808	2.69185	2.78315	2.85308	2.25658	2.66754	3.05837	3.13607	2.67651	3.23383	2.70121	6.15222	2.6432	6.10205	3.8891	3.72424	3.93153	2.5283	3.33958	3.10823	4.43319	3.05091	3.4413	3.3267	2.74534	3.6518	2.53447	3.99221	2.5137	2.31186	3.85746	3.42294	4.93853
GSE76427_GSM2011389	2.62746	2.45285	2.71418	2.71672	2.77458	2.73917	2.50432	2.92339	3.71554	2.50331	3.15694	2.76625	3.64058	2.75821	5.53064	5.44747	2.53174	3.91915	2.66228	2.38742	2.8721	4.25236	2.52226	3.27249	2.75962	2.82473	3.44304	2.62053	3.85441	2.83059	2.49614	3.37581	2.92382	4.81552
GSE76427_GSM2011390	5.1963	3.71438	2.98311	3.51119	2.96489	3.18544	3.49586	3.43228	3.46645	2.7968	3.79262	4.23959	5.04983	2.66461	6.35095	4.73466	4.0878	3.62988	2.35044	3.48392	5.61826	5.15351	3.04663	5.42886	3.68862	3.70539	3.43193	2.78968	5.11585	2.52055	2.4839	3.19982	3.12456	5.9112
GSE76427_GSM2011392	3.74671	3.42465	2.84702	2.95032	2.7022	2.43055	2.99654	2.64889	3.60373	2.62724	4.2802	3.36626	6.03345	2.49408	5.64312	4.12378	3.25888	5.33123	2.45444	3.32886	4.18942	4.2409	3.33029	4.27385	3.32733	2.53834	3.21922	2.74953	4.60327	2.65544	2.43468	4.63717	2.47175	4.19417
GSE76427_GSM2011394	2.75632	2.75328	2.58931	2.63462	2.76671	2.80776	2.73939	2.40106	3.93162	2.37902	3.35265	2.46584	4.09904	2.86642	6.11875	4.15675	3.19496	4.34079	2.34348	2.87475	2.99934	4.31567	2.69885	3.59768	2.99047	3.16304	3.45877	2.81657	4.12529	2.54486	2.45828	3.50378	3.1759	5.37916
GSE76427_GSM2011395	3.0606	2.8508	3.13779	3.46572	2.78112	2.61382	2.97374	3.91251	3.17628	2.53571	3.73266	3.22023	5.94133	2.8127	6.22619	4.28366	3.72503	3.6072	2.21357	3.06274	3.99291	4.67558	3.44747	4.76758	4.42216	3.00335	3.80519	3.15751	5.72825	2.32745	2.38195	3.12401	3.13365	5.44707
GSE76427_GSM2011396	3.33312	3.82529	2.79367	3.48058	3.15878	2.76876	3.42588	2.51061	3.57482	2.64259	4.26577	3.09427	5.24657	2.64481	5.50632	4.19476	5.04068	4.10589	2.6447	3.13357	4.09798	5.24378	3.21747	6.1224	3.99734	3.73598	3.58873	3.04915	5.90887	2.88512	2.57185	3.37515	4.23964	6.50801
GSE76427_GSM2011397	2.47232	2.51631	2.83835	2.6031	2.86087	2.89697	2.7364	3.74464	3.34634	2.7116	3.19556	2.55113	3.89895	2.59864	5.37063	3.83203	3.8776	4.34738	2.50506	2.92166	3.1923	4.58214	3.05285	3.2358	4.17076	2.27083	3.33093	2.62544	3.85705	2.50171	2.40994	3.25469	2.83692	5.01851
GSE76427_GSM2011399	3.0142	2.27212	2.8872	2.89414	2.42049	2.91621	2.5692	2.85431	3.35809	2.61166	3.38691	2.83003	5.7965	2.89084	6.4106	5.59473	2.92209	4.33133	2.61184	3.06601	2.95454	4.45868	3.081	3.51767	3.96125	2.80208	3.11065	2.29275	4.27261	2.80742	2.40248	3.80273	3.31995	4.84497
ICGC_DO227643	2.75711	2.9202	2.55682	2.75406	2.58109	3.14952	2.87239	2.60249	3.65601	2.55978	3.10066	3.32497	4.45854	2.56239	7.12427	3.49637	3.0527	4.74946	2.68275	3.49369	4.17714	3.98432	2.75582	4.44979	3.5901	3.01806	3.71418	3.91874	3.91527	2.61975	2.80149	4.13726	2.80563	4.79377
ICGC_DO227801	3.15646	3.71088	3.14716	3.68164	2.93844	2.93638	3.25278	3.19194	3.1149	2.70118	3.74662	3.60565	5.19294	2.82457	6.32575	5.58102	3.9378	4.10557	2.44392	3.09662	4.82035	4.82748	3.66916	5.17625	3.89212	3.41328	3.93226	3.06733	4.88056	2.42647	2.57325	3.32541	3.94089	5.54835
ICGC_DO23512	3.65459	2.5943	2.51634	2.72059	2.57	2.47948	2.73617	2.66983	3.56016	2.76408	3.19459	2.75112	4.63988	2.55373	5.94761	4.28739	3.00962	4.23535	2.57331	3.32273	3.6256	4.76486	2.55803	3.46744	3.52508	2.59774	4.25168	3.30255	3.42828	2.44924	2.57192	4.27659	2.47601	4.3964
ICGC_DO23515	2.70468	3.35755	2.75722	3.3502	2.93733	2.83462	3.12424	2.89613	3.1018	2.73507	4.11421	3.04375	5.61145	2.81119	5.52332	5.9704	4.80012	5.88118	2.50788	2.76677	4.3222	5.22793	2.94904	5.3179	4.01357	3.32314	4.8964	2.71308	4.7363	2.65763	2.45141	5.49964	4.0005	5.62445
ICGC_DO23516	2.5895	2.19355	2.55829	2.65474	2.68253	2.19375	2.56478	4.9161	3.65033	2.55988	2.87185	2.22684	4.19491	2.64823	5.69808	5.06653	3.55053	5.11073	2.52584	2.51486	3.06382	3.28249	2.73001	2.7663	3.49352	2.49797	3.67615	3.21779	2.80349	2.72163	2.45154	4.43052	3.02119	6.35918
ICGC_DO23517	3.14325	2.51488	2.59092	2.84442	2.75244	2.60874	2.85217	2.78608	3.89739	2.55976	3.18144	2.7462	4.10425	2.53141	6.04734	4.78465	3.25536	4.34408	2.47356	3.1116	3.06567	3.46497	2.73143	3.81059	3.38079	2.58832	3.93483	2.89182	3.84747	2.411	2.52481	3.02154	2.76547	4.09615
ICGC_DO23518	6.21942	3.42619	3.2027	3.44903	2.9205	3.80417	2.85673	3.06894	3.31731	2.72409	3.62122	3.61192	4.97376	2.79707	7.16713	4.03652	3.81038	4.63288	2.50564	2.91976	3.79052	4.37439	2.99586	4.67614	3.56285	2.91642	3.31266	2.66869	4.42296	2.49687	2.45141	3.82658	3.83439	4.63521
ICGC_DO23525	2.94051	3.4783	2.66999	3.32627	2.88141	3.60421	3.24911	2.63447	3.46479	2.71604	4.29665	3.58684	5.94932	2.75416	7.34018	6.57062	4.61458	4.08251	2.5534	2.89149	4.11466	5.06606	3.55631	4.77272	3.48803	2.93067	3.43308	3.39473	4.46389	2.72986	2.45141	3.52713	2.94371	4.83792
ICGC_DO23526	3.12631	2.87668	2.66341	2.76742	2.56871	2.21922	2.84032	2.95898	2.98945	2.60596	2.90283	3.25909	5.12382	2.6407	5.99957	3.57149	3.9895	4.20758	3.02869	2.58139	3.54617	6.56997	2.43911	3.26786	4.38118	2.44302	3.97717	2.5656	3.67596	2.60575	2.45141	5.18269	3.23891	5.60247
ICGC_DO23527	2.96646	2.76044	3.3056	3.28815	2.81835	3.98131	3.06398	2.66848	3.23302	2.68981	3.86186	3.16483	5.38704	2.62578	6.46852	4.93669	3.4199	4.54059	2.4795	3.3569	3.86919	4.66482	3.23596	5.08019	3.50896	3.173	3.94311	2.60283	5.12963	2.42015	2.57339	3.77529	3.39173	5.76949
ICGC_DO23528	3.10191	2.34735	2.48765	2.56883	2.57314	2.21086	2.56465	2.61007	4.38768	2.74231	2.86915	2.38194	4.18159	2.58141	6.51849	5.62889	3.21327	5.0434	2.46931	2.52409	2.88541	3.45313	2.63122	3.27133	3.12144	2.87078	4.20421	2.97052	2.9787	2.57169	2.45141	6.00527	3.55307	4.97179
ICGC_DO23530	3.02288	5.13992	4.29253	5.33797	3.30303	4.06929	3.52927	3.62636	3.83413	2.79564	5.49595	5.29667	6.53441	3.25643	5.14381	3.6853	5.33931	4.19566	2.50221	3.00326	6.2211	5.99276	4.73081	6.9858	4.67345	3.64706	3.65398	2.54127	7.1006	2.50272	2.50713	3.00766	5.42742	6.48063
ICGC_DO23531	3.64213	3.24948	2.96837	3.8216	2.98864	3.79717	3.13996	2.99972	3.43872	2.63189	4.13399	3.25207	5.23327	2.69664	6.95695	3.59702	3.25414	4.20188	2.51154	3.78243	4.73271	4.89324	3.76291	5.87553	3.43248	3.86479	3.91996	3.02633	5.26233	2.55367	2.60242	3.16162	2.85715	5.94446
ICGC_DO23532	3.17231	2.27255	2.41171	2.63885	2.56735	2.89316	2.67388	2.56201	3.98875	2.66329	2.87718	2.59364	4.91219	2.57449	5.58954	4.75537	2.81537	4.31811	2.69054	3.6293	2.85776	4.61955	2.53931	3.38445	4.41548	2.64138	4.3385	3.67873	3.47024	2.32906	2.45141	3.45743	2.22357	3.84041
ICGC_DO23533	3.1715	2.49635	2.47807	2.59262	2.52876	2.09771	2.69824	3.13679	3.31942	2.65216	2.57429	2.33357	4.19095	2.58454	6.36402	4.08831	3.3203	4.99184	2.76039	2.48699	3.38057	4.36914	2.73273	2.7286	3.25488	2.55343	3.68978	2.7487	2.89901	2.90217	2.45141	4.7035	3.36361	4.52057
ICGC_DO23534	2.58771	2.52696	2.74604	2.6089	2.53529	2.34818	2.82186	2.66687	3.2326	2.6507	2.45592	2.40148	4.15394	2.62385	5.7161	3.76206	3.00377	5.69091	2.51405	2.46967	3.93313	3.57004	3.48386	2.94161	4.13716	2.3177	4.80641	2.63804	2.36703	2.48026	2.67408	4.58268	2.71478	5.17613
ICGC_DO23535	4.65478	3.29859	2.7336	3.01078	3.45466	3.27603	3.06921	2.79677	3.73449	2.66955	4.89544	2.89435	7.00453	2.75156	6.48955	4.36543	3.67734	3.72009	2.43087	2.68721	3.72529	6.13882	2.87984	5.62403	3.81322	2.99756	3.52608	2.52418	5.67074	2.71849	2.73343	3.48131	4.28425	6.02731
ICGC_DO23536	2.25813	2.814	3.80438	3.24576	2.97653	3.46359	3.17136	2.8277	3.41305	2.70616	3.90392	3.55403	5.18409	2.54199	6.6356	4.52287	3.44195	5.02823	2.65759	3.52279	3.62086	4.74637	2.72777	5.078	3.17079	2.53387	3.37361	3.09494	4.13905	2.48241	2.45141	4.01407	3.49363	6.0587
ICGC_DO23537	4.06261	2.38696	2.64124	2.64498	2.88433	2.51732	2.65752	2.58288	3.61797	2.55976	3.83471	2.36878	6.15988	2.56527	5.59061	5.34889	4.24107	7.00119	2.47343	2.587	2.74509	4.15232	3.27954	3.20003	3.1668	2.61897	3.43878	2.50749	3.84951	2.87548	2.45141	4.12403	3.69642	5.85428
ICGC_DO23538	2.98397	2.488	2.60828	2.71674	2.80153	3.12292	3.0303	2.72316	3.07699	2.55976	3.59108	2.59544	4.5293	2.58058	6.04999	4.64374	2.55242	3.95219	2.42632	3.05958	2.80185	4.00073	3.00426	4.0861	2.65697	2.58155	3.58883	3.12887	3.90725	3.04524	2.76458	4.4052	2.39853	4.57544
ICGC_DO23539	3.77908	3.08468	2.69639	3.12306	2.75095	2.55411	3.03539	2.60767	3.956	2.55976	3.35639	3.26086	4.99673	2.93304	8.1195	4.04863	3.85369	4.59579	2.76506	2.65354	3.22586	4.66037	3.01202	3.52194	4.44827	2.88513	3.16455	2.91402	5.20173	2.65002	2.45141	3.44602	3.53466	5.82322
ICGC_DO23541	2.76026	3.76254	2.92117	3.44404	3.44503	3.2754	3.40686	2.92747	3.04613	2.61628	4.34003	2.70657	5.47378	2.7944	5.96145	4.17644	3.84983	4.39904	2.60337	2.74882	3.702	4.67003	3.19396	4.96126	3.43399	3.08421	3.00977	3.02191	5.17918	2.79295	2.45141	4.20965	4.47358	5.0364
ICGC_DO23543	2.76932	3.68812	2.86481	3.77042	3.07071	3.54594	3.36385	3.13146	3.29947	2.75483	4.69558	3.6801	6.36428	2.75547	5.26638	4.92896	3.96636	3.27963	2.58152	3.50366	5.02129	5.36993	3.12393	6.00266	3.77659	3.3784	3.4693	3.0248	6.10022	2.53108	2.45141	3.23571	3.11331	4.48544
ICGC_DO23544	3.74011	2.82571	2.64031	3.09289	3.18631	2.55533	3.02168	2.56123	3.14338	2.78431	3.13051	3.24466	4.8871	2.56418	6.00344	4.6234	3.44248	3.86444	2.49624	3.34933	3.06567	4.30829	3.0499	4.46366	3.91226	3.2151	3.00564	3.26905	5.5884	2.41019	2.85325	2.63321	2.87094	6.29028
ICGC_DO23545	2.87232	2.95818	2.47952	2.9025	2.87601	2.34818	2.98142	2.81551	2.91081	2.55976	3.57662	2.43322	4.78862	2.51404	6.69975	5.93021	3.87417	4.2284	2.55014	2.96603	3.55287	4.59038	2.99808	3.87193	3.33055	2.65328	3.88994	2.41365	3.72383	2.65112	2.45141	3.45309	3.35266	4.64489
ICGC_DO23546	2.94913	3.71912	2.62974	3.49071	2.96353	2.95876	3.53445	3.49355	3.36016	2.55976	4.13623	3.0129	5.30699	2.5408	5.81021	4.80404	4.34285	5.09153	2.5228	3.29084	3.96622	6.29021	3.58332	5.02731	5.32487	3.25045	3.75495	2.92003	5.1045	2.41162	2.45141	3.34356	3.26381	5.21
ICGC_DO23547	2.95429	4.47778	3.56561	3.22165	3.50586	3.285	4.47575	4.7445	3.43493	2.60321	5.73599	3.53417	7.96676	3.41959	6.34095	4.65159	5.06233	4.55111	2.47384	3.03091	4.23731	7.46576	3.46338	5.80323	5.70577	3.04262	3.12283	2.80891	7.68035	2.64682	2.48309	5.53775	4.96124	6.88515
ICGC_DO23548	4.29237	3.88388	2.90362	3.57126	2.85919	2.70121	3.33229	2.97748	3.52188	2.6221	3.58545	4.52691	5.31917	2.89236	6.60532	4.07644	4.12775	6.8785	2.51332	3.27893	5.82881	4.54933	2.87587	4.85506	4.0574	2.84708	4.02509	3.01599	4.9523	2.44038	2.61721	3.02944	3.36251	5.52229
ICGC_DO23549	3.79162	5.93228	4.88877	4.81144	3.74606	3.74839	5.47217	4.82768	3.11911	2.60432	4.86024	7.61846	6.63717	3.33705	6.42597	4.15142	5.13772	3.26938	2.50693	5.00688	7.19227	6.09379	3.96092	6.40073	4.33166	3.29997	4.01551	4.31381	5.49754	2.53815	2.58087	3.65357	3.69967	5.80103
ICGC_DO23550	2.98832	3.50426	2.94609	3.32023	3.39673	3.75273	3.21266	2.79308	3.3455	2.95105	4.66355	3.62294	5.32248	2.82492	6.59847	3.91124	3.46465	3.40411	2.42632	3.69731	4.41086	5.0371	2.99708	5.38039	3.16041	2.84073	3.84603	3.67007	5.22851	2.69068	2.45141	3.00365	3.09989	5.00807
ICGC_DO23551	3.08423	2.77866	3.04399	2.91586	3.63739	3.86478	2.56465	3.44218	3.23387	2.98167	4.62633	2.8677	5.32878	2.56009	6.07527	4.22883	3.34189	4.88284	2.49	3.93179	3.1164	5.17619	3.06311	5.45492	3.0634	2.68579	3.14514	3.4059	5.24088	3.48898	2.45141	2.67999	3.09084	6.69968
ICGC_DO23552	3.45389	2.37107	2.46089	2.71685	2.67132	2.41778	2.68652	2.72677	3.63991	2.61035	3.20054	2.31424	4.37137	2.47423	6.64016	4.84757	3.28141	6.66832	2.4567	2.45513	2.41391	3.76883	3.0615	3.6762	2.78681	2.78694	3.03012	2.48539	3.72583	2.49696	2.45141	3.49046	2.94105	4.66295
ICGC_DO45094	3.14532	2.52744	2.76092	2.96457	2.62013	3.43212	3.24148	2.63497	3.27061	2.79957	3.84911	3.10937	5.54603	2.7172	5.74378	5.55263	3.23649	4.14503	2.42632	3.18804	3.97074	4.90417	2.92058	4.45563	3.64356	3.01959	3.98126	3.35913	4.67001	2.44716	2.45141	3.5918	3.23723	5.11489
ICGC_DO45095	3.44498	4.13444	3.02171	3.89035	2.72434	2.87498	3.83319	3.16122	3.14104	2.55976	3.98592	3.91173	5.70778	2.95407	6.04171	3.58121	5.00957	5.05621	2.52	3.21112	5.97359	5.51415	3.51793	6.31938	5.1234	3.96432	3.7585	2.93246	6.03138	2.5266	2.46816	3.79835	4.88077	4.77698
ICGC_DO45097	2.86165	2.43957	2.58889	2.708	2.67143	2.15651	2.56477	2.76907	3.93428	2.83402	2.93093	2.4291	4.37086	2.74036	7.24463	5.86595	4.10874	5.3672	2.4264	2.45846	3.44885	4.01488	2.84102	3.40862	3.5301	2.28448	3.34522	2.57599	5.36989	2.32916	2.45153	3.49283	3.40381	5.61234
ICGC_DO45099	3.17551	2.59158	2.49596	2.90992	2.49695	2.49104	2.64685	2.63414	3.79617	2.63316	3.1291	2.69973	4.80766	2.54601	6.28495	4.52669	3.68757	0.761303	2.4779	2.63788	3.21411	4.16301	3.08849	4.23815	3.80833	3.20367	3.64633	2.82011	3.88725	2.49171	2.57517	3.3246	3.71469	5.05679
ICGC_DO45101	3.74952	3.17191	2.60177	3.04004	2.9629	2.84176	3.40751	3.10308	3.95316	2.55978	3.40192	3.36317	4.90322	2.68832	6.97247	3.92463	3.32686	2.92288	2.48918	3.51282	3.26605	4.48899	2.63432	3.61375	3.80463	2.48282	3.79984	3.09133	3.58001	2.32908	2.45142	3.34272	2.3348	4.69004
ICGC_DO45103	3.11818	3.31392	2.56793	3.08133	2.76032	2.60514	3.39939	3.24605	3.08851	2.55976	3.66155	2.72738	5.51358	2.66048	6.28754	5.71503	5.18893	4.73385	2.45976	2.62595	3.54434	5.22577	3.09355	5.21456	5.1981	3.21722	3.6328	2.71575	5.83943	2.6943	2.45141	4.05433	5.56738	6.43926
ICGC_DO45105	3.39654	3.01217	2.54627	2.63198	2.58694	2.45275	2.73574	2.63999	3.00178	2.55979	2.81045	2.99925	4.65716	2.61541	7.46006	5.58872	3.47829	7.11937	2.51667	2.80492	2.82081	4.31148	2.5894	3.02491	4.20243	2.71331	3.09361	3.33155	2.89705	2.32908	2.45143	4.10865	2.60153	4.42924
ICGC_DO45107	3.07999	2.40225	2.50488	2.71023	2.73723	3.27603	2.72868	2.50342	3.53733	2.55976	3.21977	2.69362	4.4912	2.55075	4.83224	3.78338	2.92154	6.39611	2.51594	3.45348	3.07762	4.03287	2.44287	3.20439	4.41016	2.61295	4.02866	3.45737	3.21904	2.56982	2.99844	4.08193	2.36143	3.35232
ICGC_DO45109	3.14028	3.25989	2.56042	3.10723	2.75109	2.8293	3.16016	2.69835	3.33312	2.62272	3.82272	2.96483	5.7732	2.7335	6.31692	5.3817	4.45155	2.12972	2.52781	2.93632	3.92432	5.26314	3.22838	5.26946	4.68892	3.50061	3.38142	2.89661	5.05315	2.38028	2.45141	3.37546	4.68688	5.43141
ICGC_DO45115	4.02182	3.70388	3.87847	3.94899	2.90166	3.79884	3.75588	3.2641	3.22859	2.73025	4.51938	5.45474	6.08619	2.78999	6.9343	4.14024	4.26387	3.62614	2.71468	3.23268	5.30888	5.08416	3.61383	5.20062	3.89069	3.3049	3.53628	2.99442	4.60317	2.52341	2.45141	3.72158	3.17717	5.15437
ICGC_DO45125	3.03615	2.40814	2.43332	2.68201	2.54794	2.46154	2.71152	3.45501	3.59239	2.63565	2.834	2.3894	4.48001	2.66409	5.12509	4.17419	3.89405	2.00031	2.53591	2.80749	2.45115	3.9669	2.71058	3.1618	4.55573	3.02943	3.6299	2.83817	3.07941	2.37611	2.45141	3.78948	3.08974	4.48958
ICGC_DO45129	3.36833	2.53496	2.61654	2.65505	2.85358	2.56811	2.56465	2.63267	3.57587	2.73091	3.23486	2.39256	4.3914	2.53595	6.34264	6.21433	3.777	3.73933	2.59157	3.91688	2.89246	3.88717	3.06391	3.34354	2.93061	2.37549	3.5366	2.42735	3.75778	2.47995	2.45141	3.58781	3.68856	6.79428
ICGC_DO45133	2.97561	2.32311	3.42551	2.59483	2.72534	2.23986	2.56465	2.67098	3.70821	2.6827	2.7907	2.30562	4.33694	2.62715	5.89101	4.96026	3.33485	4.84083	2.42632	2.71403	3.15796	3.81612	2.70021	3.16355	3.0316	2.28437	3.1319	2.66351	2.93521	2.44001	2.62023	4.52655	2.98579	5.0778
ICGC_DO45141	3.26709	4.96412	3.07774	4.65402	3.20198	3.87012	3.37566	3.323	3.17359	2.6302	4.65673	4.46682	6.25369	2.93803	6.30656	5.72778	4.49892	4.24404	2.47953	3.35282	5.80658	5.8687	4.33614	6.75749	5.21044	4.82296	3.65168	2.98521	6.13817	2.705	2.45141	3.44288	4.98008	6.26294
ICGC_DO45149	2.90598	3.64183	2.73328	2.75095	2.98995	2.31828	3.32851	2.50559	2.90616	2.56219	3.4583	3.83073	6.06079	2.47652	6.02352	5.21905	4.56182	4.39969	2.42811	4.15302	3.37413	4.99112	2.94882	3.19828	5.28546	2.28675	3.01495	3.6768	3.01258	2.54885	2.45411	2.73214	2.48332	4.38584
ICGC_DO45153	6.02226	3.17933	2.88848	3.37947	2.97549	3.38477	3.42338	3.00168	3.64171	2.57507	4.25036	3.96764	6.54849	2.74447	6.85317	5.64883	3.80053	6.17132	2.47195	4.11581	4.44053	5.39492	3.28877	5.18183	3.85556	3.30981	3.46315	2.64847	5.37719	2.63646	2.45141	3.97119	4.11007	5.7917
ICGC_DO45159	3.01593	3.84099	3.3235	3.65135	3.31852	4.44519	3.3728	2.77276	3.53771	2.67467	4.14108	3.18541	5.56249	2.66569	7.08672	2.68964	4.47338	4.01594	2.48867	2.92325	4.15275	5.09916	3.58511	5.26383	4.04429	3.72532	3.59199	2.75594	5.29988	3.05598	2.45141	4.8872	4.07654	5.78108
ICGC_DO45163	2.74482	2.38482	2.70422	2.6464	2.87522	2.24751	3.02417	2.94528	3.29378	2.5598	3.17607	2.76298	4.50171	2.57655	5.72687	5.25107	3.40989	3.96328	2.42635	2.51486	3.2303	3.97443	3.3869	2.73888	3.20378	2.39763	3.70479	3.03416	2.8308	2.68095	2.45145	4.90415	2.58349	3.79963
ICGC_DO45167	2.75774	2.53969	2.41226	2.51632	2.97918	2.50008	2.88946	3.04354	3.10007	2.56019	3.14787	2.43032	4.86345	2.64501	6.08	4.97395	2.93124	6.32508	2.68484	3.48013	2.86224	4.79708	2.52705	3.40862	3.70079	2.28479	3.01192	3.47326	3.50865	2.73315	2.45188	3.42522	2.57943	5.83978
ICGC_DO45175	3.79816	2.19346	2.49025	2.51599	2.61135	2.83117	2.56465	2.50342	3.01043	2.72826	3.01866	2.50218	4.27877	2.58004	6.39822	3.79504	2.96769	5.18125	2.42632	2.54581	3.57556	3.52204	2.74188	2.82961	2.96453	2.39024	3.37417	2.39895	2.84994	2.83535	2.45141	4.38211	3.12855	5.04389
ICGC_DO45179	2.68229	2.33926	2.47019	2.63822	2.75511	2.67242	2.56465	2.58365	3.0725	2.67501	3.15034	2.36647	4.4317	2.57587	5.77341	5.46572	3.53638	4.99334	2.59167	2.69197	2.97572	4.39791	2.6027	3.63279	2.97709	2.50716	3.98674	3.06101	4.46109	2.81365	2.78845	4.06275	3.14273	5.03231
ICGC_DO45181	5.63506	4.39491	2.99887	4.30181	3.09416	3.55495	3.44289	3.00506	3.50823	2.65595	4.45965	4.15871	5.37821	2.78148	6.33044	4.76192	4.2416	3.8591	2.50733	3.30816	5.70459	5.70633	3.7974	6.15658	4.29297	3.66955	3.69942	2.79754	5.69124	2.55449	2.55547	3.31778	3.55088	5.29754
ICGC_DO45183	3.66809	2.67833	2.58295	2.74725	2.78058	2.6101	3.35937	2.50342	3.28367	2.7722	3.40222	2.59233	4.90894	2.58028	6.64377	3.76283	4.19951	4.26582	2.60839	2.68721	3.50948	4.22175	3.0075	4.53371	3.52859	3.60269	3.77006	3.0388	3.8463	2.52933	2.45141	6.78092	3.64702	5.26043
ICGC_DO45185	3.32144	2.89929	2.67146	2.92614	2.8355	2.2764	2.88988	2.70488	2.50954	2.64791	3.46359	2.67659	4.76577	2.59337	5.98733	5.05445	4.17238	3.08261	2.93718	2.49237	3.32054	5.40573	2.65992	3.86108	2.89686	2.47273	3.60801	2.68557	3.89338	2.42389	2.46055	5.85052	3.54362	5.7917
ICGC_DO45195	4.16162	2.39189	2.58317	2.65676	2.65478	2.39821	2.56465	2.78953	2.94185	2.55976	3.40773	2.70718	4.93008	2.60359	8.31808	4.11979	3.09355	3.63445	2.51282	3.18151	2.87886	4.17867	2.6005	3.8255	3.14889	2.62741	3.22098	3.32931	3.77247	2.38905	2.45141	3.36512	2.45985	5.86907
ICGC_DO45199	2.76844	3.2797	3.21569	3.4578	3.30805	3.45906	3.3124	2.88672	3.55876	2.86847	3.90658	3.74825	5.31434	2.76281	6.54212	5.95173	4.08368	6.26662	2.42634	3.05983	3.9557	4.8138	3.5641	4.7654	3.22544	3.0517	4.04187	3.00596	3.9009	2.69825	2.45144	3.36553	3.63403	5.51372
ICGC_DO45201	2.6739	2.64355	2.56331	2.85379	2.93801	3.10696	3.00168	3.37638	3.61539	2.7374	4.30474	2.49362	5.94907	2.68857	5.92375	4.45868	3.46021	4.09055	2.49266	2.70826	3.09581	5.2828	4.21333	4.88177	3.38026	3.58966	3.77236	2.83585	4.89084	2.57354	2.45141	3.40678	3.94173	6.24148
ICGC_DO45207	4.15631	2.33021	2.52041	2.75239	2.87966	2.62743	2.70936	2.58342	3.10505	2.55976	3.79233	2.34747	5.50896	2.63683	7.18396	5.91326	3.46593	6.56398	2.45439	2.55859	3.38604	4.45312	3.66439	3.89013	3.57287	2.66449	4.22906	2.79868	4.50257	2.69068	2.45141	3.39357	3.48534	5.74269
ICGC_DO45209	3.91932	3.91662	3.61618	3.31419	2.70257	2.54423	3.68871	3.34875	2.29035	2.76777	2.80194	4.96071	4.47746	2.97046	6.01712	4.90741	3.67248	4.17174	3.0303	3.10627	4.71358	3.73592	2.72605	3.80351	3.57831	2.54885	3.48386	3.4722	5.0174	2.43306	2.45141	3.92467	2.75584	4.51164
ICGC_DO45215	3.06087	2.61399	2.60131	2.91415	2.94131	2.53017	2.70172	2.87314	3.62816	2.66378	3.36304	2.88244	4.60951	2.56602	5.5391	5.12477	3.00075	3.82074	2.45787	3.4269	3.48042	4.38064	3.00278	4.30447	3.6273	2.61801	3.97035	3.7266	3.51767	2.32906	2.45141	2.71286	2.76139	5.17412
ICGC_DO45217	2.66239	3.17302	2.82952	3.03267	2.77136	2.25138	2.78326	2.75311	3.45102	2.6538	3.15792	3.14326	6.29397	2.65331	7.0685	4.1128	4.18764	6.0192	2.42632	2.76215	3.25287	3.98582	2.65889	3.74952	4.17763	2.62364	3.66186	2.92531	5.37756	2.38489	2.45141	4.37851	2.99416	5.46144
ICGC_DO45229	4.79986	3.10684	2.58695	3.16713	2.78478	3.17766	2.89945	2.59722	3.50388	2.58231	4.03728	3.16377	5.1568	2.59885	6.4274	3.35541	3.50486	2.61222	2.43298	3.08973	4.17094	4.95063	3.06047	5.23793	3.39849	3.18379	3.91623	2.64165	4.91607	2.54082	2.5406	3.04961	3.15321	5.49853
ICGC_DO45233	3.41276	2.8885	2.54254	3.34775	3.13375	3.02323	2.87994	2.66733	3.29297	2.6268	4.23651	2.73931	5.79319	2.72921	6.58354	5.0326	3.13115	6.18001	2.4729	2.75965	4.16355	4.95098	3.52035	5.64576	3.92461	3.54904	3.47456	2.36481	5.94063	3.05897	2.72156	3.12378	4.17869	6.2815
ICGC_DO45241	3.98952	3.67587	2.51523	2.99124	2.56306	2.34546	3.16675	3.32606	3.03177	2.55976	3.46274	3.49458	5.84382	2.95815	5.59357	4.79655	4.73443	3.84071	2.56972	3.00014	3.95197	4.98585	2.73769	4.67413	5.50784	4.04549	3.39161	3.15423	4.19428	2.32906	2.45141	4.26752	4.02686	5.12032
ICGC_DO45243	2.63925	3.18588	2.52147	3.20762	2.70691	2.35012	2.83799	2.87924	3.26931	2.55976	3.22177	3.73363	4.82581	2.67804	6.34289	4.71387	3.8788	3.59435	2.46701	2.69573	3.51462	4.9125	2.88456	4.69706	5.20549	3.32807	3.91797	2.85779	4.43899	2.49091	2.46872	3.35988	3.8138	5.06459
ICGC_DO45249	4.35874	3.43587	2.73121	3.29426	2.67452	2.30744	2.967	3.36122	3.24632	2.60678	3.73093	2.62735	5.27721	2.73378	6.0094	4.65508	5.01013	4.24253	2.49696	2.55309	4.37589	6.48197	2.86491	5.20983	6.10085	3.12073	2.76537	2.45342	5.84035	2.34591	2.53361	2.45074	4.83891	6.58292
ICGC_DO45251	2.75667	3.59485	2.55129	3.05296	2.74153	2.35278	2.82677	2.91764	2.63342	2.58938	3.37083	2.67107	4.74919	2.66254	5.2593	5.04872	3.94936	3.18695	2.47697	2.44673	4.1229	5.38336	2.94786	5.56138	4.4561	3.30278	2.55209	2.5144	5.47801	2.4615	2.45141	2.71314	4.27465	5.6793
ICGC_DO45255	2.89609	3.51543	3.02322	3.50862	3.02975	2.74815	3.66948	3.38635	3.22902	2.69841	3.56642	3.52032	4.95684	2.6613	6.41511	3.87455	4.30895	4.46192	2.5069	2.78912	3.96517	4.65886	3.21749	4.82986	3.26156	2.92717	3.10559	2.5368	4.27307	2.42619	2.45141	2.98382	3.43737	4.54296
ICGC_DO45257	3.37196	2.81308	2.56633	2.88769	3.24206	2.84277	2.81889	3.59475	3.71273	2.76788	3.99055	2.49504	5.77207	2.65934	5.64083	5.21398	3.91685	6.29147	2.46688	2.95594	2.88425	4.90172	3.44879	4.04559	3.59465	2.93882	3.62469	2.74395	4.73185	2.61492	2.45141	3.45964	3.81986	5.79016
ICGC_DO45259	4.62453	2.31329	2.52157	2.55436	2.78495	2.24885	2.56465	2.85568	2.77943	2.55976	3.18933	4.84109	4.62581	2.47423	4.85539	6.39983	3.7881	2.29021	2.42632	2.38759	3.64631	4.90343	2.62206	3.18998	3.05422	2.51672	3.51507	2.56183	3.14982	2.498	2.45141	4.25474	3.72281	6.61211
ICGC_DO45261	2.83228	2.95482	2.97481	3.3591	3.45598	3.3371	3.55571	3.49095	3.79794	2.80438	4.5207	3.18541	5.73836	2.75201	7.08127	5.40901	5.07802	4.94634	2.5161	3.35518	3.16682	5.40437	4.18671	5.55692	4.15942	3.63226	3.44742	2.68247	5.66097	2.69825	2.51302	3.11042	4.22849	6.00988
ICGC_DO45273	2.99641	3.3675	2.55509	2.89754	2.78974	2.2493	2.84423	2.98419	2.82716	2.55976	4.05653	2.43286	5.48643	2.61125	6.46072	5.36162	4.39335	5.25517	2.91458	2.6639	3.11966	5.81008	2.66762	5.09542	5.04095	2.85689	3.06888	3.19988	5.11156	2.47769	2.58849	2.84574	4.51473	5.71952
ICGC_DO45281	2.76925	2.83429	2.56399	2.90511	2.57851	2.52104	2.9357	2.79841	3.42576	2.55976	3.42069	2.37549	5.11342	2.73024	5.77341	5.30822	3.37731	6.93352	2.68816	3.48183	3.86881	5.43679	2.46126	4.04461	4.55444	2.86773	3.54515	3.59073	4.47949	2.44526	2.45141	2.63142	2.52078	5.39071
ICGC_DO45285	3.36727	3.23531	2.7863	2.81177	2.86993	3.74205	3.4114	3.81332	2.95757	2.66105	4.95429	3.6422	6.20282	2.92864	5.9974	5.13002	4.97691	4.50446	5.18083	2.70571	3.9396	6.41938	2.77122	4.9213	4.82681	2.68191	2.84118	2.99	7.22103	2.67252	2.45141	5.35554	2.88803	5.39414
ICGC_DO45289	3.26121	2.38234	2.48054	2.56777	2.60193	2.18699	2.80618	3.00794	2.60323	2.55976	3.16779	2.56867	4.47113	2.53921	6.86421	4.40426	3.37835	5.68157	2.53796	2.43373	3.57224	5.84892	2.71754	2.86453	4.42948	2.36354	2.88485	2.59873	5.16456	2.32906	2.51523	3.77015	2.80842	5.74519
ICGC_DO45297	5.50987	2.48155	2.52664	2.64201	2.73145	2.4263	2.87524	3.73675	2.5767	2.55976	3.68036	2.33464	5.42555	2.69664	6.00027	4.9834	3.52373	3.06842	5.73604	2.48009	3.76624	6.35587	2.44423	3.11327	4.20193	2.50793	2.64928	2.57168	7.46719	2.96431	2.45141	4.29017	3.88559	5.03895
ICGC_DO45307	2.4394	4.21557	3.73745	3.49984	3.39783	3.50339	3.79375	6.25673	3.1009	2.62879	5.20491	3.43099	6.64307	2.91528	5.98782	4.59135	4.17049	2.44695	2.62115	3.28151	4.9015	6.45193	2.99088	5.65093	4.58895	3.48206	2.74081	2.58897	9.16712	2.43003	2.52111	3.54298	3.90828	6.64999
ICGC_DO48674	3.14326	2.31871	2.41173	2.62198	2.65544	2.63419	2.77352	2.85165	3.83536	2.77499	3.37795	2.64437	4.19171	2.62358	6.70772	3.48546	3.24912	6.77907	2.42633	3.71169	3.59376	4.20937	2.71973	4.37824	3.24074	2.54273	3.64693	3.45709	3.97265	2.54382	2.45142	3.42733	2.56724	4.16285
ICGC_DO48677	2.88395	2.57648	2.59195	2.61979	2.52899	2.37706	2.87073	2.63114	3.61422	2.55979	2.92876	2.3833	4.20661	2.47426	6.57501	4.27554	3.07583	2.60006	2.42634	2.62317	3.48867	3.31348	2.98712	2.70825	3.14458	2.38704	3.4463	2.26075	4.40833	2.40469	2.45144	3.40958	3.27998	5.48605
ICGC_DO48693	2.80035	4.44552	3.08587	4.1408	3.02182	3.22483	4.21933	3.07045	3.00871	2.69187	4.27593	4.25709	5.84849	2.85289	6.24655	3.05466	4.57779	5.5113	2.56225	4.00577	5.6019	5.40114	3.33949	5.90197	4.57114	3.15976	3.59821	3.68543	5.72776	2.55426	2.45141	4.07589	3.99406	5.30958
ICGC_DO48695	3.09057	2.2835	2.50729	2.65004	2.70126	2.22097	2.56465	2.57116	3.92505	2.55976	3.05854	2.31453	4.61343	2.47423	5.92857	4.65476	3.12723	4.52074	2.55935	2.93118	3.92602	4.47285	3.01123	2.87696	2.93715	2.33094	3.67701	2.94086	3.9908	2.68301	2.45141	4.7634	3.24602	5.17532
ICGC_DO48697	3.08013	3.82747	2.94324	3.52423	2.88784	3.00363	4.03961	2.76732	3.38682	2.62373	4.50787	3.38313	5.863	3.51522	5.91872	3.79588	5.07774	3.67011	2.63392	2.8413	4.39971	5.78735	3.08058	5.60554	4.75125	3.48818	3.36326	3.08536	5.68193	3.31989	2.67066	4.23134	4.43758	5.24365
ICGC_DO48701	2.85226	3.42401	2.53391	3.17533	2.76863	2.42857	3.23469	3.50869	3.53711	2.6087	3.55056	2.55714	5.08922	2.50099	5.6097	3.16436	3.68592	6.10245	2.57817	2.81612	3.82121	4.34958	3.05676	4.48998	4.16204	3.16206	3.70283	2.35531	4.41261	2.32906	2.45141	4.20092	3.28112	4.54869
ICGC_DO48704	3.08533	3.1607	2.70553	3.14686	2.95429	2.70036	3.02501	3.5581	2.99167	2.55976	3.64844	2.47443	5.14242	2.64373	5.99516	4.23399	3.82527	3.82074	2.42632	2.62694	3.42723	5.76346	3.2833	4.45827	4.68494	2.58496	3.43589	2.96651	5.10027	2.89512	2.45141	4.12833	4.26792	5.61044
ICGC_DO48706	2.71755	2.57102	2.79293	2.77193	2.76667	2.29836	2.65336	2.56688	3.27358	2.73262	2.97907	2.35727	4.13715	2.59951	5.35852	4.58837	3.52539	5.36972	2.53501	2.85196	3.31596	3.74799	2.61878	3.70421	3.10525	2.39506	3.34785	3.03387	3.16705	2.50941	2.45141	4.45992	2.8243	4.70387
ICGC_DO48715	2.45127	3.78065	3.1039	3.32877	2.72169	2.64172	3.41671	2.89408	4.00117	2.75413	3.49515	4.49254	4.9379	2.95886	5.42696	3.92354	4.26334	2.94035	2.4994	3.2706	5.59654	4.62076	2.9391	4.87598	3.6243	3.13486	4.13075	3.31978	4.15373	2.51888	2.45141	3.3208	3.73475	4.75052
ICGC_DO48716	3.01691	2.75594	2.63895	3.03556	3.01521	2.98501	2.85451	2.765	3.33616	2.68797	4.0887	3.10188	5.52112	2.61791	5.95593	5.39563	4.44525	5.08852	2.50912	3.10599	3.76379	5.09572	3.51793	4.68685	4.32705	3.23261	3.39045	3.21617	5.86551	2.51702	2.62763	2.92038	3.61224	6.11604
ICGC_DO48721	2.81378	2.2476	2.46762	2.5625	2.583	2.69115	2.56465	2.50342	2.81485	2.69701	2.48544	2.40571	3.88279	2.47423	6.13536	5.32496	3.11667	2.8477	2.42632	2.49676	3.22234	4.10589	2.56412	2.76895	3.45092	2.34941	3.37446	2.54519	3.32076	2.46058	2.45141	4.73637	2.96106	5.02376
ICGC_DO48725	2.46922	3.14225	2.63962	3.22089	2.79037	2.66585	3.10986	2.90997	3.67075	2.69216	4.25637	2.94835	5.71089	2.74832	5.93534	4.8792	3.72743	2.7112	2.49552	3.09944	3.68278	5.08155	3.32416	5.43523	4.26029	3.90533	3.98791	3.08856	4.8857	2.50972	2.64584	3.26336	4.10982	5.0432
ICGC_DO48733	2.90837	3.11877	2.85112	3.49784	2.86171	3.54942	3.05601	3.70554	3.64975	2.55976	4.29133	3.00169	5.5725	2.59709	6.34048	3.07877	4.01616	4.40791	2.46773	2.858	4.32871	4.81129	3.49632	5.50684	4.02067	3.80877	3.57127	2.98901	5.55757	2.92198	2.45141	3.24708	4.36795	5.89153
ICGC_DO48736	2.61957	3.70549	2.91228	3.50775	2.75392	2.81765	3.1164	2.83016	3.44121	2.55976	3.50226	3.87117	5.17528	2.74251	6.60287	4.99695	4.52379	2.65179	2.5086	2.82992	4.64924	5.78931	3.61062	5.91549	5.01245	4.4114	4.34219	2.82838	5.28392	2.59172	2.45141	3.91617	4.39682	5.2226
ICGC_DO48737	3.86325	3.22192	2.68251	3.02711	2.86154	2.67787	2.74008	2.55313	2.99568	2.6099	3.54425	2.42165	5.31939	2.71037	5.93805	4.98034	4.69083	2.45588	2.63015	2.5705	3.40897	4.87882	2.75482	4.64029	4.29726	3.02758	3.1892	3.14588	5.42722	2.42613	2.46365	4.44491	3.51335	5.00431
ICGC_DO48741	2.89081	3.35111	2.7552	2.76275	2.84995	2.62323	3.15321	2.60634	3.1149	2.86303	3.44969	3.12853	5.22032	2.61791	5.5618	4.51186	3.95648	5.90785	3.86432	2.84287	3.73342	3.74359	2.9614	4.14631	4.5958	2.76966	2.90527	2.56961	4.77255	2.32909	2.45144	3.65127	2.62438	4.66701
ICGC_DO48742	2.47455	2.94678	2.56492	2.99434	2.91553	2.90862	2.99276	2.90561	3.34713	2.7161	3.86236	2.78466	5.39265	2.58066	7.00452	4.79406	3.23866	6.62984	2.46959	2.71956	3.6154	4.96659	3.41617	4.80491	3.55657	3.15259	3.93196	2.64871	4.30205	2.54465	2.45141	3.50028	3.40947	5.42674
ICGC_DO48746	3.34903	2.43898	2.57937	2.63686	2.91024	2.17904	2.70941	2.84969	3.76011	2.7022	2.88917	2.57661	4.2097	2.53868	5.76334	3.91041	3.22629	6.42828	2.55813	3.21315	2.39287	3.01886	3.03032	3.18062	3.17904	2.49291	3.80043	3.07705	5.59653	2.63601	2.61606	3.64559	3.03106	5.37639
ICGC_DO48747	2.66706	5.04688	3.47616	4.35532	3.56479	4.36947	5.20354	4.48855	4.0674	2.64679	5.70284	5.34436	6.77489	3.61731	6.18805	5.64028	6.03268	4.45283	2.96801	3.63715	6.85862	6.53803	3.47699	6.18591	4.82769	3.41008	4.09568	2.97332	6.54367	2.9635	2.45141	4.75338	4.02659	6.01931
ICGC_DO48759	3.61759	2.51166	2.51157	2.71354	2.96441	2.4131	2.79654	2.60942	3.85842	2.71385	4.0233	2.53374	5.50366	2.85179	6.26051	4.70352	4.52379	4.50262	2.52966	2.73698	2.96761	5.3494	3.4189	4.62582	3.60777	2.86201	3.57703	2.47694	4.23715	2.46125	2.45141	2.71286	4.02528	5.26541
ICGC_DO48760	2.81952	2.5307	2.49295	2.86512	2.98359	3.47225	2.69887	2.74344	3.64588	2.77231	3.9474	2.61876	5.04849	2.6008	6.42152	5.06696	2.7537	4.2012	2.47077	3.57902	3.00537	4.99356	2.74724	4.29387	2.61676	2.63221	3.6054	3.08109	4.49367	2.8565	2.63631	5.0588	2.33466	5.12032
ICGC_DO48761	3.00877	3.28493	2.75235	3.5075	3.31641	2.71093	3.00839	2.89856	3.55462	2.74456	4.45577	2.72058	5.64002	2.63962	6.03297	3.19667	3.58537	4.40363	2.4936	2.88758	3.36637	4.75847	3.19618	5.13403	3.28444	3.46016	3.54423	2.7353	4.80179	2.52507	2.45141	2.99654	3.82358	5.82836
ICGC_DO50776	2.8617	2.69559	2.48369	3.12594	2.576	2.81765	2.85391	2.94831	3.29779	2.77316	3.7194	2.54963	5.61684	2.66728	6.24488	5.13386	4.13737	5.30681	2.55029	2.59933	3.46049	5.02385	2.94182	4.52056	4.06266	3.33559	3.70421	2.40468	4.60776	2.42655	2.62875	3.33518	4.28779	4.78725
ICGC_DO50783	4.4417	2.37873	2.5769	2.68828	2.73948	2.26927	2.98012	3.22847	3.41984	2.55976	2.92487	2.37822	4.71552	2.53501	6.19835	4.02059	4.23088	3.6965	2.63036	3.33926	3.1189	4.20177	2.63054	3.7378	3.85407	2.3599	3.93285	2.81868	4.56043	2.45245	2.45141	3.09868	2.98062	5.20145
ICGC_DO50787	3.80441	3.82942	3.79371	4.11125	3.94912	3.80587	3.69231	3.2911	3.70072	2.71296	4.7563	4.75118	6.23652	2.94148	5.62091	5.69478	3.91489	4.85858	2.49512	3.17323	5.45716	5.70764	4.25423	5.94024	3.7617	3.39104	3.68324	3.07834	5.31836	2.86413	2.45141	3.14898	3.59774	6.13542
ICGC_DO50789	2.38376	2.71286	2.53075	2.80665	2.65445	2.38635	2.56465	2.69695	3.84045	2.55976	3.06207	2.85654	4.3318	2.61107	5.89343	5.33163	3.76161	3.26673	2.42632	2.53142	3.04547	4.04798	2.76391	4.04357	3.0521	3.03421	3.84201	2.68455	3.35802	2.66909	2.45141	3.58045	3.94147	5.23108
ICGC_DO50791	2.74189	3.42401	2.82441	3.07581	2.7617	2.3968	2.81958	2.69475	3.07161	2.67825	3.18987	2.92503	5.32702	2.75794	5.50028	3.64531	3.8753	2.62363	2.4716	3.02856	4.33242	4.69129	3.16834	4.198	4.57579	2.85089	3.34675	2.79326	4.28713	2.35969	2.45141	3.85406	3.5639	4.99276
ICGC_DO50798	3.6313	2.57911	2.53106	2.82093	2.8394	2.26864	2.65631	2.80649	4.0928	2.55976	2.95481	2.6563	4.36108	2.62769	6.29062	4.52042	3.73057	4.22477	2.46381	2.78714	3.51768	3.53235	2.839	3.65936	3.74587	2.85039	3.16891	2.60784	3.83365	2.59904	2.45141	3.19269	3.43961	5.46002
ICGC_DO50800	2.56119	2.84333	2.68087	2.99499	3.47975	3.68403	2.87574	3.00303	3.52027	3.58919	4.57447	2.57784	6.35218	3.09998	6.56421	5.04736	6.13217	6.56843	2.46329	3.62098	3.38315	6.06863	3.17031	5.74543	4.57249	3.1841	3.60339	3.70883	6.04259	3.22592	2.47484	4.17485	5.44964	7.09063
ICGC_DO50802	4.06123	2.38624	2.44353	2.61677	2.74828	2.37492	2.56465	2.54404	3.22463	2.64723	3.15256	2.48018	4.5007	2.55304	5.55562	4.64951	3.82587	6.12197	2.46779	2.51678	3.26908	3.71044	2.89855	3.18318	3.46113	2.55075	4.02866	2.84727	3.54209	2.55973	2.54947	3.19047	3.03844	4.37637
ICGC_DO50803	2.77517	4.72159	3.80662	4.83441	4.03142	3.94424	3.53202	4.21956	4.23581	2.6437	5.15235	4.41736	5.68833	2.87923	6.77817	6.78208	4.43047	3.02041	2.47036	3.54184	5.36983	5.59108	3.99864	6.2314	3.68067	3.51453	3.71907	3.25338	5.96919	2.71792	2.459	3.13812	3.9275	5.50869
ICGC_DO50805	3.77701	4.20898	3.20486	3.70543	3.25943	3.25262	3.47214	3.95755	3.78077	2.64599	4.70358	3.27277	5.85893	2.99626	6.08656	4.74848	5.59649	3.34236	2.52226	3.00014	4.29054	5.48063	3.64712	5.67427	4.65397	3.54868	3.72302	2.56796	6.80583	2.78695	2.45141	3.11157	4.61494	5.19568
ICGC_DO50806	3.18077	3.80748	3.11507	3.58073	2.858	2.84992	3.39678	3.16424	3.565	3.02475	4.28777	4.28821	5.54308	2.98516	7.21196	5.81469	4.87673	4.98062	3.09467	3.07298	4.81593	4.8575	3.44338	5.12493	3.6303	3.14474	3.81487	2.84331	4.49202	2.58663	2.45141	3.49142	3.35038	5.10234
ICGC_DO50807	6.93944	2.58733	2.56243	2.78413	2.99237	2.97657	2.72268	2.5772	3.17155	2.61801	3.42381	2.46364	5.18516	2.60223	7.50068	4.79278	3.54069	6.29589	2.42632	2.80292	2.83711	4.4845	3.14653	3.66068	3.22626	2.60053	3.87908	2.83733	4.58037	2.69862	2.45141	3.36594	3.82803	4.93278
ICGC_DO50811	2.71451	2.60359	2.4816	2.87732	2.55217	2.20339	2.76729	2.57982	3.41946	2.55976	2.59494	2.76806	4.29472	2.58856	7.2999	4.55254	3.62187	2.99551	2.95065	2.77915	3.29637	3.17644	2.73553	2.8266	3.36218	2.60764	4.11614	3.49585	4.78201	2.57493	2.45141	2.92596	3.04164	4.98242
ICGC_DO50813	3.15862	2.29676	2.48353	2.60671	2.73522	2.51141	2.73746	2.66272	3.25026	2.70846	3.15201	2.34848	5.13756	2.58422	6.72567	4.66873	3.99401	3.58597	2.42632	2.68141	3.14604	4.95449	2.87544	3.67784	3.68992	2.3904	3.49935	2.91611	3.9897	2.55086	2.45141	3.042	3.94334	4.91022
ICGC_DO50814	6.25246	3.38131	2.66423	2.87968	2.82099	2.51141	2.7859	2.83861	3.54437	2.7498	3.31538	3.79775	4.84891	2.7409	8.50411	3.06398	4.99987	3.47611	2.42637	2.80469	3.78762	4.36371	2.89214	4.26214	4.25956	2.58937	3.01933	3.26098	5.12352	2.32913	2.45149	3.36719	2.76231	4.07479
ICGC_DO50816	3.04821	3.34272	2.68251	2.96476	2.73373	2.35181	3.05671	2.95205	3.33741	2.55976	3.04199	3.28717	4.72426	2.62648	7.82404	5.76806	3.5467	2.51766	2.58647	3.57333	3.51804	3.85144	2.73986	3.45403	4.13765	2.66002	3.39907	2.79437	3.25431	2.47015	2.45141	4.27439	3.14403	4.95496
ICGC_DO50817	3.25636	3.33039	2.87644	3.20738	2.5872	2.40561	3.51356	3.21974	4.30311	2.55976	3.2343	3.6574	4.49817	2.78302	8.43068	3.03329	3.37682	4.22156	2.42632	3.09053	3.97901	3.5666	3.21034	3.82499	3.41107	2.65086	3.7031	3.16942	3.4823	2.32906	2.45141	3.78518	3.16747	5.23543
ICGC_DO50818	2.55679	3.45196	3.05498	3.44544	3.10215	4.10343	3.40718	2.88375	3.21545	2.64121	4.10735	3.71495	5.436	2.79868	4.6304	4.5032	4.20018	4.17	2.50447	3.17433	4.94995	5.43431	3.03374	5.00768	3.39197	3.11347	3.80348	3.24348	4.30857	2.55879	2.45141	3.3208	3.46501	5.25332
ICGC_DO50819	3.2177	4.35813	3.97619	4.01653	3.9166	4.23393	3.23918	3.23335	3.57568	2.9202	5.00619	5.52411	6.73977	2.9037	7.57841	3.78423	5.14338	5.02617	2.42632	3.32302	6.40149	6.19002	3.94433	6.10242	4.29197	3.33093	3.93254	2.83961	5.92624	3.34417	2.55063	3.53897	4.13336	5.53936
ICGC_DO50820	2.67708	2.51002	2.62682	2.86796	2.74694	2.82591	2.74592	2.6769	3.07898	2.64407	3.10391	3.11416	4.46832	2.58665	6.37093	3.10198	3.72575	3.32248	2.42632	2.75836	3.33525	4.01365	2.71291	3.69068	3.01147	2.88378	4.50563	2.75841	3.91528	2.84794	2.45141	5.01516	3.25265	5.01216
ICGC_DO50832	4.29299	2.25811	2.44548	2.55053	2.57969	2.71617	2.72736	2.81882	4.07837	2.71075	2.67125	2.30742	4.26115	2.51866	6.2315	5.60903	3.27266	3.6841	2.99622	2.42076	2.42559	3.24059	3.22536	2.4581	3.24453	2.31039	3.21036	2.50725	2.89167	2.45616	2.45141	3.36942	3.11665	4.89024
ICGC_DO50839	2.5416	2.3323	2.58713	2.62837	2.6576	2.27578	2.56489	2.50362	4.139	2.55999	3.24242	2.40682	4.81901	2.62881	4.35681	5.08122	4.18284	2.19465	2.84335	5.08498	3.20865	4.39905	2.62509	4.00296	4.31287	2.46386	3.78713	2.73042	5.18244	2.32926	2.45167	3.69199	3.19363	4.11369
ICGC_DO50840	2.49471	2.95739	2.51335	2.88769	2.77199	2.27315	2.83754	2.53196	3.7438	2.6153	3.30601	2.56281	5.14289	4.30012	6.43134	3.63189	4.00974	2.60851	2.61089	2.65467	3.3318	4.47447	3.14178	3.67425	3.95092	2.76609	3.72471	2.67818	3.49716	2.34216	2.47726	3.64471	3.90533	4.45259
ICGC_DO50845	3.17655	4.09195	2.5838	2.93629	2.54298	2.48073	3.79072	2.91879	2.72015	2.73538	3.31316	3.27005	6.12645	2.87585	6.46735	5.42887	4.78073	6.95454	5.15552	3.89672	3.36598	5.40437	2.87587	3.63609	5.41869	3.50869	3.39705	2.86532	5.95387	2.46909	2.45145	3.99049	3.52602	5.28654
ICGC_DO50855	2.90072	3.04441	2.51617	3.05538	2.61345	2.23729	2.73328	2.56738	3.07508	2.55976	3.21568	3.83862	4.97421	2.70338	6.64605	3.90893	4.65181	3.92846	2.46782	2.71422	4.29561	4.75016	3.04141	5.37228	4.8184	4.25791	4.33584	2.5397	4.58632	3.35393	2.45141	3.61119	4.26018	6.06823
ICGC_DO50857	3.52274	3.40214	3.08876	3.33479	3.00582	2.67096	2.84948	2.9848	3.31324	2.5994	3.40107	3.00452	4.50476	2.63924	6.67868	4.65758	3.65567	5.9838	2.44912	2.64832	3.11715	3.75371	3.42719	4.5647	3.0656	3.58487	3.57239	2.57362	4.10851	3.49585	2.45141	5.67179	3.25409	4.63005
TCGA_TCGA-2Y-A9GT	3.3273	4.31335	3.56201	4.4264	2.84282	3.45145	3.45642	2.99253	3.35124	2.65732	4.01301	4.62545	5.44587	2.84023	6.31276	4.81981	3.79297	5.18125	2.4875	3.47425	5.40781	4.77881	3.74662	5.47756	4.59483	3.26027	3.76905	3.58747	4.62888	2.52354	2.46476	3.23906	3.9479	5.30232
TCGA_TCGA-2Y-A9GU	3.07757	2.69811	2.61768	2.87713	2.71746	2.41377	3.30299	3.02437	3.03873	2.59333	3.21027	2.75202	4.29201	2.64463	6.67082	5.58677	3.21261	4.61123	2.48487	2.65151	3.35613	3.91262	2.92357	3.66257	3.1456	2.74843	3.94028	2.75198	3.34128	2.6655	2.46476	4.27612	3.51808	4.6468
TCGA_TCGA-2Y-A9GV	2.80383	2.75615	2.57373	3.02749	2.79405	3.57022	2.71842	2.96836	3.15395	2.66378	4.13725	2.81851	6.11647	2.63717	6.25925	4.96958	3.8914	5.11067	2.46754	2.82783	3.65515	4.81017	4.37269	4.15285	4.47288	3.05815	3.79107	2.89831	5.64557	2.9909	2.46476	3.47063	4.21118	5.61822
TCGA_TCGA-2Y-A9GW	3.23523	3.36504	3.12851	3.27688	3.24742	3.46511	3.01858	3.05932	3.10468	2.66823	4.55183	2.69905	5.94215	2.75872	4.53449	4.87782	4.41672	2.67493	2.64198	3.64975	3.99336	5.38431	3.26104	5.47835	4.42794	3.33175	3.22863	2.67027	7.10535	2.80562	2.46476	3.53017	4.21686	5.41866
TCGA_TCGA-2Y-A9GZ	4.90272	2.3771	2.4853	2.68352	2.67179	2.44422	2.70571	2.46076	3.18655	2.61942	3.02782	2.28905	4.66711	2.56618	6.77198	4.16335	3.54601	7.50105	2.46754	2.58648	3.40195	3.50935	2.74741	3.21999	3.77585	2.49433	3.71652	2.67645	4.1307	2.48907	2.46476	3.74596	3.4117	5.08896
TCGA_TCGA-2Y-A9H1	3.21904	3.30478	2.77901	3.28561	2.67584	2.53071	3.07274	2.98508	2.97658	2.64855	3.16598	3.07613	4.7759	2.60164	7.0707	4.98276	4.83929	4.68752	2.46754	2.72624	4.3921	4.36457	2.76636	4.30391	3.23939	2.66535	3.60031	2.57247	5.51491	2.36315	2.46476	3.01785	2.88837	4.01635
TCGA_TCGA-2Y-A9H3	3.1063	3.80255	2.9162	3.5514	2.87669	2.93385	3.11391	3.26329	3.02317	2.77172	3.86069	3.50796	5.59016	3.04947	6.87334	4.12385	5.14611	7.35201	2.4869	3.29325	5.75162	5.43401	3.00105	5.63062	3.67888	2.88733	3.48697	3.03298	4.7156	2.48971	2.46476	3.65299	2.9748	4.59847
TCGA_TCGA-2Y-A9H4	3.60207	2.68689	2.96168	2.75568	2.68918	3.04941	2.75924	2.68106	3.1106	2.69238	3.66779	2.62399	5.59917	2.64545	6.17903	3.00119	3.91512	5.82548	2.50886	2.73907	3.31242	4.50508	2.66389	4.19879	3.47352	2.81764	3.15389	2.8341	3.48443	2.36938	2.46476	3.32389	3.25324	4.54216
TCGA_TCGA-2Y-A9H6	2.74508	3.00056	2.63175	3.11509	2.82404	2.83633	3.06043	3.54264	3.9081	2.6202	3.8783	3.11617	5.65245	2.76164	5.69029	4.2474	4.15194	2.79276	2.46754	2.93426	4.26818	4.95723	3.13566	5.51569	4.25611	3.66911	3.98733	2.94154	4.73958	2.54152	2.67674	3.80141	4.10073	5.37084
TCGA_TCGA-2Y-A9H7	2.76123	2.61079	2.51648	2.88669	2.69038	2.33893	2.80267	2.49465	3.35174	2.61404	3.23959	2.56336	4.57354	2.64138	5.05236	3.02348	3.04933	2.69424	2.49292	2.71139	3.31638	3.75795	3.01033	4.90789	3.57856	3.35352	3.78667	2.64125	3.7196	2.4781	2.46476	2.77919	2.96701	5.32756
TCGA_TCGA-2Y-A9H8	2.96028	3.8763	3.05308	3.67155	2.80746	2.97913	3.47749	2.8427	3.13435	2.66588	3.75721	3.70111	5.48904	2.86333	6.30091	4.55403	4.03158	5.47591	2.46754	3.30201	4.75182	4.57237	3.357	4.95425	4.93005	3.01816	3.88298	3.01814	4.47186	2.50336	2.46476	3.76995	2.92509	4.82573
TCGA_TCGA-2Y-A9H9	3.88846	2.92159	2.63848	2.88163	2.72456	3.05972	2.80761	2.45032	3.10802	2.71776	3.60645	2.6673	4.86463	2.61597	6.78328	4.64082	3.88252	4.71463	2.48082	2.66459	3.56182	4.43984	2.96881	3.82043	3.46173	2.35929	3.2271	2.79541	4.23728	2.42193	2.55145	3.5819	3.40455	4.92872
TCGA_TCGA-2Y-A9HB	3.59624	3.6988	2.83937	3.58356	3.00671	3.12436	3.08935	2.65088	3.36049	2.59333	3.87241	4.03056	5.16621	2.76351	5.99151	4.62337	3.71179	2.3962	2.49673	2.95601	4.54967	5.69321	2.95896	5.04627	3.59236	3.00234	3.42447	2.80061	4.35289	2.64033	2.46476	4.46705	3.72457	4.95746
TCGA_TCGA-3K-AAZ8	3.24505	3.20248	2.58234	3.20849	2.63137	2.52364	2.99005	2.5909	3.34915	2.61841	3.26623	3.07724	4.69127	2.60141	6.29628	4.19051	3.6231	7.51734	2.46754	2.74758	3.71301	4.07843	3.13424	4.68557	3.97388	3.25504	3.74498	2.81825	4.03517	2.45991	2.46476	3.57656	2.79232	4.9386
TCGA_TCGA-4R-AA8I	4.98016	3.01423	2.59007	2.99323	2.82935	2.65806	2.957	2.65527	3.49914	2.7108	3.81274	2.66524	5.33315	2.56595	6.25059	3.49407	4.03876	3.32145	2.50462	3.00262	3.40055	4.43915	3.66323	3.91431	4.95452	2.90843	3.83662	3.20812	4.34621	2.56571	3.02736	3.89918	3.54502	5.53349
TCGA_TCGA-5C-AAPD	2.81763	4.57503	3.40567	3.93063	3.53341	3.67801	3.55085	3.4734	3.68064	2.62373	4.87692	4.28863	6.36453	3.7948	5.98782	4.62517	5.21954	4.04727	2.55817	3.17396	5.89889	6.21994	3.3249	5.96808	6.76749	3.01021	3.25607	2.56301	5.70908	3.07009	2.46476	3.93349	3.73414	5.06893
TCGA_TCGA-5R-AA1D	3.03755	3.00942	2.62021	2.87216	2.77332	3.20498	3.0003	2.88784	3.1335	2.65843	3.78611	3.03397	5.66811	2.90599	6.36786	4.19707	4.4273	4.18258	2.46754	2.69521	3.83851	4.89375	3.55835	4.58545	3.56035	3.36234	2.82082	2.74554	5.86103	2.72186	2.46476	3.38678	5.37867	6.68534
TCGA_TCGA-5R-AAAM	2.77676	2.7484	2.5764	2.82249	2.91098	3.47456	2.81693	2.64394	3.07114	2.75779	4.21898	2.93025	5.84182	2.67654	7.00981	3.5176	3.11241	3.32652	2.46754	3.28632	3.56186	4.97892	3.09016	4.58737	3.20981	3.35136	3.1887	2.92293	5.64207	2.50416	2.46476	2.95819	3.60468	6.06866
TCGA_TCGA-BC-A10S	4.31785	2.68676	2.4964	2.87154	2.85844	3.1394	2.8841	2.57042	3.15475	3.09525	4.15753	2.86251	6.10609	2.61177	6.0037	5.78986	4.78454	5.31923	2.47951	2.7738	3.74585	5.09946	3.40346	4.84927	3.36474	3.21221	3.21377	2.94328	4.95621	2.75366	2.46476	3.01629	3.78345	5.25077
TCGA_TCGA-BC-A10X	3.36997	2.53344	2.61818	2.79247	2.87976	3.25817	2.74261	2.83338	3.03038	2.71631	4.15013	2.63582	4.86242	2.70054	6.53249	3.91545	2.67474	5.24678	2.46754	3.33916	3.6485	4.78446	3.02464	4.347	2.71556	2.6862	3.07024	3.22257	4.72382	2.54456	2.53833	3.1521	3.14231	5.98654
TCGA_TCGA-BC-A10Y	2.96684	3.0799	2.92899	3.32334	2.80273	3.14362	2.93276	2.78638	3.31434	2.69993	3.74779	3.47706	5.13637	2.69314	5.42226	5.52095	4.62214	4.65494	2.64327	2.81864	4.08853	5.00131	3.5045	4.18345	3.70398	2.77747	3.87324	2.96382	3.88603	2.61939	2.46476	3.89294	3.52184	4.89817
TCGA_TCGA-BC-A110	4.50127	3.18331	2.56147	3.16199	3.1815	3.41689	2.81775	3.00238	3.58628	2.59333	4.6213	2.97512	6.25706	2.89917	7.23026	5.69613	3.14359	3.77555	2.51456	3.14022	3.84637	5.2023	3.02471	5.37387	3.23156	3.44861	2.88659	2.65556	5.11028	2.37432	2.46476	3.33578	3.73075	5.74139
TCGA_TCGA-BC-A216	3.82549	4.59532	3.7438	3.67738	3.03424	2.44967	3.5177	2.91165	3.13234	2.75181	3.44198	4.98923	5.01899	2.79358	7.43831	4.22908	3.18187	3.48327	4.00894	3.58604	5.04835	4.66721	3.61812	4.77253	3.90281	2.79956	3.79101	3.02313	4.70325	2.41917	2.46476	3.64676	3.35403	5.94168
TCGA_TCGA-BC-A217	2.84877	3.50054	2.77772	3.33887	2.80676	3.23028	3.20239	3.19516	3.00398	2.73427	4.00522	3.11071	5.31332	2.67096	6.3789	6.15875	4.1635	5.64464	2.69933	2.74021	4.2062	5.23069	3.67804	4.56055	4.89222	3.60337	3.88535	3.16091	4.4698	2.82504	2.46476	4.53425	2.65643	4.78684
TCGA_TCGA-BC-A3KF	2.61623	2.43421	2.51278	2.75838	2.66027	2.51231	2.75312	2.73276	3.26566	2.62474	3.32214	2.50706	4.74567	2.50115	4.53032	4.13061	3.03964	5.53798	2.46754	2.52193	3.11077	4.00823	3.24461	3.47292	3.31963	3.15475	3.54249	2.72457	3.52148	2.66267	2.52846	4.07824	3.25834	5.23453
TCGA_TCGA-BC-A5W4	3.37113	2.32295	2.47992	2.64336	2.61184	2.24418	2.8225	2.43538	3.17688	2.59333	2.78885	2.2693	4.11695	2.48253	7.28557	3.92342	2.66591	5.98988	2.6235	2.44425	2.69503	4.33068	2.52656	2.74238	3.96821	2.40701	3.36504	2.46796	7.05514	2.36536	2.46476	5.89235	2.45676	4.2501
TCGA_TCGA-BC-A69H	3.53309	3.50797	2.78253	3.27052	2.87767	2.67954	3.11144	2.65589	2.98673	2.62039	4.36758	3.71194	5.62141	2.70288	6.94174	3.90119	5.4291	6.32005	2.66648	2.54407	4.31058	5.56011	2.87112	4.82114	3.50233	2.84246	3.17441	2.44137	4.86849	2.36227	2.67823	3.47639	3.04447	4.94863
TCGA_TCGA-BC-A69I	6.10549	2.47569	2.52203	2.61761	2.78098	2.54702	2.86169	2.48853	3.30434	2.83098	3.55207	2.50964	4.82484	2.53728	6.7692	4.55296	4.19319	2.82515	2.46754	2.61419	2.96438	4.3451	3.0041	3.90807	3.48156	2.60138	3.20446	2.54143	5.05269	2.53329	2.46476	3.37556	3.29369	5.56551
TCGA_TCGA-BD-A2L6	5.15404	2.66695	2.52941	2.86142	2.67516	2.40873	2.8927	2.43896	3.00741	2.65863	3.13502	2.54167	4.57659	2.65768	6.85779	6.09308	3.95981	3.05803	2.46754	2.83922	3.01652	3.9885	2.7684	4.38986	3.78242	3.48336	3.45763	2.72789	3.65702	2.36856	2.53176	3.08184	3.41727	4.74734
TCGA_TCGA-BD-A3EP	3.66609	3.9724	3.14777	4.00468	3.38985	2.80658	3.28797	3.60102	3.5814	2.64963	4.56536	3.5823	5.96666	3.22598	6.70446	5.85845	4.59484	5.56777	2.5193	2.94798	5.60706	5.16262	4.02993	5.91032	4.73701	3.7248	3.28882	2.77443	6.14805	2.97162	2.46476	3.73093	5.02782	5.93549
TCGA_TCGA-BD-A3ER	3.32656	3.01	2.71107	2.9235	2.82275	2.61552	2.91553	2.5271	3.59703	2.59333	3.77427	2.52846	5.18624	2.77947	6.34717	4.6437	4.12054	3.79839	2.48148	2.51536	3.36603	4.86618	3.22316	4.03933	3.52323	3.10239	3.23175	2.49198	4.91579	3.07612	2.46476	3.08198	4.78153	5.7282
TCGA_TCGA-BW-A5NO	2.77093	3.25067	2.69014	3.10956	2.78588	3.0217	3.28355	3.94466	3.19305	2.59333	3.96585	2.81825	5.50634	2.64292	6.67966	4.38805	4.06095	3.41062	2.60631	2.63973	4.14785	4.03414	3.90952	4.53557	3.87409	3.44585	3.8909	3.25253	6.452	2.38356	2.46476	4.04035	3.14263	4.86431
TCGA_TCGA-CC-5259	2.80808	2.84859	2.68789	2.76513	2.61184	2.33416	3.12757	2.62654	3.53784	2.71064	2.89889	2.73378	4.4823	2.53336	5.3064	3.88856	4.16517	6.63643	2.62493	2.48642	3.89931	3.98872	2.59726	3.43417	2.6067	2.75488	3.35999	2.77533	3.48436	2.36566	2.46476	2.92537	2.68527	5.08571
TCGA_TCGA-CC-A123	3.01337	2.89785	2.49967	2.92443	2.65124	2.20307	2.86033	2.48787	3.68456	2.59333	3.44314	2.24184	4.58458	2.55045	6.42306	5.06856	3.55254	7.40023	2.46754	2.43157	3.01089	4.36384	2.78923	3.90731	2.7899	2.55739	3.13103	2.55985	3.28084	2.36064	2.46476	2.76996	2.64648	5.05516
TCGA_TCGA-CC-A7IF	3.05616	2.36695	2.49941	2.63577	2.6283	2.28315	2.75358	3.01578	3.46459	2.61447	3.00045	2.33495	4.36954	2.55887	6.371	4.09173	3.83222	2.91182	2.46754	2.44876	2.98394	3.79836	2.58846	3.26642	5.29457	2.60787	4.14966	2.61514	3.20103	2.35604	2.46476	3.86338	3.03117	4.42907
TCGA_TCGA-CC-A7IG	5.25667	2.93349	2.62341	2.78663	2.78279	2.39814	2.79092	4.42912	3.63757	2.59333	3.65474	6.1941	5.52759	2.63981	7.13894	5.39035	5.11664	6.83231	2.46754	2.50537	3.00117	5.91745	3.01685	3.68518	3.69575	2.51917	3.40735	2.56637	4.89894	2.47406	2.46476	3.84351	2.91722	5.07346
TCGA_TCGA-CC-A7IH	5.26563	2.34653	2.56421	2.67442	2.64651	2.53825	2.67072	2.71828	3.78871	2.68092	2.81383	2.3022	4.22231	2.50353	7.09242	4.63597	3.15196	5.35648	2.71492	2.67561	2.74112	3.88839	2.92184	3.16594	3.00651	2.55007	3.84924	3.06109	3.96972	2.46843	2.46476	3.40544	2.71123	6.75934
TCGA_TCGA-CC-A7II	2.83598	2.55051	3.28063	2.64033	3.0861	2.51224	2.89601	2.84941	3.01587	2.64574	3.74289	2.45985	5.25251	2.58135	7.02524	4.53205	4.85579	3.583	2.51574	2.75185	2.80644	4.98417	2.66324	4.01637	3.00852	2.42244	2.84406	2.56488	5.04218	2.41539	2.46476	3.68597	3.47818	4.69117
TCGA_TCGA-CC-A7IL	2.55886	2.37608	2.48736	2.63231	2.68964	2.1966	2.69374	2.68255	3.49503	2.59333	2.76702	2.31782	4.13494	2.4751	6.47935	5.70698	3.14634	2.56099	2.46754	2.39512	2.69413	3.48674	2.62907	2.77895	2.80299	2.35001	4.83827	2.50139	2.75077	2.45427	2.46476	3.06224	2.74121	4.00514
TCGA_TCGA-DD-A119	3.37097	2.47876	2.57375	2.68392	2.67216	2.28623	2.8202	2.94554	3.26477	2.65172	3.15294	2.45354	4.60947	2.56333	5.26667	4.52208	3.89193	4.58792	2.46754	2.54723	2.91921	4.35075	2.59317	4.36726	3.48139	2.57467	3.2427	2.41922	3.92929	2.43411	2.54426	3.30774	3.45407	4.34033
TCGA_TCGA-DD-A11B	2.79795	2.36935	2.48848	2.71024	2.6632	2.91345	2.75799	2.50161	3.74633	2.61564	2.85533	2.52503	4.3984	2.54005	6.91782	5.47398	2.78086	3.05892	2.48129	2.66164	3.0042	3.2832	2.93168	3.53015	3.27253	2.90733	3.56977	2.62534	3.3887	2.50881	2.46476	4.20659	3.39217	5.44088
TCGA_TCGA-DD-A11D	3.24475	2.45774	2.50182	2.79722	2.71338	2.63722	2.73029	2.45258	3.43709	2.638	3.17201	2.35935	4.54745	2.49103	5.57274	3.99283	4.22805	6.99374	2.46754	2.42304	2.87143	4.63414	3.03244	3.75097	3.6139	3.07841	3.56939	2.89494	3.95691	2.55015	2.46476	3.15948	3.163	5.0904
TCGA_TCGA-DD-A1EB	2.72671	2.76882	2.77791	2.88838	2.70108	3.86037	2.89989	2.55684	3.01167	2.70755	3.1612	2.91489	4.56782	2.55694	4.68902	6.28438	3.56111	6.23503	2.46754	3.23916	3.4651	3.8094	2.68923	3.54488	3.55727	2.69062	3.39669	2.63675	3.63174	2.35865	2.46476	2.90051	3.12834	4.91734
TCGA_TCGA-DD-A1ED	2.91084	2.80049	2.54834	3.06425	2.83849	2.98183	2.99661	3.11495	3.33408	2.71272	4.15172	2.72875	5.23961	2.66918	6.08912	6.27549	3.32428	5.65728	2.51052	3.04395	3.27214	4.13761	3.28124	4.88514	3.15355	3.15928	2.84415	3.62519	5.78244	2.833	2.46476	2.93485	4.0652	5.9478
TCGA_TCGA-DD-A39V	3.14667	3.89674	3.48368	3.32128	2.94897	3.27502	3.73794	3.05904	3.16183	2.59333	4.05184	4.36836	5.56743	2.74532	6.23743	4.77759	4.66809	3.47857	2.46754	3.25674	5.06916	5.56247	3.04103	4.99299	2.82665	2.40443	3.68122	2.57903	6.36059	2.63017	2.46476	3.0386	3.0695	5.03426
TCGA_TCGA-DD-A39X	5.52452	2.64901	2.49729	2.86382	2.73066	2.35814	2.74897	3.76841	3.35641	2.59333	3.43721	2.59176	5.21526	2.71975	7.53131	5.43783	4.07844	5.96717	2.47982	2.78283	3.28083	4.87287	2.67964	4.49332	3.48867	2.95151	3.11567	2.61895	4.08878	2.37542	2.46476	2.81839	3.52008	4.82583
TCGA_TCGA-DD-A39Z	3.54426	2.38272	2.47924	2.61761	2.61184	2.12121	2.74658	2.5298	3.29718	2.59333	2.56154	2.43485	4.15988	2.48187	5.81185	5.66868	3.97139	3.16235	2.46754	2.62519	2.92184	3.77367	2.48777	3.36574	2.80267	2.53694	3.45688	2.74078	2.77685	2.36416	2.69193	3.04603	2.88313	4.94417
TCGA_TCGA-DD-A3A2	3.86863	2.35854	2.50213	2.64673	2.62512	2.41586	2.69366	2.45942	2.98932	2.59333	2.80071	2.31757	4.01429	2.51345	6.9274	3.62614	2.4644	4.04116	2.46754	3.15201	2.92737	3.50651	2.48431	3.41384	2.92537	2.54295	3.15491	3.01731	3.20935	2.33367	2.46476	2.92748	2.49679	4.5866
TCGA_TCGA-DD-A3A3	3.56909	2.71266	2.46977	2.66176	2.67149	2.265	2.73917	3.83163	3.59585	2.61929	3.01646	2.41706	4.56955	2.52383	6.71415	7.02339	3.89253	4.60935	2.46754	2.52038	2.94205	4.04955	2.44889	3.40162	5.10702	2.72126	3.38218	2.67523	6.82332	2.33367	2.66978	2.87825	2.50149	4.17058
TCGA_TCGA-DD-A3A5	3.49029	2.32295	2.46197	2.77596	2.61184	2.54841	2.74448	3.10741	3.04865	2.62135	2.84116	2.6388	4.56768	2.5436	6.22434	4.40121	3.47807	4.93743	2.46754	2.6823	3.79295	4.06143	2.70431	3.59955	3.41727	2.57859	3.54101	2.61454	3.59182	2.36329	2.46476	2.82684	3.27966	4.26868
TCGA_TCGA-DD-A3A6	3.70259	3.02136	2.60887	2.84131	4.09136	2.98969	6.1228	3.66266	3.74374	2.59333	3.53752	2.66222	5.30733	2.72378	7.04412	3.54198	5.00611	3.55933	2.46754	3.05608	3.81939	5.47001	2.81449	4.51744	3.73744	2.68564	2.83229	4.04627	4.02238	2.35697	2.46476	3.12172	3.70622	5.70754
TCGA_TCGA-DD-A3A8	3.79029	2.48795	2.78176	2.63819	2.64886	2.3229	2.76421	3.27937	3.02094	2.7742	2.54312	2.32672	4.25619	2.54542	6.50591	3.56172	4.19212	7.29396	2.46754	2.69429	2.72482	3.63313	2.56356	3.13369	3.36711	2.36434	3.54191	2.75524	4.31465	2.359	2.46476	3.20326	3.34343	5.94829
TCGA_TCGA-DD-A3A9	6.34815	2.68536	2.66564	3.04	2.69377	2.3485	3.13388	3.75637	3.14884	2.59333	3.43656	2.93499	4.88722	2.86352	7.44811	6.12501	5.12054	6.34511	2.46754	2.59355	4.46647	5.09937	2.73088	4.67606	3.72525	3.14196	3.26465	2.5677	4.43824	2.3622	2.46476	3.9063	4.44291	5.1707
TCGA_TCGA-DD-A4NI	7.23978	3.49222	3.05921	3.35477	3.10363	3.19994	2.96669	2.63272	3.0141	2.65967	3.85264	3.65719	4.96514	2.70798	7.51173	5.89166	3.17623	3.26006	2.46754	3.14644	4.55139	4.28544	3.24411	4.84652	3.64683	3.17078	3.12398	3.01233	4.37983	2.36912	2.53284	3.47372	3.224	5.06573
TCGA_TCGA-DD-A4NK	3.57656	2.35253	2.48714	2.68863	2.65531	2.76384	2.70846	2.46548	3.39738	2.7793	3.1052	2.341	5.10121	2.54397	5.74618	5.98657	3.27353	3.79568	2.46754	3.13103	2.91396	3.84872	2.98337	3.53026	3.3657	2.68917	3.91891	2.75267	3.47523	2.33367	2.57787	3.90877	3.15066	4.85365
TCGA_TCGA-DD-A4NL	3.0768	2.50956	2.53342	2.75152	2.73426	2.40633	2.90282	2.73089	3.15101	2.59333	3.3703	2.56128	4.95234	2.55638	7.16005	5.10941	3.18199	4.87433	2.46754	2.66008	3.08751	3.91488	3.19677	3.6973	3.53423	2.65952	3.14613	2.68786	6.06961	2.41805	2.46476	2.7627	3.92201	5.82288
TCGA_TCGA-DD-A4NN	2.9844	2.51597	2.49147	2.63895	2.70558	2.27678	2.96247	2.45791	3.17706	2.59333	3.2062	3.52844	4.78167	2.6252	6.28878	6.07708	4.61605	6.27055	2.46754	2.52983	2.84786	4.54982	2.70957	3.3602	3.61768	2.50864	3.19046	2.57495	3.46627	2.57029	2.46476	5.03008	4.44454	5.89602
TCGA_TCGA-DD-A4NP	3.25809	2.32295	3.05112	2.65658	2.68156	2.34577	2.71147	2.50412	3.03832	2.68266	3.00818	2.29675	4.67553	2.62854	5.58426	4.06316	2.69427	3.5364	2.4863	2.96658	3.08329	3.71197	2.59802	3.29941	3.20871	2.43793	3.08325	3.14847	4.34939	2.39699	2.46476	2.75547	2.85603	5.89157
TCGA_TCGA-DD-A4NV	3.50988	2.66224	2.64697	2.9634	2.78298	2.70096	2.89841	2.62516	4.80593	2.66251	3.5568	2.73666	4.8711	2.70671	5.69078	5.49965	3.38105	4.77526	2.46754	2.94844	3.43183	4.20231	3.94761	4.43289	3.91713	2.91642	3.37759	3.42376	4.56521	2.42947	2.55908	3.13747	3.8225	5.51632
TCGA_TCGA-DD-A73A	2.82844	2.90271	2.53931	2.8657	2.76903	2.57629	3.03373	2.60234	3.00645	2.64628	3.34818	2.77552	5.04625	2.52553	8.04776	3.91087	3.5648	6.2384	2.46754	2.75529	3.16808	4.14283	2.81196	4.99473	3.84263	3.67927	3.26034	2.92338	4.25903	2.46777	2.46476	3.03252	3.61293	5.25845
TCGA_TCGA-DD-A73B	4.73488	2.32295	2.49237	2.63524	2.62781	2.57691	2.67072	2.5159	3.13004	2.71209	3.00557	2.29718	5.84143	2.48875	5.95593	4.25374	3.63957	4.08802	2.46754	3.19275	2.67198	3.10739	2.84688	2.89737	3.53985	2.39889	3.10087	2.77942	3.07685	2.43792	2.46476	4.33826	2.99182	4.6285
TCGA_TCGA-DD-A73D	6.10398	2.41438	2.4754	2.61761	2.64654	2.27727	2.70085	2.45241	3.67375	2.6596	2.60708	2.28254	4.05036	2.50356	6.85229	4.19531	3.22237	3.22906	2.46754	2.48466	2.82076	2.91354	2.70783	2.99748	2.92944	2.3135	3.1596	2.49144	2.69198	2.38062	2.46476	3.55228	2.98835	5.58122
TCGA_TCGA-DD-A73G	2.90039	2.84205	2.58213	2.81286	2.69667	2.37186	3.81339	4.50908	3.0099	2.59333	3.5324	2.68131	5.15716	2.57606	5.55599	5.01693	5.26778	3.56087	2.46754	2.79309	3.43324	5.47623	2.87222	3.61374	3.11321	2.44975	4.08038	2.4557	3.13576	2.35738	2.46476	3.27942	2.6349	4.44934
TCGA_TCGA-DD-AAC9	3.3915	3.07921	2.66979	3.08402	2.78139	2.59068	3.11691	3.09641	3.13276	2.6191	3.5383	2.78776	5.32284	2.68054	7.1821	5.15735	3.94839	6.15135	2.48343	2.64474	4.17289	4.66836	2.9988	5.00135	3.67524	3.11657	3.39517	2.56125	5.02513	2.79338	2.56835	2.92384	3.73461	4.59906
TCGA_TCGA-DD-AACC	3.74436	4.83977	3.75891	4.40307	3.89153	3.89342	3.92506	3.63223	3.94962	2.73996	5.37775	5.35055	6.32897	3.25849	6.99676	4.17894	4.12665	8.30446	2.50496	4.20537	6.21639	5.96708	4.04749	7.04004	3.90278	3.50121	3.29202	3.7052	5.36089	2.66731	2.46476	3.53255	3.82497	4.73314
TCGA_TCGA-DD-AACD	4.53922	2.69007	2.54355	2.72379	2.81548	2.50238	2.94494	3.70513	3.07021	2.59333	3.77578	2.41544	5.23276	2.59146	7.74766	5.10641	3.58206	4.06134	2.46754	2.86832	3.12802	4.79264	2.76766	4.53818	3.17809	2.71789	3.14412	2.63639	4.99335	2.36084	2.46476	2.68963	3.01421	4.84091
TCGA_TCGA-DD-AACE	3.9641	2.66222	2.61079	2.88435	2.75064	2.36497	2.67072	2.39986	3.0261	2.59333	3.05037	2.57308	4.2721	2.54016	7.80242	5.59356	2.9963	6.00537	2.46754	2.39684	3.2715	4.04541	2.88225	3.29143	3.62887	2.3973	3.39826	2.62563	3.4644	2.4928	2.46476	4.24618	2.66466	4.38684
TCGA_TCGA-DD-AACF	3.12613	2.57779	2.49116	2.75751	2.91677	2.96012	2.93433	2.51148	3.13414	2.61791	3.9194	2.67259	5.51316	2.57345	5.44153	3.85564	4.28899	3.99592	2.46754	2.80321	3.22702	4.85286	2.97811	4.38825	3.44264	2.72087	3.63778	2.82681	3.62421	3.09659	2.46476	3.93696	2.91486	4.51464
TCGA_TCGA-DD-AACG	3.80484	2.95364	2.52296	3.00605	2.78605	2.63529	2.74903	2.43517	3.28879	2.59333	3.63877	2.69415	4.88882	2.54843	6.25138	4.14216	3.46628	4.52942	2.60645	2.56147	3.5179	5.06274	3.12031	4.28618	3.3237	3.03134	3.67412	2.56027	4.212	2.45424	2.46476	3.0865	2.50733	4.9867
TCGA_TCGA-DD-AACI	3.22303	4.41714	3.25682	3.9229	3.11364	3.27049	3.30785	3.88131	3.23357	2.68448	4.48948	4.20781	6.19359	2.68421	5.87582	5.52108	4.21649	5.78615	4.03258	3.37388	5.21117	5.75268	3.23211	5.78142	3.53667	3.07555	3.45723	3.39031	5.56376	2.51647	2.46476	3.5951	3.31938	4.87086
TCGA_TCGA-DD-AACJ	4.94821	2.4152	2.50641	2.66876	2.66965	2.13527	2.67072	2.46993	3.6542	2.59333	3.09973	2.38438	4.65964	2.49118	7.54124	5.90464	4.27168	4.19709	2.46754	2.49582	2.82314	4.64051	2.85672	3.03222	3.29637	2.4222	4.33315	2.48018	2.98875	2.34971	2.46476	3.0424	2.86958	4.09459
TCGA_TCGA-DD-AACL	4.10528	4.11573	3.26826	3.52689	3.25001	3.28285	3.67007	3.11715	3.04517	2.63964	5.08313	4.17505	6.5219	3.01838	6.70794	5.66069	4.72891	3.787	2.5776	3.48597	5.23082	5.92105	3.24107	5.85111	3.40867	2.81513	3.3042	2.85295	6.3036	2.59683	2.64964	4.56297	3.05159	5.20529
TCGA_TCGA-DD-AACO	3.07225	2.79788	2.57557	3.06755	2.67318	2.47581	2.86851	2.75812	3.50246	2.59333	3.53278	2.52793	4.93797	2.57546	5.73368	5.37035	3.31849	3.36743	2.46754	2.89024	3.55051	5.23511	2.7791	4.6229	2.87656	2.57863	3.65557	2.5153	3.71152	2.52864	2.46476	2.83088	3.00854	4.51761
TCGA_TCGA-DD-AACQ	2.83694	2.3653	2.50388	2.63508	2.64329	2.19847	2.67072	2.53635	3.65424	2.61366	2.45144	2.61054	4.21125	2.46524	4.63911	6.03446	3.58434	3.11505	2.46754	2.4594	2.96972	3.65026	2.59784	2.65089	4.61973	2.35677	4.26377	2.62281	2.93729	2.43702	2.46476	3.05512	2.91028	4.41465
TCGA_TCGA-DD-AACT	2.79852	2.75379	2.63282	2.84446	2.92541	2.83992	2.91995	4.08304	3.40616	2.67465	3.2962	2.97671	4.98338	2.60051	6.17167	4.9203	2.9402	4.94787	2.46754	3.33655	3.75819	4.6935	2.8271	4.4927	4.34077	2.94859	3.56802	3.01012	6.40729	2.41895	2.46476	4.16827	2.72952	4.99097
TCGA_TCGA-DD-AACV	3.05813	2.3602	2.49367	2.67774	2.69293	2.74629	2.67072	3.25142	3.09246	2.66342	3.00225	2.33607	4.15553	2.52547	5.38191	4.99181	3.81197	2.90947	2.59266	2.84282	2.84892	3.35576	3.05758	2.92462	5.12393	2.45739	4.33171	2.71274	3.56387	2.47598	2.46476	3.1674	3.02103	4.35909
TCGA_TCGA-DD-AACW	3.87008	2.57102	2.52975	2.86542	2.78215	2.52944	2.85199	2.4676	3.48109	2.65092	3.31608	3.11076	4.65189	2.62186	5.86473	2.8586	3.14605	7.57583	2.46754	2.90799	3.58405	4.35366	2.77896	4.62767	3.47782	3.09167	4.07255	3.07597	3.40617	2.33367	2.46476	3.93162	2.61125	5.43996
TCGA_TCGA-DD-AACY	6.101	2.42179	2.50499	2.84545	2.70371	2.34313	2.79536	3.22879	3.45577	2.59333	3.29759	2.61015	4.70321	2.58508	6.14798	5.62275	3.12906	5.99268	2.46754	2.65841	2.94508	3.72679	2.81215	4.05157	3.21202	2.93327	3.50223	2.58996	3.95488	2.73775	2.46476	3.82261	3.24903	4.78613
TCGA_TCGA-DD-AAD2	6.05427	3.26291	2.66592	3.23891	2.7639	3.34984	2.95486	3.01903	3.03993	2.62764	4.12704	3.49893	5.92558	2.81739	6.10252	5.45787	3.7663	5.49982	2.46754	2.76152	3.66315	5.38528	3.32754	4.97961	4.70519	3.50913	3.40428	2.72715	4.83255	3.06641	2.46476	3.56313	4.34425	5.46166
TCGA_TCGA-DD-AAD3	3.62445	2.93544	2.72033	3.11306	3.06172	2.81072	2.70656	2.67753	3.15621	2.59333	4.03367	2.93031	5.12869	2.72471	6.185	4.28987	3.68169	3.28267	2.46754	2.65414	3.70894	5.44455	3.60736	4.94439	3.93618	3.31435	3.65266	2.62539	4.70913	2.80722	2.46476	4.06846	4.03904	5.68935
TCGA_TCGA-DD-AAD6	3.67781	2.81824	2.47305	2.67992	2.89476	2.18968	2.76677	2.44337	3.03115	2.59333	3.24155	2.308	4.59051	2.52765	6.37007	4.4327	3.13136	6.48507	2.49024	2.93992	2.77487	3.67089	3.04894	3.22045	3.00251	2.6492	3.40767	2.47896	4.74483	2.33367	2.46476	2.53487	2.68231	5.66003
TCGA_TCGA-DD-AAD8	2.95445	2.753	2.65904	2.80232	2.94958	2.80318	2.71493	2.54748	3.0495	2.65863	3.22915	2.57453	4.75165	2.60863	5.51578	5.03891	3.98721	4.3312	2.50791	2.78265	3.25135	4.71535	2.97443	3.36982	3.69212	2.61951	4.38912	2.82557	4.21876	2.61177	2.46476	4.30671	3.2563	4.63151
TCGA_TCGA-DD-AADA	2.99693	2.94714	2.69648	3.15264	2.68114	2.5303	3.11387	3.04981	3.27675	2.61607	3.29468	2.91743	4.94696	2.56568	6.42081	4.12285	3.32386	6.2881	2.48156	3.11457	3.99242	4.46526	3.05862	5.2062	3.95888	3.28099	4.02098	2.97952	3.94765	2.35772	2.46476	4.82262	3.26915	4.75813
TCGA_TCGA-DD-AADF	3.16124	3.45913	2.75008	3.04273	2.6692	2.34869	3.06022	2.61431	3.07632	2.59333	3.02848	3.79412	4.33039	2.60073	6.21428	4.48827	3.60423	3.14759	2.51303	3.41729	4.21348	3.87129	2.76693	3.68126	3.18254	2.5094	3.03862	2.59407	3.32057	2.36005	2.46476	3.36384	2.66306	3.50645
TCGA_TCGA-DD-AADI	3.29495	3.21393	2.74791	3.16924	2.75295	3.0213	3.06065	2.77515	3.69023	2.59333	4.3747	3.23521	5.60126	2.72494	6.32402	4.90354	4.53283	4.38454	2.46754	3.42676	5.22093	5.24857	3.43699	6.58654	4.27284	3.75525	3.5927	3.18938	5.06133	2.67771	2.59199	4.26664	3.76375	5.39741
TCGA_TCGA-DD-AADJ	2.75591	2.77531	2.501	2.72664	2.66261	2.37524	2.79752	2.51235	3.10724	2.59333	3.36259	2.61575	4.33317	2.62481	5.72206	4.99019	3.8626	5.41038	2.75389	2.67706	3.32123	4.38108	2.64674	4.63385	3.22993	2.84916	3.60801	2.4462	3.288	2.40211	2.46476	3.35123	2.79398	4.76149
TCGA_TCGA-DD-AADK	2.85298	3.11627	2.78639	3.10783	2.76985	2.57842	3.06056	3.47693	3.8119	2.59333	3.42457	2.81907	5.16214	2.76759	6.18082	4.82167	3.95963	2.85693	2.47586	2.77086	4.25739	4.71911	2.96687	5.02271	4.64736	3.29206	3.73698	2.61673	5.13687	2.38973	2.51926	3.72199	3.92981	4.88112
TCGA_TCGA-DD-AADM	3.13899	2.94261	2.58024	2.86503	2.68674	2.37913	2.93471	2.42906	3.44048	2.61795	3.18662	2.62893	4.89008	2.65996	7.58452	5.01149	3.53286	4.24104	2.46754	2.55946	3.33462	4.43087	2.97881	3.78993	3.10695	2.86661	3.53757	2.57359	3.62375	2.4808	2.56375	3.22808	3.09164	4.37106
TCGA_TCGA-DD-AADN	2.96109	4.08102	3.14384	3.56685	2.76107	3.09799	3.53749	3.11945	3.03627	2.95095	4.4424	4.33739	5.654	2.91537	6.43885	4.90453	4.09769	7.29154	2.49239	3.67451	5.52559	5.8802	2.90014	5.6233	2.88173	2.76212	3.46988	3.41936	3.97387	2.41695	2.46476	3.32501	2.36536	4.47007
TCGA_TCGA-DD-AADO	2.65589	4.41513	3.21863	3.60734	3.01924	3.06846	3.69491	3.22525	3.08412	2.59333	4.13535	3.88726	5.37712	2.81494	4.91598	4.66745	4.32406	3.09153	2.48278	3.04263	5.13194	5.24535	3.27391	5.40065	4.25409	3.10588	2.89776	2.6107	4.14378	2.45822	2.46476	3.41317	2.63503	4.3841
TCGA_TCGA-DD-AADQ	3.12916	2.99979	2.62677	2.92366	2.75348	2.33963	3.13291	3.78546	3.21682	2.61728	3.09119	2.88891	4.46692	2.54541	7.30898	4.11661	3.74695	5.89157	2.46754	2.76983	3.4447	3.94466	2.78512	3.77905	3.10201	2.62256	3.00524	2.65668	7.98769	2.43145	2.46476	2.92813	2.76064	4.93907
TCGA_TCGA-DD-AADR	2.92317	2.87459	2.54461	2.7654	2.67168	2.68855	2.89286	2.48966	3.57819	2.64494	3.31753	2.41759	4.78969	2.57963	6.61762	3.74052	2.96594	4.06335	2.46754	2.82482	3.40085	4.43406	2.82701	4.49149	3.2527	3.15792	3.35808	3.29861	3.70492	2.43965	2.46476	2.97502	2.8211	4.40157
TCGA_TCGA-DD-AADS	3.52191	3.7723	2.82539	3.18698	2.82414	2.64951	3.03546	2.60338	3.17494	2.59333	3.88674	3.40865	5.20989	2.58313	5.32915	5.37978	3.2412	6.2631	2.46754	2.62464	4.5674	5.24582	2.96345	4.521	3.06865	2.6339	3.18226	2.41922	3.414	2.4429	2.46476	2.85284	2.52606	4.10602
TCGA_TCGA-DD-AADU	4.51799	2.92828	2.88335	2.84553	2.79164	2.24379	2.73021	2.67944	3.1365	2.61582	3.12502	2.47976	4.44195	2.51611	7.0217	6.18793	3.63245	5.39206	2.46754	2.529	2.68491	3.75136	2.5556	3.30844	2.91013	2.36127	3.66476	2.57753	3.65664	2.40344	2.46476	3.27349	2.50396	5.2552
TCGA_TCGA-DD-AAE0	3.2656	3.09741	2.7073	2.91889	2.89057	2.66582	3.16286	2.98261	3.53235	2.59333	3.69558	3.17716	5.22544	3.52829	6.34068	5.7597	4.4669	3.62625	2.46754	3.52526	3.85395	5.3606	2.72741	4.22074	3.84475	2.44868	3.09255	2.62468	3.82566	2.63993	2.46476	4.04502	3.63692	6.21374
TCGA_TCGA-DD-AAE1	2.48758	2.84682	2.50862	2.96788	2.63648	2.32157	2.75372	2.50811	3.62917	2.59333	3.18405	2.45179	4.56105	2.58667	5.36579	5.76266	3.73351	5.4757	2.56175	2.70104	3.20458	4.28485	2.72529	4.35344	3.44692	3.16599	4.12568	2.81025	3.25827	2.65241	2.46476	4.1643	2.89485	5.13657
TCGA_TCGA-DD-AAE2	2.685	3.32031	3.06815	3.34018	2.97257	3.3519	3.26875	2.62853	3.14406	2.6148	3.94418	4.0243	5.23602	2.70815	5.64282	5.18951	3.71112	3.28553	2.59305	3.33253	4.55112	4.77655	3.34262	4.98449	3.7681	2.86485	3.4578	3.07366	4.55694	2.50274	2.46476	3.44986	3.68536	5.37454
TCGA_TCGA-DD-AAE3	3.23454	2.52753	2.48896	2.64355	2.70327	2.73014	2.67072	2.50339	3.21734	2.68201	3.44725	2.34787	4.59881	2.48265	7.78299	5.47867	3.76676	7.85508	2.46754	2.68748	2.65653	4.47988	2.96862	4.11958	3.4	2.3773	3.0744	2.58467	3.888	2.51177	2.46476	2.61036	2.97579	4.82761
TCGA_TCGA-DD-AAE4	3.05462	3.4558	2.75489	3.36582	2.74934	3.61498	2.92948	2.76672	3.52318	2.6242	4.17192	3.34143	5.38215	2.66092	7.18337	5.49952	3.61805	8.10935	2.46754	3.5579	4.59784	5.25558	2.99364	5.68969	3.6931	3.00164	3.33881	2.63327	4.56538	2.48727	2.46476	3.53888	3.05348	4.39166
TCGA_TCGA-DD-AAE6	2.89463	2.34687	2.4688	2.63715	2.61184	2.15463	2.67072	2.45311	3.45975	2.61608	2.63271	2.24184	4.0227	2.49129	6.18103	4.98638	2.59447	7.29397	2.46754	2.39093	2.71569	3.75107	2.61658	2.56217	3.29616	2.36183	4.21926	2.52775	2.55167	2.35774	2.46476	4.37382	2.59375	4.23432
TCGA_TCGA-DD-AAE7	2.72251	3.00362	2.58759	2.89585	2.6739	2.57317	2.7757	2.53626	3.48644	2.78414	3.47349	2.98239	5.21857	2.61816	6.5959	5.88364	3.34265	8.46276	2.63079	2.83906	4.17636	4.26709	2.77009	4.83486	3.38227	2.96071	2.99139	3.04446	4.24016	2.41711	2.62615	2.93122	2.89397	5.19398
TCGA_TCGA-DD-AAEA	5.6394	3.76923	2.80711	3.23488	2.77125	2.66717	3.05861	2.67136	3.14608	2.67832	3.61804	3.84792	5.02926	2.6064	7.21573	4.38349	3.55301	7.7	2.46754	3.11462	4.36018	4.56444	3.04805	4.4793	4.15809	2.59778	3.8411	3.21513	4.03128	2.65131	2.46476	3.72365	3.07	4.19684
TCGA_TCGA-DD-AAEB	3.88077	2.63074	2.68809	2.66143	2.69013	2.26378	2.83261	2.6918	3.13269	2.61909	2.80482	2.37526	4.47424	2.6307	7.11034	4.66264	3.46845	6.12239	2.48342	2.64463	2.88588	3.72362	2.64859	3.39593	2.83721	2.4922	3.62846	2.58046	3.00396	2.3609	2.46476	2.89973	2.57055	5.09171
TCGA_TCGA-DD-AAED	3.24547	3.05751	2.52917	2.84908	2.73487	2.39697	2.71477	2.95671	3.06101	2.6584	3.51716	3.16041	4.91393	2.46524	5.7595	5.69064	3.58339	4.21661	5.39745	2.62034	2.93448	4.95333	2.90284	3.44019	3.78386	2.64429	4.6697	2.62295	3.28752	2.52654	2.59676	3.97872	2.35766	5.32609
TCGA_TCGA-DD-AAEG	2.47746	2.34438	2.47417	2.66933	2.70404	2.44305	2.91564	3.06259	3.3464	2.59333	2.64914	2.31444	4.3211	2.5664	6.37603	3.52135	3.36789	2.83164	2.4801	2.59045	2.84315	4.84502	2.59821	3.13621	5.51039	2.4947	3.21162	2.60848	3.73801	2.54915	2.46476	3.90318	3.70193	4.8156
TCGA_TCGA-DD-AAEH	4.61982	3.58514	3.18855	3.74051	2.75109	3.21882	3.46298	3.00362	3.65192	2.67237	3.90168	4.2249	5.08354	2.91372	6.38799	5.35705	3.70728	5.48454	2.46754	3.86525	5.31882	4.51539	3.59574	5.84289	3.58392	3.39503	3.59864	3.28177	4.67372	2.86194	2.57266	3.55624	3.28058	5.41103
TCGA_TCGA-DD-AAEI	3.04605	2.55119	2.55774	2.87511	2.81816	2.53486	2.7933	2.60621	3.4355	2.64074	3.94738	2.66309	5.57478	2.60755	7.69496	3.4353	3.37784	7.05255	2.48228	2.55413	3.28444	4.99991	3.38122	4.06682	3.96263	2.93879	3.37213	2.73869	4.04951	2.81523	2.56093	3.08196	3.22326	4.97823
TCGA_TCGA-DD-AAVQ	2.91292	4.39071	3.16078	4.21801	3.11218	3.33309	3.38719	3.33238	3.26139	2.6382	4.78954	4.42584	6.07467	3.30074	4.62528	5.90948	4.77447	5.92645	2.50883	3.15998	6.02142	5.85396	3.61396	6.79708	5.73717	4.09103	4.47406	2.84096	5.63084	2.53126	2.55578	4.3445	3.74028	5.18564
TCGA_TCGA-DD-AAVR	3.06967	3.54929	2.5896	3.36796	3.03422	3.21289	3.211	3.28944	3.15405	2.64072	4.39421	3.35821	5.60249	2.8049	5.44824	3.77392	4.34263	4.16124	2.48227	2.8729	4.34915	5.22968	3.25897	6.15662	3.94537	3.75852	3.15617	2.77033	4.98171	2.62185	2.46476	3.32774	4.39367	5.40324
TCGA_TCGA-DD-AAVU	5.53147	2.32295	2.52429	2.61761	2.61184	2.28918	2.67072	2.46215	3.20837	2.59333	3.11568	2.31338	4.72788	2.48063	7.16887	4.77352	3.35426	3.10394	2.46754	2.55854	2.67779	4.16377	2.87383	3.17772	3.80985	2.52185	3.91228	2.52558	3.06128	2.33367	2.46476	2.71313	2.38089	3.97485
TCGA_TCGA-DD-AAVX	3.10435	2.7163	2.52124	2.78085	2.73293	3.46102	2.77572	2.72771	3.29115	2.63369	3.42873	2.53097	5.10877	2.69642	6.12029	5.33652	3.32717	6.92118	2.46754	3.35791	3.76065	4.45182	2.86694	4.88887	3.27275	3.16121	3.24078	2.77636	4.50468	2.41712	2.46476	2.7089	3.0439	5.30265
TCGA_TCGA-DD-AAVY	3.13424	2.37323	2.55886	2.73681	2.78813	2.53921	2.79471	3.43471	3.09873	2.64132	3.05932	2.57763	4.50524	2.49294	5.80573	5.48041	3.10236	6.3378	2.49717	3.67654	2.89321	3.62654	2.94635	3.40539	3.35019	2.36485	4.40564	2.74223	3.95642	2.33367	2.46476	3.23554	2.97104	5.24086
TCGA_TCGA-DD-AAW1	3.50779	2.36849	3.61092	2.63641	2.71063	2.61389	2.70011	2.73054	3.01713	2.65798	3.12242	2.37401	4.36749	2.57355	5.94605	3.64575	2.81449	6.09248	2.48103	2.52475	2.88673	4.13113	2.96448	3.22695	2.91578	2.48727	3.68073	2.57349	5.47961	2.46537	2.46476	3.15233	2.89067	5.93031
TCGA_TCGA-DD-AAW3	4.28827	2.36017	2.50396	2.67769	2.63946	2.21481	2.71814	2.39986	3.1169	2.59333	2.94026	2.36538	4.31736	2.46524	6.1139	3.63936	2.83451	4.68028	2.48942	2.65869	3.1815	3.46606	2.74513	3.60267	3.04987	2.66589	3.47715	2.55939	3.88546	2.37111	2.46476	3.0089	3.40644	5.64833
TCGA_TCGA-ED-A4XI	3.03279	2.71872	2.64279	2.98117	2.87738	3.22032	3.26213	3.0258	3.24422	2.70784	4.32902	2.70098	5.47889	2.61816	6.44148	3.01631	3.57041	6.38967	2.51074	3.50161	4.04878	5.30678	3.06151	5.28698	3.60618	3.3238	3.4863	3.16478	4.66572	2.65718	2.46476	3.43571	3.44744	5.68798
TCGA_TCGA-ED-A627	3.39821	4.17066	3.28116	4.1233	3.17641	3.50971	3.29807	3.93883	3.0679	2.67512	5.06529	4.49165	5.96856	2.85164	7.43694	5.55582	3.68368	4.77801	2.46754	3.85945	5.67168	6.0925	4.1354	6.34821	4.03704	4.08201	3.24816	3.26585	5.87838	2.52367	2.46476	3.40304	3.84023	6.16946
TCGA_TCGA-ED-A7PY	2.99729	2.64145	2.52298	2.64743	2.66533	2.26597	2.76153	2.51814	3.30389	2.59333	3.01403	2.49512	4.27684	2.50491	7.46699	4.35109	3.07685	6.74917	2.46754	2.63315	3.17124	3.69621	2.5417	3.59653	3.90514	2.54789	3.72153	2.60828	3.10413	3.66393	2.46476	6.18033	2.74219	5.17209
TCGA_TCGA-ED-A7XO	5.08958	2.88265	2.67988	2.90341	2.97089	2.86995	2.79149	2.79629	3.49691	2.59333	4.14129	3.03618	4.96768	2.64828	6.13537	5.12602	4.20012	4.14993	2.46754	3.80331	4.21652	4.7087	3.05314	4.78605	4.89972	2.82829	3.83939	2.90415	5.31564	2.83013	2.46476	3.2305	3.47975	4.73014
TCGA_TCGA-EP-A26S	3.95014	2.41353	2.66752	2.70639	2.69273	2.42799	2.67072	2.55735	3.72743	2.72975	3.40894	2.32081	4.80169	2.54459	5.86615	3.80365	3.31475	5.28635	2.46754	2.54134	2.90552	3.56383	2.91717	3.65089	3.61642	2.61038	4.1201	2.66272	3.94572	2.45893	2.46476	2.71733	3.40515	5.79095
TCGA_TCGA-EP-A2KA	3.67069	4.52453	3.0997	3.80764	3.12255	3.0368	3.7113	2.93995	3.04471	2.70555	4.28878	4.04037	5.59749	2.71494	6.62745	3.75158	3.70189	6.15565	2.48184	2.95333	5.20923	6.8318	3.11559	5.22286	3.417	3.61015	3.73127	2.97559	4.25477	2.75526	2.55805	3.3472	3.25675	5.33696
TCGA_TCGA-EP-A2KB	3.66496	2.91477	2.6033	2.85637	2.8079	2.42161	2.7189	2.48327	3.02345	2.66448	3.2232	2.72807	4.31478	2.49626	6.37898	3.75168	3.10043	5.87275	2.46754	2.69307	3.5275	3.98135	2.74382	3.76045	5.14916	2.61501	3.94257	2.67949	3.27674	2.47805	2.46476	4.13074	3.04875	4.58375
TCGA_TCGA-EP-A2KC	5.22586	2.8869	2.58846	3.07357	2.82174	2.65984	2.70093	3.20922	3.47931	2.59333	3.24029	2.61513	5.57291	2.6979	6.21214	4.74097	3.74356	4.31945	2.46754	2.5291	3.55406	5.06145	2.82808	4.03944	3.77096	2.88476	4.12311	2.70608	5.32783	2.51022	2.46476	3.77818	3.52471	5.59263
TCGA_TCGA-EP-A3JL	3.43842	3.44951	2.75797	3.22465	2.84329	2.98147	3.1971	2.7953	3.00685	2.61369	4.04857	3.51088	5.81394	2.77837	6.28061	4.25742	4.34529	4.45502	2.46754	2.94078	4.19618	5.11585	3.34009	4.92399	4.20749	3.36479	3.50257	2.88003	5.53566	2.51302	2.46476	3.41933	4.37595	4.75925
TCGA_TCGA-ES-A2HS	3.89083	2.34605	2.46857	2.63648	2.62894	2.2406	2.8102	2.50015	3.04905	2.63693	2.96146	2.24184	4.55584	2.4779	5.78832	4.64472	3.2994	4.00331	2.46754	2.46727	2.62269	3.81996	2.59438	3.1135	3.51227	2.40469	3.63793	2.4372	2.88143	2.37964	2.46476	2.7519	3.00017	4.41005
TCGA_TCGA-ES-A2HT	2.92833	2.56283	2.49931	2.72204	2.7071	2.48796	2.87079	2.75818	3.11257	2.59333	3.09581	2.57604	4.74053	2.60232	6.33207	5.26743	3.4696	3.96058	2.46754	2.74055	3.1443	4.77314	2.80493	3.96391	3.38362	3.00699	3.29779	2.53385	3.66678	2.70302	2.53765	3.60349	3.15342	4.08911
TCGA_TCGA-FV-A23B	2.88601	3.25337	2.97186	3.44698	3.01784	2.73678	2.84433	2.72176	3.24837	2.63284	3.94259	3.03674	5.16289	2.6349	7.25156	3.25103	4.02352	5.72964	2.49192	2.69936	4.01575	4.20996	3.13224	4.80114	3.48025	3.41972	3.60198	2.9071	4.22458	2.45396	2.46476	3.10915	4.37819	5.63669
TCGA_TCGA-FV-A495	2.96574	3.27082	2.72996	3.19349	2.76749	2.96513	3.21399	2.92597	3.11876	2.59333	3.74288	3.40501	5.41984	3.03967	5.82517	3.72618	4.78347	6.2698	2.48385	3.06736	4.87969	5.84918	2.93584	5.39532	3.92055	2.81643	3.87151	2.87064	4.57682	2.41539	2.46476	3.16553	3.19361	4.66585
TCGA_TCGA-FV-A496	3.24208	2.36747	2.4874	2.63598	2.61184	2.25333	2.69945	3.15869	3.02402	2.61472	2.50624	2.33601	4.07228	2.50178	6.47652	5.21214	3.46318	5.62679	2.48073	2.35707	2.75826	3.10529	2.51591	2.88201	4.91177	2.38093	3.75516	2.64805	3.15019	2.37845	2.46476	3.44064	3.08873	4.72374
TCGA_TCGA-FV-A4ZP	2.81874	3.50494	2.89046	3.19008	2.85374	2.84647	3.29089	2.71959	3.0629	2.59333	3.75447	4.55788	5.53241	2.78967	6.42982	3.61371	4.49698	4.5374	2.46754	2.73565	4.80677	6.48754	3.33788	4.08014	2.71197	2.36912	4.20434	2.41922	3.88395	2.46551	2.46476	3.09977	2.70792	5.10451
TCGA_TCGA-G3-A25U	2.56134	2.37109	2.48268	2.6375	2.90096	2.57564	2.67072	2.45404	3.50393	2.70539	3.00427	2.3625	4.31898	2.60331	5.88815	4.84056	3.43046	7.34696	2.46754	2.59117	2.97447	3.57233	2.75312	3.19596	4.17497	2.40941	4.09471	2.79079	3.02659	2.42832	2.46476	3.80227	3.04664	5.1204
TCGA_TCGA-G3-A25V	2.39595	3.2913	2.64115	3.22573	2.66579	2.82857	2.76228	2.57945	2.97658	2.6625	4.05007	2.97302	5.56391	2.93737	5.31041	4.14656	3.91998	2.59349	2.46754	2.82076	3.78631	4.90651	3.30593	4.96071	3.97804	3.56499	3.13947	2.65198	6.86726	2.72535	2.46476	2.81824	4.15436	5.66992
TCGA_TCGA-G3-A25X	2.84962	4.48278	2.85142	3.52758	3.16446	3.24435	3.35134	3.509	3.19073	2.71656	4.94977	3.95559	6.22862	2.76	6.65675	6.02048	5.61322	6.64258	2.58749	3.0091	4.6885	6.3581	2.95573	5.20894	3.03079	2.71592	3.47843	2.72427	6.75085	2.6593	2.46476	3.55543	3.46389	6.18805
TCGA_TCGA-G3-A25Z	4.19838	2.83957	2.57487	2.8831	2.82314	2.66564	2.73918	2.46047	3.39785	2.61069	3.63006	2.51798	5.08771	2.60594	5.98362	3.42726	3.34408	5.12397	2.48883	2.46877	3.08071	4.35624	2.75979	3.74753	3.11941	2.54662	3.18874	2.41922	4.9095	2.50418	2.46476	3.20394	3.82646	4.50439
TCGA_TCGA-G3-A3CG	3.26997	2.9121	2.66883	2.99103	2.75405	2.45108	3.0025	2.47413	3.11455	2.62531	3.08618	2.47721	4.48746	2.63631	6.10231	4.01713	3.60907	3.39406	2.48726	2.51434	3.52776	5.86269	2.82751	4.03852	3.36843	3.05181	2.8398	2.47118	3.84869	2.54965	2.46476	3.03197	4.20162	5.08914
TCGA_TCGA-G3-A3CH	3.47148	2.66357	2.53695	2.88773	2.66603	2.88937	2.97315	2.84519	3.6518	2.89112	3.73391	4.28115	5.15854	2.67476	6.2502	5.16694	4.02162	4.03818	2.46754	2.78789	3.83027	4.80916	3.00197	4.73155	4.4921	3.07989	3.70759	2.91387	3.96263	2.47481	2.46476	3.543	3.71897	5.45729
TCGA_TCGA-G3-A3CI	3.59925	2.80403	2.59516	2.84063	2.68421	2.49106	2.79262	2.60512	3.19988	2.6171	3.68346	2.77993	7.31281	2.70969	7.06695	3.9225	3.38234	7.99856	2.46754	2.99421	3.59025	5.19928	2.92634	4.14311	3.43556	2.65729	3.12542	3.44418	4.29636	2.60104	2.56037	2.92504	3.34411	4.70325
TCGA_TCGA-G3-A3CJ	3.05243	2.34436	2.48618	2.65232	2.76165	2.32095	2.75063	2.47063	3.60621	2.61369	3.0015	2.38169	4.41658	2.58748	6.33815	3.95936	4.11974	5.95613	2.46754	2.60246	2.86525	4.06051	2.68458	3.8423	2.77765	2.3135	3.12339	2.5008	5.54883	2.53116	2.62648	2.95051	2.99485	5.1197
TCGA_TCGA-G3-A3CK	3.01611	3.88523	3.13358	3.54192	3.09089	3.1102	3.03945	2.746	3.48456	2.77489	3.96973	4.06352	5.20535	2.66738	5.59466	3.51102	3.60721	5.77847	2.46754	2.99794	4.42495	4.53491	3.43084	4.39013	3.44179	2.58514	3.26062	2.58451	5.45527	2.63505	2.46476	3.58647	3.28312	5.93461
TCGA_TCGA-G3-A5SI	3.24011	2.32295	2.4801	2.64361	2.74683	2.14832	2.67072	2.47028	3.36496	2.59333	2.91004	2.29649	4.30775	2.4827	6.05715	5.41993	3.31298	7.31195	2.46754	2.48642	2.61554	3.23126	2.84542	2.91884	3.42527	2.34602	3.1257	2.46843	3.09737	2.48451	2.46476	4.08404	3.34978	4.26462
TCGA_TCGA-G3-A5SJ	2.50673	4.49829	3.3708	3.82226	3.67015	3.17549	3.41356	3.66664	3.25282	2.67011	4.39974	3.70471	5.39696	2.83113	6.0595	4.80912	4.58423	2.86207	4.20827	2.79982	5.02465	5.71894	3.62571	5.41763	4.0087	3.31873	3.52093	2.74753	5.89289	3.16704	2.46476	3.66103	3.90138	6.3626
TCGA_TCGA-G3-A5SK	2.89772	2.77485	2.68676	2.787	3.1262	2.88162	2.77329	2.49078	3.5177	2.79141	3.65711	2.60296	4.46254	2.56726	7.23699	5.36038	2.76576	8.53891	2.48381	3.35367	3.44165	4.24615	2.90625	4.38263	3.03594	2.76316	3.21533	4.02524	4.0025	2.5381	2.46476	3.85201	2.49077	4.35187
TCGA_TCGA-G3-A5SM	6.45368	3.15101	2.86268	3.1334	2.99652	2.98583	2.90987	2.73242	3.3133	2.59333	3.89603	2.8896	5.27978	2.77004	7.77819	6.89389	3.87724	5.64167	2.53699	2.77312	4.07926	5.56767	3.14399	4.6237	3.61512	2.83864	3.3606	2.68156	4.71498	3.1851	2.53153	3.49415	4.51822	5.20338
TCGA_TCGA-G3-A6UC	2.94799	2.40235	2.47742	2.66151	2.76391	2.37395	2.80252	2.39986	3.72655	2.61914	3.02192	2.28855	4.66709	2.5235	6.21056	3.79609	2.98898	3.42577	2.55965	2.61513	3.03947	3.41643	3.02497	3.30845	3.54364	2.58143	3.79529	2.61868	4.6664	2.43874	2.46476	3.0049	3.36476	5.63969
TCGA_TCGA-G3-A7M5	3.09864	2.77591	2.51592	2.83432	2.68202	2.80945	2.76075	2.55323	4.71043	2.72608	3.069	2.80293	4.54712	2.54243	6.90954	4.59703	2.99999	4.41442	2.48174	2.69571	3.24748	3.79938	2.79471	3.66424	3.31951	2.55578	3.35308	2.77401	3.31745	2.53459	2.46476	3.41667	2.70081	3.73182
TCGA_TCGA-G3-A7M7	3.02972	2.44743	2.50582	2.70049	2.66889	2.18025	2.76742	3.1208	3.27891	2.61814	2.86763	2.35036	4.56171	2.49364	6.69564	5.48032	3.35939	5.74629	2.51278	2.85419	2.87461	3.909	2.62339	3.34026	3.88328	2.75848	2.93461	2.43953	6.51049	2.38549	2.46476	3.06071	3.74435	4.60889
TCGA_TCGA-G3-A7M8	2.68806	2.45439	2.47509	2.65497	2.8168	2.62614	2.67072	2.39986	3.42059	2.59333	3.50679	2.44225	4.94948	2.56223	5.09293	5.0306	2.69687	3.22506	2.46754	2.61925	2.88729	4.5423	2.81955	3.87089	3.39284	2.33709	3.06001	2.60612	3.68015	2.42348	2.46476	3.45144	3.4442	4.93804
TCGA_TCGA-G3-AAUZ	3.22735	3.22847	2.66727	3.1353	2.73375	2.79649	3.01338	2.46334	3.35373	2.59333	3.74801	3.38799	4.89061	2.67877	6.05557	5.68379	4.14963	7.31485	2.48433	2.81576	4.12799	5.1189	2.94039	4.8513	3.65967	2.7927	4.14151	2.62899	4.00611	2.33367	2.46476	2.85739	3.12914	4.54941
TCGA_TCGA-G3-AAV0	2.94448	2.54794	2.62744	2.78547	2.63218	2.42811	2.83476	2.51816	3.16968	2.59333	2.90131	2.89532	4.233	2.57997	4.24029	3.95121	2.8775	3.94088	2.46754	2.73411	3.33326	4.0301	2.52454	3.48102	3.70987	2.5843	3.73652	2.71286	2.90461	2.38819	2.46476	2.92944	2.62935	3.80418
TCGA_TCGA-G3-AAV2	3.33109	2.42692	4.88747	2.63964	2.63181	2.53158	2.77055	2.45974	3.23257	2.78622	3.25397	2.31063	4.90079	2.52313	5.59594	3.72947	4.32419	2.84314	2.46754	2.53502	2.79891	4.0241	2.84452	3.31421	3.28731	2.46802	3.36741	2.59875	4.7527	2.53288	2.46476	3.6679	3.4117	5.62017
TCGA_TCGA-G3-AAV5	3.55103	3.08995	2.54764	2.87696	2.70183	2.37105	2.79764	2.68678	3.45028	2.59333	3.27212	2.66416	5.00089	2.54285	7.21099	4.75183	3.96232	5.98258	2.46754	2.66627	3.48697	3.90154	2.90894	3.81543	2.8776	2.66986	3.64379	2.60404	4.91575	2.7478	2.46476	3.99605	2.96666	4.40604
TCGA_TCGA-HP-A5MZ	3.46952	3.62092	2.89639	3.30878	3.082	3.00691	3.19282	2.80522	3.06822	2.65535	4.22976	3.20763	6.05693	2.92806	7.39412	4.15135	5.0497	6.79363	2.63576	3.2732	4.17175	5.24476	3.68634	5.40936	4.76524	3.8376	3.44488	2.78675	5.61468	2.73684	2.46476	3.47806	5.12971	5.66233
TCGA_TCGA-HP-A5N0	2.80719	2.35222	2.50311	2.71035	2.71659	2.87857	2.84484	2.58275	3.10695	2.75258	3.62405	2.47023	5.21087	2.6156	5.98451	4.90782	4.58826	4.05112	2.46754	3.22084	3.09572	4.74869	2.93513	4.65336	3.97297	2.70609	4.18415	3.21275	4.37174	2.76608	2.46476	3.96863	4.37997	5.96974
TCGA_TCGA-K7-A5RF	4.96342	2.84991	2.77826	3.33859	3.47514	3.54661	2.99533	3.25657	3.42781	2.64399	4.69757	3.3463	5.29	2.73758	6.68487	5.63483	3.37158	4.5318	3.23815	3.39181	4.5966	5.78752	3.20851	5.33107	3.23399	3.10002	3.30473	2.79223	4.98139	2.93725	2.46476	3.01143	3.1313	5.24479
TCGA_TCGA-K7-A5RG	3.75122	5.5049	4.53634	5.08544	3.81292	4.64136	4.07206	3.9438	3.07865	2.7629	5.3448	5.56635	6.524	3.60421	6.19707	4.26986	4.39349	5.96734	2.58748	4.44741	6.68998	5.62198	4.30957	6.56394	4.54904	3.90658	3.57445	3.73426	5.42494	2.96696	2.46476	4.18823	4.48053	5.26058
TCGA_TCGA-K7-A6G5	2.8267	3.01149	2.58638	3.03232	2.87313	2.80434	2.96986	3.81632	3.54195	2.61659	3.73572	2.99826	5.07033	2.59203	5.65316	4.0972	3.69172	5.93488	2.49602	2.68582	3.84057	4.61574	3.17738	4.54045	3.57652	2.65102	3.55078	2.56539	5.05982	2.42873	2.46476	2.89459	3.365	5.09943
TCGA_TCGA-KR-A7K0	3.35118	2.73536	2.77091	2.77787	2.99316	2.34795	2.88373	2.68297	3.27952	2.69021	3.57732	2.51924	5.10947	2.62534	6.21281	5.70815	3.99118	2.69835	2.59819	2.75766	3.17482	4.35104	2.84843	3.93371	3.93398	2.63268	3.67115	2.7668	5.95035	2.78018	2.46476	3.37776	3.91168	6.17251
TCGA_TCGA-KR-A7K2	3.49992	2.84328	2.51019	2.90771	2.65402	2.52349	2.87268	2.57952	3.63552	2.64745	3.01758	2.5611	4.93266	2.52684	7.17665	4.85929	3.7287	3.6251	2.46754	2.59623	3.42953	4.58264	3.00494	4.46923	4.16845	3.52117	3.57986	2.70657	3.94038	2.71976	2.57453	4.20383	3.65755	4.52414
TCGA_TCGA-KR-A7K7	2.96116	4.2537	3.13274	3.20997	2.79297	2.48927	3.54135	3.32323	3.62016	2.72402	3.68304	4.41114	5.37352	2.75054	7.07105	5.73512	4.65312	4.02838	2.4953	3.41135	5.15138	5.11259	3.31128	5.06979	4.52673	3.03697	3.52197	2.91131	4.90986	2.38107	2.46476	3.12813	2.93504	4.44898
TCGA_TCGA-KR-A7K8	3.24232	4.60783	3.27588	3.98583	2.99816	3.20677	3.53218	2.92486	3.07264	2.72044	4.48938	4.70976	6.18142	2.88706	5.75595	5.27306	5.0003	5.75073	2.46754	2.9822	5.30175	5.71618	3.49797	5.5662	4.35717	2.83214	3.88081	2.54455	4.74344	2.46612	2.46476	3.393	3.04776	5.2939
TCGA_TCGA-LG-A9QD	5.96889	2.56729	2.50864	2.77744	2.64258	2.48451	2.7976	2.49095	3.20409	2.6132	3.03489	2.65225	4.67342	2.52124	7.13803	5.27378	2.83108	4.44088	2.47979	2.66618	3.45095	3.67808	2.76358	4.13489	3.53888	2.7947	3.12283	2.63275	4.85898	2.33367	2.46476	2.76691	2.774	5.15197
TCGA_TCGA-MI-A75C	3.94112	3.29852	2.71173	2.91209	2.74055	2.42069	3.27273	2.6506	3.14547	2.63632	3.23976	3.16181	4.86639	2.53795	6.71187	5.11782	4.1968	2.84224	3.16425	2.64158	3.58906	4.5242	3.06162	4.08614	3.7904	3.12045	3.71179	2.82513	3.6497	2.4843	2.46476	3.92127	2.9523	4.96513
TCGA_TCGA-MI-A75E	3.13786	2.62134	2.59166	2.88312	2.82695	2.70543	2.86993	2.64398	3.36333	2.72646	3.71844	3.21557	4.94943	2.77547	7.62802	3.31616	4.10641	3.47854	2.48178	2.84839	4.08392	4.98166	3.1591	5.02016	4.24828	3.49898	3.41487	2.66515	5.42702	2.61338	2.46476	3.22508	3.64547	5.43318
TCGA_TCGA-MI-A75G	3.81842	2.49589	2.53236	2.69155	2.64596	2.27446	2.81079	2.47637	3.55706	2.59333	2.78912	2.42678	4.29058	2.51518	6.43869	3.57716	3.64303	6.05133	2.48114	2.48263	2.9572	3.55399	2.83467	3.18514	3.05736	2.5467	3.42564	2.49024	4.57976	2.40218	2.46476	3.12266	3.31574	4.85793
TCGA_TCGA-MI-A75H	2.5719	3.21645	2.74202	3.08299	2.81266	2.71891	3.07196	2.60985	4.01195	2.89487	3.88749	3.0314	5.07206	2.69606	5.24942	5.83289	4.37986	3.6777	2.46754	2.98506	3.68454	4.77233	2.93459	5.13115	3.48955	3.05412	3.52861	3.21192	3.94591	2.61843	2.46476	3.22478	3.75478	5.75097
TCGA_TCGA-MR-A520	3.50124	2.39335	2.48908	2.69399	2.64711	2.50499	2.75992	2.42693	3.04362	2.72486	3.0041	2.41508	5.34793	2.55393	7.80195	3.9634	2.7463	4.02303	2.46754	2.75345	3.32474	3.51165	2.66559	3.70375	2.99758	2.51435	3.04314	2.82982	3.76435	2.33367	2.55656	3.17542	2.95583	4.48862
TCGA_TCGA-MR-A8JO	4.19129	3.69348	2.82816	3.33486	3.07885	3.05643	2.94325	3.72926	3.06053	2.77407	3.61789	3.21249	5.38589	3.29229	6.87042	5.92948	5.36527	5.30992	2.47936	3.07089	4.22139	5.17675	3.21151	5.03592	4.08018	3.63023	2.75318	3.3956	5.68672	2.57066	2.46476	4.05376	5.29655	6.25399
TCGA_TCGA-NI-A4U2	2.72241	2.47573	2.52128	2.63854	2.70385	2.60433	2.71409	2.41923	3.21297	2.68833	3.07608	2.34178	4.47475	2.55976	5.86604	3.82452	3.20379	5.31361	2.49738	2.58756	2.73802	4.72798	2.78047	3.24249	3.56473	2.43003	3.08425	2.63747	3.73966	2.4331	2.46476	3.09175	3.27747	4.86648
TCGA_TCGA-NI-A8LF	5.03779	2.49666	2.50378	2.73417	2.73092	2.60277	2.80616	2.55698	3.00954	2.64596	2.8797	2.7004	4.55668	2.65283	6.56036	5.22006	4.14662	4.64618	2.47849	2.51822	3.10602	3.99859	3.08816	3.48781	3.83969	2.7038	3.95919	2.63695	3.92842	2.44168	2.46476	3.24294	3.78014	5.65805
TCGA_TCGA-O8-A75V	3.78391	2.81994	2.63056	2.94216	2.85055	2.95851	3.02968	3.36575	3.01334	2.59333	4.06339	3.09591	5.46502	2.754	6.85265	3.89075	3.99694	3.022	2.47976	2.84844	3.9849	5.53814	3.17733	4.93075	3.57733	2.86878	3.30848	2.57435	6.1743	2.43456	2.46476	3.34377	3.53384	5.13026
TCGA_TCGA-PD-A5DF	3.78978	3.6728	3.00435	3.32015	3.12631	2.69449	3.02981	2.54695	3.46907	2.64561	4.51391	2.79772	6.81061	2.85612	6.30733	3.50365	4.59562	3.1635	2.49983	2.57274	3.56462	5.54029	3.53784	4.54255	4.31572	2.64928	3.15413	2.48316	6.1475	3.08276	2.46476	3.42629	4.10179	6.00023
TCGA_TCGA-QA-A7B7	3.25916	3.12836	2.66441	3.27932	2.75774	2.77095	2.9304	2.44633	3.61613	2.61313	3.0458	2.86214	6.78441	2.65348	7.84628	5.00211	3.87683	4.26263	3.17756	2.69801	3.90938	4.30377	3.39942	3.99542	4.22243	3.18166	4.25007	3.13753	3.65785	2.50846	2.46476	4.10117	3.00764	4.18577
TCGA_TCGA-RC-A6M4	3.49367	2.4577	2.46777	2.68254	2.62688	2.28249	2.67072	2.39986	3.17302	2.59333	2.65957	2.27693	4.29826	2.47637	7.37683	4.19465	3.12291	6.29996	2.46754	2.54348	2.80679	3.5859	2.94471	2.63673	2.90482	2.39406	3.84847	2.45067	3.23175	2.45064	2.46476	2.85588	2.77845	5.64595
TCGA_TCGA-RC-A6M5	3.69225	2.77444	2.4996	2.77869	2.65391	2.74783	2.80945	3.44098	3.27268	2.69924	3.04885	2.60148	4.76283	2.71689	8.04759	4.91452	3.92036	4.84747	2.46754	2.57915	3.38729	4.40982	2.64104	3.74447	3.4653	2.77501	3.05411	2.88256	5.48034	2.51202	2.67971	3.79892	4.6399	5.94071
TCGA_TCGA-RC-A7S9	3.87926	3.17177	2.66392	3.11669	2.74695	2.56117	2.80005	2.47035	3.20191	2.59333	3.46316	3.33822	4.82539	2.68649	7.60121	5.13597	4.00016	5.00134	2.49239	2.70502	3.94296	5.17337	2.88325	4.45662	3.37674	2.73421	3.54711	2.80195	3.42614	2.35513	2.46476	6.74509	2.76527	5.07235
TCGA_TCGA-RC-A7SB	3.41608	2.66233	2.55484	2.67523	2.70204	2.65894	2.75967	2.45956	3.22374	2.59333	3.37219	2.46579	4.72759	2.55065	6.90412	4.67344	2.98338	5.97559	3.62999	2.52358	2.83703	3.87738	2.91989	3.35184	3.28142	2.5862	3.49421	2.60446	3.8801	2.54725	2.46476	3.64339	2.98364	4.43039
TCGA_TCGA-RC-A7SF	2.51367	3.40536	2.58067	3.21421	2.72291	2.42837	2.9356	2.58834	4.13315	2.59333	2.88445	2.8334	4.46813	2.53456	6.98989	4.54447	3.93914	7.58784	2.49779	2.61987	3.43358	3.61032	2.80229	3.89708	3.07757	2.61151	4.0795	2.76484	3.83963	2.43443	2.46476	3.60583	2.90812	4.98552
TCGA_TCGA-RC-A7SH	2.97479	2.85581	2.50184	2.79064	2.69378	2.2509	2.67072	2.60413	3.36646	2.62032	2.75849	4.0295	4.31917	2.5261	6.45365	4.03426	4.42296	6.76677	2.48418	2.43578	3.03323	4.76217	2.495	2.83584	3.60991	2.45038	4.86242	2.52671	3.3062	2.3622	2.46476	4.3586	3.19881	4.86706
TCGA_TCGA-UB-A7ME	2.92632	3.99786	3.1959	3.79135	3.07353	3.19353	3.45002	3.28651	3.69617	2.64238	4.14462	4.36375	5.46621	3.03561	6.63396	5.11648	4.46422	3.82036	2.46754	3.07147	5.34469	5.19568	3.51314	5.92628	5.36029	3.44569	4.14559	2.73221	4.97803	2.9224	2.46476	4.12731	4.22102	5.66082
TCGA_TCGA-UB-A7MF	3.62495	4.23696	3.42002	3.77182	3.33292	3.8114	3.62893	3.21084	3.03554	2.76388	4.53117	4.26929	5.96582	2.83251	6.41704	5.04234	4.61064	4.5427	2.46754	4.00066	5.32367	5.94426	3.40667	5.83361	3.70674	3.01818	2.94096	4.04688	4.26795	2.56304	2.54543	3.87068	3.07617	5.39191
TCGA_TCGA-UB-AA0V	3.4099	2.7206	2.84264	2.81078	2.69108	3.04122	3.02624	2.5893	3.07768	2.69481	3.97846	2.71336	4.98221	2.64965	7.28512	5.55445	2.75433	5.92962	2.57043	3.14626	3.41827	4.26378	2.78279	4.32243	3.29539	3.02555	3.42092	2.84334	4.6266	2.5661	2.46476	2.99843	3.10229	5.73823
TCGA_TCGA-WJ-A86L	5.63928	2.59456	2.59941	2.74552	2.69647	2.95766	2.75821	2.61575	3.14318	2.6377	2.76691	2.44585	4.46364	2.51584	6.5949	5.13992	3.51155	4.82593	2.72526	2.75837	3.29784	3.74636	3.35187	3.08259	5.82848	2.65702	4.40701	2.98451	3.59558	2.33367	2.46476	3.54952	2.87513	3.89004
TCGA_TCGA-WQ-A9G7	2.82812	2.62178	2.59406	2.66752	2.63473	2.1468	2.71009	3.94729	3.38018	2.59333	3.19835	6.36463	4.72107	2.5314	6.46742	3.35611	3.56106	4.97796	2.48566	2.64663	2.89746	4.40693	2.62491	3.37916	4.66622	2.40521	2.84418	2.66554	3.57183	2.36472	2.46476	3.33823	2.83274	4.11894
TCGA_TCGA-WQ-AB4B	2.82029	2.84229	2.5881	2.74011	2.68022	2.28816	2.98314	2.43519	3.05321	2.59333	3.41803	2.3949	5.16131	2.53237	6.45118	5.23719	3.21548	3.21431	2.53929	2.65044	2.9921	4.78878	2.83147	3.94351	3.82618	2.98482	3.21418	2.68982	5.34228	2.36519	2.46476	2.9054	3.5645	4.6126
TCGA_TCGA-WX-AA46	2.88511	2.49774	2.58282	2.70675	2.71895	2.9482	2.67072	2.7247	3.17105	2.59333	3.62665	2.40817	4.51923	2.56391	6.44348	5.52173	2.26869	4.02405	2.46754	2.93224	2.96125	3.85983	2.60511	3.73833	2.87586	2.44074	3.14505	2.9395	3.36374	2.72596	2.46476	2.92279	2.35821	5.31758
TCGA_TCGA-WX-AA47	3.33929	2.32295	2.69387	2.61761	2.61184	2.19647	2.74895	3.14398	2.99146	2.59333	2.34259	2.2601	4.9078	2.51039	5.36129	5.11113	3.53721	3.92204	2.46754	2.37201	2.66801	3.50589	2.4856	2.57795	2.89106	2.33494	2.73284	2.41922	3.86058	2.35475	2.46476	3.30007	2.42512	4.46711
TCGA_TCGA-XR-A8TC	3.43619	2.62829	2.48318	2.84018	2.68406	2.28671	2.67072	2.55746	3.93473	2.61705	3.14303	2.47429	4.42074	2.49239	6.65496	3.03964	3.0661	3.97049	2.49658	2.55267	2.80831	3.81334	3.3172	3.434	5.07014	2.92158	4.34725	2.60328	3.47913	2.40716	2.46476	4.49695	3.59549	5.25863
TCGA_TCGA-XR-A8TD	3.23031	4.56956	3.55696	3.77885	3.48312	3.39477	3.50609	3.17103	3.73414	2.59333	5.0247	4.69153	6.29448	2.69357	6.27294	5.47706	4.47737	3.7936	2.65852	3.30308	5.28368	5.63202	3.56278	5.5022	4.41598	3.24312	3.53174	2.81321	5.59118	2.4137	2.46476	3.57972	3.29158	5.49467
TCGA_TCGA-XR-A8TF	3.20658	3.31657	2.66201	3.10892	2.65269	2.61515	2.7062	2.74421	3.32868	2.61979	3.16521	3.23462	4.70566	2.55352	7.50396	6.41875	3.20742	6.08182	2.48385	2.76545	3.70165	3.75553	2.75126	3.88846	3.9077	2.34193	3.2165	2.6612	3.09872	2.36164	2.46476	2.9346	2.86154	4.16598
TCGA_TCGA-ZP-A9CV	3.47396	2.9924	2.53189	2.97151	2.7028	3.14981	2.85741	2.65317	3.08562	2.62337	4.05266	2.88318	5.41556	2.5963	6.99435	5.34578	3.2073	6.03761	2.55712	3.03421	3.72486	5.34178	3.42223	5.10583	3.69332	3.69989	3.82978	3.09347	4.66009	2.45515	2.46476	4.26775	3.75687	5.47012
TCGA_TCGA-ZP-A9CY	2.76719	2.37832	2.52427	2.70657	2.92386	2.91968	2.80675	2.52058	3.34713	2.59333	3.79397	2.35816	5.3375	2.69994	6.05135	3.33533	3.23631	5.75982	2.46754	3.04118	3.10041	5.1823	3.05314	4.43102	3.246	2.88579	3.32566	2.93859	5.22539	2.62982	2.46476	3.18057	3.42193	5.36223
TCGA_TCGA-ZP-A9D4	3.557	2.45319	2.51906	2.742	2.84339	2.48857	2.69988	2.42564	3.45849	2.61505	3.18138	2.64439	4.73999	2.47775	7.75777	5.86125	3.45251	6.19428	2.46754	2.84514	3.18329	3.62298	2.97793	3.33611	3.63034	2.40369	4.17598	2.65133	4.06878	2.33367	2.46476	3.12272	3.0765	5.48566
TCGA_TCGA-ZS-A9CD	4.20628	2.78194	2.48726	2.95351	2.81578	2.43369	2.70863	2.58533	3.87712	2.62162	3.51878	2.6755	5.05445	2.81123	6.3136	3.83896	4.5335	3.56537	2.50214	2.63702	3.02645	4.37909	2.99244	4.15916	3.97029	3.04865	3.25579	2.63671	5.55267	2.39262	2.46476	3.07176	3.73825	5.15205
TCGA_TCGA-ZS-A9CE	3.64392	2.32295	2.50968	2.61761	2.63982	3.1339	2.67072	2.39986	3.35134	2.61141	2.4837	2.33718	4.0312	2.50627	6.02682	3.8507	2.48177	5.14357	2.46754	3.27848	2.8118	4.63907	3.05063	2.51856	3.61404	2.33296	4.46587	2.57468	4.87403	2.42598	2.46476	3.4756	2.51252	4.37862
TCGA_TCGA-ZS-A9CF	2.84886	3.31786	2.62035	3.13052	3.02779	2.55869	2.71105	2.62538	3.10675	2.62344	3.53519	2.64477	4.91474	2.74028	6.79295	3.45594	4.35864	9.23373	2.48611	2.84047	3.79457	3.82411	4.04217	4.2036	3.60624	3.27837	4.35868	3.30554	4.21509	2.4263	2.46476	4.25054	3.84618	5.37152
TCGA_TCGA-ZS-A9CG	3.4325	2.56738	3.1204	2.72415	2.72757	2.73367	2.70531	2.8787	3.61769	2.59333	3.18687	2.52818	4.79201	2.57855	6.87159	4.55216	4.01267	4.84772	2.48344	2.58405	3.08537	3.7323	3.09734	3.8037	3.35055	2.77247	3.70207	2.58063	6.0109	2.73926	2.46476	3.40233	3.14505	6.02165
