# Supplementary material for: Identification and characterization of a novel molecular classification based on disulfidptosis-related genes to predict prognosis and immunotherapy efficacy in hepatocellular carcinoma
Source: Aging (Albany NY). 2023 Jul 3;15(13):6135–51. doi: 10.18632/aging.204809 (PMC10373967; doi:10.18632/aging.204809)
Supplement: Supplementary Table 5 [file aging-15-204809-s006.xlsx]

## Sheet: Sheet1
Supplementary Table 5. The TME scores between 2 clusters.
ID	StromalScore	ImmuneScore	ESTIMATEScore	TumorPurity
GSE14520_GSM362958	-796.954	-162.336	-563.256	0.86667
GSE14520_GSM362959	-29.1648	-1.70992	1188.19	0.711336
GSE14520_GSM362960	-448.967	-532.453	-111.349	0.831695
GSE14520_GSM362964	-179.321	-26.6433	907.693	0.739664
GSE14520_GSM362965	312.851	-175.449	1485.21	0.680026
GSE14520_GSM362970	-263.314	-60.719	309.495	0.795831
GSE14520_GSM362982	-625.294	-67.9157	-400.894	0.854535
GSE14520_GSM362983	-1598.36	-553.078	-2151.43	0.958478
GSE14520_GSM362987	-788.309	547.367	-240.941	0.842106
GSE14520_GSM362988	-890.353	-37.4829	-927.836	0.892115
GSE14520_GSM362992	-1116.37	16.8555	-1099.51	0.903216
GSE14520_GSM363010	-428.44	972.802	544.362	0.774487
GSE14520_GSM363013	113.011	1749.21	1862.23	0.638429
GSE14520_GSM363017	577.95	1330.84	1908.79	0.633154
GSE14520_GSM363032	-613.492	1484.68	871.189	0.743259
GSE14520_GSM363033	-690.756	1554.9	864.142	0.743951
GSE14520_GSM363037	-978.889	424.993	-553.896	0.865984
GSE14520_GSM363048	-1025.46	-29.0271	-1054.49	0.90036
GSE14520_GSM363051	-163.433	1156.51	993.081	0.731171
GSE14520_GSM363052	-555.873	1336.81	780.942	0.752056
GSE14520_GSM363054	670.886	1208.33	1879.21	0.636508
GSE14520_GSM363057	-1141.95	-274.882	-1416.83	0.92222
GSE14520_GSM363070	-1509.53	437.45	-1072.08	0.90148
GSE14520_GSM363071	-846.409	353.819	-492.59	0.861449
GSE14520_GSM363073	-757.628	372.377	-385.252	0.853341
GSE14520_GSM363075	-156.092	749.282	593.189	0.769933
GSE14520_GSM363076	-383.397	439.111	55.714	0.817831
GSE14520_GSM363078	-403.326	1066.79	663.464	0.763309
GSE14520_GSM363079	-609.248	-379.094	-988.342	0.896092
GSE14520_GSM363080	-204.74	1327.41	1122.67	0.718062
GSE14520_GSM363081	-487.062	955.105	468.043	0.781525
GSE14520_GSM363083	-256.025	779.391	523.366	0.776433
GSE14520_GSM363084	-525.316	421.833	-103.482	0.831053
GSE14520_GSM363085	-994.941	449.869	-545.071	0.865335
GSE14520_GSM363086	-959.635	-278.074	-1237.71	0.911736
GSE14520_GSM363087	-261.474	350.155	88.6809	0.815036
GSE14520_GSM363100	-811.981	-375.545	-1187.53	0.908685
GSE14520_GSM363102	-1010.55	56.2579	-954.296	0.893863
GSE14520_GSM363105	-540.756	174.735	-366.021	0.851866
GSE14520_GSM363106	-1010.81	425.355	-585.452	0.868291
GSE14520_GSM363107	-496.84	392.515	-104.325	0.831122
GSE14520_GSM363109	-920.992	638.318	-282.674	0.845394
GSE14520_GSM363122	-418.52	48.6367	-369.883	0.852162
GSE14520_GSM363123	-1250.77	-66.1867	-1316.96	0.916453
GSE14520_GSM363126	-697.005	751.933	54.9286	0.817897
GSE14520_GSM363127	-1134.7	374.128	-760.575	0.880754
GSE14520_GSM363129	-1070.65	-464.57	-1535.22	0.9288
GSE14520_GSM363142	-821.537	-171.975	-993.512	0.896429
GSE14520_GSM363147	-1014.58	-271.632	-1286.21	0.914637
GSE14520_GSM363150	-1263.18	103.731	-1159.45	0.906957
GSE14520_GSM363151	-1361.41	-403.924	-1765.34	0.940786
GSE14520_GSM363152	-1000.52	-259.105	-1259.62	0.913052
GSE14520_GSM363169	-1107.42	503.21	-604.21	0.869654
GSE14520_GSM363170	-207.844	807.477	599.633	0.769329
GSE14520_GSM363178	-672.55	-60.4149	-732.965	0.878828
GSE14520_GSM363184	-489.924	1450.48	960.559	0.734419
GSE14520_GSM363190	-136.188	706.812	570.624	0.772042
GSE14520_GSM363192	-1438.48	-240.56	-1679.05	0.936416
GSE14520_GSM363194	-1040.69	692.875	-347.815	0.850463
GSE14520_GSM363207	-426.149	1019.87	593.723	0.769883
GSE14520_GSM363211	-878.61	-90.2683	-968.879	0.894821
GSE14520_GSM363217	-1499.26	-991.095	-2490.35	0.971473
GSE14520_GSM363218	-911.52	670.698	-240.822	0.842097
GSE14520_GSM363222	-1202.28	-196.374	-1398.66	0.921185
GSE14520_GSM363226	-580.799	347.134	-233.665	0.84153
GSE14520_GSM363232	-838.599	1527.2	688.597	0.760921
GSE14520_GSM363235	-164.747	1838.06	1673.31	0.659524
GSE14520_GSM363237	-293.611	2384.24	2090.63	0.61227
GSE14520_GSM363245	-332.875	1535.89	1203.02	0.709804
GSE14520_GSM363247	-858.449	45.0581	-813.391	0.884399
GSE14520_GSM363249	-1486.78	-166.307	-1653.08	0.935072
GSE14520_GSM363263	-463.915	695.261	231.346	0.802725
GSE14520_GSM363267	-142.578	1718.39	1575.81	0.670215
GSE14520_GSM363268	-851.243	1324.01	472.763	0.781092
GSE14520_GSM363271	857.714	2531.26	3388.98	0.451412
GSE14520_GSM363274	-1481.45	-195.45	-1676.9	0.936306
GSE14520_GSM363289	-697.49	4.05881	-693.431	0.876044
GSE14520_GSM363290	-638.539	592.018	-46.5204	0.826374
GSE14520_GSM363292	-1017.17	114.499	-902.676	0.89044
GSE14520_GSM363296	-863.85	-232.522	-1096.37	0.903018
GSE14520_GSM363297	-384.771	1811.11	1426.34	0.686336
GSE14520_GSM363310	-198.007	622.572	424.565	0.78549
GSE14520_GSM363313	-952.052	66.317	-885.735	0.889306
GSE14520_GSM363317	-813.86	829.741	15.8812	0.821181
GSE14520_GSM363328	-1059.91	399.7	-660.21	0.873682
GSE14520_GSM363329	-667.1	348.814	-318.286	0.848175
GSE14520_GSM363330	-647.318	34.244	-613.074	0.870295
GSE14520_GSM363331	-884.684	1808.14	923.46	0.738104
GSE14520_GSM363339	-363.062	651.795	288.733	0.797673
GSE14520_GSM363341	-992.437	527.332	-465.104	0.859393
GSE14520_GSM363346	-947.598	11.9405	-935.658	0.892633
GSE14520_GSM363348	-743.057	-14.2606	-757.317	0.880528
GSE14520_GSM363350	-732.372	432.552	-299.819	0.846736
GSE14520_GSM363354	-1375.18	-75.9236	-1451.1	0.924154
GSE14520_GSM363355	-711.71	260.223	-451.487	0.858369
GSE14520_GSM363357	-1339.21	-582.372	-1921.58	0.948313
GSE14520_GSM363358	-866.564	511.404	-355.16	0.851029
GSE14520_GSM363368	-740.791	498.948	-241.843	0.842177
GSE14520_GSM363376	573.693	1445.47	2019.16	0.620531
GSE14520_GSM363384	-444.511	1326.9	882.393	0.742158
GSE14520_GSM363400	-1093.46	147.431	-946.03	0.893318
GSE14520_GSM712542	-903.17	-181.173	-1084.34	0.902258
GSE36376_GSM890322	-248.938	1003.5	754.562	0.754603
GSE36376_GSM890323	39.9974	1380.14	1420.13	0.686998
GSE36376_GSM890324	-630.46	743.993	113.533	0.812917
GSE36376_GSM890325	-547.974	547.548	-0.425827	0.822545
GSE36376_GSM890326	-1382.67	-562.23	-1944.9	0.949393
GSE36376_GSM890328	-217.396	1110.8	893.406	0.741073
GSE36376_GSM890330	-1014.99	80.2751	-934.711	0.89257
GSE36376_GSM890338	-426.866	2428.25	2001.39	0.622575
GSE36376_GSM890339	98.4012	1656.59	1754.99	0.650465
GSE36376_GSM890344	-152.632	697.23	544.598	0.774465
GSE36376_GSM890346	-704.142	679.961	-24.1801	0.824523
GSE36376_GSM890347	-497.185	316.171	-181.013	0.837329
GSE36376_GSM890349	-634.866	885.218	250.352	0.801058
GSE36376_GSM890350	-745.416	209.308	-536.108	0.864675
GSE36376_GSM890352	-691.497	488.569	-202.928	0.839084
GSE36376_GSM890353	-633.303	274.753	-358.55	0.851291
GSE36376_GSM890355	-212.87	927.464	714.594	0.758439
GSE36376_GSM890356	-603.059	246.551	-356.508	0.851133
GSE36376_GSM890358	-364.711	1509.22	1144.51	0.715827
GSE36376_GSM890361	-428.424	189.397	-239.027	0.841955
GSE36376_GSM890362	-679.867	278.666	-401.201	0.854559
GSE36376_GSM890363	-787.317	955.225	167.908	0.808243
GSE36376_GSM890364	-181.798	1047.94	866.147	0.743754
GSE36376_GSM890367	-640.096	628.848	-11.2484	0.823447
GSE36376_GSM890371	-1187.75	-131.508	-1319.26	0.916588
GSE36376_GSM890375	-620.683	1077.81	457.124	0.782524
GSE36376_GSM890382	-662.081	210.404	-451.677	0.858383
GSE36376_GSM890383	-580.526	525.227	-55.2993	0.827099
GSE36376_GSM890384	-888.698	-254.936	-1143.63	0.905977
GSE36376_GSM890389	-662.838	117.686	-545.152	0.865341
GSE36376_GSM890396	484.961	1207.23	1692.19	0.657439
GSE36376_GSM890398	-213.192	863.824	650.632	0.764525
GSE36376_GSM890401	-900.446	226.999	-673.447	0.874626
GSE36376_GSM890405	-277.86	1576.52	1298.66	0.699846
GSE36376_GSM890406	-1072.34	344.006	-728.333	0.878503
GSE36376_GSM890411	-759.039	334.245	-424.794	0.856352
GSE36376_GSM890412	-827.666	802.043	-25.6224	0.824643
GSE36376_GSM890416	-221.776	703.83	482.054	0.78024
GSE36376_GSM890417	-546.408	507.394	-39.0141	0.825753
GSE36376_GSM890420	4.62218	998.802	1003.42	0.730134
GSE36376_GSM890421	-300.745	809.592	508.846	0.777774
GSE36376_GSM890422	-1094.49	50.0848	-1044.41	0.899715
GSE36376_GSM890424	-932.041	230.477	-701.564	0.876619
GSE36376_GSM890428	-687.86	753.782	65.9219	0.816967
GSE36376_GSM890429	-589.873	1348.01	758.134	0.754258
GSE36376_GSM890430	-918.625	110.89	-807.735	0.884012
GSE36376_GSM890432	100.062	1554.61	1654.67	0.661579
GSE36376_GSM890433	-338.545	752.18	413.635	0.786482
GSE36376_GSM890435	-1115.65	378.125	-737.523	0.879147
GSE36376_GSM890436	-144.781	707.792	563.011	0.772752
GSE36376_GSM890440	-100.861	1208.94	1108.07	0.719552
GSE36376_GSM890441	-271.52	1494.83	1223.31	0.707703
GSE36376_GSM890442	-176.593	674.679	498.086	0.778766
GSE36376_GSM890444	-279.134	1636.37	1357.24	0.693678
GSE36376_GSM890445	-300.2	523.195	222.995	0.803455
GSE36376_GSM890446	-202.992	976.896	773.903	0.752737
GSE36376_GSM890447	-985.767	727.017	-258.75	0.843513
GSE36376_GSM890449	-903.188	277.15	-626.038	0.871231
GSE36376_GSM890451	-958.191	405.62	-552.571	0.865887
GSE36376_GSM890452	310.361	1707.17	2017.53	0.620718
GSE36376_GSM890454	-1422.96	-511.317	-1934.28	0.948902
GSE36376_GSM890456	-244.03	232.387	-11.6436	0.82348
GSE36376_GSM890457	573.627	1302.5	1876.13	0.636857
GSE36376_GSM890462	-177.884	1001.01	823.122	0.747961
GSE36376_GSM890463	145.561	1401.64	1547.2	0.673326
GSE36376_GSM890465	-1143.87	-305.274	-1449.14	0.924044
GSE36376_GSM890466	-889.235	336.667	-552.568	0.865886
GSE36376_GSM890467	-179.648	1014.76	835.116	0.746791
GSE36376_GSM890468	12.5399	1455.63	1468.17	0.681858
GSE36376_GSM890472	-1579	-375.205	-1954.2	0.949821
GSE36376_GSM890477	448.279	1923.32	2371.6	0.57915
GSE36376_GSM890486	889.755	974.78	1864.53	0.638169
GSE36376_GSM890489	-423.873	-72.8383	-496.711	0.861756
GSE36376_GSM890490	-1062.9	899.187	-163.715	0.835938
GSE36376_GSM890491	-1022.26	187.156	-835.102	0.885882
GSE36376_GSM890494	-567.781	509.675	-58.1058	0.82733
GSE36376_GSM890496	1073.13	1656.63	2729.75	0.535511
GSE36376_GSM890498	-639.783	-101.369	-741.152	0.879401
GSE36376_GSM890499	-923.188	126.15	-797.038	0.883276
GSE36376_GSM890502	-928.298	538.886	-389.412	0.853659
GSE36376_GSM890504	-761.426	109.565	-651.861	0.873085
GSE36376_GSM890507	-710.063	119.832	-590.23	0.868639
GSE36376_GSM890516	-562.785	382.955	-179.83	0.837234
GSE36376_GSM890517	32.6337	1298.49	1331.13	0.696433
GSE36376_GSM890518	-922.543	772.791	-149.752	0.834812
GSE36376_GSM890520	216.358	436.045	652.403	0.764357
GSE36376_GSM890521	-416.148	324.016	-92.1315	0.830126
GSE36376_GSM890522	-750.083	349.774	-400.309	0.854491
GSE36376_GSM890524	-1091.13	960.115	-131.013	0.833294
GSE36376_GSM890525	-852.143	134.483	-717.66	0.877754
GSE36376_GSM890527	-97.9648	1303.9	1205.93	0.709503
GSE36376_GSM890528	-957.223	-41.8645	-999.087	0.896791
GSE36376_GSM890529	-808.587	905.454	96.8667	0.814339
GSE36376_GSM890530	-879.183	-11.5692	-890.752	0.889642
GSE36376_GSM890532	-941.107	30.9225	-910.184	0.890941
GSE36376_GSM890533	-132.018	554.399	422.381	0.785689
GSE36376_GSM890535	10.4893	219.383	229.873	0.802854
GSE36376_GSM890536	-1017.13	-340.022	-1357.16	0.918798
GSE36376_GSM890541	-145.348	45.2259	-100.122	0.830779
GSE36376_GSM890542	-493.15	612.535	119.386	0.812417
GSE36376_GSM890543	489.722	1353.3	1843.02	0.640597
GSE36376_GSM890544	-962.904	-112.462	-1075.37	0.901689
GSE36376_GSM890546	-864.845	1157.7	292.86	0.797307
GSE36376_GSM890549	-580.768	1900.47	1319.71	0.697635
GSE36376_GSM890550	-777.243	1118.39	341.146	0.793009
GSE36376_GSM890551	-28.6327	993.266	964.633	0.734013
GSE36376_GSM890552	-881.419	-366.876	-1248.3	0.912373
GSE36376_GSM890553	-815.099	582.755	-232.344	0.841425
GSE36376_GSM890556	-830.143	210.988	-619.155	0.870734
GSE36376_GSM890557	-918.67	369.75	-548.921	0.865619
GSE36376_GSM890558	-995.169	401.362	-593.808	0.868899
GSE36376_GSM890560	-504.406	497.814	-6.59189	0.823059
GSE76427_GSM2011285	-1534.58	-613.521	-2148.1	0.958338
GSE76427_GSM2011286	-526.071	688.104	162.033	0.808751
GSE76427_GSM2011288	-463.945	1403.31	939.362	0.736527
GSE76427_GSM2011289	-524.897	492.495	-32.4023	0.825205
GSE76427_GSM2011293	-1085.5	-675.074	-1760.57	0.940548
GSE76427_GSM2011294	-974.099	-68.1549	-1042.25	0.899577
GSE76427_GSM2011296	-1565.32	-619.726	-2185.04	0.959873
GSE76427_GSM2011312	-421.875	353.212	-68.6634	0.8282
GSE76427_GSM2011313	-252.541	2609.6	2357.06	0.580889
GSE76427_GSM2011315	-849.829	480.581	-369.248	0.852113
GSE76427_GSM2011316	-607.31	228.329	-378.98	0.85286
GSE76427_GSM2011318	-551.629	1020.46	468.835	0.781452
GSE76427_GSM2011321	-129.542	1387.8	1258.26	0.704069
GSE76427_GSM2011322	-1144.3	60.9892	-1083.31	0.902193
GSE76427_GSM2011324	-329.533	852.246	522.713	0.776493
GSE76427_GSM2011325	4.5023	1262.61	1267.11	0.703145
GSE76427_GSM2011326	52.3948	702.419	754.813	0.754578
GSE76427_GSM2011330	-604.186	1158.78	554.591	0.773536
GSE76427_GSM2011331	186.995	1449.43	1636.42	0.663585
GSE76427_GSM2011334	-822.647	-80.2826	-902.93	0.890457
GSE76427_GSM2011335	-452.459	807.875	355.416	0.791731
GSE76427_GSM2011340	-512.298	457.032	-55.2659	0.827096
GSE76427_GSM2011342	-530.066	698.288	168.222	0.808216
GSE76427_GSM2011343	-557.088	671.038	113.951	0.812881
GSE76427_GSM2011344	-816.053	371.026	-445.027	0.857882
GSE76427_GSM2011345	27.4872	856.075	883.562	0.742043
GSE76427_GSM2011346	-772.807	-42.8446	-815.652	0.884554
GSE76427_GSM2011347	-603.951	-244.136	-848.088	0.886765
GSE76427_GSM2011349	-651.774	1042.8	391.023	0.788528
GSE76427_GSM2011351	-450.151	1264.95	814.802	0.748771
GSE76427_GSM2011353	-477.891	885.882	407.991	0.786994
GSE76427_GSM2011354	-977.644	-69.4142	-1047.06	0.899885
GSE76427_GSM2011355	-374.866	1155.82	780.952	0.752055
GSE76427_GSM2011362	-77.1365	382.447	305.31	0.796203
GSE76427_GSM2011363	-1111.69	416.304	-695.387	0.876183
GSE76427_GSM2011364	-957.35	321.257	-636.093	0.871954
GSE76427_GSM2011366	-849.01	325.726	-523.284	0.863728
GSE76427_GSM2011369	-993.455	-255.124	-1248.58	0.91239
GSE76427_GSM2011370	-1009.57	108.912	-900.657	0.890305
GSE76427_GSM2011372	-1216.74	-248.857	-1465.6	0.924965
GSE76427_GSM2011373	-1224.14	149.022	-1075.12	0.901673
GSE76427_GSM2011377	-1500.82	-560.113	-2060.93	0.954605
GSE76427_GSM2011378	-357.837	709.803	351.966	0.792041
GSE76427_GSM2011380	-791.095	603.083	-188.012	0.837891
GSE76427_GSM2011382	-596.085	210.857	-385.228	0.853339
GSE76427_GSM2011383	348.669	1293.25	1641.92	0.662982
GSE76427_GSM2011385	-784.749	212.739	-572.01	0.867311
GSE76427_GSM2011391	-104.354	668.761	564.407	0.772622
GSE76427_GSM2011393	-920.407	607.945	-312.462	0.847721
GSE76427_GSM2011398	535.384	3030.64	3566.02	0.428072
ICGC_DO23508	-1181.99	384.421	-797.57	0.883313
ICGC_DO23509	-1553.35	-744.4	-2297.75	0.964381
ICGC_DO23510	-17.2281	772.909	755.681	0.754495
ICGC_DO23511	-1601.91	-133.038	-1734.95	0.939264
ICGC_DO23513	-1596.27	-483.122	-2079.39	0.955408
ICGC_DO23514	-239.002	2122.53	1883.53	0.636019
ICGC_DO23519	-456.822	1293.35	836.526	0.746653
ICGC_DO23521	-1391.61	-143.329	-1534.94	0.928785
ICGC_DO23523	774.162	2928.65	3702.81	0.409841
ICGC_DO23524	-254.563	860.16	605.597	0.768769
ICGC_DO23529	-847.498	-645.904	-1493.4	0.926508
ICGC_DO23540	-1176.81	32.899	-1143.91	0.905994
ICGC_DO23542	-917.936	891.733	-26.2032	0.824691
ICGC_DO45091	-810.996	427.856	-383.14	0.853179
ICGC_DO45092	-486.731	504.923	18.1919	0.820988
ICGC_DO45093	-1398.67	659.419	-739.255	0.879268
ICGC_DO45096	-735.162	-141.828	-876.99	0.888718
ICGC_DO45111	-469.071	-23.1051	-492.176	0.861418
ICGC_DO45113	-958.642	102.148	-856.494	0.887335
ICGC_DO45117	-880.267	828.295	-51.9717	0.826824
ICGC_DO45119	-144.335	453.129	308.794	0.795893
ICGC_DO45121	-482.838	558.042	75.2045	0.816181
ICGC_DO45123	-852.321	-109.51	-961.831	0.894358
ICGC_DO45127	-638.136	976.865	338.729	0.793225
ICGC_DO45131	-855.104	709.359	-145.745	0.834488
ICGC_DO45135	970.024	1850.86	2820.88	0.524167
ICGC_DO45137	-94.2699	77.059	-17.2109	0.823944
ICGC_DO45139	-106.965	583.237	476.272	0.78077
ICGC_DO45143	-255.293	799.295	544.002	0.77452
ICGC_DO45145	-1267.95	1235.12	-32.8309	0.825241
ICGC_DO45155	1130.79	845.026	1975.81	0.625508
ICGC_DO45157	466.263	1673	2139.26	0.60661
ICGC_DO45161	-564.418	775.255	210.837	0.804516
ICGC_DO45165	379.373	894.038	1273.41	0.702488
ICGC_DO45169	-1349.25	-151.85	-1501.09	0.926932
ICGC_DO45171	-745.495	119.52	-625.975	0.871226
ICGC_DO45173	-1194.25	160.319	-1033.93	0.899042
ICGC_DO45177	733.138	930.706	1663.84	0.660569
ICGC_DO45187	-634.691	-180.291	-814.981	0.884508
ICGC_DO45189	-625.553	-796.987	-1422.54	0.922544
ICGC_DO45191	-976.609	-275.279	-1251.89	0.912589
ICGC_DO45193	-1425.98	-312.098	-1738.07	0.939421
ICGC_DO45197	-256.356	112.425	-143.93	0.834341
ICGC_DO45203	31.4277	966.266	997.694	0.730709
ICGC_DO45205	-746.443	-88.9967	-835.439	0.885905
ICGC_DO45211	-653.711	1008.36	354.646	0.7918
ICGC_DO45213	-405.439	36.4255	-369.013	0.852095
ICGC_DO45219	-820.135	-185.989	-1006.12	0.897248
ICGC_DO45221	-605.127	705.644	100.517	0.814028
ICGC_DO45223	635.479	1159.43	1794.91	0.646003
ICGC_DO45225	162.746	1532.87	1695.62	0.65706
ICGC_DO45227	-882.105	-269.18	-1151.29	0.906452
ICGC_DO45231	180.799	1199.55	1380.35	0.69123
ICGC_DO45235	-281.65	814.955	533.306	0.775512
ICGC_DO45237	-1110.78	501.767	-609.009	0.870001
ICGC_DO45239	-1189.01	484.741	-704.266	0.87681
ICGC_DO45245	-1515.34	-525.849	-2041.19	0.953737
ICGC_DO45247	-434.614	22.9774	-411.636	0.855353
ICGC_DO45253	-621.944	70.7112	-551.232	0.865788
ICGC_DO45263	-159.781	692.977	533.197	0.775522
ICGC_DO45265	-841.095	1092.88	251.789	0.800932
ICGC_DO45267	-1064.82	24.9702	-1039.85	0.899422
ICGC_DO45269	-1321.63	186.152	-1135.48	0.905469
ICGC_DO45275	-413.786	1263.12	849.332	0.745402
ICGC_DO45277	2.1994	2660.11	2662.31	0.543845
ICGC_DO45279	-47.4611	749.77	702.308	0.759613
ICGC_DO45283	-2.6329	861.647	859.014	0.744453
ICGC_DO45287	501.317	3040.11	3541.42	0.431333
ICGC_DO45299	-1329.15	-275.433	-1604.58	0.932525
ICGC_DO45301	-636.318	527.923	-108.395	0.831454
ICGC_DO45303	-225.163	669.282	444.118	0.783711
ICGC_DO45305	-808.331	302.273	-506.058	0.862451
ICGC_DO48672	-119.658	703.85	584.192	0.770775
ICGC_DO48679	-126.158	1092.68	966.52	0.733825
ICGC_DO48681	-1443.88	-997.662	-2441.54	0.969749
ICGC_DO48682	-1314.76	-606.245	-1921.01	0.948286
ICGC_DO48700	685.243	1553.79	2239.04	0.594903
ICGC_DO48712	56.2407	729.29	785.53	0.751612
ICGC_DO48717	-494.827	441.937	-52.8901	0.8269
ICGC_DO48719	-758.734	180.194	-578.54	0.867787
ICGC_DO48720	1161.14	2231.76	3392.89	0.450899
ICGC_DO48723	-1335.58	247.956	-1087.63	0.902466
ICGC_DO48727	-1141.56	-690.632	-1832.19	0.944067
ICGC_DO48728	476.262	2336.5	2812.76	0.525181
ICGC_DO48730	-517.748	1222.96	705.209	0.759336
ICGC_DO48732	-751.333	1084.37	333.041	0.793733
ICGC_DO48743	86.4751	1076.03	1162.51	0.71398
ICGC_DO48751	-1618.07	-1182.65	-2800.72	0.981265
ICGC_DO48757	-1431.79	-806.387	-2238.17	0.962031
ICGC_DO50774	177.356	1027.32	1204.68	0.709632
ICGC_DO50778	726.461	2234.26	2960.72	0.506577
ICGC_DO50785	-1394.5	93.2718	-1301.23	0.915527
ICGC_DO50793	-1138.45	-193.072	-1331.52	0.917306
ICGC_DO50799	-1394.62	918.257	-476.366	0.860237
ICGC_DO50804	-909.615	-305.964	-1215.58	0.910397
ICGC_DO50808	-358.262	642.992	284.729	0.798027
ICGC_DO50809	-83.8047	570.894	487.089	0.779777
ICGC_DO50815	-1190.73	693.511	-497.221	0.861794
ICGC_DO50822	-624.914	829.659	204.745	0.805047
ICGC_DO50825	-914.446	-184.548	-1098.99	0.903183
ICGC_DO50829	-39.3821	1820.12	1780.74	0.64759
ICGC_DO50844	-1706.77	-832.499	-2539.27	0.973151
ICGC_DO50850	-98.2661	897.791	799.525	0.750255
ICGC_DO50859	-1364.5	-805.097	-2169.59	0.959234
TCGA_TCGA-2Y-A9GS	-419.777	738.032	318.255	0.795052
TCGA_TCGA-2Y-A9GX	807.113	1830.83	2637.95	0.546843
TCGA_TCGA-2Y-A9GY	-861.137	1860.59	999.451	0.730532
TCGA_TCGA-2Y-A9H0	-993.447	908.345	-85.1011	0.82955
TCGA_TCGA-2Y-A9H2	-895.435	704.615	-190.82	0.838115
TCGA_TCGA-2Y-A9H5	-238.735	373.895	135.16	0.811064
TCGA_TCGA-2Y-A9HA	-951.03	34.9236	-916.106	0.891336
TCGA_TCGA-5C-A9VG	-368.508	-194.167	-562.676	0.866628
TCGA_TCGA-5C-A9VH	-252.124	130.982	-121.142	0.832492
TCGA_TCGA-5R-AA1C	-713.079	425.832	-287.247	0.845752
TCGA_TCGA-BC-4072	-234.23	1531.43	1297.2	0.699998
TCGA_TCGA-BC-4073	108.196	2016.95	2125.15	0.608256
TCGA_TCGA-BC-A10Q	-610.884	333.359	-277.525	0.84499
TCGA_TCGA-BC-A10R	-42.0248	63.3506	21.3258	0.820725
TCGA_TCGA-BC-A10T	189.675	297.14	486.815	0.779803
TCGA_TCGA-BC-A10U	-1205.89	139.552	-1066.34	0.901116
TCGA_TCGA-BC-A10W	-489.981	598.881	108.9	0.813313
TCGA_TCGA-BC-A10Z	-1458.82	-683.288	-2142.11	0.958086
TCGA_TCGA-BC-A112	-210.616	543.156	332.54	0.793778
TCGA_TCGA-BC-A3KG	-1200.81	47.6856	-1153.12	0.906565
TCGA_TCGA-BC-A8YO	-771.534	1333.65	562.118	0.772835
TCGA_TCGA-CC-5258	-459.96	757.119	297.159	0.796926
TCGA_TCGA-CC-5260	120.497	859.865	980.361	0.732443
TCGA_TCGA-CC-5261	156.74	1304.62	1461.36	0.682589
TCGA_TCGA-CC-5262	310.067	1264.57	1574.64	0.670343
TCGA_TCGA-CC-5263	-680.647	779.598	98.9512	0.814162
TCGA_TCGA-CC-5264	-900.232	216.238	-683.994	0.875375
TCGA_TCGA-CC-A1HT	283.197	2181.46	2464.66	0.567961
TCGA_TCGA-CC-A3M9	977.426	2878.25	3855.68	0.389271
TCGA_TCGA-CC-A3MA	-413.721	32.6172	-381.103	0.853023
TCGA_TCGA-CC-A3MB	-836.582	135.872	-700.71	0.876559
TCGA_TCGA-CC-A3MC	-481.659	419.089	-62.5705	0.827698
TCGA_TCGA-CC-A5UC	-165.391	512.839	347.448	0.792445
TCGA_TCGA-CC-A5UD	-1109.06	-135.142	-1244.2	0.912127
TCGA_TCGA-CC-A5UE	-1437.58	88.5805	-1349	0.918324
TCGA_TCGA-CC-A7IE	-565.215	1363.85	798.635	0.750342
TCGA_TCGA-CC-A7IJ	912.844	2027.91	2940.75	0.509102
TCGA_TCGA-CC-A7IK	-1227.73	-500.761	-1728.49	0.938938
TCGA_TCGA-CC-A8HS	-1087.85	-301.623	-1389.47	0.92066
TCGA_TCGA-CC-A8HT	-959.216	948.252	-10.9636	0.823424
TCGA_TCGA-CC-A8HU	-1124.11	-113.468	-1237.58	0.911728
TCGA_TCGA-CC-A8HV	-1184.4	-321.919	-1506.32	0.92722
TCGA_TCGA-CC-A9FS	-886.743	107.459	-779.284	0.882052
TCGA_TCGA-CC-A9FW	-1262.29	269.208	-993.085	0.896401
TCGA_TCGA-DD-A113	-618.177	616.545	-1.63156	0.822646
TCGA_TCGA-DD-A114	358.446	1951.65	2310.1	0.586486
TCGA_TCGA-DD-A115	-255.728	537.686	281.958	0.798272
TCGA_TCGA-DD-A116	-606.113	497.042	-109.071	0.831509
TCGA_TCGA-DD-A118	-296.209	120.89	-175.32	0.836872
TCGA_TCGA-DD-A11A	-1012.57	-149.323	-1161.89	0.907108
TCGA_TCGA-DD-A11C	-5.13609	549.409	544.273	0.774495
TCGA_TCGA-DD-A1EA	-790.54	814.552	24.0123	0.8205
TCGA_TCGA-DD-A1EC	-69.2999	2525.65	2456.35	0.568964
TCGA_TCGA-DD-A1EE	-965.437	-154.32	-1119.76	0.904487
TCGA_TCGA-DD-A1EF	-549.814	737.498	187.684	0.80653
TCGA_TCGA-DD-A1EG	68.4711	1490.53	1559	0.672044
TCGA_TCGA-DD-A1EH	-369.127	-18.0804	-387.207	0.85349
TCGA_TCGA-DD-A1EI	79.4356	636.149	715.585	0.758344
TCGA_TCGA-DD-A1EJ	-920.11	373.999	-546.111	0.865412
TCGA_TCGA-DD-A1EK	-267.097	903.027	635.93	0.765914
TCGA_TCGA-DD-A1EL	-1209.89	306.569	-903.318	0.890483
TCGA_TCGA-DD-A39W	-920.675	2.26763	-918.408	0.891489
TCGA_TCGA-DD-A39Y	-1165.2	80.1272	-1085.08	0.902305
TCGA_TCGA-DD-A3A1	-982.499	977.119	-5.38042	0.822958
TCGA_TCGA-DD-A3A4	-872.97	-473.305	-1346.28	0.918166
TCGA_TCGA-DD-A3A7	-1151.32	384.427	-766.891	0.881193
TCGA_TCGA-DD-A4NA	-275.775	684.426	408.652	0.786934
TCGA_TCGA-DD-A4NB	1038.33	1008.43	2046.76	0.617349
TCGA_TCGA-DD-A4ND	684.989	1327.48	2012.47	0.621301
TCGA_TCGA-DD-A4NE	-646.79	-184.884	-831.674	0.885649
TCGA_TCGA-DD-A4NF	-801.323	-394.485	-1195.81	0.909192
TCGA_TCGA-DD-A4NG	-777.557	568.258	-209.299	0.839592
TCGA_TCGA-DD-A4NH	-501.032	1024.36	523.331	0.776436
TCGA_TCGA-DD-A4NJ	-57.3094	978.615	921.306	0.738317
TCGA_TCGA-DD-A4NO	-254.688	244.441	-10.2466	0.823364
TCGA_TCGA-DD-A4NQ	-867.645	736.023	-131.622	0.833344
TCGA_TCGA-DD-A4NR	268.261	2421.01	2689.27	0.540521
TCGA_TCGA-DD-A4NS	636.663	1392.31	2028.97	0.619401
TCGA_TCGA-DD-A73C	-33.0204	320.284	287.263	0.797803
TCGA_TCGA-DD-A73E	-1168.91	-749.805	-1918.71	0.948179
TCGA_TCGA-DD-A73F	-68.7315	1905.85	1837.12	0.641262
TCGA_TCGA-DD-AA3A	-1429.17	113.609	-1315.56	0.916371
TCGA_TCGA-DD-AAC8	-828.584	508.123	-320.461	0.848344
TCGA_TCGA-DD-AACA	-979.756	-167.66	-1147.42	0.906212
TCGA_TCGA-DD-AACB	-600.532	1504.86	904.326	0.739996
TCGA_TCGA-DD-AACH	-631.833	460.789	-171.044	0.836528
TCGA_TCGA-DD-AACK	-975.672	219.34	-756.333	0.880459
TCGA_TCGA-DD-AACN	-196.325	484.321	287.996	0.797738
TCGA_TCGA-DD-AACP	-1562.88	-234.639	-1797.51	0.942376
TCGA_TCGA-DD-AACS	-1180.24	-283.895	-1464.14	0.924883
TCGA_TCGA-DD-AACU	-588.888	528.675	-60.213	0.827504
TCGA_TCGA-DD-AACX	-1196.41	263.897	-932.516	0.892425
TCGA_TCGA-DD-AACZ	-309.69	2144.79	1835.1	0.641489
TCGA_TCGA-DD-AAD0	-1379.76	-174.016	-1553.77	0.929806
TCGA_TCGA-DD-AAD1	335.917	1516.6	1852.51	0.639526
TCGA_TCGA-DD-AAD5	-943.042	900.906	-42.1365	0.826011
TCGA_TCGA-DD-AADB	-768.316	1357.97	589.655	0.770264
TCGA_TCGA-DD-AADC	-989.101	17.8981	-971.203	0.894973
TCGA_TCGA-DD-AADD	-1393.11	16.0533	-1377.05	0.919947
TCGA_TCGA-DD-AADG	-1039.68	-406.995	-1446.67	0.923905
TCGA_TCGA-DD-AADL	-1152.56	-249.759	-1402.32	0.921395
TCGA_TCGA-DD-AADP	-456.592	455.452	-1.13998	0.822605
TCGA_TCGA-DD-AADV	-329.207	276.742	-52.465	0.826865
TCGA_TCGA-DD-AADW	-425.516	-251.15	-676.667	0.874855
TCGA_TCGA-DD-AADY	-586.129	-361.35	-947.478	0.893414
TCGA_TCGA-DD-AAE9	-1361.08	50.2213	-1310.86	0.916094
TCGA_TCGA-DD-AAEE	-950.544	-163.117	-1113.66	0.904105
TCGA_TCGA-DD-AAEK	-58.0493	1630.84	1572.79	0.670544
TCGA_TCGA-DD-AAVP	-564.569	161.074	-403.495	0.854734
TCGA_TCGA-DD-AAVS	-600.518	324.786	-275.732	0.844849
TCGA_TCGA-DD-AAVV	170.111	1558.97	1729.08	0.653349
TCGA_TCGA-DD-AAVW	287.228	954.161	1241.39	0.705825
TCGA_TCGA-DD-AAVZ	-668.66	194.82	-473.84	0.860048
TCGA_TCGA-DD-AAW0	84.3402	1217.36	1301.7	0.699526
TCGA_TCGA-DD-AAW2	-758.144	-223.293	-981.437	0.895642
TCGA_TCGA-ED-A459	-750.7	631.957	-118.743	0.832297
TCGA_TCGA-ED-A5KG	639.944	3175.5	3815.44	0.394705
TCGA_TCGA-ED-A66X	404.862	1066.18	1471.04	0.681549
TCGA_TCGA-ED-A66Y	-1164.27	-802.997	-1967.27	0.950419
TCGA_TCGA-ED-A7PX	102.075	531.207	633.282	0.766164
TCGA_TCGA-ED-A7PZ	-1503.35	-532.891	-2036.24	0.953519
TCGA_TCGA-ED-A7XP	-223.561	603.143	379.582	0.78956
TCGA_TCGA-ED-A82E	-341.532	413.56	72.0276	0.81645
TCGA_TCGA-ED-A8O5	-671.513	-122.239	-793.752	0.88305
TCGA_TCGA-ED-A8O6	-867.543	124.05	-743.493	0.879564
TCGA_TCGA-ED-A97K	-261.163	695.227	434.064	0.784627
TCGA_TCGA-EP-A12J	-815.85	97.4399	-718.41	0.877806
TCGA_TCGA-EP-A3RK	-14.2902	1876.8	1862.51	0.638398
TCGA_TCGA-FV-A2QQ	-391.751	950.699	558.948	0.77313
TCGA_TCGA-FV-A2QR	-151.478	287.436	135.958	0.810996
TCGA_TCGA-FV-A3I0	-412.882	461.23	48.3478	0.818452
TCGA_TCGA-FV-A3I1	-255.296	993.443	738.148	0.756181
TCGA_TCGA-FV-A3R2	-1008.79	217.647	-791.138	0.88287
TCGA_TCGA-FV-A3R3	473.717	934.78	1408.5	0.688238
TCGA_TCGA-FV-A4ZQ	-868.092	1869.63	1001.53	0.730324
TCGA_TCGA-G3-A25S	-982.287	702.955	-279.332	0.845132
TCGA_TCGA-G3-A25T	-390.085	463.767	73.682	0.81631
TCGA_TCGA-G3-A25Y	-46.0051	724.087	678.082	0.761921
TCGA_TCGA-G3-A5SL	-586.847	0.597762	-586.249	0.868349
TCGA_TCGA-G3-A7M6	-577.334	422.008	-155.325	0.835262
TCGA_TCGA-G3-A7M9	-1279.38	-197.144	-1476.52	0.925573
TCGA_TCGA-G3-AAV1	-673.264	41.947	-631.317	0.871611
TCGA_TCGA-G3-AAV3	-213.32	1491.2	1277.88	0.702021
TCGA_TCGA-G3-AAV4	-831.769	-34.5624	-866.331	0.888
TCGA_TCGA-G3-AAV6	-1034.05	-274.018	-1308.07	0.91593
TCGA_TCGA-G3-AAV7	-532.36	945.255	412.895	0.786549
TCGA_TCGA-GJ-A3OU	991.95	2673.98	3665.93	0.414773
TCGA_TCGA-GJ-A6C0	-413.43	1183.66	770.231	0.753091
TCGA_TCGA-GJ-A9DB	-137.017	482.01	344.993	0.792665
TCGA_TCGA-K7-AAU7	-188.003	790.621	602.617	0.769049
TCGA_TCGA-LG-A6GG	-1046.71	-23.6088	-1070.32	0.901369
TCGA_TCGA-LG-A9QC	-935.728	-350.602	-1286.33	0.914644
TCGA_TCGA-MI-A75I	-1085.16	297.696	-787.466	0.882617
TCGA_TCGA-RC-A6M6	-1350.01	102.645	-1247.36	0.912317
TCGA_TCGA-RC-A7SK	-1156	-286.691	-1442.69	0.923681
TCGA_TCGA-RG-A7D4	-996.11	1651.39	655.285	0.764084
TCGA_TCGA-T1-A6J8	-449.042	234.704	-214.338	0.839994
TCGA_TCGA-UB-A7MA	-752.782	84.1982	-668.584	0.874279
TCGA_TCGA-UB-A7MB	-1212.44	-361.726	-1574.16	0.930903
TCGA_TCGA-UB-A7MC	-1274.13	-401.378	-1675.51	0.936234
TCGA_TCGA-UB-A7MD	-168.771	1027.8	859.029	0.744452
TCGA_TCGA-UB-AA0U	119.853	879.08	998.933	0.730584
TCGA_TCGA-WX-AA44	-814.227	492.306	-321.921	0.848457
TCGA_TCGA-XR-A8TE	-444.3	83.6729	-360.627	0.851451
TCGA_TCGA-XR-A8TG	-388.237	375.529	-12.7079	0.823569
TCGA_TCGA-YA-A8S7	238.466	1871.49	2109.96	0.610025
TCGA_TCGA-ZP-A9CZ	-124.139	1280.51	1156.37	0.714611
TCGA_TCGA-ZP-A9D0	-648.856	-122.465	-771.321	0.8815
TCGA_TCGA-ZP-A9D1	-114.015	784.402	670.387	0.762652
TCGA_TCGA-ZP-A9D2	-404.629	412.457	7.82798	0.821855
GSE14520_GSM362966	-941.196	135.681	-805.515	0.883859
GSE14520_GSM362971	497.043	1393.93	1890.97	0.635176
GSE14520_GSM362972	-574.125	388.679	-185.446	0.837685
GSE14520_GSM362976	116.03	1118.43	1234.46	0.706546
GSE14520_GSM362977	-1063.67	212.241	-851.431	0.886992
GSE14520_GSM362978	-578.898	370.017	-208.881	0.839559
GSE14520_GSM362984	-168.399	1440.06	1271.66	0.70267
GSE14520_GSM362986	-59.2472	2006.57	1947.32	0.628766
GSE14520_GSM362993	-618.977	-23.0371	-642.014	0.87238
GSE14520_GSM362994	-1119.25	-408.966	-1528.21	0.928418
GSE14520_GSM363008	571.177	1933.15	2504.32	0.563159
GSE14520_GSM363009	-144.933	956.599	811.666	0.749076
GSE14520_GSM363011	-735.793	318.804	-416.989	0.85576
GSE14520_GSM363012	-449.003	348.701	-100.302	0.830794
GSE14520_GSM363014	-565.9	335.014	-230.887	0.841309
GSE14520_GSM363015	-399.703	293.12	-106.584	0.831307
GSE14520_GSM363016	-525.289	555.762	30.4729	0.819957
GSE14520_GSM363029	886.64	2044.53	2931.16	0.510312
GSE14520_GSM363030	-1102.42	-154.342	-1256.76	0.912881
GSE14520_GSM363031	-280.768	655.63	374.861	0.789985
GSE14520_GSM363034	-711.191	242.079	-469.112	0.859694
GSE14520_GSM363035	-158.279	963.263	804.984	0.749725
GSE14520_GSM363036	-949.346	-97.7022	-1047.05	0.899884
GSE14520_GSM363038	-891.132	87.7572	-803.375	0.883712
GSE14520_GSM363039	-1018.35	-315.758	-1334.1	0.917457
GSE14520_GSM363049	-851.905	118.507	-733.398	0.878858
GSE14520_GSM363050	-683.377	16.3315	-667.046	0.87417
GSE14520_GSM363053	-363.548	228.474	-135.074	0.833624
GSE14520_GSM363055	759.416	1358.61	2118.03	0.609086
GSE14520_GSM363056	-1228.02	-142.526	-1370.54	0.919572
GSE14520_GSM363069	-209.978	373.28	163.301	0.808641
GSE14520_GSM363072	-420.643	1719.54	1298.9	0.69982
GSE14520_GSM363074	580.443	1461.11	2041.56	0.61795
GSE14520_GSM363077	-879.098	-105.971	-985.068	0.895879
GSE14520_GSM363082	-1083.41	-256.995	-1340.41	0.917824
GSE14520_GSM363098	-499.124	646.609	147.485	0.810005
GSE14520_GSM363099	361.397	1520.08	1881.47	0.636252
GSE14520_GSM363101	-586.537	466.757	-119.781	0.832382
GSE14520_GSM363104	-744.421	255.414	-489.007	0.861182
GSE14520_GSM363108	-364.666	931.262	566.596	0.772418
GSE14520_GSM363115	101.63	1537.9	1639.53	0.663244
GSE14520_GSM363121	123.453	1899.14	2022.59	0.620136
GSE14520_GSM363124	-39.9516	173.125	133.174	0.811235
GSE14520_GSM363125	-163.994	966.661	802.666	0.74995
GSE14520_GSM363128	-1168.57	124.804	-1043.76	0.899674
GSE14520_GSM363130	-1082.66	-205.889	-1288.55	0.914776
GSE14520_GSM363143	600.502	1708.8	2309.31	0.58658
GSE14520_GSM363144	-346.501	545.192	198.691	0.805574
GSE14520_GSM363145	-564.5	1494.83	930.331	0.737423
GSE14520_GSM363146	98.6142	2236.19	2334.8	0.583545
GSE14520_GSM363148	-632.544	585.186	-47.3575	0.826443
GSE14520_GSM363149	-1106.27	-120.454	-1226.73	0.911073
GSE14520_GSM363164	-793.821	-200.798	-994.619	0.896501
GSE14520_GSM363166	-1273.57	-42.1783	-1315.75	0.916382
GSE14520_GSM363168	-1261.78	-481.213	-1742.99	0.939668
GSE14520_GSM363172	-438.403	686.077	247.674	0.801293
GSE14520_GSM363174	-819.063	997.574	178.512	0.807325
GSE14520_GSM363176	201.804	1342.23	1544.03	0.673669
GSE14520_GSM363180	-310.59	1225.58	914.991	0.738942
GSE14520_GSM363182	-1466.79	-769.821	-2236.61	0.961968
GSE14520_GSM363186	206.852	804.46	1011.31	0.729342
GSE14520_GSM363188	6.63781	924.31	930.948	0.737362
GSE14520_GSM363196	-138.221	2010.16	1871.94	0.637332
GSE14520_GSM363198	-1048.02	373.577	-674.445	0.874697
GSE14520_GSM363200	30.4512	529.194	559.645	0.773066
GSE14520_GSM363202	-808.564	353.191	-455.373	0.858662
GSE14520_GSM363204	-577.32	71.9729	-505.347	0.862398
GSE14520_GSM363205	-510.182	985.71	475.528	0.780839
GSE14520_GSM363209	-313.462	1713.81	1400.34	0.689106
GSE14520_GSM363213	-895.094	-273.608	-1168.7	0.907528
GSE14520_GSM363215	-315.805	649.543	333.738	0.793671
GSE14520_GSM363220	-278.94	1245.67	966.734	0.733803
GSE14520_GSM363224	-795.424	-36.2288	-831.653	0.885647
GSE14520_GSM363230	-1416.01	-577.119	-1993.13	0.951593
GSE14520_GSM363239	-550.738	514.913	-35.8256	0.825489
GSE14520_GSM363241	-793.664	388.387	-405.277	0.854869
GSE14520_GSM363243	121.017	1642.81	1763.82	0.64948
GSE14520_GSM363251	-552.657	51.06	-501.597	0.862119
GSE14520_GSM363264	-856.878	291.026	-565.853	0.86686
GSE14520_GSM363265	68.7804	1774.95	1843.73	0.640516
GSE14520_GSM363266	-686.924	175.27	-511.653	0.862867
GSE14520_GSM363269	-1319.14	-563.686	-1882.83	0.946492
GSE14520_GSM363270	-866.23	103.971	-762.259	0.880871
GSE14520_GSM363272	-530.541	432.85	-97.691	0.83058
GSE14520_GSM363273	-299.893	607.894	308.001	0.795964
GSE14520_GSM363275	-15.2176	1423.08	1407.86	0.688306
GSE14520_GSM363288	-24.2512	655.169	630.917	0.766387
GSE14520_GSM363291	-418.112	1542.4	1124.28	0.717897
GSE14520_GSM363293	-208.009	762.308	554.3	0.773563
GSE14520_GSM363294	482.704	1021.8	1504.51	0.677946
GSE14520_GSM363295	-566.14	445.885	-120.255	0.83242
GSE14520_GSM363298	-9.79775	1822.48	1812.68	0.64401
GSE14520_GSM363309	-539.214	982.331	443.118	0.783802
GSE14520_GSM363311	-525.293	300.106	-225.187	0.840857
GSE14520_GSM363312	-649.515	36.1669	-613.348	0.870315
GSE14520_GSM363314	-5.94102	2138.46	2132.52	0.607397
GSE14520_GSM363315	-684.573	262.257	-422.316	0.856164
GSE14520_GSM363316	-1251.01	-89.2338	-1340.24	0.917815
GSE14520_GSM363326	-521.46	1704.06	1182.6	0.711912
GSE14520_GSM363327	-308.089	386.363	78.2742	0.81592
GSE14520_GSM363332	-829.564	42.7292	-786.834	0.882573
GSE14520_GSM363333	487.979	503.443	991.422	0.731337
GSE14520_GSM363335	58.9065	465.44	524.346	0.776342
GSE14520_GSM363336	-249.41	526.742	277.332	0.798681
GSE14520_GSM363337	-90.7899	756.146	665.356	0.76313
GSE14520_GSM363343	-49.4716	741.955	692.484	0.76055
GSE14520_GSM363344	-1033.46	-439.801	-1473.26	0.925391
GSE14520_GSM363352	943.44	2458.36	3401.8	0.449731
GSE14520_GSM363360	-687.356	-68.3181	-755.674	0.880413
GSE14520_GSM363362	-924.67	20.0127	-904.658	0.890573
GSE14520_GSM363364	-203.207	1382.15	1178.95	0.712289
GSE14520_GSM363366	-791.773	159.29	-632.483	0.871695
GSE14520_GSM363371	-656.464	1003.68	347.215	0.792466
GSE14520_GSM363378	-311.21	80.104	-231.107	0.841327
GSE14520_GSM363386	-255.785	703.966	448.18	0.78334
GSE14520_GSM363388	815.837	3584.01	4399.84	0.314532
GSE14520_GSM363391	-645.158	485.148	-160.009	0.83564
GSE14520_GSM363393	1453.05	1557.59	3010.64	0.500245
GSE14520_GSM363404	-637.755	-294.362	-932.117	0.892399
GSE36376_GSM890321	-976.649	81.7039	-894.946	0.889923
GSE36376_GSM890327	-155.095	598.179	443.084	0.783805
GSE36376_GSM890329	476.812	2013.25	2490.06	0.564888
GSE36376_GSM890331	-314.435	614.147	299.712	0.7967
GSE36376_GSM890332	-883.082	-260.391	-1143.47	0.905967
GSE36376_GSM890333	-299.333	649.552	350.218	0.792197
GSE36376_GSM890335	-1066.1	283.175	-782.928	0.882303
GSE36376_GSM890336	-469.813	389.689	-80.1246	0.829142
GSE36376_GSM890337	-948.744	-341.371	-1290.12	0.914869
GSE36376_GSM890340	-206.521	1036.21	829.685	0.747321
GSE36376_GSM890342	106.27	1692.12	1798.39	0.645614
GSE36376_GSM890343	359.856	1954.98	2314.84	0.585922
GSE36376_GSM890345	-610.64	281.332	-329.308	0.849031
GSE36376_GSM890348	-463.106	498.75	35.6439	0.819522
GSE36376_GSM890351	-1036.84	462.97	-573.868	0.867446
GSE36376_GSM890354	231.597	2291.27	2522.87	0.560908
GSE36376_GSM890357	-686.984	328.549	-358.436	0.851282
GSE36376_GSM890359	-874.833	-346.075	-1220.91	0.91072
GSE36376_GSM890360	-341.455	588.327	246.872	0.801363
GSE36376_GSM890365	-1146.14	-38.2957	-1184.43	0.908496
GSE36376_GSM890368	154.803	906.434	1061.24	0.724309
GSE36376_GSM890369	-1331.78	-185.013	-1516.79	0.927794
GSE36376_GSM890370	-1047.45	-5.2277	-1052.68	0.900244
GSE36376_GSM890372	-990.176	-302.765	-1292.94	0.915036
GSE36376_GSM890373	-333.785	604.351	270.566	0.799278
GSE36376_GSM890374	-1011.14	880.592	-130.546	0.833256
GSE36376_GSM890376	-649.756	1225.03	575.27	0.771609
GSE36376_GSM890377	-469.106	375.558	-93.548	0.830242
GSE36376_GSM890378	-929.515	-358.337	-1287.85	0.914735
GSE36376_GSM890379	-775.922	157.662	-618.26	0.87067
GSE36376_GSM890380	-524.41	702.74	178.33	0.807341
GSE36376_GSM890381	-930.938	285.97	-644.969	0.872592
GSE36376_GSM890385	-979.599	233.698	-1040.32	0.899453
GSE36376_GSM890386	-696.641	1569.91	873.27	0.743055
GSE36376_GSM890387	124.323	1480.57	1604.89	0.667041
GSE36376_GSM890388	-981.879	1217.36	-1049.79	0.90006
GSE36376_GSM890390	-528.759	1018.04	489.283	0.779576
GSE36376_GSM890391	450.565	2286.28	2736.85	0.534632
GSE36376_GSM890393	-518.172	744.876	226.704	0.803131
GSE36376_GSM890394	106.843	2436.02	2542.87	0.558475
GSE36376_GSM890395	67.8162	1148.72	1216.54	0.708405
GSE36376_GSM890397	-440.097	339.967	-100.129	0.83078
GSE36376_GSM890400	-565.988	1692.35	1126.36	0.717685
GSE36376_GSM890402	139.794	1107.97	1247.76	0.705162
GSE36376_GSM890403	-965.059	337.618	-1127.4	0.904965
GSE36376_GSM890407	-107.663	1677.14	1569.48	0.670905
GSE36376_GSM890408	-655.263	1087.01	-656.973	0.873451
GSE36376_GSM890409	-118.832	1307.85	1189.01	0.711251
GSE36376_GSM890410	-74.0361	598.543	524.507	0.776327
GSE36376_GSM890413	-1423.45	1172.36	-1955.91	0.949899
GSE36376_GSM890415	-1328.09	97.3067	-1230.79	0.911318
GSE36376_GSM890418	-915.033	351.74	-563.293	0.866673
GSE36376_GSM890419	-856.553	91.8533	-764.699	0.881041
GSE36376_GSM890426	-634.129	300.793	-333.336	0.849343
GSE36376_GSM890427	-13.4487	1440.45	1427	0.686266
GSE36376_GSM890431	-1004.76	572.809	-1031.41	0.89888
GSE36376_GSM890434	-1292.1	224.4	-1467.55	0.925073
GSE36376_GSM890437	-1216	971.123	-244.88	0.842418
GSE36376_GSM890438	-702.077	737.176	35.0995	0.819568
GSE36376_GSM890439	-247.5	584.831	337.331	0.79335
GSE36376_GSM890453	-499.352	1486.73	987.378	0.731741
GSE36376_GSM890455	-317.04	857.253	540.213	0.774872
GSE36376_GSM890458	-703.137	223.644	-479.493	0.860471
GSE36376_GSM890459	-441.233	360.45	-80.783	0.829196
GSE36376_GSM890460	-616.971	658.947	41.9758	0.818989
GSE36376_GSM890461	-746.794	145.996	-600.798	0.869406
GSE36376_GSM890464	-830.175	192.578	-637.598	0.872063
GSE36376_GSM890469	-70.4895	1179.64	1109.15	0.719442
GSE36376_GSM890470	-88.5131	629.212	540.699	0.774827
GSE36376_GSM890471	-34.3073	2145.51	2111.2	0.60988
GSE36376_GSM890473	-884.161	42.2431	-841.918	0.886346
GSE36376_GSM890475	-468.835	489.748	20.913	0.82076
GSE36376_GSM890476	-805.254	609.899	-195.356	0.838478
GSE36376_GSM890480	-876.747	-407.856	-1284.6	0.914542
GSE36376_GSM890481	-55.5633	364.777	309.214	0.795856
GSE36376_GSM890482	-58.6165	669.085	610.469	0.768312
GSE36376_GSM890483	-1263.76	36.3709	-1227.38	0.911112
GSE36376_GSM890484	-262.548	1519.33	1256.78	0.704223
GSE36376_GSM890485	-21.8493	1022.62	1000.78	0.7304
GSE36376_GSM890487	103.286	1102.02	1205.31	0.709567
GSE36376_GSM890488	-862.824	71.7162	-791.108	0.882868
GSE36376_GSM890492	5.16841	842.724	847.893	0.745542
GSE36376_GSM890493	-763.63	105.442	-658.188	0.873538
GSE36376_GSM890495	-458.268	580.946	122.679	0.812135
GSE36376_GSM890497	-1074.98	-220.962	-1295.94	0.915214
GSE36376_GSM890500	-1204.56	290.996	-913.566	0.891167
GSE36376_GSM890501	-838.906	781.148	-57.7583	0.827302
GSE36376_GSM890503	-480.395	1276.68	796.281	0.75057
GSE36376_GSM890505	-587.787	60.257	-527.53	0.864042
GSE36376_GSM890508	195.226	2320.01	2515.23	0.561835
GSE36376_GSM890509	-1168.36	-29.0642	-1197.42	0.909291
GSE36376_GSM890510	-396.007	888.17	492.163	0.779311
GSE36376_GSM890511	-1038.71	-169.453	-1208.16	0.909946
GSE36376_GSM890512	-1014.34	519.974	-494.369	0.861581
GSE36376_GSM890513	-844.11	411.808	-432.301	0.856921
GSE36376_GSM890514	-1102.64	-214.739	-1317.38	0.916477
GSE36376_GSM890515	-931.721	-140.521	-1072.24	0.901491
GSE36376_GSM890519	-324.41	571.825	247.415	0.801316
GSE36376_GSM890523	229.004	1013.26	1242.26	0.705735
GSE36376_GSM890526	-681.009	1227.13	546.125	0.774323
GSE36376_GSM890534	-1140.25	-591.642	-1731.89	0.93911
GSE36376_GSM890537	-769.375	874.07	104.695	0.813672
GSE36376_GSM890538	-714.574	-232.049	-946.622	0.893357
GSE36376_GSM890539	-1105.35	39.4951	-1065.86	0.901085
GSE36376_GSM890540	210.649	1731.03	1941.68	0.629409
GSE36376_GSM890545	-311.895	1230.57	918.674	0.738578
GSE36376_GSM890547	-369.933	386.059	16.1261	0.821161
GSE36376_GSM890548	-243.812	596.144	352.332	0.792008
GSE36376_GSM890554	-346.64	474.64	128.001	0.811679
GSE36376_GSM890555	-203.611	1437.92	1234.31	0.706562
GSE36376_GSM890559	-979.471	-50.0721	-1029.54	0.89876
GSE76427_GSM2011287	-138.645	295.858	157.213	0.809166
GSE76427_GSM2011290	-674.22	938.982	264.762	0.79979
GSE76427_GSM2011291	1065.31	2437.57	3502.89	0.436429
GSE76427_GSM2011292	-359.071	433.184	74.113	0.816273
GSE76427_GSM2011295	-1015.5	-319.289	-1334.79	0.917497
GSE76427_GSM2011297	-325.041	686.121	361.08	0.791223
GSE76427_GSM2011298	-992.599	1413.97	421.368	0.785781
GSE76427_GSM2011299	-615.28	466.063	-149.217	0.834769
GSE76427_GSM2011300	-939.377	-318.351	-1257.73	0.912939
GSE76427_GSM2011301	23.163	613.356	636.519	0.765859
GSE76427_GSM2011302	-877.38	905.803	28.4231	0.820129
GSE76427_GSM2011303	-690.756	-191.469	-882.225	0.88907
GSE76427_GSM2011304	-415.944	198.534	-217.409	0.840238
GSE76427_GSM2011305	698.259	1731.8	2430.06	0.572134
GSE76427_GSM2011306	-709.177	663.884	-45.2926	0.826272
GSE76427_GSM2011307	-175.828	824.973	649.145	0.764666
GSE76427_GSM2011308	-698.048	173.011	-525.038	0.863858
GSE76427_GSM2011309	-1260.88	-106.502	-1367.38	0.919389
GSE76427_GSM2011310	-819.74	298.379	-521.361	0.863586
GSE76427_GSM2011311	-293.27	1181.29	888.021	0.741604
GSE76427_GSM2011314	-527.952	1259.7	731.751	0.756795
GSE76427_GSM2011317	123.59	938.38	1061.97	0.724235
GSE76427_GSM2011319	-596.91	496.039	-100.871	0.83084
GSE76427_GSM2011320	-1112.8	891.494	-221.308	0.840548
GSE76427_GSM2011323	-846.666	-52.5022	-899.168	0.890206
GSE76427_GSM2011327	-755.421	256.507	-498.913	0.86192
GSE76427_GSM2011328	-285.148	941.862	656.714	0.763949
GSE76427_GSM2011329	-756.246	-91.2389	-847.485	0.886724
GSE76427_GSM2011332	504.694	1379.75	1884.44	0.635916
GSE76427_GSM2011333	-1026.4	539.084	-487.312	0.861055
GSE76427_GSM2011336	-375.349	941.521	566.172	0.772457
GSE76427_GSM2011337	-0.0865737	955.723	955.637	0.734909
GSE76427_GSM2011338	367.853	1289.15	1657.01	0.661322
GSE76427_GSM2011339	-667.608	413.646	-253.962	0.843135
GSE76427_GSM2011341	-429.957	-91.9825	-521.94	0.863629
GSE76427_GSM2011348	-347.227	-60.2536	-407.481	0.855037
GSE76427_GSM2011350	296.262	1499.22	1795.48	0.645939
GSE76427_GSM2011352	438.654	2909.21	3347.87	0.456788
GSE76427_GSM2011356	-1034.11	246.112	-787.996	0.882653
GSE76427_GSM2011357	-1025.96	646.123	-379.838	0.852926
GSE76427_GSM2011358	-793.963	1057.8	263.835	0.799872
GSE76427_GSM2011359	-920.676	-145.756	-1066.43	0.901121
GSE76427_GSM2011360	-136.783	2320.71	2183.92	0.601386
GSE76427_GSM2011361	-83.0064	2137.17	2054.17	0.616493
GSE76427_GSM2011365	442.846	1247.44	1690.28	0.65765
GSE76427_GSM2011367	-514.693	702.857	188.164	0.806489
GSE76427_GSM2011368	-297.358	195.975	-101.383	0.830882
GSE76427_GSM2011371	-650.676	351.527	-299.149	0.846683
GSE76427_GSM2011374	-668.304	49.8053	-618.499	0.870687
GSE76427_GSM2011375	36.8797	1512.31	1549.19	0.67311
GSE76427_GSM2011376	-13.0909	639.424	626.333	0.766819
GSE76427_GSM2011379	488.931	1655.99	2144.92	0.60595
GSE76427_GSM2011381	-825.957	703.86	-122.096	0.83257
GSE76427_GSM2011384	-638.763	173.882	-464.882	0.859376
GSE76427_GSM2011386	-82.3579	373.62	291.262	0.797449
GSE76427_GSM2011387	-1078.14	-70.4325	-1148.58	0.906284
GSE76427_GSM2011388	-797.643	209.161	-588.482	0.868512
GSE76427_GSM2011389	-1160.94	-466.306	-1627.25	0.933721
GSE76427_GSM2011390	-841.606	1631.81	790.207	0.751159
GSE76427_GSM2011392	-1030.77	661.504	-369.268	0.852115
GSE76427_GSM2011394	-896.604	-46.5714	-943.175	0.89313
GSE76427_GSM2011395	-348.661	1032.31	683.651	0.761392
GSE76427_GSM2011396	302.562	1590.38	1892.94	0.634952
GSE76427_GSM2011397	-790.259	-293.072	-1083.33	0.902194
GSE76427_GSM2011399	-490.523	210.188	-280.336	0.845211
ICGC_DO227643	-694.539	553.405	-141.134	0.834115
ICGC_DO227801	-82.7928	1229.67	1146.88	0.715585
ICGC_DO23512	-926.106	165.309	-760.797	0.88077
ICGC_DO23515	-44.4223	1008.66	964.234	0.734053
ICGC_DO23516	-1439.98	-798.02	-2238	0.962024
ICGC_DO23517	-1016.84	66.285	-950.559	0.893617
ICGC_DO23518	-344.203	880.57	536.367	0.775228
ICGC_DO23525	-748.774	1092.61	343.831	0.792769
ICGC_DO23526	-923.588	87.8495	-835.738	0.885926
ICGC_DO23527	74.4797	1145.83	1220.31	0.708014
ICGC_DO23528	-929.259	-574.59	-1503.85	0.927084
ICGC_DO23530	1508.88	2810.77	4319.66	0.325683
ICGC_DO23531	257.32	1648.96	1906.28	0.633439
ICGC_DO23532	-977.028	234.841	-742.187	0.879473
ICGC_DO23533	-1455.9	-755.653	-2211.55	0.960957
ICGC_DO23534	-1384.35	-610.905	-1995.26	0.951689
ICGC_DO23535	661.077	1510.22	2171.3	0.602866
ICGC_DO23536	-409.704	959.207	549.503	0.774009
ICGC_DO23537	-664.112	-43.6435	-707.756	0.877056
ICGC_DO23538	-390.888	123.716	-267.172	0.844176
ICGC_DO23539	-1033.18	100.023	-933.156	0.892467
ICGC_DO23541	-166.012	967.939	801.927	0.750022
ICGC_DO23543	-418.022	1871.72	1453.69	0.68341
ICGC_DO23544	-848.189	709.746	-138.442	0.833897
ICGC_DO23545	-700.707	-6.35558	-707.063	0.877007
ICGC_DO23546	-256.476	1425.86	1169.38	0.713273
ICGC_DO23547	808.659	2573.79	3382.45	0.452266
ICGC_DO23548	-653.472	1071.83	418.357	0.786054
ICGC_DO23549	-608.726	2706.62	2097.9	0.611427
ICGC_DO23550	-261.471	1440.36	1178.89	0.712295
ICGC_DO23551	427.156	1521.41	1948.57	0.628623
ICGC_DO23552	-1059.57	-473.836	-1533.41	0.928702
ICGC_DO45094	-234.838	891.608	656.77	0.763944
ICGC_DO45095	328.074	1900.52	2228.59	0.596134
ICGC_DO45097	-1228.67	-492.665	-1721.33	0.938576
ICGC_DO45099	-388.425	189.317	-199.108	0.838778
ICGC_DO45101	-848.407	403.22	-445.188	0.857894
ICGC_DO45103	819.402	954.617	1774.02	0.648341
ICGC_DO45105	-1454.16	-261.083	-1715.24	0.938267
ICGC_DO45107	-934.381	-24.7156	-959.097	0.894179
ICGC_DO45109	399.239	1222.83	1622.07	0.66516
ICGC_DO45115	-549.875	1533.54	983.67	0.732112
ICGC_DO45125	-834.868	-279.027	-1113.89	0.90412
ICGC_DO45129	-867.417	-517.923	-1385.34	0.920423
ICGC_DO45133	-1102.55	-510.248	-1612.8	0.93296
ICGC_DO45141	744.436	2671.33	3415.77	0.447899
ICGC_DO45149	-1243.09	347.38	-895.712	0.889974
ICGC_DO45153	372.025	1546.5	1918.52	0.632047
ICGC_DO45159	88.2257	1377.3	1465.52	0.682141
ICGC_DO45163	-1428.4	-368.472	-1796.87	0.942345
ICGC_DO45167	-849.655	263.168	-586.487	0.868366
ICGC_DO45175	-1139.09	-611.344	-1750.44	0.940042
ICGC_DO45179	-580.439	-87.1085	-667.547	0.874206
ICGC_DO45181	167.44	2031.68	2199.12	0.599603
ICGC_DO45183	-847.769	278.037	-569.732	0.867144
ICGC_DO45185	-1216.75	443.938	-772.813	0.881604
ICGC_DO45195	-769.187	404.476	-364.711	0.851765
ICGC_DO45199	-793.629	676.027	-117.602	0.832204
ICGC_DO45201	457.005	1014.48	1471.49	0.681501
ICGC_DO45207	37.7335	389.824	427.558	0.785218
ICGC_DO45209	-1668.32	423.571	-1244.75	0.91216
ICGC_DO45215	-486.574	511.274	24.6997	0.820442
ICGC_DO45217	-1179.6	214.915	-964.685	0.894546
ICGC_DO45229	120.953	1214.68	1335.63	0.695958
ICGC_DO45233	673.496	1221.53	1895.02	0.634716
ICGC_DO45241	-250.033	940.498	690.466	0.760743
ICGC_DO45243	-202.387	560.112	357.724	0.791524
ICGC_DO45249	202.868	1313.26	1516.13	0.676691
ICGC_DO45251	-28.801	975.068	946.267	0.735841
ICGC_DO45255	-884.82	683.769	-201.051	0.838934
ICGC_DO45257	-316.141	787.778	471.637	0.781195
ICGC_DO45259	-932.154	-527.938	-1460.09	0.924657
ICGC_DO45261	352.487	1613.4	1965.89	0.626644
ICGC_DO45273	112.458	923.015	1035.47	0.726911
ICGC_DO45281	-770.552	517.551	-253.002	0.843059
ICGC_DO45285	243.882	1477.62	1721.5	0.654191
ICGC_DO45289	-508.772	-219.344	-728.116	0.878488
ICGC_DO45297	-186.651	524.749	338.098	0.793282
ICGC_DO45307	465.436	1980.76	2446.19	0.570189
ICGC_DO48674	-644.243	367.251	-276.993	0.844948
ICGC_DO48677	-795.219	-783.88	-1579.1	0.931168
ICGC_DO48693	-269.772	2093.59	1823.82	0.642758
ICGC_DO48695	-996.489	-371.615	-1368.1	0.919431
ICGC_DO48697	94.9151	1491.57	1586.49	0.669051
ICGC_DO48701	-464.828	444.241	-20.5872	0.824224
ICGC_DO48704	-210.821	479.834	269.013	0.799415
ICGC_DO48706	-1489.21	-340.462	-1829.68	0.943945
ICGC_DO48715	-909.422	904.32	-5.10168	0.822935
ICGC_DO48716	-323.058	1076.17	753.108	0.754743
ICGC_DO48721	-1338.46	-556.205	-1894.66	0.947051
ICGC_DO48725	-178.358	1276.08	1097.72	0.720606
ICGC_DO48733	453.156	1366.32	1819.48	0.643247
ICGC_DO48736	-167.447	1382.19	1214.75	0.70859
ICGC_DO48737	-766.966	643.5	-123.467	0.832681
ICGC_DO48741	-1351.47	295.379	-1056.09	0.900462
ICGC_DO48742	-78.5917	905.329	826.738	0.747608
ICGC_DO48746	-1175.11	-611.63	-1786.74	0.941846
ICGC_DO48747	792.065	2554.27	3346.34	0.456988
ICGC_DO48759	35.0907	679.802	714.893	0.758411
ICGC_DO48760	-300.378	810.68	510.302	0.77764
ICGC_DO48761	-413.474	1174.16	760.69	0.754012
ICGC_DO50776	21.1171	808.937	830.054	0.747285
ICGC_DO50783	-1072.02	-222.119	-1294.14	0.915107
ICGC_DO50787	-42.3444	1987.79	1945.45	0.62898
ICGC_DO50789	-560.056	-62.178	-622.234	0.870957
ICGC_DO50791	-603.454	656.425	52.9714	0.818062
ICGC_DO50798	-1075.78	20.8735	-1054.91	0.900387
ICGC_DO50800	885.036	1968.11	2853.15	0.520127
ICGC_DO50802	-1024.81	-482.424	-1507.23	0.92727
ICGC_DO50803	163.093	2177.16	2340.25	0.582895
ICGC_DO50805	325.483	1590.21	1915.69	0.632369
ICGC_DO50806	-763.832	1032.01	268.173	0.799489
ICGC_DO50807	-493.719	272.506	-221.213	0.840541
ICGC_DO50811	-1581.4	-747.234	-2328.63	0.96557
ICGC_DO50813	-731.303	230.194	-501.109	0.862083
ICGC_DO50814	-971.013	377.507	-593.506	0.868877
ICGC_DO50816	-1001.02	81.2842	-919.733	0.891577
ICGC_DO50817	-1157.56	62.5848	-1094.98	0.90293
ICGC_DO50818	-505.515	1173.21	667.7	0.762908
ICGC_DO50819	237.119	2435.13	2672.25	0.542621
ICGC_DO50820	-510.379	-97.1683	-607.547	0.869895
ICGC_DO50832	-1300.11	-559.655	-1859.77	0.945394
ICGC_DO50839	-732.391	-242.047	-974.438	0.895185
ICGC_DO50840	-864.364	198.879	-665.484	0.874059
ICGC_DO50845	-552.036	980.917	428.881	0.785098
ICGC_DO50855	-70.2518	817.818	747.566	0.755276
ICGC_DO50857	-1008.76	342.338	-666.42	0.874125
TCGA_TCGA-2Y-A9GT	-71.7024	1639.97	1568.26	0.671037
TCGA_TCGA-2Y-A9GU	-944.298	-107.748	-1052.05	0.900204
TCGA_TCGA-2Y-A9GV	-4.33963	995.905	991.565	0.731322
TCGA_TCGA-2Y-A9GW	131.98	1591.01	1722.99	0.654026
TCGA_TCGA-2Y-A9GZ	-954.923	-360.658	-1315.58	0.916372
TCGA_TCGA-2Y-A9H1	-872.469	1183.62	311.149	0.795684
TCGA_TCGA-2Y-A9H3	-91.5943	1900.72	1809.13	0.644409
TCGA_TCGA-2Y-A9H4	-713.113	649.427	-63.6853	0.82779
TCGA_TCGA-2Y-A9H6	32.9313	1188.63	1221.56	0.707884
TCGA_TCGA-2Y-A9H7	-1127.84	413.972	-713.871	0.877487
TCGA_TCGA-2Y-A9H8	-817.917	1030.43	212.514	0.80437
TCGA_TCGA-2Y-A9H9	-605.516	412.72	-192.797	0.838274
TCGA_TCGA-2Y-A9HB	-130.784	1063.14	932.352	0.737223
TCGA_TCGA-3K-AAZ8	-961.587	501.948	-459.639	0.858982
TCGA_TCGA-4R-AA8I	-641.571	263.636	-377.934	0.85278
TCGA_TCGA-5C-AAPD	-161.351	1821.94	1660.59	0.660927
TCGA_TCGA-5R-AA1D	1227.57	1145.97	2373.54	0.578918
TCGA_TCGA-5R-AAAM	576.565	1212.02	1788.58	0.646712
TCGA_TCGA-BC-A10S	111.506	1235.61	1347.12	0.694747
TCGA_TCGA-BC-A10X	436.389	968.116	1404.5	0.688663
TCGA_TCGA-BC-A10Y	-725.204	529.333	-195.871	0.83852
TCGA_TCGA-BC-A110	754.723	1673.3	2428.03	0.572378
TCGA_TCGA-BC-A216	-894.229	1022.52	128.288	0.811654
TCGA_TCGA-BC-A217	-1011.84	821.057	-190.788	0.838113
TCGA_TCGA-BC-A3KF	-755.246	-16.6644	-771.91	0.881541
TCGA_TCGA-BC-A5W4	-1494.29	-595.374	-2089.66	0.955852
TCGA_TCGA-BC-A69H	-744.91	1013.59	268.682	0.799444
TCGA_TCGA-BC-A69I	-201.353	523.956	322.603	0.794665
TCGA_TCGA-BD-A2L6	-613.35	491.063	-122.287	0.832586
TCGA_TCGA-BD-A3EP	268.36	1599.44	1867.8	0.6378
TCGA_TCGA-BD-A3ER	189.995	679.285	869.28	0.743446
TCGA_TCGA-BW-A5NO	-577.221	638.553	61.3324	0.817356
TCGA_TCGA-CC-5259	-1328.58	604.913	-723.663	0.878176
TCGA_TCGA-CC-A123	-838.197	393.274	-444.922	0.857874
TCGA_TCGA-CC-A7IF	-1080.08	-264.482	-1344.56	0.918066
TCGA_TCGA-CC-A7IG	-883.351	572.521	-310.83	0.847594
TCGA_TCGA-CC-A7IH	-948.281	-418.132	-1366.41	0.919333
TCGA_TCGA-CC-A7II	-714.911	-262.609	-977.52	0.895386
TCGA_TCGA-CC-A7IL	-1620.15	-523.571	-2143.73	0.958154
TCGA_TCGA-DD-A119	-321.811	392.062	70.2513	0.816601
TCGA_TCGA-DD-A11B	-795.05	-272.431	-1067.48	0.901188
TCGA_TCGA-DD-A11D	-582.799	68.046	-514.753	0.863096
TCGA_TCGA-DD-A1EB	-491.27	167.29	-323.98	0.848617
TCGA_TCGA-DD-A1ED	4.72834	1224.15	1228.88	0.707125
TCGA_TCGA-DD-A39V	-329.561	1449.66	1120.1	0.718325
TCGA_TCGA-DD-A39X	-398.242	643.036	244.794	0.801546
TCGA_TCGA-DD-A39Z	-1452.26	-218.845	-1671.1	0.936006
TCGA_TCGA-DD-A3A2	-517.026	196.62	-320.406	0.848339
TCGA_TCGA-DD-A3A3	-1349.23	322.102	-1027.13	0.898605
TCGA_TCGA-DD-A3A5	-620.909	170.471	-450.438	0.85829
TCGA_TCGA-DD-A3A6	696.754	1448.58	2145.33	0.605902
TCGA_TCGA-DD-A3A8	-1141.74	-168.172	-1309.91	0.916038
TCGA_TCGA-DD-A3A9	-11.6495	961.293	949.644	0.735505
TCGA_TCGA-DD-A4NI	-42.492	1148.54	1106.05	0.719758
TCGA_TCGA-DD-A4NK	-641.596	-41.8269	-683.423	0.875335
TCGA_TCGA-DD-A4NL	-144.615	459.835	315.221	0.795322
TCGA_TCGA-DD-A4NN	-766.903	-364.229	-1131.13	0.905198
TCGA_TCGA-DD-A4NP	-668.752	222.922	-445.83	0.857943
TCGA_TCGA-DD-A4NV	-158.217	333.478	175.261	0.807607
TCGA_TCGA-DD-A73A	-847.679	980.801	133.122	0.811239
TCGA_TCGA-DD-A73B	-1109.42	-267.337	-1376.75	0.919929
TCGA_TCGA-DD-A73D	-1573.34	-672.576	-2245.91	0.96234
TCGA_TCGA-DD-A73G	-684.986	683.392	-1.59448	0.822642
TCGA_TCGA-DD-AAC9	243.551	1212.77	1456.32	0.683129
TCGA_TCGA-DD-AACC	227.199	2699.47	2926.67	0.51088
TCGA_TCGA-DD-AACD	-309.798	1116.57	806.768	0.749552
TCGA_TCGA-DD-AACE	-652.849	-42.6887	-695.538	0.876193
TCGA_TCGA-DD-AACF	-864.661	787.153	-77.5081	0.828927
TCGA_TCGA-DD-AACG	-1157.35	834.382	-322.964	0.848538
TCGA_TCGA-DD-AACI	-84.252	1928.12	1843.87	0.640501
TCGA_TCGA-DD-AACJ	-1292.55	13.8721	-1278.68	0.91419
TCGA_TCGA-DD-AACL	-376.576	1871.7	1495.12	0.678958
TCGA_TCGA-DD-AACO	-427.829	1015.64	587.811	0.770436
TCGA_TCGA-DD-AACQ	-1524.03	-505.336	-2029.36	0.953214
TCGA_TCGA-DD-AACT	-280.767	1058.52	777.756	0.752364
TCGA_TCGA-DD-AACV	-1354.09	-631.468	-1985.56	0.951251
TCGA_TCGA-DD-AACW	-1051.42	256.722	-794.697	0.883115
TCGA_TCGA-DD-AACY	-687.443	397.075	-290.368	0.845997
TCGA_TCGA-DD-AAD2	375.81	1114.26	1490.07	0.679502
TCGA_TCGA-DD-AAD3	105.261	804.399	909.659	0.739469
TCGA_TCGA-DD-AAD6	-1443.58	80.7011	-1362.88	0.919129
TCGA_TCGA-DD-AAD8	-875.14	173.765	-701.375	0.876606
TCGA_TCGA-DD-AADA	-191.192	1155.62	964.432	0.734033
TCGA_TCGA-DD-AADF	-1135.92	382.849	-753.076	0.880232
TCGA_TCGA-DD-AADI	-105.873	1659.66	1553.79	0.672611
TCGA_TCGA-DD-AADJ	-974.552	512.835	-461.717	0.859139
TCGA_TCGA-DD-AADK	-128.027	907.893	779.866	0.75216
TCGA_TCGA-DD-AADM	-539.068	584.066	44.9983	0.818735
TCGA_TCGA-DD-AADN	-1101.84	2102.31	1000.47	0.73043
TCGA_TCGA-DD-AADO	-754.513	1543.82	789.306	0.751246
TCGA_TCGA-DD-AADQ	-1113.41	558.867	-554.548	0.866032
TCGA_TCGA-DD-AADR	-752.809	642.465	-110.344	0.831613
TCGA_TCGA-DD-AADS	-673.914	1496.01	822.091	0.748061
TCGA_TCGA-DD-AADU	-1285.5	14.4322	-1271.07	0.913737
TCGA_TCGA-DD-AAE0	-606.665	164.462	-442.203	0.857669
TCGA_TCGA-DD-AAE1	-1050.02	423.593	-626.425	0.871259
TCGA_TCGA-DD-AAE2	-103.447	1021.38	917.937	0.738651
TCGA_TCGA-DD-AAE3	-104.58	429.336	324.756	0.794473
TCGA_TCGA-DD-AAE4	125.962	1840	1965.97	0.626635
TCGA_TCGA-DD-AAE6	-1659.33	-932.438	-2591.77	0.974895
TCGA_TCGA-DD-AAE7	-141.022	974.61	833.588	0.74694
TCGA_TCGA-DD-AAEA	-980.647	819.424	-161.223	0.835738
TCGA_TCGA-DD-AAEB	-770.873	375.026	-395.847	0.85415
TCGA_TCGA-DD-AAED	-1441.08	255.668	-1185.42	0.908556
TCGA_TCGA-DD-AAEG	-951.513	-185.099	-1136.61	0.90554
TCGA_TCGA-DD-AAEH	-105.111	1561.05	1455.94	0.683169
TCGA_TCGA-DD-AAEI	-614.101	814.793	200.693	0.8054
TCGA_TCGA-DD-AAVQ	-190.608	2125.4	1934.79	0.630195
TCGA_TCGA-DD-AAVR	482.265	1809.52	2291.79	0.588661
TCGA_TCGA-DD-AAVU	-1191.88	51.9014	-1139.98	0.90575
TCGA_TCGA-DD-AAVX	-404.054	1032.53	628.473	0.766617
TCGA_TCGA-DD-AAVY	-1136.87	-262.556	-1399.43	0.921229
TCGA_TCGA-DD-AAW1	-888.223	-109.792	-998.014	0.896722
TCGA_TCGA-DD-AAW3	-860.458	-282.226	-1142.68	0.905918
TCGA_TCGA-ED-A4XI	272.769	1267.02	1539.79	0.67413
TCGA_TCGA-ED-A627	798.429	2025.77	2824.2	0.523752
TCGA_TCGA-ED-A7PY	-1285.19	-219.125	-1504.32	0.92711
TCGA_TCGA-ED-A7XO	-57.3325	895.641	838.309	0.746479
TCGA_TCGA-EP-A26S	-816.757	-253.237	-1069.99	0.901348
TCGA_TCGA-EP-A2KA	-714.4	1509.67	795.274	0.750668
TCGA_TCGA-EP-A2KB	-1106.59	30.6163	-1075.98	0.901728
TCGA_TCGA-EP-A2KC	-726.73	220.214	-506.517	0.862485
TCGA_TCGA-EP-A3JL	80.9548	1470.49	1551.44	0.672866
TCGA_TCGA-ES-A2HS	-469.334	-13.9424	-483.277	0.860754
TCGA_TCGA-ES-A2HT	-158.015	769.97	611.955	0.768172
TCGA_TCGA-FV-A23B	-559.325	584.874	25.5491	0.820371
TCGA_TCGA-FV-A495	135.164	1430.26	1565.42	0.671346
TCGA_TCGA-FV-A496	-1341.13	-574.882	-1916.01	0.948053
TCGA_TCGA-FV-A4ZP	-736.417	1305.33	568.915	0.772202
TCGA_TCGA-G3-A25U	-1051.97	-171.801	-1223.77	0.910893
TCGA_TCGA-G3-A25V	143.935	1257.84	1401.78	0.688954
TCGA_TCGA-G3-A25X	-0.970052	1564.3	1563.33	0.671573
TCGA_TCGA-G3-A25Z	-378.424	480.793	102.368	0.813871
TCGA_TCGA-G3-A3CG	-338.858	533.579	194.721	0.805919
TCGA_TCGA-G3-A3CH	-321.419	713.622	392.203	0.788421
TCGA_TCGA-G3-A3CI	-278.163	1057.18	779.014	0.752243
TCGA_TCGA-G3-A3CJ	-809.034	247.383	-561.65	0.866553
TCGA_TCGA-G3-A3CK	-599.18	797.814	198.634	0.805579
TCGA_TCGA-G3-A5SI	-1037.2	-456.267	-1493.47	0.926511
TCGA_TCGA-G3-A5SJ	-464.756	1364.48	899.727	0.74045
TCGA_TCGA-G3-A5SK	-165.456	1104.81	939.352	0.736528
TCGA_TCGA-G3-A5SM	157.64	1080.56	1238.2	0.706157
TCGA_TCGA-G3-A6UC	-1145.76	-203.752	-1349.51	0.918354
TCGA_TCGA-G3-A7M5	-926.298	427.818	-498.48	0.861888
TCGA_TCGA-G3-A7M7	-778.903	-8.2432	-787.146	0.882595
TCGA_TCGA-G3-A7M8	-215.938	354.361	138.423	0.810784
TCGA_TCGA-G3-AAUZ	-325.292	1113.64	788.349	0.751339
TCGA_TCGA-G3-AAV0	-806.332	289.165	-517.167	0.863275
TCGA_TCGA-G3-AAV2	-735.457	111.868	-623.59	0.871054
TCGA_TCGA-G3-AAV5	-1079.72	145.626	-934.098	0.89253
TCGA_TCGA-HP-A5MZ	708.226	1671.74	2379.96	0.578149
TCGA_TCGA-HP-A5N0	241.599	628.111	869.711	0.743404
TCGA_TCGA-K7-A5RF	371.393	1448.91	1820.3	0.643154
TCGA_TCGA-K7-A5RG	-67.4809	2586.25	2518.77	0.561406
TCGA_TCGA-K7-A6G5	-282.484	919.82	637.336	0.765781
TCGA_TCGA-KR-A7K0	-454.655	373.236	-81.419	0.829248
TCGA_TCGA-KR-A7K2	-308.716	669.278	360.563	0.79127
TCGA_TCGA-KR-A7K7	-1051.81	1295.61	243.806	0.801633
TCGA_TCGA-KR-A7K8	-86.0949	1731.4	1645.31	0.662609
TCGA_TCGA-LG-A9QD	-720.272	549.483	-170.788	0.836508
TCGA_TCGA-MI-A75C	-1438.21	696.787	-741.427	0.87942
TCGA_TCGA-MI-A75E	-62.5004	1022.53	960.027	0.734472
TCGA_TCGA-MI-A75G	-1090.64	-285.921	-1376.56	0.919919
TCGA_TCGA-MI-A75H	-472.029	1123.84	651.815	0.764413
TCGA_TCGA-MR-A520	-662.518	300.279	-362.24	0.851575
TCGA_TCGA-MR-A8JO	814.041	1607.46	2421.5	0.573163
TCGA_TCGA-NI-A4U2	-406.931	227.936	-178.995	0.837167
TCGA_TCGA-NI-A8LF	-349.118	100.958	-248.16	0.842677
TCGA_TCGA-O8-A75V	-155.659	1265.52	1109.86	0.71937
TCGA_TCGA-PD-A5DF	264.688	978.559	1243.25	0.705632
TCGA_TCGA-QA-A7B7	-1264.56	94.4735	-1170.09	0.907614
TCGA_TCGA-RC-A6M4	-1314.84	-650.435	-1965.28	0.950328
TCGA_TCGA-RC-A6M5	403.853	291.468	695.32	0.76028
TCGA_TCGA-RC-A7S9	-1137.98	633.49	-504.487	0.862334
TCGA_TCGA-RC-A7SB	-999.501	107.97	-891.531	0.889694
TCGA_TCGA-RC-A7SF	-946.224	353	-593.224	0.868856
TCGA_TCGA-RC-A7SH	-1241.63	-384.368	-1626	0.933655
TCGA_TCGA-UB-A7ME	-343.473	1320.82	977.343	0.732745
TCGA_TCGA-UB-A7MF	-542.888	1902.41	1359.52	0.693436
TCGA_TCGA-UB-AA0V	200.092	708.027	908.119	0.739622
TCGA_TCGA-WJ-A86L	-1345.92	-43.3868	-1389.31	0.920651
TCGA_TCGA-WQ-A9G7	-1265.76	-167.67	-1433.43	0.92316
TCGA_TCGA-WQ-AB4B	-208.482	685.36	476.878	0.780715
TCGA_TCGA-WX-AA46	-205.624	491.962	286.337	0.797885
TCGA_TCGA-WX-AA47	-1467.45	-483.842	-1951.29	0.949687
TCGA_TCGA-XR-A8TC	-714.067	-147.367	-861.433	0.887669
TCGA_TCGA-XR-A8TD	489.673	2024.5	2514.17	0.561964
TCGA_TCGA-XR-A8TF	-1066.68	-15.1836	-1081.86	0.902101
TCGA_TCGA-ZP-A9CV	-65.3546	1056.06	990.71	0.731408
TCGA_TCGA-ZP-A9CY	-12.1293	708.048	695.919	0.760223
TCGA_TCGA-ZP-A9D4	-918.819	-155.113	-1073.93	0.901598
TCGA_TCGA-ZS-A9CD	-189.656	734.381	544.725	0.774453
TCGA_TCGA-ZS-A9CE	-1211.31	-492.077	-1703.39	0.937664
TCGA_TCGA-ZS-A9CF	-742.634	486.313	-256.32	0.843321
TCGA_TCGA-ZS-A9CG	-642.948	134.011	-508.937	0.862665
