# Supplementary material for: Identification and characterization of a novel molecular classification based on disulfidptosis-related genes to predict prognosis and immunotherapy efficacy in hepatocellular carcinoma
Source: Aging (Albany NY). 2023 Jul 3;15(13):6135–51. doi: 10.18632/aging.204809 (PMC10373967; doi:10.18632/aging.204809)
Supplement: Supplementary Table 6 [file aging-15-204809-s007.xlsx]

## Sheet: Sheet1
Supplementary Table 6. The DRG.score for each HCC patients.
id	DRG.score
TCGA-DD-AAEK	-1.45829
TCGA-DD-A4ND	-1.07642
TCGA-2Y-A9H7	-0.220068
TCGA-RC-A7S9	-1.13451
TCGA-DD-AADI	-1.54683
TCGA-DD-A4NA	4.60542
TCGA-BC-A10T	-2.28955
TCGA-RC-A7SH	-0.799351
TCGA-WJ-A86L	-0.421404
TCGA-DD-AA3A	4.12934
TCGA-CC-A7IE	1.27064
TCGA-DD-AAVS	-1.68047
TCGA-DD-AAE7	-0.987894
TCGA-BC-A3KG	0.344149
TCGA-DD-A3A2	-3.07677
TCGA-DD-AAVR	0.922728
TCGA-CC-A7II	3.91295
TCGA-DD-AACN	-1.97629
TCGA-2Y-A9GX	-0.191007
TCGA-CC-A3MA	2.83827
TCGA-DD-AACQ	-1.44585
TCGA-RC-A7SF	-0.153321
TCGA-DD-AADW	-0.266062
TCGA-G3-A3CH	-2.04237
TCGA-DD-A1EI	-0.520312
TCGA-ZP-A9CZ	-0.967026
TCGA-KR-A7K0	1.62498
TCGA-BC-A10Y	-2.8667
TCGA-ED-A8O5	-1.95778
TCGA-CC-A9FS	-2.44557
TCGA-UB-A7MB	-2.05029
TCGA-ED-A627	-1.74981
TCGA-XR-A8TE	1.50694
TCGA-DD-AACF	-2.19961
TCGA-K7-A5RF	-1.98152
TCGA-ZP-A9D1	1.64303
TCGA-DD-AADB	-0.270007
TCGA-DD-AAVZ	-2.00597
TCGA-BC-A216	0.45834
TCGA-DD-A1EF	-0.542578
TCGA-DD-AADL	-2.18329
TCGA-KR-A7K8	-1.43506
TCGA-ED-A7PX	3.75942
TCGA-DD-AADK	0.734809
TCGA-BW-A5NO	-1.23827
TCGA-DD-A39W	2.50048
TCGA-GJ-A9DB	-0.966011
TCGA-DD-A1EA	1.09638
TCGA-UB-A7MD	1.44696
TCGA-ES-A2HS	-2.44772
TCGA-G3-A3CJ	-0.648527
TCGA-FV-A3R2	-2.39446
TCGA-2Y-A9GZ	-3.06026
TCGA-4R-AA8I	-0.887515
TCGA-DD-A4NG	1.34617
TCGA-RC-A6M5	0.787875
TCGA-2Y-A9H0	-0.252701
TCGA-DD-A11B	-2.66228
TCGA-G3-A25V	-0.522193
TCGA-DD-AADQ	-0.0496332
TCGA-CC-A8HS	-1.83369
TCGA-DD-A1EL	4.04232
TCGA-WQ-AB4B	-1.82561
TCGA-5R-AA1C	2.42932
TCGA-ED-A8O6	0.106527
TCGA-DD-AADD	-0.011117
TCGA-BC-A10S	-1.74222
TCGA-DD-AAEB	-1.84199
TCGA-WX-AA44	1.09141
TCGA-PD-A5DF	-0.423444
TCGA-YA-A8S7	3.40126
TCGA-5R-AA1D	1.58571
TCGA-DD-AACH	2.6141
TCGA-CC-A8HV	0.519676
TCGA-G3-AAV0	-2.90366
TCGA-DD-AAED	0.423891
TCGA-ZS-A9CG	0.330613
TCGA-K7-A6G5	-0.615593
TCGA-DD-AADS	-2.4677
TCGA-DD-A3A3	3.15069
TCGA-2Y-A9H8	-0.387541
TCGA-G3-A7M6	1.17133
TCGA-FV-A2QQ	0.204322
TCGA-ZP-A9D4	-1.00591
TCGA-LG-A9QD	-1.75996
TCGA-RC-A6M4	-1.12203
TCGA-ED-A7XP	1.81326
TCGA-2Y-A9HA	2.4495
TCGA-DD-AAE2	-3.17036
TCGA-DD-AADF	-1.62069
TCGA-DD-AACW	-2.674
TCGA-MI-A75I	0.106989
TCGA-FV-A3I0	5.30428
TCGA-2Y-A9H1	1.1795
TCGA-CC-A8HU	-0.415562
TCGA-DD-AAD2	0.382412
TCGA-BC-A10R	2.39479
TCGA-G3-A5SL	-0.100701
TCGA-CC-A1HT	2.8565
TCGA-2Y-A9GV	-2.56536
TCGA-ED-A7XO	-2.39153
TCGA-CC-A5UC	0.43831
TCGA-UB-A7ME	-1.27934
TCGA-G3-A7M9	1.8132
TCGA-DD-AACJ	3.49319
TCGA-DD-A4NK	-3.29555
TCGA-DD-A3A5	-3.60731
TCGA-G3-A7M7	-0.743654
TCGA-G3-AAUZ	-3.17497
TCGA-RC-A7SK	0.3018
TCGA-DD-AACI	1.00822
TCGA-DD-A4NH	1.27077
TCGA-WX-AA46	-3.18514
TCGA-DD-A4NQ	2.63485
TCGA-G3-A5SM	0.520723
TCGA-MI-A75E	-0.812413
TCGA-DD-A11D	-1.49418
TCGA-CC-5262	1.02235
TCGA-2Y-A9GY	2.34844
TCGA-ES-A2HT	0.201917
TCGA-DD-AAW0	-1.32676
TCGA-G3-A3CI	-2.53777
TCGA-DD-AAVV	0.406569
TCGA-DD-A39Y	3.8147
TCGA-DD-A1EB	-2.53243
TCGA-DD-AAD1	-1.3501
TCGA-G3-A3CK	1.23059
TCGA-5C-A9VH	-0.81193
TCGA-FV-A23B	-1.07117
TCGA-DD-AADR	1.1614
TCGA-DD-A4NO	-0.368201
TCGA-BC-A10W	4.11892
TCGA-LG-A9QC	-1.80359
TCGA-DD-A11C	-2.1494
TCGA-DD-AACV	-2.81007
TCGA-CC-5264	0.136268
TCGA-DD-AACL	1.14154
TCGA-DD-A116	1.12782
TCGA-CC-A7IG	2.08616
TCGA-DD-AAE9	0.842208
TCGA-DD-AAVP	-0.93143
TCGA-G3-AAV5	2.60938
TCGA-NI-A8LF	-0.0190804
TCGA-DD-A39Z	-1.03284
TCGA-ZS-A9CF	-1.88592
TCGA-EP-A3RK	3.05628
TCGA-FV-A496	-0.0688372
TCGA-CC-A3MB	-0.463218
TCGA-CC-A7IF	-1.20055
TCGA-ZS-A9CD	0.363668
TCGA-G3-A25S	1.34945
TCGA-BC-A217	-0.105166
TCGA-DD-AAW2	-2.3144
TCGA-ED-A97K	0.817821
TCGA-DD-AAVW	-1.45369
TCGA-DD-A73F	-2.90837
TCGA-DD-A4NN	-0.92492
TCGA-DD-AAEI	0.309803
TCGA-UB-AA0V	-1.96921
TCGA-DD-AADO	0.5158
TCGA-DD-AAVY	0.784444
TCGA-FV-A3R3	1.1422
TCGA-DD-A4NS	0.288269
TCGA-MI-A75H	2.00271
TCGA-UB-A7MC	1.33743
TCGA-FV-A4ZQ	1.16221
TCGA-DD-AAEG	-0.292495
TCGA-DD-AAD5	5.26158
TCGA-K7-A5RG	-0.46891
TCGA-XR-A8TD	-0.683396
TCGA-DD-AACY	-1.40193
TCGA-KR-A7K7	2.30658
TCGA-G3-A25Y	-0.641077
TCGA-K7-AAU7	2.18917
TCGA-BC-A3KF	-3.63081
TCGA-2Y-A9H2	1.55257
TCGA-DD-AAW3	-2.04879
TCGA-ED-A82E	5.51338
TCGA-DD-A4NP	-1.75206
TCGA-G3-A6UC	-2.5036
TCGA-DD-AAW1	0.0408032
TCGA-DD-A118	0.551098
TCGA-DD-AADA	-0.696192
TCGA-ED-A66Y	0.904612
TCGA-DD-AAE3	-3.07988
TCGA-G3-AAV6	-0.204673
TCGA-DD-A4NE	-1.09468
TCGA-DD-AADV	-1.46698
TCGA-DD-AACA	1.15283
TCGA-DD-AACX	2.13129
TCGA-DD-AACC	-1.40715
TCGA-G3-A5SK	-3.18105
TCGA-CC-A3MC	2.00858
TCGA-DD-A73A	-0.712691
TCGA-DD-AADG	-1.71927
TCGA-DD-A4NL	-2.53454
TCGA-BC-A10Q	5.61213
TCGA-2Y-A9GU	-1.84294
TCGA-ZP-A9CV	-0.140864
TCGA-DD-A113	1.29518
TCGA-2Y-A9GT	-3.57408
TCGA-DD-A39X	1.83569
TCGA-DD-AACU	-1.52268
TCGA-WX-AA47	2.34013
TCGA-DD-A3A4	-0.308649
TCGA-ED-A7PY	-2.43674
TCGA-EP-A2KC	0.867962
TCGA-BC-A10X	-1.96082
TCGA-CC-A7IH	-1.6935
TCGA-FV-A495	-1.26457
TCGA-DD-A1EH	-0.382042
TCGA-DD-AAEH	-3.32935
TCGA-DD-AAEE	0.692844
TCGA-ZP-A9D0	-1.47793
TCGA-DD-A1EG	1.60115
TCGA-2Y-A9H6	-1.02865
TCGA-2Y-A9GW	1.16248
TCGA-DD-A73D	-0.925765
TCGA-DD-A115	-1.82917
TCGA-XR-A8TF	-0.399074
TCGA-DD-A4NI	-2.5174
TCGA-G3-AAV3	1.36527
TCGA-UB-A7MA	3.52621
TCGA-UB-A7MF	0.620678
TCGA-BC-A112	3.52692
TCGA-BC-A10U	0.842077
TCGA-BC-A5W4	-1.22817
TCGA-FV-A3I1	1.16935
TCGA-CC-A123	-0.239544
TCGA-WQ-A9G7	0.584666
TCGA-ED-A66X	0.671399
TCGA-DD-A1EK	0.11426
TCGA-DD-AADM	0.416054
TCGA-MR-A8JO	2.50117
TCGA-QA-A7B7	-1.19796
TCGA-CC-A8HT	0.780442
TCGA-FV-A4ZP	2.98347
TCGA-DD-A4NJ	-0.83966
TCGA-CC-5258	-0.355633
TCGA-EP-A2KB	-1.77927
TCGA-G3-A25X	3.00492
TCGA-CC-A5UD	3.47134
TCGA-DD-A119	1.42437
TCGA-DD-AACB	3.16289
TCGA-DD-AAE4	-3.42307
TCGA-CC-A3M9	3.81256
TCGA-CC-A7IL	-0.993347
TCGA-BC-A10Z	-2.11349
TCGA-UB-AA0U	-1.51893
TCGA-DD-A3A8	0.0143688
TCGA-ED-A4XI	-0.781713
TCGA-HP-A5MZ	0.760741
TCGA-DD-AAVU	0.450564
TCGA-DD-AAD6	2.10268
TCGA-EP-A26S	-1.05701
TCGA-DD-AAVX	1.34216
TCGA-ED-A7PZ	1.51269
TCGA-LG-A6GG	0.659686
TCGA-DD-AADC	2.71121
TCGA-DD-A3A7	2.13595
TCGA-DD-AACE	-1.37123
TCGA-2Y-A9H3	-0.843069
TCGA-DD-A4NB	1.93338
TCGA-G3-A5SI	-1.59246
TCGA-DD-AAE6	-2.60563
TCGA-DD-AACG	-0.121685
TCGA-5C-A9VG	0.682528
TCGA-DD-A1EE	1.48225
TCGA-BC-A110	-2.48222
TCGA-GJ-A3OU	0.993585
TCGA-G3-A25U	-3.39182
TCGA-G3-A3CG	0.108369
TCGA-CC-5260	5.18898
TCGA-CC-A7IJ	3.97276
TCGA-DD-AADU	3.56244
TCGA-DD-AAE1	-1.47622
TCGA-2Y-A9HB	-1.13265
TCGA-BD-A2L6	-2.9114
TCGA-DD-A3A9	1.77612
TCGA-KR-A7K2	-1.69075
TCGA-DD-A3A1	2.04161
TCGA-DD-A4NR	1.94388
TCGA-DD-AAC9	0.508446
TCGA-CC-5259	1.47491
TCGA-EP-A2KA	2.31458
TCGA-DD-A1EC	2.17341
TCGA-DD-AAD3	-1.84897
TCGA-DD-AACS	-3.16637
TCGA-BD-A3ER	0.618574
TCGA-GJ-A6C0	0.299544
TCGA-2Y-A9GS	0.284775
TCGA-BC-A8YO	0.349131
TCGA-CC-A9FW	0.81407
TCGA-DD-A1ED	-1.77327
TCGA-EP-A12J	-1.24802
TCGA-DD-A1EJ	1.00133
TCGA-G3-AAV2	-0.593755
TCGA-DD-AADY	-2.64286
TCGA-CC-5263	2.15873
TCGA-DD-AADP	-0.559643
TCGA-BC-A69I	-0.803482
TCGA-G3-AAV1	1.07616
TCGA-O8-A75V	0.658786
TCGA-ZP-A9CY	-1.57241
TCGA-G3-A7M8	-2.31454
TCGA-DD-AAE0	0.679548
TCGA-ZS-A9CE	-2.38276
TCGA-DD-A73B	-2.48513
TCGA-RC-A7SB	-1.46328
TCGA-DD-AADN	2.80175
TCGA-CC-A5UE	2.29436
TCGA-DD-AACZ	2.93244
TCGA-DD-AAVQ	-1.78408
TCGA-BD-A3EP	1.06566
TCGA-DD-A39V	3.61809
TCGA-NI-A4U2	-1.65637
TCGA-DD-A4NF	2.8792
TCGA-DD-A11A	-0.00952143
TCGA-DD-AAD0	0.270687
TCGA-DD-A3A6	2.44235
TCGA-DD-A114	0.0347762
TCGA-5C-AAPD	0.27128
TCGA-HP-A5N0	-3.7773
TCGA-T1-A6J8	1.22337
TCGA-XR-A8TC	-2.41016
TCGA-DD-AACK	1.29831
TCGA-MI-A75C	3.04724
TCGA-DD-AACP	2.0529
TCGA-DD-AACT	-0.144406
TCGA-DD-A73E	-0.0968185
TCGA-BC-4072	0.95948
TCGA-BC-4073	1.90449
TCGA-XR-A8TG	-1.13334
TCGA-RC-A6M6	2.24835
TCGA-BC-A69H	2.13808
TCGA-DD-AAC8	4.99554
TCGA-DD-AADJ	-1.37314
TCGA-2Y-A9H9	-2.2607
TCGA-ED-A5KG	1.41083
TCGA-DD-AACO	-0.971468
TCGA-G3-A25Z	-0.750352
TCGA-DD-A4NV	-3.22844
TCGA-FV-A2QR	-0.183015
TCGA-G3-AAV7	3.04885
TCGA-2Y-A9H4	-3.37116
TCGA-3K-AAZ8	-1.78338
TCGA-CC-5261	-0.262269
TCGA-ZP-A9D2	1.97131
TCGA-2Y-A9H5	-1.1198
TCGA-G3-A25T	1.99316
TCGA-DD-AAEA	-2.54564
TCGA-RG-A7D4	1.80411
TCGA-DD-AACD	0.190976
TCGA-DD-AAD8	-0.682967
TCGA-5R-AAAM	-2.13864
TCGA-EP-A3JL	0.692803
TCGA-DD-A73G	-0.937973
TCGA-G3-AAV4	2.19529
TCGA-ED-A459	0.711825
TCGA-DD-A73C	-3.051
TCGA-MR-A520	-3.05344
TCGA-G3-A7M5	-3.19536
TCGA-MI-A75G	-2.26473
TCGA-CC-A7IK	3.25576
TCGA-G3-A5SJ	1.54195
DO45095	1.15102
DO50778	4.06008
DO45094	-1.76651
DO48720	2.29906
DO45133	-0.449587
DO45277	2.0266
DO23541	0.499685
DO50803	-0.436741
DO45097	-0.454093
DO23547	2.19821
DO50857	-1.57617
DO50822	2.44226
DO45101	-3.17186
DO45221	1.46328
DO45173	-0.936185
DO45281	-1.93763
DO23539	0.4576
DO50829	2.90044
DO23532	-2.08331
DO45267	3.16466
DO45141	-0.709681
DO45093	0.72916
DO23516	-0.29723
DO50859	1.95393
DO45279	4.25577
DO45237	-2.38795
DO23513	2.32567
DO45245	2.3402
DO23508	0.555007
DO45243	-0.910091
DO23543	-2.3022
DO45227	-0.694903
DO45181	-2.95436
DO45207	-1.55904
DO48674	-4.03553
DO45185	2.14566
DO50840	-3.1369
DO50820	-2.23277
DO45163	1.80379
DO45197	-1.2466
DO50825	1.41741
DO50799	0.317572
DO45283	5.64251
DO50805	1.16498
DO50839	-1.91287
DO45159	0.60998
DO50783	-0.818668
DO23511	1.79495
DO23527	-3.00543
DO50804	-1.87556
DO45149	-2.83662
DO45239	0.105412
DO45217	-0.464885
DO45203	-1.89552
DO45165	0.895404
DO50817	-3.34509
DO50832	-2.27221
DO45297	3.21903
DO50800	-2.11892
DO48728	0.383826
DO45161	0.249904
DO45189	0.634624
DO48716	-0.612076
DO48719	0.910736
DO45099	-3.03256
DO23523	1.99168
DO45209	0.905234
DO23542	2.01204
DO45109	-1.86949
DO50791	1.34436
DO50850	0.726544
DO45153	-1.04224
DO45305	3.78901
DO45183	-0.45183
DO45143	-0.488459
DO45287	1.1337
DO45199	2.0233
DO50845	2.10866
DO45177	-1.06099
DO23528	-2.75331
DO45201	-2.1268
DO45157	0.890414
DO50819	-0.858131
DO23531	-3.44186
DO50802	1.82652
DO50818	-2.31479
DO23550	-1.93923
DO45169	2.93869
DO48704	0.413328
DO23525	1.38884
DO45113	-0.421993
DO45223	-0.809799
DO48757	1.17208
DO23536	-0.815157
DO23521	3.6325
DO23545	-1.32385
DO50816	-1.07227
DO23519	3.46829
DO48681	-0.0881136
DO23548	-1.1486
DO48741	-1.73382
DO45241	-0.0266302
DO50807	-3.44279
DO48700	1.60609
DO45307	2.85871
DO48672	1.96769
DO48693	-0.258961
DO45289	4.8438
DO23533	1.67886
DO45299	2.74608
DO23512	-1.56241
DO45139	-1.66799
DO45255	-1.92231
DO48682	2.8045
DO50806	1.61515
DO45171	1.78972
DO48747	2.67353
DO45205	1.42152
DO45285	2.78259
DO48751	3.20155
DO45187	-0.401672
DO50809	-0.38416
DO45225	-0.199484
DO45193	-1.12576
DO45195	-3.1596
DO48743	-0.0839634
DO48695	-0.290944
DO45213	-0.999638
DO23510	1.52586
DO48677	-2.65532
DO50776	-0.822584
DO48723	3.51968
DO23529	3.65708
DO23524	1.05744
DO48715	-2.31054
DO45125	-4.1297
DO45273	2.37512
DO45215	-2.89329
DO45167	-1.31863
DO45229	-1.0949
DO50814	-0.838326
DO45121	-0.819012
DO23552	-3.13956
DO45117	1.06973
DO23534	-2.37126
DO45263	0.884245
DO45115	-0.915245
DO23537	-1.52613
DO48759	-1.63271
DO48733	-0.933983
DO48725	-1.25154
DO48706	-0.829015
DO45251	1.89819
DO23549	3.71876
DO23540	0.056173
DO50793	-0.224403
DO50813	-1.03122
DO45123	1.03885
DO45265	-1.33233
DO23518	-2.55388
DO45235	-1.92733
DO45259	2.42616
DO45247	-1.2844
DO45231	1.10989
DO45107	-3.97056
DO50785	0.80738
DO50815	0.462576
DO23515	0.324352
DO45111	-4.47898
DO48701	-1.85524
DO45127	2.90963
DO45253	0.894548
DO23509	0.831791
DO23546	-0.399906
DO50789	-2.81055
DO23535	0.52505
DO48727	-1.31723
DO48730	0.217496
DO23514	0.805698
DO50808	-0.0172129
DO45105	-3.5762
DO48697	-0.339082
DO45261	-1.85557
DO48732	0.49904
DO23538	-3.39412
DO45096	-2.95322
DO45269	3.5701
DO50844	-0.66664
DO45301	2.06192
DO45233	-1.67952
DO45257	1.31867
DO45249	3.66681
DO48742	-1.71068
DO45091	-1.11951
DO23517	-3.02331
DO45119	1.04324
DO45131	1.12201
DO23551	-2.32626
DO45211	2.34634
DO45092	2.00381
DO48736	-0.863832
DO23530	1.38971
DO45191	-1.0411
DO48717	0.710864
DO45103	0.744477
DO45145	3.56036
DO45275	3.67283
DO45179	-0.95089
DO48679	0.564463
DO48746	-2.25142
DO50774	-1.67178
DO45175	3.27418
DO48761	0.421399
DO23544	-2.03134
DO50855	-0.560275
DO45155	1.83061
DO45303	4.52334
DO227643	-3.98585
DO48721	-3.27316
DO48737	0.790855
DO48712	-1.49592
DO48760	-2.97448
DO45137	0.3781
DO45135	0.688482
DO50787	-1.00691
DO23526	2.09241
DO227801	-1.478
DO50798	0.128287
DO50811	-0.687225
DO45129	0.93815
DO45219	0.683416
GSM362958	-0.780984
GSM362959	1.64706
GSM362960	-1.84376
GSM362964	-1.83337
GSM362965	1.04968
GSM362966	-1.31295
GSM362970	-2.98578
GSM362971	-2.74985
GSM362972	-0.188367
GSM362976	-0.679656
GSM362977	-3.163
GSM362978	-3.65046
GSM362982	2.11243
GSM362983	0.0735449
GSM362984	-1.91229
GSM362986	0.474887
GSM362987	3.30776
GSM362988	-1.56688
GSM362992	-1.01614
GSM362993	-1.13969
GSM362994	-0.944318
GSM363008	-0.0710541
GSM363009	0.152558
GSM363010	0.118771
GSM363011	2.7576
GSM363012	-0.515326
GSM363013	1.23418
GSM363014	-1.31134
GSM363015	-0.00500408
GSM363016	-0.68968
GSM363017	1.17394
GSM363029	0.0159613
GSM363030	1.81424
GSM363031	0.232953
GSM363032	1.26353
GSM363033	0.105469
GSM363034	-1.63105
GSM363035	-3.15131
GSM363036	-1.35536
GSM363037	0.0349332
GSM363038	-1.61787
GSM363039	-1.36796
GSM363048	0.587186
GSM363049	0.324265
GSM363050	-0.831152
GSM363051	1.90263
GSM363052	3.18814
GSM363053	-2.66005
GSM363054	2.80169
GSM363055	3.36984
GSM363056	-0.26578
GSM363057	3.06354
GSM363069	2.44894
GSM363070	3.22237
GSM363071	1.16123
GSM363072	-1.0187
GSM363073	1.46411
GSM363074	1.72833
GSM363075	-1.24066
GSM363076	1.54726
GSM363077	-1.81628
GSM363078	3.91063
GSM363079	1.04764
GSM363080	3.25507
GSM363081	4.1319
GSM363082	-2.97703
GSM363083	1.62746
GSM363084	-0.403009
GSM363085	-1.09308
GSM363086	-2.04344
GSM363087	-1.22858
GSM363098	0.0650819
GSM363099	0.746555
GSM363100	2.43041
GSM363101	-2.46383
GSM363102	-1.70826
GSM363104	-0.443983
GSM363105	1.68007
GSM363106	0.567121
GSM363107	-2.68094
GSM363108	-3.14799
GSM363109	2.51069
GSM363115	-2.55448
GSM363121	4.34932
GSM363122	-1.21449
GSM363123	-0.399214
GSM363124	-4.47329
GSM363125	-0.84286
GSM363126	0.436499
GSM363127	2.96106
GSM363128	0.998067
GSM363129	2.12592
GSM363130	-0.664786
GSM363142	1.61237
GSM363143	0.726188
GSM363144	0.451098
GSM363145	2.33583
GSM363146	3.76753
GSM363147	0.320014
GSM363148	-1.39884
GSM363149	-2.23623
GSM363150	3.48153
GSM363151	-0.644375
GSM363152	-1.48573
GSM363164	-2.26854
GSM363166	-0.542881
GSM363168	-3.88824
GSM363169	1.57915
GSM363170	0.0373184
GSM363172	2.94661
GSM363174	-1.73807
GSM363176	-1.4806
GSM363178	0.185122
GSM363180	-0.146672
GSM363182	-1.81306
GSM363184	3.22245
GSM363186	-3.03165
GSM363188	-1.84607
GSM363190	1.04656
GSM363192	-0.881553
GSM363194	1.23385
GSM363196	1.61245
GSM363198	1.25046
GSM363200	-2.61199
GSM363202	-2.44623
GSM363204	0.713325
GSM363205	-2.18133
GSM363207	2.95019
GSM363209	-0.557999
GSM363211	1.43108
GSM363213	-2.00373
GSM363215	-1.22512
GSM363217	1.33679
GSM363218	4.13024
GSM363220	-0.775612
GSM363222	-0.567504
GSM363224	-0.802171
GSM363226	2.41693
GSM363230	-3.20148
GSM363232	-1.68676
GSM363235	3.95131
GSM363237	3.76029
GSM363239	0.348551
GSM363241	-3.86553
GSM363243	-1.7256
GSM363245	2.10792
GSM363247	0.213913
GSM363249	-0.667924
GSM363251	0.0859559
GSM363263	2.20741
GSM363264	-0.0536854
GSM363265	-0.412121
GSM363266	-1.26714
GSM363267	0.311737
GSM363268	1.78461
GSM363269	-3.06459
GSM363270	-2.92935
GSM363271	3.03445
GSM363272	-0.822695
GSM363273	-4.1497
GSM363274	0.515414
GSM363275	-4.2716
GSM363288	-1.57397
GSM363289	-2.55758
GSM363290	-1.60206
GSM363291	-1.89279
GSM363292	2.61468
GSM363293	-1.2648
GSM363294	0.0725695
GSM363295	-1.1433
GSM363296	-0.759848
GSM363297	0.275907
GSM363298	0.120195
GSM363309	1.49343
GSM363310	1.63585
GSM363311	-1.2963
GSM363312	-1.58674
GSM363313	0.040085
GSM363314	-2.3286
GSM363315	-2.79357
GSM363316	-3.74398
GSM363317	3.22845
GSM363326	-0.631964
GSM363327	-1.93687
GSM363328	2.25924
GSM363329	-1.09906
GSM363330	3.89271
GSM363331	1.07415
GSM363332	0.0586175
GSM363333	1.7209
GSM363335	-3.29242
GSM363336	0.936967
GSM363337	2.35333
GSM363339	1.39498
GSM363341	3.16723
GSM363343	-2.32353
GSM363344	-0.48737
GSM363346	-1.21809
GSM363348	2.65758
GSM363350	3.43805
GSM363352	1.12265
GSM363354	3.29764
GSM363355	2.34941
GSM363357	-0.227906
GSM363358	3.0214
GSM363360	-0.826266
GSM363362	-0.555495
GSM363364	-1.66979
GSM363366	-2.23217
GSM363368	-0.721468
GSM363371	-1.88801
GSM363376	0.394057
GSM363378	-1.76881
GSM363384	1.66052
GSM363386	0.537905
GSM363388	1.18688
GSM363391	-1.65908
GSM363393	0.918508
GSM363400	-0.780453
GSM363404	1.14365
GSM712542	3.13474
GSM890321	0.0471954
GSM890322	-1.19507
GSM890323	-1.39733
GSM890324	-2.05523
GSM890325	-2.48629
GSM890326	2.83121
GSM890327	0.454863
GSM890328	3.28587
GSM890329	-0.688468
GSM890330	-3.20792
GSM890331	-4.67084
GSM890332	-0.998113
GSM890333	-0.989259
GSM890335	-2.21474
GSM890336	0.286748
GSM890337	2.75393
GSM890338	0.0768737
GSM890339	-2.95655
GSM890340	-1.40808
GSM890342	-3.17191
GSM890343	-0.516477
GSM890344	0.7911
GSM890345	-3.43077
GSM890346	2.60716
GSM890347	-0.654487
GSM890348	1.35636
GSM890349	2.9306
GSM890350	2.252
GSM890351	0.295158
GSM890352	2.88681
GSM890353	-0.434363
GSM890354	0.539255
GSM890355	1.93776
GSM890356	-1.49478
GSM890357	-3.10802
GSM890358	-0.842674
GSM890359	0.889362
GSM890360	-3.36822
GSM890361	-1.46677
GSM890362	-0.406052
GSM890363	3.85049
GSM890364	-0.807362
GSM890365	-2.19239
GSM890367	1.2484
GSM890368	-1.15842
GSM890369	-1.58522
GSM890370	-1.65395
GSM890371	1.48612
GSM890372	-0.0385677
GSM890373	-2.20399
GSM890374	1.83566
GSM890375	-0.964879
GSM890376	-1.17581
GSM890377	-2.08081
GSM890378	0.662942
GSM890379	-0.105891
GSM890380	-2.33952
GSM890381	1.39
GSM890382	-2.96249
GSM890383	-0.911223
GSM890384	-2.0235
GSM890385	1.77232
GSM890386	1.30324
GSM890387	1.35715
GSM890388	-0.626877
GSM890389	2.59645
GSM890390	0.238977
GSM890391	-0.874728
GSM890393	0.703569
GSM890394	1.35948
GSM890395	1.43178
GSM890396	2.34798
GSM890397	0.503323
GSM890398	-2.10041
GSM890400	-2.14591
GSM890401	-0.198416
GSM890402	0.880163
GSM890403	0.634604
GSM890405	3.30823
GSM890406	1.07137
GSM890407	-0.72279
GSM890408	-0.0789275
GSM890409	-2.15928
GSM890410	-2.34298
GSM890411	0.385761
GSM890412	0.225907
GSM890413	0.810175
GSM890415	-0.93891
GSM890416	3.40064
GSM890417	-0.241716
GSM890418	-1.18457
GSM890419	-2.20509
GSM890420	2.90981
GSM890421	-1.16576
GSM890422	4.60016
GSM890424	-1.54761
GSM890426	0.28097
GSM890427	1.66548
GSM890428	1.96068
GSM890429	1.54562
GSM890430	-0.149713
GSM890431	-0.125181
GSM890432	-0.376723
GSM890433	1.13428
GSM890434	0.703867
GSM890435	3.95129
GSM890436	1.11426
GSM890437	2.27087
GSM890438	0.813505
GSM890439	1.38185
GSM890440	-0.635539
GSM890441	1.98155
GSM890442	2.00012
GSM890444	2.99539
GSM890445	0.80505
GSM890446	-1.54391
GSM890447	0.632696
GSM890449	-0.720742
GSM890451	2.99221
GSM890452	4.12799
GSM890453	-0.271283
GSM890454	2.12475
GSM890455	-1.20248
GSM890456	2.2603
GSM890457	-0.554835
GSM890458	-0.896105
GSM890459	-2.05057
GSM890460	-0.313673
GSM890461	0.503642
GSM890462	-3.25864
GSM890463	1.77264
GSM890464	-1.97849
GSM890465	-1.29275
GSM890466	-1.05768
GSM890467	-0.954142
GSM890468	0.840159
GSM890469	-2.48419
GSM890470	0.440916
GSM890471	3.45745
GSM890472	2.98777
GSM890473	-0.993104
GSM890475	-0.988902
GSM890476	0.545771
GSM890477	1.66871
GSM890480	-1.57477
GSM890481	1.01386
GSM890482	-1.98527
GSM890483	-0.0294621
GSM890484	-0.899255
GSM890485	1.28113
GSM890486	1.22005
GSM890487	0.845461
GSM890488	-1.81725
GSM890489	0.041211
GSM890490	2.26144
GSM890491	-2.37585
GSM890492	0.158497
GSM890493	0.361956
GSM890494	-2.29277
GSM890495	-3.19737
GSM890496	3.37411
GSM890497	2.70411
GSM890498	-1.9638
GSM890499	4.32701
GSM890500	-1.46883
GSM890501	-0.454688
GSM890502	4.96702
GSM890503	0.242334
GSM890504	1.41826
GSM890505	-3.65729
GSM890507	-1.20228
GSM890508	0.238152
GSM890509	-1.13626
GSM890510	-0.534528
GSM890511	-1.66589
GSM890512	-0.00136083
GSM890513	-1.5228
GSM890514	-3.48911
GSM890515	-0.568393
GSM890516	-0.288321
GSM890517	0.793465
GSM890518	2.77797
GSM890519	-2.19391
GSM890520	1.99334
GSM890521	-0.504553
GSM890522	-2.31369
GSM890523	-3.23886
GSM890524	-0.893284
GSM890525	-1.88093
GSM890526	0.611351
GSM890527	2.78072
GSM890528	1.37619
GSM890529	-0.619373
GSM890530	0.785238
GSM890532	-1.03586
GSM890533	-1.95573
GSM890534	-1.00947
GSM890535	-0.751601
GSM890536	-2.54974
GSM890537	1.91595
GSM890538	-2.38895
GSM890539	-1.5508
GSM890540	-0.846286
GSM890541	-0.407472
GSM890542	-1.4932
GSM890543	0.00312645
GSM890544	-0.7771
GSM890545	-3.41907
GSM890546	2.49692
GSM890547	1.77649
GSM890548	-1.48079
GSM890549	3.04144
GSM890550	3.62988
GSM890551	2.57151
GSM890552	2.50547
GSM890553	1.31182
GSM890554	-1.09615
GSM890555	0.937561
GSM890556	-1.94157
GSM890557	1.34382
GSM890558	0.813978
GSM890559	-1.59715
GSM890560	-0.573123
GSM2011285	2.17708
GSM2011286	0.353893
GSM2011287	-2.59384
GSM2011288	3.07191
GSM2011289	5.65907
GSM2011290	-0.999792
GSM2011291	1.65512
GSM2011292	-0.817958
GSM2011293	-0.743254
GSM2011294	-2.23943
GSM2011295	-0.358377
GSM2011296	1.93891
GSM2011297	-0.631414
GSM2011298	0.559696
GSM2011299	5.73732
GSM2011300	0.874018
GSM2011301	1.04637
GSM2011302	-2.11952
GSM2011303	-0.0494527
GSM2011304	-3.42907
GSM2011305	0.362449
GSM2011306	0.296315
GSM2011307	-2.64484
GSM2011308	-3.03331
GSM2011309	-0.554952
GSM2011310	0.790009
GSM2011311	-2.98482
GSM2011312	0.892363
GSM2011313	2.0844
GSM2011314	0.768654
GSM2011315	-1.5861
GSM2011316	-0.713898
GSM2011317	0.5375
GSM2011318	2.67527
GSM2011319	0.596397
GSM2011320	-0.235235
GSM2011321	0.274977
GSM2011322	2.71991
GSM2011323	-2.70112
GSM2011324	1.87237
GSM2011325	2.83466
GSM2011326	-1.7799
GSM2011327	-1.06272
GSM2011328	-0.667102
GSM2011329	-0.814223
GSM2011330	0.655982
GSM2011331	-0.776774
GSM2011332	-1.47795
GSM2011333	-1.96979
GSM2011334	-0.901527
GSM2011335	-0.493007
GSM2011336	-1.39944
GSM2011337	-1.32799
GSM2011338	-1.60944
GSM2011339	-0.442594
GSM2011340	-0.927124
GSM2011341	-0.842529
GSM2011342	1.6502
GSM2011343	2.4645
GSM2011344	3.34062
GSM2011345	-0.134733
GSM2011346	0.44002
GSM2011347	-0.0446322
GSM2011348	-2.07034
GSM2011349	1.15939
GSM2011350	-2.70925
GSM2011351	1.95399
GSM2011352	-1.89631
GSM2011353	2.03574
GSM2011354	-0.552853
GSM2011355	1.22892
GSM2011356	-0.635278
GSM2011357	-2.80561
GSM2011358	-2.21584
GSM2011359	-4.05061
GSM2011360	0.708988
GSM2011361	0.72469
GSM2011362	-0.718023
GSM2011363	1.64887
GSM2011364	1.28082
GSM2011365	0.134762
GSM2011366	1.63499
GSM2011367	-0.341569
GSM2011368	-1.40632
GSM2011369	0.935052
GSM2011370	0.814663
GSM2011371	-0.533861
GSM2011372	0.376669
GSM2011373	1.22866
GSM2011374	-2.01545
GSM2011375	-0.23068
GSM2011376	0.137448
GSM2011377	0.97697
GSM2011378	-0.0030361
GSM2011379	-0.796998
GSM2011380	2.0637
GSM2011381	0.558967
GSM2011382	0.620309
GSM2011383	0.655108
GSM2011384	-1.08115
GSM2011385	2.14541
GSM2011386	-0.90381
GSM2011387	-0.854839
GSM2011388	-2.00967
GSM2011389	0.299708
GSM2011390	0.878344
GSM2011391	-0.0732
GSM2011392	-1.18787
GSM2011393	1.35446
GSM2011394	-0.705483
GSM2011395	-0.32866
GSM2011396	-0.227496
GSM2011397	0.124054
GSM2011398	2.15554
GSM2011399	-0.211603
